# Supplementary material for: An Integrative Omics-Machine Learning Framework for Predicting Pulmonary Responses to Titanium Dioxide Nanoparticles
Source: Royal Society of Chemistry journal article supplement (doi:10.1039/d5nr04657b), 2026-01-01
Supplement: d5nr04657b1.xlsx [file d5nr04657b1.xlsx]

## Sheet: Title
An Integrative Omics–Machine Learning Framework for Predicting Pulmonary Responses to Titanium Dioxide Nanoparticles
Viacheslav Muratov1, Karolina Jagiello1,2*, Tomasz Puzyn1,2*
1. University of Gdansk, Faculty of Chemistry, Laboratory of Environmental Chemoinformatics, Wita Stwosza 63, 80-308 Gdansk, Poland
2. QSAR Lab Ltd., Trzy lipy 3, 80-172 Gdansk, Poland
Corresponding authors
E-mail: karolina.jagiello@ug.edu.pl, tomasz.puzyn@ug.edu.pl

## Sheet: Table S1
Table S1. Fold change values of 621 DEGs in response to 5 TiO2-NPs in different combinations.
N →						NP_1	NP_2	NP_3	NP_4	NP_5	NP_6	NP_7	NP_8	NP_9	NP_10	NP_11	NP_12	NP_13	NP_14	NP_15	NP_16	NP_17	NP_18	NP_19	NP_20	NP_21	NP_22	NP_23	NP_24	NP_25	NP_26	NP_27	NP_28	NP_29	NP_30
Nanoparticle →						NRCWE-001 (No charge)	NRCWE-001 (No charge)	NRCWE-001 (No charge)	NRCWE-002 (Positively charged)	NRCWE-002 (Positively charged)	NRCWE-002 (Positively charged)	NRCWE-001 (No charge)	NRCWE-001 (No charge)	NRCWE-001 (No charge)	NRCWE-002 (Positively charged)	NRCWE-002 (Positively charged)	NRCWE-002 (Positively charged)	NanoAmor (NRCWE-030)	Nabond (NRCWE-025)	NanoAmor (NRCWE-030)	Nabond (NRCWE-025)	NanoAmor (NRCWE-030)	Nabond (NRCWE-025)	NanoAmor (NRCWE-030)	Nabond (NRCWE-025)	NanoAmor (NRCWE-030)	Nabond (NRCWE-025)	NanoAmor (NRCWE-030)	Nabond (NRCWE-025)	UV-Titan L181	UV-Titan L181	UV-Titan L181	UV-Titan L181	UV-Titan L181	UV-Titan L181
#	GENE ID ↓	GENE NAME ↓	GENE GB_ACC ↓	GENE ↓	GENE_SYMBOL ↓	Fold Change	Fold Change	Fold Change	Fold Change	Fold Change	Fold Change	Fold Change	Fold Change	Fold Change	Fold Change	Fold Change	Fold Change	Fold Change	Fold Change	Fold Change	Fold Change	Fold Change	Fold Change	Fold Change	Fold Change	Fold Change	Fold Change	Fold Change	Fold Change	Fold Change	Fold Change	Fold Change	Fold Change	Fold Change	Fold Change	FoldRank
1	A_51_P337308	NM_011315	NM_011315	20210	Saa3	3.21	20.84	101.94	7.45	253.67	162.31	1.68	-1.26	6.98	3.13	2.74	4.3	1.65	-1.21	37.64	5.49	150.58	34.24	-1.09	1.81	3.58	1	4.25	1.9	2.12	10.41	96	-1.06	-1.05	4.08	253.67
2	A_52_P318673	NM_009117	NM_009117	20208	Saa1	1.73	10.73	40.11	3.83	59.68	44.21	1.24	-1.29	3.48	1.57	1.68	2.25	1.24	-1.19	11.2	2.44	37.48	11.77	1.03	1.65	1.75	1.17	1.85	1.27	1.38	5.13	44.72	-1.01	-1.01	2.24	59.68
3	A_51_P361650	NM_009117	NM_009117	20208	Saa1	1.12	3.6	9.82	1.87	9.63	9.44	1.14	-1.14	1.32	1.02	1.02	1.01	1.07	-1.02	7.38	1.89	21.34	7.1	1.09	1.33	1.14	-1	1.1	1.04	1.12	2.04	9.17	1.03	1.07	1.14	21.34
4	A_51_P510156	NM_008491	NM_008491	16819	Lcn2	1.32	5.07	8.44	2.77	16.23	10.82	-1.03	-1.24	2.82	1.38	1.43	2.45	1.24	-1.11	6.31	3.18	9.87	3.85	1	-1.19	3.08	-1.29	3.55	2.44	1.42	5.15	12.35	-1.14	-1.03	3.93	16.23
5	A_52_P87713	NM_011593	NM_011593	21857	Timp1	1.05	4.75	11.38	2.56	16	11.77	-1.02	-1.16	1.77	1.6	1.29	1.37	1.27	-1.09	7.86	2.97	15.04	7.17	-1.1	1.05	1.59	1.06	1.48	1.22	-1.03	2.39	13.07	-1.01	1.09	1.83	16
6	A_52_P295432	NM_009141	NM_009141	20311	Cxcl5	1.05	6.08	10.36	2.57	8.23	14.93	-1.24	-1.42	4.23	1.87	2.25	5.82	1.82	-1.26	1.93	5.69	2.4	3.86	1.06	1.5	2.8	1.48	2.72	3.36	1.15	2.21	6.54	-1.08	-1.04	4.18	14.93
7	A_51_P141546	NM_011016	NM_011016	18406	Orm2	1.04	3.51	8.75	1.88	8.63	7.09	1.03	-1.2	1.61	1.14	1.28	1.18	1.18	-1.25	6.18	1.9	13.95	4.4	-1.2	-1.15	1.09	-1.18	1.33	-1.02	1.46	1.22	4.06	1.25	1.05	1.21	13.95
8	A_51_P166886	NM_011314	NM_011314	20209	Saa2	1.11	3.76	7.84	1.89	10.08	8.05	1.17	-1.11	1.33	1.05	1.17	1.07	1.19	-1.01	7.42	2.13	12.15	6.16	1.11	1.9	1.16	1.15	1.18	1.14	1.18	2.31	7.27	-1.04	-1.01	1.06	12.15
9	A_51_P224164	NM_011867	NM_011867	23985	Slc26a4	-1.2	3.13	4.76	1.91	7.87	7.07	-2.18	-1.44	3.69	2.8	1.56	2.44	-1.04	-1.87	2.09	2.9	3.14	2.24	1.31	-1.29	2.8	-1.08	2.64	2.99	1.73	3.18	7.83	1.07	1.51	6.62	7.87
10	A_51_P517695	NM_008530	NM_008530	17071	Ly6f	1.12	3.63	5.59	2	7.1	6.56	1.11	-1.08	4.58	1.58	1.9	4.31	1.3	1.02	3.38	1.88	6.43	3.4	1.04	1.04	3.49	-1.06	4.12	3.07	1.23	2.83	5.81	-1.05	-1.05	5.83	7.1
11	A_51_P512379	NM_011593	NM_011593	21857	Timp1	1.06	3.04	6.56	1.77	6.68	6.19	1.03	-1.09	1.41	1.38	1.04	1.28	1.06	-1.17	3.03	1.61	5.81	3.17	1.01	1.13	1.22	1.24	1.12	-1.04	-1.05	1.36	4.24	1.01	1.04	1.2	6.68
12	A_51_P336325	NM_008768	NM_008768	18405	Orm1	1	2.8	6.2	1.77	4.62	4.8	1.06	-1.15	1.34	1.13	1.15	1.19	-1.07	-1.22	2.65	1.42	6.65	2.5	-1.19	-1.2	-1.03	-1.13	1	-1.14	1.32	-1.08	2.65	1.27	1.13	1.2	6.65
13	A_51_P432641	NM_021274	NM_021274	15945	Cxcl10	-1.15	2.51	4.12	1.92	2.56	2.56	-1.23	-1.29	3.26	1.06	2.05	3.93	1.36	1.42	2.39	1.5	6.51	3.18	1.41	1.42	3.24	1.06	2.67	2.36	1.44	1.57	3.57	-1.11	-1.04	2.25	6.51
14	A_51_P436652	NM_013654	NM_013654	20306	Ccl7	-1.11	2.79	5.8	1.7	4.79	5.28	1.37	1.11	3.12	1.6	1.79	3.7	1.38	-1.06	3.17	2	6.31	4.15	-1.12	1.12	2.66	1	2.85	1.53	-1.02	1.16	3.35	-1.14	-1.15	2.79	6.31
15	A_52_P625940	NM_027988	NM_027988	71893	Noxo1	1.19	3.7	4.47	1.85	5.86	5.75	-1.39	-1.35	2.55	1.16	1.19	2.03	1.66	-1.04	3.61	2.69	5.56	3.04	1.42	1.27	2.48	1.25	2.75	2.36	1.26	2.51	5.64	-1.08	1.05	3.45	5.86
16	A_51_P512384	NM_011593	NM_011593	21857	Timp1	1.08	2.35	4.78	1.6	4.84	4.77	1.07	-1.08	1.36	1.2	1.07	1.13	1.14	-1.1	3.17	1.6	5.41	2.97	-1.04	1.14	1.12	1.05	1.06	-1.05	-1.04	1.33	3.71	1.01	1.06	1.16	5.41
17	A_52_P18116	NM_019577	NM_019577	56221	Ccl24	1.48	2.51	3.22	1.42	3.65	3.98	1.46	1.12	-1.26	4.88	-1.01	-1.02	-1.07	-1.6	2.31	1.5	2.86	2.65	-1	1.1	-1.23	1.1	-1.47	-1.24	1.48	-1.35	1.77	1.15	-1.01	-1.14	4.88
18	A_51_P180492	NM_016974	NM_016974	13170	Dbp	1.06	-1.34	-1.8	1.13	-1.67	-2.65	1.5	-1.31	-2.2	-1.3	-1.72	-1.7	3.45	1.16	3.07	1.77	3.47	2	2.64	-1.71	4.34	-1.1	4.79	1.45	-2.17	-2.23	-1.72	1.47	1.2	1.24	4.79
19	A_52_P82741	NM_010479	NM_010479	193740	Hspa1a	1.3	-1.12	1.23	1.22	1.11	1.2	4.54	2.05	1.67	1.62	1.29	1.96	-1	-1.13	1.62	-1.17	1.32	-1.13	-1.88	-1.73	-1.47	-1.6	-1.62	-1.96	-1.24	-1.51	-1.43	-1.37	-1.63	-1.02	4.54
20	A_51_P239737	NM_011082	NM_011082	18703	Pigr	1.01	2.14	2.79	1.61	4.53	3.57	1.2	1.1	2.37	1.45	1.63	1.81	1.14	-1.57	2.12	1.48	2.33	1.78	-1.18	1.09	1.14	1.1	1.29	1.24	1.14	1.52	3.64	-1.15	-1.41	2.47	4.53
21	A_51_P123625	AK152177	AK152177	16365	Irg1	-1.05	2.4	4.48	1.77	3.68	2.67	-1.1	-1.17	4.09	1.17	1.68	4.16	1.15	-1.01	1.96	1.49	3.34	2.3	-1.17	1.1	1.52	-1.08	1.5	1.15	1.17	1.61	2.76	1.36	-1	2.68	4.48
22	A_51_P123630	L38281	L38281	16365	Irg1	1.01	2.54	4.44	1.66	3.22	2.47	1.01	-1.19	3.59	1.2	1.63	3.51	1.27	1	2.02	1.4	2.82	2.41	-1.07	1.17	1.49	1.04	1.44	1.19	1.12	1.44	2.49	1.38	-1	2.56	4.44
23	A_51_P509573	NM_013652	NM_013652	20303	Ccl4	-1.92	1.79	3.35	1.12	2.59	2.54	-1.09	-1.39	2.11	-1.31	1.23	1.61	1.2	-1.25	2.63	1.65	4.34	2.65	1.14	1.41	1.69	1.16	1.8	1.47	1.19	1.52	3.36	1.02	1.06	1.94	4.34
24	A_51_P434017	NM_133903	NM_133903	100689	Spon2	-1.31	1.02	1.73	-1.24	1.32	1.98	-2.1	1.03	1.22	1.19	1.26	-1.06	-1.69	1.17	-1.69	-1.16	-1.59	-1.09	-1.91	-1.11	-3.33	-1.35	-4.32	-1.67	1.22	1.15	1.19	-1.1	1.18	-1.25	4.32
25	A_51_P117952	NM_010479	NM_010479	193740	Hspa1a	1.38	-1.05	1.29	1.16	1.13	1.18	4.31	1.97	1.6	1.5	1.25	1.9	-1.09	-1.17	1.77	-1.15	1.37	-1.13	-1.98	-1.89	-1.56	-1.82	-1.58	-1.9	-1.17	-1.38	-1.39	-1.36	-1.55	-1.03	4.31
26	A_52_P381484	NM_133903	NM_133903	100689	Spon2	-1.34	1.07	1.79	-1.24	1.36	1.79	-2.39	1.01	1.31	1.21	1.34	-1.09	-1.74	1.31	-1.64	-1.03	-1.59	-1.01	-1.67	1.04	-3.23	-1.14	-4.31	-1.39	1.26	1.35	1.45	-1.02	1.26	-1.09	4.31
27	A_52_P208763	NM_013654	NM_013654	20306	Ccl7	-1.04	2.11	4.29	1.55	3.43	3.75	1.23	1.05	2.71	1.4	1.52	3.07	1.38	-1.07	2.33	1.55	4.04	3.29	-1.06	1.06	2.12	1.09	2.29	1.3	-1.01	1.04	2.33	-1.11	-1.12	1.9	4.29
28	A_51_P286737	NM_011333	NM_011333	20296	Ccl2	-1.03	2.1	4.1	1.62	3.64	3.97	1.09	1.02	2.97	1.4	1.53	2.76	1.15	-1.22	2.2	1.72	4.09	2.75	-1.05	1.14	2.26	1.07	2.49	1.52	1.17	1.23	3.32	-1.11	-1.14	2.41	4.1
29	A_51_P325836	NM_017371	NM_017371	15458	Hpxn	1.23	2.04	3.11	1.51	3.66	2.96	-1.08	-1.13	-1.03	1.11	1.62	1.15	1.71	1.07	2.43	2.36	4.06	2.67	1.23	1.42	1.01	1.11	1.27	1.13	-1.19	1.12	1.56	-1.01	-1.04	1.13	4.06
30	A_51_P114462	NM_011332	NM_011332	20295	Ccl17	1.08	1.81	3.43	1.81	4.01	4.06	1.32	1.21	1.26	2.38	1.64	-1.02	1.23	-1.23	2.41	1.57	2.8	2.09	1.21	1.18	1.18	1.14	1.29	1.19	1.3	2.25	3.09	1.1	1.22	1.12	4.06
31	A_51_P488739	NM_030701	NM_030701	80885	Gpr109a	1.31	1.97	2.54	1.27	2.35	2.11	1.13	-1.04	1.41	1.07	1.13	1.33	1.36	-1.08	2.13	1.72	3.98	2.09	1.66	1.63	1.72	1.63	2.27	1.89	1.23	1.1	1.61	1.14	-1.1	1.35	3.98
32	A_51_P256827	NM_013650	NM_013650	20201	S100a8	-1.02	1.45	1.99	1.22	1.33	1.41	-1.01	1.04	1.13	-1.31	1.59	-1.27	-1.37	1.16	-1.01	1.29	1.34	-1.03	-1.73	-1.34	-1.91	-1.96	-2	-1.44	2.08	3.92	2.14	1.34	-1.01	1.07	3.92
33	A_51_P470079	NM_010555	NM_010555	16178	Il1r2	1.76	2.08	3.41	1.4	2.65	2.49	1.15	1.08	1.4	-1.07	1.38	1.2	1.05	1.01	2.02	1.4	3.89	1.9	-1.46	-1.44	-1.18	-1.58	-1.27	-1.25	1.14	1.5	2.34	1.09	-1.09	1.21	3.89
34	A_51_P358765	NM_009263	NM_009263	20750	Spp1	1.15	1.67	1.79	1.18	1.66	1.48	-1.16	1.03	3.68	-1.08	1.4	3.89	-1.04	-1.15	1.26	1.07	1.44	1.08	1.13	1.83	2.22	1.28	3.76	1.76	1.18	1.55	1.85	-1.34	-1.37	2.37	3.89
35	A_52_P463936	NM_015783	NM_015783	53606	Isg15	-1.16	1.53	2.03	1.19	1.54	1.93	-1.12	-1.34	2.39	-1.02	1.59	2.78	1.11	1.23	1.66	1.15	3.89	2.06	-1.21	1.02	1.84	-1.3	1.82	1.57	1.38	1.28	2.04	-1.01	1.01	2.25	3.89
36	A_51_P487818	NM_017399	NM_017399	14080	Fabp1	1.14	-1.46	-3.49	-1.66	-3.86	-2.29	-1.2	-1.08	-2.13	-1.73	-1.06	-2.28	1.07	1.56	-1.13	1.2	-2.38	-3.26	1.06	1.56	-1.3	1.33	-1.04	1.23	-1.22	1.09	-1.98	1.02	-1.2	-2.35	3.86
37	A_51_P265374	NM_011979	NM_011979	26464	Vnn3	1.24	2.16	3	1.49	2.84	2.84	1.14	1.08	1.48	1	1.34	1.32	1.33	-1.02	2.58	1.64	3.77	2.13	-1.11	-1.17	1.43	-1.1	1.36	1.24	1.16	1.48	2.48	-1.03	-1.06	1.52	3.77
38	A_52_P412585	NM_007894	NM_007894	13586	Ear1	-1.14	-1.44	-2.8	-1.68	-3.69	-3.09	-1.21	1.01	-1.23	-1.09	-1.14	-1.7	-1.18	-1.01	-1.8	-1.64	-2.51	-2.22	1.5	1.42	1.01	1.41	1.15	1.35	-1.22	1.07	-1.73	-1.09	-1.56	-3.39	3.69
39	A_51_P464703	NM_021443	NM_021443	20307	Ccl8	1.02	1.19	1.96	1.69	2.32	2.21	1.18	-1.09	1.95	3.41	2.02	2.81	1.03	-1.12	1.35	1.56	3.61	2.51	-1.1	1.32	1.69	1.12	1.8	1.67	1.88	1.12	2.67	1.02	-1.24	1.87	3.61
40	A_51_P493234	NM_007752	NM_007752	12870	Cp	-1.07	1.7	2.62	1.57	3.61	3.05	1.07	1.25	1.29	1.01	1.09	1.16	1.08	-1.31	1.67	1.4	2.69	2	1.06	1.32	1.05	1.28	1.09	1.11	-1.04	1.5	3.39	1.01	-1.29	1.71	3.61
41	A_51_P112966	NM_009890	NM_009890	12642	Ch25h	1.47	2.89	3.03	2.08	3.43	2.99	1.27	1.02	2.39	1.69	1.45	2.15	2.1	1.33	2.67	2.6	3.56	3.04	1.06	-1.1	1.78	-1.13	2.66	1.56	1.31	2.14	3.36	1.11	1.27	1.95	3.56
42	A_51_P212782	NM_008361	NM_008361	16176	Il1b	1.37	2.54	3.54	1.85	2.59	2.8	1.16	1.01	2.46	1.41	1.65	1.47	1.49	1.57	1.6	1.89	2.78	1.83	-1.1	-1.31	-1.67	-1.34	-1.28	-1.09	1.61	2.73	2.82	1.15	-1.02	1.32	3.54
43	A_51_P438967	NM_053110	NM_053110	93695	Gpnmb	1.19	1.59	1.49	1.58	1.65	1.12	-1.2	-1.2	3.54	-1	1.25	3.21	1.44	-1.05	1.41	1.39	1.65	1.61	1.17	1.18	2.4	1.35	3.19	1.76	-1.05	1.2	1.3	1.13	1.17	2.44	3.54
44	A_52_P249514	NM_011331	NM_011331	20293	Ccl12	-1.15	1.67	2.42	1.24	2.01	2.56	1.18	1	1.59	1.01	1.49	2.28	1.31	-1.04	2.28	1.56	3.53	2.76	-1.06	-1.04	2.02	-1.31	2.45	1.61	1.1	1.2	1.99	-1.39	-1.47	1.38	3.53
45	A_52_P431159	NM_031167	NM_031167	16181	Il1rn	1.15	1.67	2.08	1.32	1.67	1.66	-1.24	-1.29	1.61	-1.24	1.06	1.37	1.14	1.28	2.08	1.57	3.49	2.14	1.12	1.01	1.68	-1.07	1.9	1.55	1.03	1.29	1.68	-1.04	-1.03	1.35	3.49
46	A_51_P362176	NM_133862	NM_133862	99571	Fgg	1.42	1.24	1.4	1.07	1.39	2.12	-1.29	-1.2	-1.25	-1.16	1.36	-1.18	1.52	1.08	1.41	3.43	1.06	1.19	1.32	1.16	-1.11	-1.09	1.18	-1.01	-1.38	-1.42	-1.61	-1.44	-1.73	-1.2	3.43
47	A_51_P421876	NM_016850	NM_016850	54123	Irf7	-1.03	1.44	1.59	1.18	1.31	1.27	-1.05	-1.14	2.77	1.15	1.64	3.39	1.01	-1.04	1.2	1.01	1.94	1.55	1.01	1.1	2.28	1.04	2.18	1.61	1.19	-1.06	1.3	1.09	-1.01	2.56	3.39
48	A_51_P499698	BC057938	BC057938	67855	2300003P22Rik	2.08	1.55	3.39	1.18	1.72	1.31	1.14	1.01	1.32	-1.22	1.2	1.04	1.17	1.15	1.33	1.49	2.01	1.25	-1.28	-1.17	-1.34	-1.37	-1.37	-1.12	1.14	1.41	1.27	1.14	-1.02	1.11	3.39
49	A_51_P110301	NM_009778	NM_009778	12266	C3	1.24	1.94	2.75	1.63	3.39	3.23	-1.16	-1.16	1.35	1.34	1.13	1.32	-1	-1.26	1.82	1.13	2.85	2.04	1.03	-1.01	1.45	-1.11	1.24	1.27	1.28	1.12	2.32	1.26	1.23	1.75	3.39
50	A_51_P159453	NM_009252	NM_009252	20716	Serpina3n	1.22	1.88	3.01	1.48	3.2	3.32	1.1	1.11	1.17	1.1	1.32	1.12	-1.11	-1.12	1.63	1.26	2.55	1.58	-1.22	-1.26	1.06	-1.34	1.19	-1.03	1.1	1.45	2.63	-1.04	-1.06	1.07	3.32
51	A_52_P210511	NM_011612	NM_011612	21942	Tnfrsf9	1.02	1.96	3.11	1.52	3.29	2.91	1.07	-1.06	1.64	1.25	1.12	1.45	1.19	-1.09	2.21	1.78	2.89	2.13	-1.02	-1.01	1.34	-1.05	1.3	1.1	1.05	1.4	2.27	1.12	1.08	1.43	3.29
52	A_51_P269546	NM_031254	NM_031254	83433	Trem2	-1.04	-1.05	1.19	1.15	1.07	-1.13	-1.15	-1.29	2.5	1.27	1.11	2.35	1.2	-1.04	-1.08	-1.01	1.55	1.48	1.4	1.22	2.75	1.16	3.22	1.94	1.11	-1.09	1.33	1.38	1.37	3.14	3.22
53	A_52_P52803	NM_010479	NM_010479	193740	Hspa1a	1.35	1.1	1.35	1.14	1.13	1.19	3.1	1.6	1.34	1.44	1.17	1.74	1.01	-1.07	1.51	-1.12	1.3	1.02	-1.91	-1.84	-1.63	-1.73	-1.63	-1.92	-1.08	-1.25	-1.2	-1.36	-1.43	-1.08	3.1
54	A_51_P461429	NM_007825	NM_007825	13123	Cyp7b1	-1.08	1.6	2.3	1.25	1.79	2.26	-1.01	-1.01	1.4	1.01	1.05	1.08	1.22	1.13	1.91	1.36	3.1	1.66	1.16	1.03	1.66	1.12	1.68	1.45	1.08	1.13	2.4	-1.08	1.07	1.3	3.1
55	A_51_P154842	NM_145153	NM_145153	243262	Oas1f	-1.11	1.26	1.33	1.04	1.13	1.19	-1.18	-1.24	2.72	1.18	1.68	2.98	1.04	1.03	1.13	-1	1.59	1.32	1.1	1.08	1.72	1.03	1.77	1.61	1.43	1.04	1.8	1.08	1.03	3.1	3.1
56	A_51_P246317	NM_008630	NM_008630	17750	Mt2	1.87	1.64	2.75	1.59	3.09	2.96	1.04	-1.01	1.09	1.09	1.06	-1.08	1.32	-1.05	1.98	1.46	2.44	2.07	1.26	1.24	1.19	1.09	1.25	1.02	1.04	1.19	2.04	-1.11	-1.14	1.08	3.09
57	A_52_P416756	NM_033075	NM_033075	110956	D17H6S56E-5	1.14	1.8	2.09	1.51	2.86	3.09	1.11	1.04	1.68	1.37	1.26	1.59	1.16	-1.3	1.36	1.25	1.96	1.74	-1.19	-1.21	1.08	-1.19	1.06	-1.18	1.16	1.28	2.04	1.02	-1.18	1.43	3.09
58	A_51_P481721	NM_016771	NM_016771	53315	Sult1d1	1.12	-1.1	-1.25	-1.43	-1.01	-1.09	1.81	1.49	-1.21	1.26	1.1	1.74	-1.58	-1.88	-1.49	-1.07	-1.32	-2.41	1.05	1.92	1.24	2.42	1.18	1.2	1.01	-2	-1.19	-1.97	-3.07	1.4	3.07
59	A_51_P172853	NM_009841	NM_009841	12475	Cd14	1.05	1.87	2.4	1.56	2.39	3.05	1.01	-1.03	1.73	1.29	1.25	1.62	1.06	-1.28	1.25	1.51	2	1.41	1.02	1.35	1.18	1.32	1.35	1.36	1.17	1.39	2.52	-1.09	-1.23	1.83	3.05
60	A_52_P410449	NM_010215	NM_010215	14204	Il4i1	1.01	2.26	3.01	1.49	2.48	2.84	-1.16	-1.16	1.82	1.43	1.66	1.66	1.59	-1.01	1.87	2.15	2.78	1.98	1.13	1.33	1.61	1.01	1.53	1.43	1.55	1.57	2.24	1.13	-1	1.69	3.01
61	A_51_P268535	NM_053112	NM_053112	93725	Ear10	-1.03	-1.24	-2.06	-1.53	-2.93	-2.26	-1.11	-1.02	-1.14	1.04	-1.04	-1.46	1.05	-1.02	-1.71	-1.58	-1.86	-1.88	1.24	1.22	-1.05	1.33	1.09	1.32	-1.08	1.24	-1.28	-1.09	-1.34	-2.33	2.93
62	A_51_P363187	NM_008176	NM_008176	14825	Cxcl1	-1.23	1.62	2.33	1.46	2.21	2.36	-1.12	-1.13	1.61	1.3	1.21	1.71	1.31	-1.21	1.25	1.6	1.88	2.9	1.24	1.27	1.73	1.33	1.63	1.21	-1.16	1.22	2.08	1.05	1.08	1.54	2.9
63	A_52_P131423	AK007371	AK007371	17190	Mbd1	1.55	1.58	1.88	1.47	1.82	1.9	1.87	1.44	1.98	1.48	1.52	1.24	1.86	1.47	2.88	2.03	2.4	1.62	-1.18	-1.52	-1.12	-1.41	1.09	-1.19	1.09	1.28	1.57	-1.01	1.02	1.15	2.88
64	A_52_P337357	NM_145211	NM_145211	246730	Oas1a	-1.05	1.25	1.37	1.14	1.16	1.23	-1.08	-1.22	2.52	1.14	1.63	2.85	1.03	1	1.17	-1.03	1.88	1.53	-1.16	1.02	1.67	1.03	1.72	1.54	1.25	-1.04	1.5	-1.01	-1	2.49	2.85
65	A_52_P267651	NM_007489	NM_007489	11865	Arntl	-1.07	1.09	1.27	-1.26	1.3	1.77	-1.66	1.07	1.32	1.18	1.58	1.44	-1.79	-1	-2.33	-1.19	-2.84	-1.6	-1.28	1.23	-2.13	1.13	-2.54	-1.01	1.31	1.3	1.12	-1.25	-1.13	-1.27	2.84
66	A_51_P383032	NM_010819	NM_010819	17474	Clec4d	1.49	1.78	2.83	1.4	2.23	2	1.21	-1.09	1.75	1.32	1.53	1.83	1.07	1.08	1.74	1.46	2.37	1.73	-1.62	-1.34	-1.35	-1.66	-1.22	-1.44	1.37	1.64	1.72	1.33	-1.03	1.54	2.83
67	A_52_P472324	NM_011414	NM_011414	20568	Slpi	2.05	1.19	2.05	1.57	2.14	1.96	-1.68	-1.45	1.09	1.32	-1.2	1.08	-1.07	-1.22	1.38	-1.22	2.2	1.82	1.11	-1.39	1.38	-1.56	1	1.05	-1.06	2.03	2.81	1.32	1.14	2.53	2.81
68	A_51_P455338	NM_053113	NM_053113	93726	Ear11	-1.01	-1.43	-2.25	-1.36	-2.66	-2.33	-1.26	1.03	-1.14	-1.04	-1.02	-1.53	-1	1.15	-1.28	-1.22	-1.84	-1.73	1.53	1.53	1.19	1.11	1.22	1.41	1.03	1.28	-1.66	1.04	-1.25	-2.8	2.8
69	A_51_P134468	NM_033075	NM_033075	110956	D17H6S56E-5	1.12	1.83	2.13	1.36	2.77	2.77	1.07	1.02	1.58	1.41	1.27	1.47	1.07	-1.34	1.22	1.3	2.06	1.74	-1.14	-1.18	1.14	-1.14	1.08	-1.19	1.14	1.35	2.12	-1.16	-1.21	1.42	2.77
70	A_51_P424532	NM_011704	NM_011704	22361	Vnn1	1.01	1.73	2.42	1.4	2.37	2.55	-1.19	-1.14	1.91	1.02	1.22	1.71	1.26	1.27	2.22	1.62	2.33	2.11	1.09	-1.08	2.06	-1.08	2.16	1.75	-1.01	1.88	2.77	1.08	1.03	2.14	2.77
71	A_51_P361830	NM_144945	NM_144945	246316	Lgi2	1.05	1.37	1.89	1.3	1.84	1.9	-1.09	-1.23	1.1	-1.13	-1.22	-1.06	1.34	1.1	2.25	1.54	2.76	1.72	-1.03	-1.16	1.21	-1.02	1.31	1.23	1.11	1.26	1.65	1.01	1.02	1.24	2.76
72	A_51_P269404	NM_008030	NM_008030	14262	Fmo3	1.05	-1.49	-2.24	-1.34	-1.78	-2.45	1.38	1.47	-1.26	1.01	1.22	1.13	-1.19	-1.8	-1.65	-1.55	-2.75	-1.95	1.12	1.29	1.28	1.55	1.38	1.33	-1.25	-1.7	-2	-1.18	-1.71	1.3	2.75
73	A_51_P235816	AF024519	AF024519	14605	Tsc22d3	1.64	1.04	-1.05	1.23	1.13	-1.1	2.72	1.66	1.48	1.45	1	1.51	1.27	1.03	1.78	1.07	1.45	1.24	-1.26	-1.82	1.16	-1.44	1.53	-1.6	-1.43	-1.17	-1.19	-1	-1.14	1.19	2.72
74	A_51_P263471	NM_020001	NM_020001	56620	Clec4n	1.03	1.45	1.66	1.01	1.16	1.42	-1.08	-1.23	1.57	-1.04	1.15	1.38	1.12	1.01	1.57	1.18	2.72	1.62	1.09	-1.02	1.37	-1.04	1.77	1.44	1.02	1.54	2.07	-1.03	-1.16	1.2	2.72
75	A_51_P185660	NM_011338	NM_011338	20308	Ccl9	1.6	1.83	2.61	1.48	2.33	2.15	-1.04	-1.23	1.62	1.98	1.35	1.87	1.04	-1.03	1.67	1.57	2.72	1.86	1.02	1.17	1.61	-1.09	1.97	1.44	1.55	1.38	2.22	1.08	-1.01	2.03	2.72
76	A_51_P230175	NM_007529	NM_007529	12032	Bcan	-1.15	-1.51	-2.68	-1.35	-2.41	-2.67	-1.14	-1.06	-1.45	-1.09	-1.23	-1.77	-1.34	1.12	-1.93	-1.53	-2	-1.83	-1.09	1.08	-1.44	1	-1.73	-1.11	-1.16	-1.07	-1.6	-1.12	-1.03	-1.68	2.68
77	A_51_P413866	NM_008198	NM_008198	14962	Cfb	1.11	1.33	1.71	1.38	1.82	1.75	-1	-1.09	1.4	1.17	1.23	1.59	1	-1.11	1.92	1.07	2.67	1.81	1	1.09	1.66	-1.27	1.47	1.37	1.11	1.12	1.95	1.19	1.13	1.67	2.67
78	A_51_P282760	NM_011066	NM_011066	18627	Per2	1.05	-1.15	-1.44	1.02	-1.28	-1.54	2.01	1.1	-1.28	-1.08	-1.34	-1.09	1.97	-1.12	2.66	1.19	2.55	1.32	1.1	-1.81	1.85	-1.42	2.54	-1.23	-1.3	-1.17	-1.2	-1.12	-1.25	-1.01	2.66
79	A_52_P565507	NM_017388	NM_017388	53876	Ear3	-1.02	-1.26	-1.91	-1.63	-2.65	-2.01	-1.05	1.02	-1.05	1.1	-1.13	-1.48	-1.24	-1.07	-1.5	-1.44	-1.61	-1.82	1.42	1.29	1.11	1.04	1.27	1.3	-1	1.32	-1.15	-1.05	-1.17	-1.64	2.65
80	A_51_P306017	NM_007865	NM_007865	13388	Dll1	-1.19	-1.23	-1.05	-1.01	-1.14	-1.16	2.07	1.74	1.38	1.14	-1.07	1.17	2.01	2	2.64	1.97	2.39	2.11	-1.13	-1.42	1.17	1.12	1.19	-1.09	-1.22	-1.03	1.07	-1.11	-1.25	-1.19	2.64
81	A_51_P257951	NM_020509	NM_020509	57262	Retnla	-1.28	1.02	1.21	1.57	2.64	1.91	1.6	1.32	1.19	2.14	1.44	-1.03	1.01	1.28	1.6	1.59	1.29	1.26	1.02	1.15	-1.27	1.27	-1.15	-1.35	1.53	1.59	2.58	-1.01	-1.16	1.47	2.64
82	A_51_P139108	NM_019696	NM_019696	56264	Cpxm1	-1	1.45	1.48	1.41	1.41	1.34	1.09	-1.22	1.27	1.09	-1.17	-1.11	-1.04	1.16	1.74	1.26	2.63	1.69	-1.31	-1.13	1.12	-1.15	-1.03	1	1.2	1.07	1.26	1.32	1.24	1.35	2.63
83	A_51_P490456	NM_178373	NM_178373	14311	Cidec	-1.05	-1.59	-2.54	-1.16	-2.27	-1.95	-1.12	1.18	-1.69	1.17	-1	-1.26	-1.07	-1.1	-2.01	-1.62	-2.24	-2.62	-1.06	1.1	-1.31	1.22	-1.32	-1.02	1.94	-1.94	-2.24	1.43	1.2	-1.08	2.62
84	A_51_P385718	NM_026862	NM_026862	68891	Cd177	1.05	1.54	2.36	1.11	1.75	1.84	-1.03	-1.28	1.17	1.19	1.35	1.53	-1.07	-1.1	1.53	1.14	2.6	1.37	-1.04	-1.02	-1.05	-1.01	1.21	1.03	-1.06	1.03	2.18	-1.1	-1.13	1.25	2.6
85	A_52_P141608	NM_183160	NM_183160	226040	E030010A14Rik	1.22	1.2	1.19	1.34	1.12	1.36	1.34	1.19	1.3	1.09	-1.08	-1.32	1.74	1.84	2.37	1.71	2.58	2.07	-1.25	-1.39	-1.16	-1.18	-1.03	-1.15	-1.05	1.22	1.4	1.29	1.22	-1.04	2.58
86	A_51_P235821	NM_010286	NM_010286	14605	Tsc22d3	1.69	1.05	-1.02	1.32	1.18	1.02	2.57	1.66	1.46	1.37	-1.06	1.43	1.23	1.04	1.69	1.13	1.49	1.2	-1.3	-1.75	1.14	-1.41	1.53	-1.53	-1.29	-1.12	-1.19	-1.03	-1.19	1.03	2.57
87	A_52_P314705	NM_010931	NM_010931	18140	Uhrf1	-1.15	1.56	2	1.42	2.34	2.46	1.11	-1.22	1.33	1.36	1	-1.04	1.34	1.09	1.51	1.67	2.5	2.13	1.02	1.04	1.13	1.13	1	1.02	1.03	1.39	2.56	1.1	-1.11	1.21	2.56
88	A_51_P464918	NM_019453	NM_019453	54483	Mefv	1.14	2.11	2.3	1.27	1.69	1.57	-1.31	-1.14	1.16	1.04	1.3	1	1.13	1.14	1.72	1.3	2.56	1.33	1.12	1.02	-1.07	-1.11	-1.09	1.17	1.28	1.37	1.9	1.36	1.07	1.16	2.56
89	A_51_P494125	NM_007431	NM_007431	11647	Akp2	-1.03	1.56	2.22	1.33	2.53	2.01	1.03	-1.04	1.38	1.23	1.13	1.35	-1.07	-1.07	1.42	1.13	1.82	1.47	-1.06	-1.02	1.15	-1.03	1.11	1	1.07	1.41	2.53	1.03	1.01	1.45	2.53
90	A_51_P110455	NM_013559	NM_013559	15505	Hsp110	1.23	1.03	1.26	1.01	1.04	1.36	2.53	1.6	1.11	1.68	1.46	1.9	-1.25	-1.13	1.21	-1.18	1.04	-1.15	-2.48	-1.19	-1.96	-1.33	-1.97	-2.17	1.07	-1.04	1.12	-1.42	-1.65	1.04	2.53
91	A_51_P437309	NM_145209	NM_145209	231655	Oasl1	-1.06	1.2	1.38	1.13	1.2	1.12	-1.22	-1.16	2.14	1.03	1.47	2.52	-1.01	-1.11	-1.01	-1.14	1.67	1.23	1.05	1.22	1.66	1.15	1.48	1.55	1.18	1.08	1.45	1	-1.02	1.85	2.52
92	A_51_P255699	NM_010809	NM_010809	17392	Mmp3	-1.28	1.18	2.12	1.49	1.99	1.78	-1.17	-1.04	1.01	1.02	1	-1.03	-1.43	1.09	1.51	1.2	2.51	2.06	-1.1	1.11	-1.1	1.33	-1.2	1.05	-1.01	1.09	1.86	1.03	1.11	-1.05	2.51
93	A_52_P803082	AK050122	AK050122	223672	BC020489	-1.16	-1.13	-1.13	1.02	-1.12	-1.17	-1.08	-1.17	1.84	1.06	1.58	2.5	-1.06	-1.03	-1.02	-1.13	1.19	1.27	1.04	1.14	1.81	1.23	1.45	1.49	1.04	-1.22	1.02	1.07	1.1	1.73	2.5
94	A_51_P358012	NM_009253	NM_009253	20717	Serpina3m	1.01	1.58	2.4	1	2.23	2.26	-1.13	1.12	-1.04	-1.09	1.5	1.04	1.41	1.12	1.71	1.96	2.48	1.74	-1.01	1.1	-1.01	-1.03	-1.01	1.02	-1.05	-1.28	1.19	1.06	1.04	-1.04	2.48
95	A_52_P218058	NM_001038604	NM_001038604	23845	Clec5a	-1.19	1.38	1.99	1.19	1.6	1.56	-1.3	-1.33	1.95	-1.01	1.23	1.87	1.13	1.09	1.49	1.45	2.26	1.62	1.22	1.19	2.05	1.15	2.48	1.77	1.12	1.53	2.21	1.14	1.14	1.93	2.48
96	A_51_P277216	NM_027836	NM_027836	109225	Ms4a7	-1.01	1.01	-1.03	1.13	-1.15	-1.28	-1.37	-1.44	1.86	1.11	1.23	2.2	-1.11	1.03	-1.04	-1.21	1.38	1.41	1.07	1.14	2.11	1.03	2.47	1.78	1.12	-1.02	1.12	1.19	1.2	2.45	2.47
97	A_52_P157726	NM_053111	NM_053111	93719	Ear6	-1.07	-1.28	-1.83	-1.48	-2.46	-1.85	-1.08	1.03	-1.05	1.08	-1.05	-1.33	1.02	1.02	1.02	1.08	1.06	1.01	1.3	1.11	1.11	1.02	1.32	1.29	-1.05	1.15	-1.12	-1.11	-1.14	-1.53	2.46
98	A_52_P446364	AK122570	AK122570	246316	Lgi2	1.01	1.41	1.9	1.23	1.88	1.71	1.02	-1.18	1.31	1.02	-1.11	1.01	1.05	-1.07	1.78	1.33	2.45	1.74	-1.15	-1.25	1.27	1.04	1.26	1.08	-1.14	1.12	1.99	1.02	1.03	1.65	2.45
99	A_52_P254817	NM_020509	NM_020509	57262	Retnla	-1.17	1.04	1.13	1.53	2.43	1.82	1.57	1.41	1.25	1.97	1.49	1.03	-1.09	1.31	1.64	1.59	1.5	1.21	1.12	1.08	-1.16	-1.09	-1.04	-1.24	1.54	1.79	2.35	-1.01	-1.06	1.49	2.43
100	A_52_P2754	NM_019467	NM_019467	11629	Aif1	-1.21	1.04	1.25	1.02	1.09	1.26	-1.02	-1.1	1.54	1.12	1.13	1.49	1.07	1.08	1.3	1.23	2.43	1.51	1.12	1.07	1.47	-1.13	1.58	1.46	1.56	1.29	1.6	1.16	1.07	1.43	2.43
101	A_52_P578732	NM_009917	NM_009917	12774	Ccr5	-1.05	1.24	1.64	1.08	1.2	1.61	1.04	-1.18	1.41	1.19	1.2	1.27	1.18	1.01	1.32	1.17	2.41	1.63	1.17	1.12	1.1	1.1	1.55	1.48	1.2	1.25	1.68	-1.05	-1.02	1.24	2.41
102	A_51_P280446	NM_022324	NM_022324	64136	Sdf2l1	1.14	1.67	2.25	1.11	2.12	2.41	1.12	-1.01	1.18	1.52	1.16	1.27	1.15	1.03	1.57	1.36	2.19	1.65	-1.24	1.01	-1.16	1.03	-1.12	-1.07	1.24	1.11	1.87	-1.01	-1.13	-1.01	2.41
103	A_51_P142972	NM_029947	NM_029947	77630	Prdm8	-1.18	1.05	-1.39	1.03	-1.5	-1.3	-2.02	-1.57	-1.39	-1.57	-1.31	-2.41	-1.15	1.59	-1.48	1.15	-1.04	-1.34	1.43	1.71	1.05	1.47	-1.04	1.9	1.32	1.74	1.29	1.4	1.64	-1.01	2.41
104	A_51_P206144	NM_133733	NM_133733	71566	9030425E11Rik	-1.17	1.36	2.41	1.1	2.07	2.19	-1.28	-1.04	1.53	-1.18	-1.04	1.21	1.03	1.13	1.48	1.33	1.57	1.49	-1.19	-1.07	1.1	-1.02	1.02	1.01	1.22	1.05	1.63	1.03	1.05	1.16	2.41
105	A_51_P140710	NM_011337	NM_011337	20302	Ccl3	-1.3	1.71	2.38	1.16	1.89	1.84	-1.11	-1.18	1.74	-1.02	1.11	1.57	1.23	-1.03	1.62	1.36	2.27	1.87	1.06	1.29	1.58	1.18	1.71	1.24	1.05	1.29	1.95	1.06	1.05	1.61	2.38
106	A_52_P653054	NAP007796-001		NA		-1.01	1.3	1.34	1.15	1.07	1.19	-1.07	-1.3	1.74	-1.01	1.49	2.15	1.22	1.17	1.27	1.12	2.37	1.46	-1.09	1.31	1.89	1.11	1.72	1.75	1.36	1.33	1.9	1.04	-1.01	1.87	2.37
107	A_52_P422494	NM_145634	NM_145634	246746	Cd300lf	1.13	1.86	1.55	1.2	1.48	1.22	-1.22	-1.2	1.89	-1.01	1.23	1.49	1.57	1.15	1.77	1.5	2.36	1.63	1.56	1.07	1.54	1.05	1.89	1.66	1.1	1.72	2.04	1.3	1.22	2	2.36
108	A_51_P117752	NM_009714	NM_009714	11889	Asgr1	-1.06	-1.34	-1.79	-1.24	-1.55	-1.82	1.12	1.39	-1.27	-1.27	-1.04	-1.13	1	-1.44	-1.8	-1.09	-2.36	-1.52	1.04	1.65	-1.25	1.66	-1.33	1.06	-1.26	-1.34	-1.58	1.01	-1.23	1.04	2.36
109	A_51_P515639	NM_007782	NM_007782	12986	Csf3r	1.14	1.63	1.79	1.15	1.66	1.67	1.05	-1.01	1.22	-1.02	1.32	-1.02	1.08	1.18	1.7	1.43	2.36	1.25	-1.09	-1.09	-1.31	-1.25	-1.14	1.1	1.23	1.7	1.51	1.2	1.02	1.09	2.36
110	A_51_P269549	NM_031254	NM_031254	83433	Trem2	1.08	-1.03	1.17	1.14	1.12	-1.04	-1.15	-1.21	2.22	1.12	1.04	2.03	1.04	-1.08	1.09	-1.13	1.56	1.33	1.15	1.17	2.05	1.02	2.36	1.53	1.05	-1.1	1.16	1.21	1.23	2.14	2.36
111	A_52_P635388	NM_022431	NM_022431	64382	Ms4a11	1.03	1.37	1.68	1.06	1.39	1.54	-1.03	-1.03	1.7	1.47	1.21	1.78	-1.06	-1.13	1.27	1.13	2.36	1.52	1.01	-1.16	1.26	-1.2	1.4	1.14	1.18	1.16	1.65	1	-1.1	1.22	2.36
112	A_52_P39575	NM_008165	NM_008165	14799	Gria1	-1.12	-1.29	-1.47	-1.22	-1.46	-1.34	1.15	1.23	-1.28	-1.29	-1.18	-1.29	-1.29	-1.01	-1.58	-1.27	-1.83	-2.35	1.02	-1.01	1.06	-1.1	1.07	1	-1.06	1.02	-1.63	-1.04	-1.07	-1.25	2.35
113	A_52_P644005	AK009704	AK009704	20680	Sox7	-1.49	-1.56	-1.79	-1.39	-2.3	-2.34	1.48	1.08	-1.04	-1.32	-1.2	-1.62	-1.26	1.03	1.53	-1.19	-1.07	-1.47	-1.28	-1.05	1.06	1.13	-1.02	-1.09	-1.38	-1.13	-1.38	1.09	-1.08	-1.57	2.34
114	A_51_P212754	NM_009369	NM_009369	21810	Tgfbi	1.12	1.37	1.64	1.25	1.63	1.59	-1.06	-1.12	1.33	1.06	1.04	1.21	1.02	-1.01	1.49	1.33	2.33	1.6	-1.03	-1.01	1.26	-1.25	1.29	1.19	1.14	1.34	1.82	1.09	-1.01	1.3	2.33
115	A_52_P685021	NM_021704	NM_021704	20315	Cxcl12	-1.2	1.3	2.01	1.17	1.7	2.11	1.04	-1.09	1.2	1.05	-1.1	1.07	1.1	-1.06	1.32	1.23	2.33	1.84	-1.15	-1.03	1.09	1.05	1.02	-1.02	1.02	-1.03	1.56	1.09	1	1.12	2.33
116	A_52_P59124	NM_027836	NM_027836	109225	Ms4a7	-1.1	-1.03	-1.08	1.02	-1.2	-1.34	-1.39	-1.38	1.65	1.05	1.16	2.09	-1.06	1	-1.1	-1.22	1.31	1.38	1.11	1.16	2.01	1.09	2.32	1.72	1.14	-1.06	1.07	1.26	1.19	2.31	2.32
117	A_51_P465281	NM_008495	NM_008495	16852	Lgals1	1	1.11	1.52	1.08	1.6	1.81	1.09	-1.13	1.04	1.19	-1.24	-1.16	1.23	-1.01	1.66	1.23	2.32	1.68	-1.25	-1.2	-1.13	-1.15	-1.09	-1.14	1.16	-1.41	1.2	1.06	1.07	-1.04	2.32
118	A_51_P462428	NM_030166	NM_030166	78754	Galntl2	1.08	-1.53	-1.86	1.07	-1.47	-1.73	-1.42	1.09	-1.46	1.05	1.24	1.1	-1.38	-1.25	-1.87	-1.47	-2.23	-2.31	1.73	1.71	1.42	1.46	1.43	1.56	1.3	-1.04	-1.98	1.17	1.23	-1.06	2.31
119	A_52_P343627	NM_022020	NM_022020	63954	Rbp7	1.14	-1.28	-1.7	-1.25	-1.47	-1.12	-1.35	-1.29	-1.27	1.06	-1.1	-1.38	-1.08	1.53	-1.17	-1.01	-1.31	-1.04	-1.45	-1.03	-1.54	-1.17	-1.18	-1.08	-1.01	-1.5	-2.31	1.15	1.11	-1.18	2.31
120	A_51_P424959	NM_007528	NM_007528	12029	Bcl6b	-1.18	1.16	1.07	1.03	-1.23	-1.12	1.03	1.18	1.11	-1.16	-1.39	-1.3	1.57	1.72	2.29	1.6	1.91	1.65	-1.04	-1.21	-1.04	1.03	-1.14	-1.11	-1.13	1.05	1.08	1.08	1.14	-1.2	2.29
121	A_51_P134228	NM_172563	NM_172563	217082	Hlf	1.12	-1.06	-1.47	1.24	-1.27	-1.57	1.91	1.03	-1.63	-1.05	-1.33	-1.37	1.59	1.1	1.68	1.06	1.75	1.26	1.49	-1.05	2.19	1.03	2.28	1.09	-1.31	-1.35	-1.41	1.12	1.17	-1.07	2.28
122	A_52_P600518	NM_010286	NM_010286	14605	Tsc22d3	1.58	1.03	1.01	1.2	1.32	1.17	2.28	1.53	1.53	1.45	-1.05	1.5	1.44	1.13	1.47	1.25	1.43	1.26	-1.22	-1.59	1.03	-1.25	1.4	-1.32	1.01	1.05	1.01	-1.12	-1.11	-1.06	2.28
123	A_52_P12877	NM_031165	NM_031165	15481	Hspa8	1.25	1.29	1.4	1.07	1	1.38	1.39	1.08	-1.06	1.36	-1.01	1.32	-1.3	-1.36	1.02	-1.38	1.16	-1.11	-2.25	-1.8	-1.85	-2.23	-1.6	-2.27	-1.02	-1.27	-1.41	-1.31	-1.43	-1.42	2.27
124	A_51_P412024	NM_139142	NM_139142	102680	Xtrp3s1	1.02	1.56	1.54	1.15	1.68	1.93	-1.17	-1.16	1.85	1.12	1.26	1.64	1.24	1.06	1.27	1.25	1.82	1.35	1.26	-1.08	1.91	-1.04	2.27	2	1.12	1.29	1.48	-1.03	-1.03	1.75	2.27
125	A_51_P217218	NM_031168	NM_031168	16193	Il6	1.01	1.59	2.26	1.27	1.65	1.66	1.12	-1.08	1.79	1.36	1.1	1.28	1.22	1.05	1.28	1.41	2.13	2.01	1.12	1.08	1.07	1.04	1.04	-1.04	1.02	1.07	1.34	-1	1.08	1.23	2.26
126	A_51_P141926	NM_033648	NM_033648	108017	Fxyd4	-1.33	1.23	1.35	-1.07	1.83	1.54	1.08	1.04	1.87	2.26	1.11	1.2	-1.06	-1.72	1.19	1.16	1.09	-1.07	1.38	1.1	1.58	1.13	1.24	1.38	1.07	1.1	1.78	-1.04	-1.05	1.59	2.26
127	A_52_P559975	NM_009909	NM_009909	12765	Il8rb	1.07	1.62	2.25	1.16	1.79	1.65	1.04	1.02	1.23	-1.09	1.36	-1	-1.08	1.04	1.55	1.36	1.71	1.31	-1.8	-1.54	-1.99	-1.61	-1.86	-1.73	1.2	1.7	1.48	1.26	-1.04	-1.02	2.25
128	A_51_P458258	NM_011888	NM_011888	24047	Ccl19	1.08	1.37	1.63	1.26	1.5	1.46	-1.16	-1.08	1.43	-1.08	1.23	1.38	1.58	1.34	2.25	1.48	2.15	1.48	1.04	1.18	1.54	1.06	1.39	1.62	1.46	1.35	1.93	1.01	-1.15	1.21	2.25
129	A_52_P357587	NM_133227	NM_133227	170762	Nup155	1.21	1.36	1.84	1.36	1.9	1.72	1.16	-1.05	1.26	1.14	1.17	1.19	1.67	1.24	1.35	1.88	1.86	1.79	-1.08	-1.25	-1.2	-1.33	1.05	-1.01	1.26	1.97	2.25	1.1	1.26	1.77	2.25
130	A_51_P295085	NM_008760	NM_008760	18295	Ogn	-1	-1.14	-1.67	-1.12	-1.38	-1.38	-1.14	1.16	-1.15	-1.31	1.04	-1.06	-1.18	1.07	-1.68	-1.22	-2.25	-1.66	1.1	1.13	1.15	1.1	1.23	1.16	-1.16	-1.16	-1.88	-1.13	-1.09	-1.23	2.25
131	A_52_P525348	ENSMUST00000094405		NA		1.02	1.5	2.24	1.07	1.77	1.8	1.14	-1.07	1.14	-1.12	-1	-1.08	-1	-1.03	1.17	1.02	1.62	1.18	1.04	-1.04	1.01	1.02	1.07	1.02	1.1	1.16	2.15	-1.09	-1.09	-1.02	2.24
132	A_51_P509609	NM_053082	NM_053082	64540	Tspan4	1.06	1.04	1.04	1.23	1.04	-1.1	1.76	-1.02	-1.3	-1.06	-1.28	-1.23	1.55	-1.09	1.83	1.04	2.24	1.44	1.1	-1.22	1.51	-1.12	1.67	-1.05	-1.16	-1.22	-1.02	1.04	1.07	-1.1	2.24
133	A_51_P176086	NM_146187	NM_146187	233079	Ffar2	-1.21	1.4	1.56	1.22	1.62	1.42	-1	-1.07	1.4	-1.05	1.24	1.05	1.32	-1.06	2.18	1.56	2.24	1.56	1.01	1.02	1.27	-1.03	1.46	1.28	1.29	1.1	1.57	1.2	1.05	1.17	2.24
134	A_52_P106429	NM_008298	NM_008298	15502	Dnaja1	-1.09	-1.07	1.15	-1.15	-1.14	1.17	2.04	1.31	1.16	1.27	1.06	1.36	1.16	-1.01	1.67	1.17	1.63	1.26	-1.99	-2.21	-1.46	-1.92	-1.35	-2.07	-1.12	-1.25	-1.19	-1.42	-1.54	-1.32	2.21
135	A_51_P487690	NM_133871	NM_133871	99899	Ifi44	-1.23	1.17	1.22	1.1	1.12	1.18	-1.07	-1.11	1.9	-1.07	1.57	2.21	1.1	1.23	1.19	1.14	1.65	1.57	1.16	1.03	1.69	1.05	1.74	1.57	1.21	1.12	1.61	1.06	1.08	1.95	2.21
136	A_51_P199475	NM_145581	NM_145581	233186	Siglecf	-1.05	-1.35	-2.2	-1.4	-2.16	-1.81	-1.2	-1	-1.24	-1.23	-1.16	-1.5	1.09	1.16	-1.16	-1.12	-1.25	-1.38	1.37	1.1	1.11	1.2	1.13	1.44	-1.1	1.17	-1.23	-1.07	-1.17	-1.53	2.2
137	A_51_P364250	NM_172471	NM_172471	209378	Itih5	1.05	-1.57	-1.41	-1.08	-1.27	-1.25	1.03	1.05	-1.01	1.19	-1.04	-1.01	-1.4	-1.23	-1.52	-1.43	-2.2	-1.61	-1.11	-1.05	-1.06	-1.04	-1.14	-1.08	1.54	-1.47	-1.79	1.29	1.09	1.07	2.2
138	A_52_P423247	NM_019840	NM_019840	18578	Pde4b	1.2	1.26	1.07	1.37	1.06	1.18	1.61	1.44	1.35	1.05	-1.48	-1.14	2.14	2.2	1.66	1.9	1.84	1.85	-1.01	-1.39	1.1	1.09	1.15	-1.08	-1.01	1.16	1.16	1.03	-1.08	-1.31	2.2
139	A_51_P279693	NM_009992	NM_009992	13076	Cyp1a1	-1.53	-1.27	-1.92	-1.87	-1.59	-1.72	-1.19	-1.25	-1.23	-1.48	-1.29	-1.44	-1.21	-1.21	-1.12	-1.18	-1.22	-1.42	-1.07	1.09	-1.03	-1.1	-1.01	1	-1.74	-1.28	-2.19	-1.04	-1.12	-1.01	2.19
140	A_52_P577384	NM_010531	NM_010531	16068	Il18bp	-1.06	1.16	1.52	1.12	1.56	1.6	-1.05	-1.06	1.46	-1.05	1.14	1.31	1.24	1.09	1.71	1.21	2.18	1.65	1.01	-1.04	1.36	-1.03	1.28	1.21	1.09	1.1	1.69	-1.08	1.01	1.13	2.18
141	A_51_P324450	NM_029595	NM_029595	76400	Pbp2	-1.18	1.47	1.9	1.1	1.53	2.18	1	-1.01	1.17	1.05	1.15	1.08	-1	1.05	1.37	1.57	1.75	1.23	1.03	-1.15	1.04	-1.08	1.02	1.01	-1.04	1.12	1.57	-1.08	1.02	-1.01	2.18
142	A_51_P105078	NM_011311	NM_011311	20198	S100a4	1.12	1.46	2.04	1.3	1.78	1.59	-1.22	-1.23	1.19	1.34	1.22	1.2	1.07	-1.05	1.48	1.19	2.11	1.68	1.1	1.09	1.19	1.08	1.16	1.18	1.08	1.27	2.16	-1.05	-1.05	1.36	2.16
143	A_52_P49321	BC068142	BC068142	101401	Adamts9	-1.24	1.22	1.47	1.01	1.29	1.72	1.91	1.32	1.17	1	1.15	-1.03	1.29	1.36	2.09	1.26	1.97	1.86	-2.16	-2.09	-1.83	-2.08	-1.75	-2.07	-1.21	1.05	1.08	-1.23	-1.16	-1.33	2.16
144	A_52_P608322	NM_010755	NM_010755	17133	Maff	1.17	-1.01	1.3	1.19	1.32	1.25	2.16	1.54	1.47	1.31	1.24	1.38	1.37	1.1	1.78	1.31	1.5	1.35	-1.22	-1.49	-1.15	-1.2	1.02	-1.28	-1.01	1.14	1.25	-1.01	-1.09	-1.01	2.16
145	A_51_P491742	NM_010931	NM_010931	18140	Uhrf1	-1.03	1.36	1.79	1.3	1.9	2.16	1.09	-1.17	1.2	1.27	-1.03	-1.02	1.23	-1.02	1.38	1.45	2.1	1.75	-1.09	1.04	1.03	1.12	-1.04	-1.08	-1.05	1.16	1.76	1.1	-1.04	1.14	2.16
146	A_51_P124345	NM_153166	NM_153166	240058	Cpne5	1.07	-1.34	-2.06	-1.24	-1.86	-1.95	-1.06	1.12	-1.28	-1	-1.06	-1.34	1.03	1.12	-1.45	-1.18	-2.16	-1.52	1.26	1.19	-1.15	1.25	-1.21	1.1	-1	1.12	-1.35	1.11	1.15	-1.57	2.16
147	A_52_P222775	NM_016693	NM_016693	53608	Map3k6	1.58	1.01	1.13	1.16	1.41	1.3	2.05	1.4	1	1.39	1.48	1.51	1.12	-1.24	2.15	-1.05	1.35	-1.04	-1.49	-1.67	1.09	-1.45	1.37	-1.63	-1.12	-1.2	-1.27	-1.31	-1.51	-1.48	2.15
148	A_51_P178772	NM_144930	NM_144930	234564	AU018778	-1.03	-1.4	-2.11	-1.11	-1.63	-1.7	1.04	-1.02	-1.48	-1.12	-1.02	-1.47	-1.03	-1.47	-1.46	-1.18	-2.15	-1.84	1.21	1.99	1.15	1.56	1.02	1.43	1.59	-1.91	-1.97	1.36	1.14	1.25	2.15
149	A_51_P381060	NM_133209	NM_133209	170741	Pilrb	1.15	1.37	1.56	-1.01	1.2	1.49	-1.08	-1.17	1.06	-1.1	1.04	-1.14	-1	1.04	1.32	1.14	2.14	1.26	-1.02	1.04	-1.05	-1.15	-1.06	1.07	1.53	1.29	1.67	1.1	-1	-1.11	2.14
150	A_51_P149714	NM_026835	NM_026835	68774	Ms4a6d	1.06	1.51	1.75	1.22	1.4	1.5	-1.08	-1.08	1.64	1.29	1.2	1.48	1.11	-1.03	1.46	1.28	2.14	1.59	1.16	-1.1	1.34	-1.08	1.53	1.24	1.14	1.21	1.59	-1.05	-1.06	1.23	2.14
151	A_51_P143893	NM_054098	NM_054098	117167	Steap4	1.03	1.6	2.14	1.27	1.68	2.08	1	-1.02	1.41	1.2	1.26	1.33	1.18	-1.08	1.38	1.42	1.85	1.41	-1.07	-1.08	1.16	-1.03	1.29	1.16	1.26	1.06	1.36	1.08	-1.07	1.23	2.14
152	A_52_P290152	BC066100	BC066100	103012	6720401G13Rik	1.2	1.5	-1.24	-1.08	-1.09	-1.23	-1.3	-1.27	1.02	-1.16	-1.12	-1.11	1.35	1.06	1.36	1.18	1.33	1	2.12	1.25	1.39	1.28	1.49	1.74	1.01	1.07	1.03	-1.06	1.04	1.32	2.12
153	A_51_P494241	NM_007534	NM_007534	12045	Bcl2a1b	-1.16	1.39	1.5	1.08	1.11	1.27	-1.2	-1.13	1.57	1.1	1.28	1.38	1.47	1.12	1.46	1.45	2.12	1.84	1.32	1.3	1.62	1.22	1.81	1.6	1.13	1.5	1.94	1.05	1.02	1.34	2.12
154	A_52_P303891	NM_011584	NM_011584	353187	Nr1d2	1.07	-1.09	-1.36	1.14	-1.32	-1.57	1.39	-1.02	-1.43	-1.13	-1.23	-1.22	1.97	1.24	2.1	1.47	1.96	1.63	1.39	-1.5	1.83	-1.17	1.9	1.01	-1.56	-1.43	-1.47	-1.01	1.01	1.02	2.1
155	A_51_P260683	NM_015811	NM_015811	50778	Rgs1	1.1	1.39	1.55	1.35	1.5	1.31	-1.01	-1.16	2.1	1.3	1.35	2	1.45	1.07	1.17	1.33	1.79	1.63	1.34	1.06	1.34	1.03	1.81	1.41	1.19	1.36	1.64	1.08	1.12	2.05	2.1
156	A_51_P171075	NM_009969	NM_009969	12981	Csf2	-1.13	1.79	2.08	1.34	1.79	1.81	-1.24	-1.19	1.38	-1.18	1.13	1.45	1.15	-1.1	1.83	1.44	2.1	1.23	1.1	-1.16	2.03	-1.14	1.87	1.39	-1.11	1.35	1.9	-1.07	1.02	1.62	2.1
157	A_52_P499499	NM_029021	NM_029021	74614	4833422F24Rik	1.02	1.39	1.72	1.05	1.29	1.42	1.15	-1.04	1.15	2.09	1.07	1.16	1.08	1.01	1.3	1.15	1.61	1.38	1.03	1.02	1.08	1.02	-1.01	-1.01	-1.04	-1.01	1.23	1	1.01	1.09	2.09
158	A_51_P514319	NM_172892	NM_172892	243755	Slc13a4	1.23	-1.06	-1.29	1.07	-1.17	-1.25	-1.12	1.01	-1.01	-1.24	1.06	-1.01	-1.13	-1.13	-1.28	-1.27	-1.89	-2.09	1.27	1.56	1.49	1.48	1.57	1.42	1.08	-1.09	-1.6	1	-1.01	1.03	2.09
159	A_52_P374897	NM_009705	NM_009705	11847	Arg2	1.05	1.63	1.7	1.11	1.61	2.01	-1.05	-1.02	1.21	-1.23	1.01	-1.17	1.1	-1.02	1.33	1.13	2.09	1.29	-1.07	-1.38	1.17	-1.35	1.21	1.03	1.02	1.25	1.38	1	1.01	1.17	2.09
160	A_51_P401797	NM_013599	NM_013599	17395	Mmp9	-1.02	1.4	1.74	1.14	1.49	1.47	1.07	-1.02	1.06	1.04	1.17	-1.07	1.05	1.01	1.04	1.09	1.27	1.36	-1.57	-1.21	-1.88	-1.38	-2.09	-1.65	1.36	1.31	1.3	1.25	1.04	1.09	2.09
161	A_52_P481320	NAP027922-1		NA		1.21	1.27	1.38	1.11	1.05	1.37	1.36	1.09	-1.04	1.32	1.07	1.33	-1.17	-1.26	-1.03	-1.38	1.05	1.06	-2.08	-1.56	-1.78	-1.65	-1.7	-2.06	-1.12	-1.41	-1.44	-1.41	-1.42	-1.35	2.08
162	A_52_P245962	NM_021456	NM_021456	12623	Ces1	-1.07	-1.21	-1.63	-1.07	-1.38	-1.5	-1	-1.03	-1.32	-1.46	-1.18	-1.61	1.14	1.03	-1.1	-1.01	-1.47	-1.34	-1.07	2.07	1.02	1.07	1.03	1.15	1.02	1.08	-1.36	-1	1.04	-1.12	2.07
163	A_51_P211506	NM_146071	NM_146071	224116	Muc20	-1.05	1.33	1.58	1.16	2.07	1.96	1.24	1.28	1.37	1.15	1.04	1.26	-1.15	-1.34	1.2	1.24	1.52	1.4	-1.05	1.25	1.09	1.49	1.02	1.11	-1.2	1.19	2.03	-1.32	-1.51	1.42	2.07
164	A_51_P254262	NM_130858	NM_130858	104079	Nxph3	-1.1	-1.11	-1.19	-1.25	-1.21	-1.18	-1.35	1	-1.11	-1.09	1.06	-1.01	-1.51	1.19	-1.85	1	-2.07	-1.51	1.06	1.21	-1.05	1.21	-1.23	1.11	1.02	1.09	-1.08	1.05	1.01	-1.07	2.07
165	A_51_P227345	NM_007876	NM_007876	13479	Dpep1	1	-1.27	-1.56	-1.12	-1.17	-1.21	-1.18	1.1	-1.01	-1.12	1.07	1.16	-1.11	-1.11	-1.3	-1.22	-2.07	-1.51	1.01	1.1	1.22	1.09	1.29	1.14	-1.21	-1.16	-1.63	-1.06	-1.06	-1.06	2.07
166	A_52_P340669	NM_010800	NM_010800	17341	Bhlhb8	1.04	1.34	2.06	1.03	1.63	1.78	1.18	1.26	1.21	1.04	1.29	1.24	-1.03	-1.38	1.12	-1.03	-1.01	1.19	1.28	1.03	1.02	1.07	1.02	1.07	1.04	-1.1	1.05	1.02	1.02	1.09	2.06
167	A_51_P264132	NM_027789	NM_027789	71406	5430416O09Rik	-1.06	1.11	1.11	-1.12	1.01	1.12	-1.43	-1.04	1.08	-1.02	1.2	1.02	-1.61	1.01	-2.06	-1.31	-2.02	-1.98	1	1.34	-1.2	1.19	-1.25	1.29	1.26	1.55	1.32	-1.02	1.11	1.05	2.06
168	A_51_P246653	NM_020008	NM_020008	56644	Clec7a	1.02	1.63	1.46	1.24	1.39	1.28	-1.45	-1.23	1.89	1.22	1.22	1.5	1.49	1.22	1.48	1.66	1.96	2.05	1.36	1.23	1.66	1.15	2.05	1.68	1.09	1.7	1.9	1.12	1.15	1.66	2.05
169	A_51_P404875	NM_201639	NM_201639	233335	Dmn	-1.02	-1.36	-1.37	-1.08	-1.35	-1.47	1.11	1.1	-1.35	-1.03	1.02	-1.09	-1.18	-1.01	-1.3	-1.4	-2.05	-1.8	-1.03	1.22	-1.14	1.29	-1.26	-1.06	-1.03	1.09	-1.24	-1.07	-1.11	-1.39	2.05
170	A_51_P172292	NM_018746	NM_018746	16427	Itih4	1.19	1.57	1.92	1.33	2.05	1.99	-1.09	-1.08	1.29	-1.06	-1.01	1.29	-1.03	-1.23	1.65	1.19	1.57	1.2	-1.17	-1.15	1.19	-1.07	1.27	1.19	1.09	1.47	2.05	1.06	-1.06	1.36	2.05
171	A_51_P516125	BC013561	BC013561	NA		1.18	-1.15	-1.3	-1.09	-1.22	-1.19	-1.07	1.03	1.08	1.14	1.13	1.14	-1.18	1.07	-1.85	-1.21	-2.05	-1.37	1.22	1.6	-1.09	1.39	-1.01	1.14	1.45	1.1	-1.07	1.09	1.12	1.27	2.05
172	A_52_P631547	BC063103	BC063103	231162	Cyt1	1.27	1.06	-1.19	-1.11	-1.22	-1.31	1.03	1.4	-1.15	1.02	1.22	1.16	-1.1	-1.41	-1.69	-1.33	-1.71	-2.05	-1.02	1.28	-1.03	1.41	1.03	1.24	1.74	-1.11	-1.01	-1.13	-1.35	1.09	2.05
173	A_52_P21459	NM_023056	NM_023056	65963	1810009M01Rik	1.03	1.45	2.01	1.3	2.05	2.04	1.05	1.03	1.22	1.08	1.08	1.18	-1.1	-1.11	1.47	1.17	1.76	1.39	-1.11	-1.02	1.09	-1.2	1.13	1.04	1.09	1.24	1.68	-1.01	-1.07	1.13	2.05
174	A_51_P164686	BC031452	BC031452	81910	Rrbp1	1.01	1.43	1.78	1.19	1.86	1.79	-1.01	-1.1	1.21	1.05	1.03	1.15	1.14	-1.19	1.49	1.13	2.05	1.43	-1.14	-1.12	1.01	-1.05	1.01	-1.08	1.02	1.24	1.97	-1.01	-1.07	1.3	2.05
175	A_51_P182813	A_51_P182813		NA		-1.06	-1.1	1.12	-1.13	-1.16	1.13	2.03	1.31	1.15	1.24	1.06	1.43	1.01	-1.06	1.54	1.09	1.65	1.19	-1.96	-2.04	-1.35	-1.97	-1.31	-1.93	-1.06	-1.26	-1.14	-1.33	-1.46	-1.24	2.04
176	A_51_P346938	NM_029796	NM_029796	76905	Lrg1	1.36	1.54	1.78	1.29	2.03	1.84	-1.09	-1.08	1.26	1.03	-1.02	1.14	-1.04	1.03	1.65	1.45	1.64	1.26	1.09	1.14	1.37	-1	1.33	1.24	1.26	1.25	1.64	1.03	-1.09	1.44	2.03
177	A_51_P241465	NM_146120	NM_146120	227753	Gsn	-1.06	-1.34	-1.72	-1.15	-1.43	-1.51	-1.02	1.12	-1.24	-1.09	-1.04	-1.06	-1.13	-1.01	-1.59	-1.11	-2.02	-1.67	-1.03	-1.05	-1.05	1.03	-1.02	-1.07	-1.11	-1.16	-1.7	-1.07	-1.03	-1.08	2.02
178	A_51_P454949	NM_010359	NM_010359	14864	Gstm3	1.03	-1.24	-1.4	-1.14	-1.18	-1.26	1.03	1.11	-1.18	-1.04	1.08	1.04	-1.11	-1.04	-1.3	-1.01	-2.01	-1.42	-1.02	1.24	1.03	1.26	1.03	1.01	-1.06	-1.2	-1.54	-1.06	-1.12	-1.11	2.01
179	A_52_P515094	NM_025326	NM_025326	66058	0610011I04Rik	-1.09	1.24	1.95	1.24	2.01	2.01	1.07	1.04	1.18	1.06	1.02	1.14	1.13	-1.1	1.51	1.13	1.83	1.58	-1.1	1.12	1.07	1.01	1.07	-1.02	1	1.17	1.71	-1.03	-1.05	1.1	2.01
180	A_51_P262340	BC106176	BC106176	19652	Rbm3	-1.21	1.08	1.22	1.12	1.28	1.14	1.03	-1.21	1.06	-1.18	-1.24	-1.16	1.34	1.03	1.59	1.43	2.01	1.66	1.38	1.05	1.72	-1.08	1.61	1.36	1.03	1.2	1.31	1.06	1.11	1.13	2.01
181	A_51_P488196	NM_028472	NM_028472	73230	Bmper	-1.14	1.24	1.43	-1	1.26	1.36	1.24	1.12	1.01	-1.32	-1.09	-1.12	1.24	1.3	1.8	1.55	2.01	1.43	-1.09	-1.11	1.1	-1.22	1.08	-1.08	-1.08	-1.03	1.39	-1.08	1.03	-1.07	2.01
182	A_52_P555537	AK035703	AK035703	76972	2810008D09Rik	1.48	1.99	-1.2	1.02	-1.09	-1.29	-1.39	-1.32	-1.17	-1.18	-1.01	-1.13	1.73	1.1	1.63	1.21	1.6	1.12	2.01	1.21	1.18	1.06	1.23	1.45	1.2	1.22	1.11	-1.05	-1.06	1.48	2.01
183	A_51_P387591	NM_030612	NM_030612	80859	Nfkbiz	1.04	1.7	2.01	1.4	1.81	1.66	-1.3	-1.19	1.37	-1.03	1.25	1.49	1.15	-1.1	1.28	1.22	1.59	1.42	1.34	1.13	1.33	1.16	1.46	1.33	1.06	1.33	1.78	-1.08	1.07	1.43	2.01
184	A_52_P413034	NM_008398	NM_008398	16404	Itga7	1.35	1.7	2.01	1.17	1.66	1.64	-1.06	1	1.35	1.3	1.03	1.25	-1.17	-1.15	1.04	1.08	1.33	1.29	1.11	1.06	1.19	1.11	1.07	1.01	1.03	-1.13	1.12	-1.02	-1.03	1.2	2.01
185	A_51_P106538	NM_030127	NM_030127	78558	Htra3	1.24	-1.22	-1.17	-1.08	-1.22	1.02	-1.16	1.07	-1.19	1.09	1.01	-1.03	-1.6	-1.04	-2.01	-1.35	-1.64	-1.59	1.08	1.22	-1.02	1.27	-1.16	1.14	1.26	-1.5	-1.58	1.08	1	1.06	2.01
186	A_51_P419226	NM_025393	NM_025393	66166	S100a14	1.03	1.11	1.23	1.17	1.33	1.36	-1.09	-1.11	1.1	-1.01	-1.24	-1.41	-1.12	-1.21	1.21	1.15	1.57	1.12	1.03	-1.04	1.03	-1.03	-1.24	1.05	-1.08	1.11	2	-1.06	1.1	1.27	2
187	A_52_P650553	NM_001039710	NM_001039710	67876	1500041J02Rik	1.16	-1	-1.01	1.3	1.02	1	1.86	1.46	1.51	1.11	-1.17	1.02	1.56	1.32	2	1.41	1.98	1.8	-1.11	-1.49	1.19	-1.17	1.2	-1.21	-1.39	-1.1	-1.01	-1.01	-1	-1.02	2
188	A_52_P627816	NM_019984	NM_019984	21816	Tgm1	1.7	1.51	2	1.37	1.58	1.95	-1.1	-1.12	1.44	1.29	1.21	1.2	1.12	1.15	1.37	1.48	1.61	1.27	1.04	-1.07	1.29	1.05	1.28	1.31	1.14	1.2	1.57	1	1.06	1.33	2
189	A_51_P287100	NM_007663	NM_007663	12556	Cdh16	-1.13	-1.11	-1.84	-1.05	-1.89	-2	-1.08	-1.09	-1.2	-1.14	-1.2	-1.62	-1.1	1.19	-1.2	-1.1	-1.32	-1.31	1.1	-1.03	1.05	-1.1	-1.13	1.2	-1.09	1.29	-1.37	1.01	1.28	-1.45	2
190	A_51_P272106	NM_007705	NM_007705	12696	Cirbp	-1.43	-1.24	-1.41	-1.24	-1.2	-1.55	-1.59	-1.32	-1.05	-1.48	-1.37	-1.42	1.44	1.1	-1.31	1.21	-1.18	1.09	2	1.73	1.54	1.73	1.45	1.83	1.21	1.29	1.19	1.33	1.45	1.32	2
191	A_51_P258098	NM_025326	NM_025326	66058	0610011I04Rik	-1.06	1.29	1.86	1.3	1.92	2	1.06	1.06	1.22	1.01	1.02	1.1	-1.01	-1.03	1.57	1.24	1.93	1.47	-1.06	1.1	1.16	-1.25	1.15	1.04	1.17	1.38	1.8	-1.01	-1.09	1.11	2
192	A_52_P195839	NM_009982	NM_009982	13032	Ctsc	-1.17	1.11	1.38	1.05	1.24	1.36	-1.12	-1.19	1.31	-1	-1.01	1.24	1.12	1.27	1.36	1.42	2	1.47	1.14	1.11	1.62	1.04	1.7	1.49	-1.03	1.51	1.89	1.04	1.09	1.4	2
193	A_51_P455157	NM_146189	NM_146189	233199	Mybpc2	1.88	1.47	1.99	1.17	1.98	1.86	1.07	-1.06	1.19	1.33	1.16	1.01	1.02	1.07	1.6	1.33	1.99	1.46	-1.16	-1.09	1.13	-1.21	-1	1.1	1.02	1.3	1.78	1.04	1.09	1.18	1.99
194	A_51_P170371	NM_031165	NM_031165	15481	Hspa8	1.23	1.13	1.33	1.11	1.01	1.32	1.54	1.2	-1.01	1.37	1.15	1.37	-1.23	-1.15	1.13	-1.19	1.23	-1.07	-1.99	-1.46	-1.55	-1.71	-1.55	-1.88	-1.08	-1.23	-1.26	-1.3	-1.43	-1.25	1.99
195	A_51_P473498	NM_173398	NM_173398	229323	Gpr171	1.12	1.33	1.23	1.17	1.29	1.42	1.2	1.08	1.99	1.25	1.14	1.33	1.4	1.14	1.12	1.28	1.87	1.53	1.21	-1.06	1.13	1.01	1.22	1.23	1.16	1.22	1.48	1.01	-1.04	1.18	1.99
196	A_51_P263965	NM_010442	NM_010442	15368	Hmox1	1.19	1.34	1.87	1.23	1.94	1.55	-1.04	-1.12	1.13	1.03	-1	1.03	1.16	-1.13	1.54	1.14	1.88	1.56	1	1.14	1.08	1.05	1.02	1	1.08	1.31	1.99	1.04	1.1	1.15	1.99
197	A_52_P205695	NM_027334	NM_027334	70152	Mettl7a	1.08	-1.14	-1.61	-1.01	-1.33	-1.31	-1.05	1.21	-1.08	-1.01	1.09	1.02	1.06	1.01	-1.28	-1.08	-1.32	-1.42	-1.08	1.01	-1.12	-1.07	1.03	-1.03	-1.11	-1.25	-1.99	-1.12	1	-1.19	1.99
198	A_52_P116134	NM_009656	NM_009656	11669	Aldh2	-1.02	-1.05	-1.16	-1.12	-1.14	-1.02	1.05	1.15	-1.13	1.05	-1.06	-1	1.1	-1.07	-1.11	-1.1	-1.11	-1.05	-1.21	1.08	-1.19	-1.01	-1.12	-1.14	-1.04	-1.45	-1.98	-1.18	-1.04	-1.41	1.98
199	A_52_P218537	NM_016884	NM_016884	15381	Hnrpc	-1.03	-1.14	1.07	-1.03	1.03	1.23	1.02	-1.03	-1.02	1.11	-1.06	1.09	-1.15	-1.23	-1.27	-1.27	-1.29	-1.04	-1.86	-1.44	-1.98	-1.31	-1.82	-1.82	-1.12	-1.1	-1.08	1.01	-1.09	-1.16	1.98
200	A_52_P1067534	AK088332	AK088332	NA		-1.12	1.01	1.2	-1.19	1.04	1.27	-1.11	-1.02	1.19	1.04	1.28	1.13	-1.83	-1.19	-1.72	-1.46	-1.98	-1.69	-1.21	1.41	-1.35	1.19	-1.48	-1.03	1.22	1.21	1.04	-1.07	-1.09	-1.24	1.98
201	A_52_P40345	NM_028104	NM_028104	72112	Ppp1r14d	-1.09	1.19	1.54	1.15	1.73	1.78	-1.16	1.11	1.15	1.06	1.05	-1.01	-1.2	-1.17	1.05	1.2	1.12	1.06	1.08	1.16	-1.04	1.05	-1.08	1.19	1.09	1.4	1.97	-1.07	-1.1	1.64	1.97
202	A_51_P184928	NM_028968	NM_028968	74482	Ifitm7	1.02	1.33	1.78	1.13	1.53	1.67	1.02	-1.12	1.19	-1.01	1.05	1.28	1.31	1.08	1.71	1.13	1.97	1.76	-1.15	1.07	1.1	1.06	1.11	1.08	1.07	1.06	1.46	-1.07	-1.05	1.12	1.97
203	A_52_P126158	NM_008326	NM_008326	15944	Irgm	-1.3	-1.06	1.15	-1.02	-1.04	1.07	-1.05	-1.09	1.36	-1.14	1.04	1.48	1.36	1.25	1.33	1.36	1.97	1.41	1.01	-1.03	1.42	-1.05	1.47	1.33	1.22	1.11	1.17	-1.09	-1.18	1.09	1.97
204	A_52_P63343	NM_001033302	NM_001033302	229599	Gm129	1.22	1.14	-1.22	1.14	-1.08	-1.36	1.96	1.01	1.06	1.11	-1	-1.06	1.13	1.05	1.13	1.04	1.19	1.02	1.03	-1.11	1.06	-1.03	1.18	1.02	-1.08	-1.09	-1.02	1.03	-1.06	-1.03	1.96
205	A_51_P309307	ENSMUST00000062945	BC027668	NA		1.17	1.44	1.9	1.24	1.96	1.72	1.19	1.09	1.54	1.37	1.11	1.39	1.02	-1.05	1.17	1.19	1.7	1.44	1.09	1.09	1.19	1.05	1.11	-1.06	-1.17	-1.06	1.19	-1	-1.01	1.25	1.96
206	A_51_P479311	NM_010358	NM_010358	14862	Gstm1	1.04	-1.25	-1.51	-1.24	-1.27	-1.35	1.06	1.19	-1.19	-1.03	1.09	1.02	-1.5	-1.1	-1.42	-1.08	-1.96	-1.83	-1.02	1.29	1.05	1.07	1.07	1.08	1.08	-1.07	-1.46	-1	-1.1	-1.05	1.96
207	A_52_P49601	NM_010239	NM_010239	14319	Fth1	-1	1.26	1.57	1.02	1.41	1.43	1.06	-1.02	1.3	-1.02	1.03	1.15	1	1.18	1.5	1.3	1.96	1.33	-1.06	-1.04	1.13	-1.16	1.29	1.07	1.16	1.23	1.42	-1.06	-1.11	-1.03	1.96
208	A_51_P146753	NM_007781	NM_007781	12984	Csf2rb2	1.04	1.4	1.35	1.15	1.21	1.3	-1.14	-1.23	1.43	1.07	1.14	1.28	1.07	1.04	1.36	1.23	1.96	1.39	1.16	1.04	1.35	-1.11	1.56	1.33	1.34	1.36	1.34	1.23	-1.01	1.14	1.96
209	A_52_P545613	NM_010187	NM_010187	14130	Fcgr2b	1.04	1.13	1.37	1.03	1.18	1.28	1.14	1.02	1.31	1.63	1.18	1.4	1.04	-1.02	1.14	1.23	1.96	1.39	-1.02	-1.06	1.15	-1.11	1.33	1.06	1.22	1.11	1.32	1.05	1.02	1.15	1.96
210	A_52_P500027	NM_017373	NM_017373	18030	Nfil3	1.06	1.12	1.33	1.05	1.2	1.53	1.1	1.24	1.96	1.31	1.27	1.46	-1.22	-1.19	-1.36	-1.26	-1.15	-1.07	-1.15	1.14	-1.4	1.07	-1.36	-1.14	1.24	1.16	1.23	-1.2	-1.28	1.01	1.96
211	A_52_P507214	NM_013599	NM_013599	17395	Mmp9	-1.02	1.26	1.52	1.05	1.18	1.2	1.16	1.05	1.09	1.17	1.2	1.01	-1.01	-1.05	-1.07	1.02	1.22	1.24	-1.56	-1.27	-1.81	-1.36	-1.96	-1.63	1.21	1.13	1.09	1.13	1.01	1.02	1.96
212	A_51_P268983	XM_144099	XM_144099	242702	Myom3	1.48	-1.2	-1.25	-1.1	-1.37	-1.1	-1.41	-1.12	1.01	1.35	1.12	-1.06	-1.27	-1.13	-1.95	-1.23	-1.71	-1.65	1.37	1.52	1.15	1.39	1.13	1.41	1.1	1.28	1.07	1.13	1.21	1.2	1.95
213	A_51_P436878	NM_018820	NM_018820	55942	Sertad1	1.01	-1.01	1.1	1.2	1.1	-1.05	1.23	1.26	1.33	1.02	-1.34	-1.05	1.42	1.41	1.95	1.17	1.65	1.5	-1.2	-1.36	1.03	-1.03	1.02	-1.23	-1.39	-1.19	-1.04	1.18	1.16	-1.12	1.95
214	A_52_P133594	NM_009778	NM_009778	12266	C3	-1.07	1.02	1.7	1.29	1.8	1.95	-1.2	-1.14	1.08	1.01	-1.09	1.04	-1.31	-1.37	1.07	-1.34	1.46	1.05	1.05	-1.19	1.2	-1.37	1.05	1.1	1.18	1.02	1.33	1.13	1.1	1.01	1.95
215	A_51_P139069	NM_172372	NM_172372	54636	Wdr45	-1.07	-1.06	-1.3	-1.06	-1.16	-1.23	-1.33	-1	-1.03	-1.13	1.04	-1.08	-1.4	1.01	-1.95	-1.2	-1.8	-1.55	1.07	1.19	-1.1	1.09	-1.31	1.12	1	1.11	-1.08	1.02	1.08	-1.11	1.95
216	A_52_P267564	NM_172728	NM_172728	231991	Creb5	-1.17	-1.15	1.07	-1.05	-1.04	-1.11	1.95	1.34	1.18	1.16	1.05	1.22	1.22	1.1	1.44	1.23	1.27	1.42	-1.3	-1.29	-1.02	-1.1	-1.04	-1.25	-1.03	-1.05	-1.01	-1.19	-1.19	-1.06	1.95
217	A_51_P374571	NM_008344	NM_008344	16012	Igfbp6	-1.03	-1.32	-1.38	-1.01	-1.15	-1.22	-1.03	1.12	-1.27	1.09	-1.05	-1.03	-1.13	-1.02	-1.37	-1.21	-1.95	-1.35	1.1	1.1	1.02	1.07	-1.13	1.01	-1.09	-1.31	-1.79	1.12	1.14	-1.35	1.95
218	A_52_P232813	NM_203320	NM_203320	330122	Gm1960	1.03	1.58	1.94	1.19	1.71	1.9	1.08	-1.08	1.37	1.14	1.11	1.36	1.11	-1.06	1.27	1.43	1.47	1.33	1.03	1.02	1.24	-1.04	1.15	1.15	1.03	1.23	1.58	-1.03	1	1.28	1.94
219	A_52_P485573	NM_153484	NM_153484	21685	Tef	1.21	-1.01	-1.31	1.17	-1.16	-1.55	1.6	-1.01	-1.47	-1.09	-1.23	-1.18	1.61	-1.14	1.85	1.06	1.89	1.23	1.28	-1.26	1.81	-1.18	1.93	1.01	-1.5	-1.43	-1.55	-1.03	-1.13	-1.19	1.93
220	A_52_P674808	ENSMUST00000074660	BC066832	NA		-1.17	-1.16	-1.72	-1.06	-1.48	-1.4	1.01	1.14	-1.21	-1.24	1.05	-1.27	-1.02	1.38	-1.47	-1.16	-1.86	-1.22	-1.12	1.1	-1.03	1.01	-1.1	-1.07	1.22	-1.3	-1.93	1.12	1.16	-1.27	1.93
221	A_52_P26991	BC050903	BC050903	13175	Dcamkl1	-1.11	1.25	1.79	1.21	1.67	1.67	1.07	-1.1	1.25	1.16	-1.02	1.14	1.01	-1.02	1.66	1.21	1.93	1.58	-1.13	-1.06	1.13	-1.08	-1.02	-1.06	1.09	1.09	1.46	1.08	1.17	1.29	1.93
222	A_52_P11441	NM_173781	NM_173781	270192	Rab6b	-1.05	-1.2	-1.42	-1.2	-1.29	-1.24	1.11	1.13	-1.24	1.08	1.06	-1.08	-1.46	-1.04	-1.44	-1.25	-1.92	-1.64	1.2	1.2	-1.07	-1.04	1.02	1.15	1.15	1.03	-1.41	-1.13	-1.06	-1.46	1.92
223	A_52_P437421	NM_028472	NM_028472	73230	Bmper	-1	1.2	1.46	-1.05	1.19	1.29	1.15	-1.01	-1.08	-1.3	-1.21	-1.19	1.26	1.27	1.68	1.45	1.92	1.36	-1.04	-1.18	1.11	-1.19	1.09	-1.07	-1	1.1	1.25	-1.09	1.01	-1.14	1.92
224	A_51_P515883	NM_139198	NM_139198	231507	Plac8	-1.07	1.18	1.29	-1.05	-1.16	1.14	-1.42	-1.41	1.24	-1.08	1.02	-1.02	1.2	1.34	1.24	1.27	1.92	1.6	1.18	1.2	1.29	1.09	1.23	1.4	1.32	1.08	1.25	1.12	-1.02	-1.03	1.92
225	A_51_P443508	NM_026438	NM_026438	67895	Ppa1	1.15	1.45	1.77	1.19	1.78	1.92	1.03	1.05	1.28	1.12	1.18	1.26	-1.1	-1.19	1.21	1.05	1.39	1.23	-1.25	-1.11	-1.02	-1.27	-1.07	-1.12	1.36	-1.18	1.17	-1.05	-1.05	1.17	1.92
226	A_52_P474528	NAP066348-1		NA		1.41	1.26	1.66	1.9	1.92	1.68	1.23	1.09	1.03	1.39	1	1.07	1.03	-1.08	1.18	-1.38	1.52	1.45	-1.26	-1.54	-1.39	-1.67	-1.74	-1.59	1.09	-1.29	-1.08	1.32	1.39	-1.04	1.92
227	A_52_P228236	NM_011638	NM_011638	22042	Tfrc	1.02	1.27	1.63	1.12	1.49	1.78	1.06	1.05	1.18	1.09	1.07	1.04	1.12	-1.02	1.32	1.29	1.91	1.62	1.03	1.09	1.1	1.1	1.05	1.01	1.07	1.31	1.7	-1.1	-1.03	1.15	1.91
228	A_51_P489720	NM_153081	NM_153081	216867	Slc16a11	-1.08	-1.2	-1.66	-1.26	-1.49	-1.83	1.09	1.2	-1.07	-1.02	1.01	1.09	-1.12	-1.33	-1.72	-1.09	-1.91	-1.52	1.3	1.4	1.28	1.58	1.2	1.38	-1.04	-1.25	-1.14	-1.01	-1.35	1.39	1.91
229	A_51_P247694	NM_173036	NM_173036	54672	Gpr97	1.04	1.23	1.2	-1	1.07	1.09	1.1	1.02	1.05	-1.02	1.07	-1.04	1.39	1.33	1.91	1.35	1.84	1.35	1.13	-1.03	1.11	1.08	1.23	1.25	1.03	1.23	1.23	-1.05	-1.06	1.01	1.91
230	A_52_P414065	NM_145137	NM_145137	216864	Mgl2	-1.08	1.18	1.52	1.16	1.61	1.91	1.01	1.11	-1.05	1.29	1.08	-1	-1.08	-1.03	1.3	1.07	1.39	1.11	-1.11	-1.07	-1.1	-1.12	-1.07	1.05	1.2	1.44	1.58	1.12	1.14	-1.01	1.91
231	A_51_P251357	NM_016748	NM_016748	51797	Ctps	-1.08	1.41	1.78	1.03	1.5	1.65	1.22	1.09	1.52	1.2	1.11	1.32	1.08	1.17	1.67	1.47	1.91	1.59	-1.24	-1.52	1.09	-1.33	1.11	-1.15	-1.13	1.03	1.49	-1.21	-1.08	1.2	1.91
232	A_52_P75441	ENSMUST00000030808	AK019885	NA		1.01	1.54	1.91	1.15	1.58	1.62	1.13	-1.06	1.22	1.15	-1.02	1.26	1.08	-1.02	1.21	1.34	1.43	1.53	-1.02	-1.07	1.12	-1.06	1.06	-1.1	1.01	1.02	1.17	-1.04	1.01	1.07	1.91
233	A_51_P469433	NM_011659	NM_011659	22163	Tnfrsf4	1.01	1.18	1.17	1.08	1.14	-1.06	-1.05	-1.14	1.42	1.09	1.24	1.51	1.03	-1.06	1.18	1.11	1.43	1.02	1.39	1.23	1.77	-1.09	1.9	1.86	1.29	1.26	1.38	1.08	-1.01	1.8	1.9
234	A_51_P273609	NM_146125	NM_146125	228550	Itpka	-1.2	-1.46	-1.73	-1.24	-1.39	-1.43	-1.18	1.13	-1.09	1.05	1.12	1.15	-1.08	-1.25	-1.62	-1.15	-1.9	-1.36	1.19	1.28	1.11	1.43	-1.02	1.17	-1.07	-1.14	-1.15	-1.03	-1.16	1.36	1.9
235	A_51_P143162	NM_080728	NM_080728	140781	Myh7	-1.1	-1.5	-1.9	-1.25	-1.75	-1.64	-1.15	1.03	-1.19	1.06	-1.02	-1.24	-1.31	1.02	-1.37	-1.33	-1.34	-1.72	1.05	1.04	1.02	-1.17	-1.14	1.09	1.06	1.3	-1.17	1.25	1.37	-1.04	1.9
236	A_52_P102931	AK087160	AK087160	317757	Gimap5	1.11	1.23	-1.01	-1	1.02	-1.04	-1.57	-1.32	-1.13	-1.33	-1	-1.38	1.39	1.25	1.03	1.38	1.32	1.03	1.71	1.41	1.19	1.06	1.4	1.9	1.81	1.78	1.74	1.17	1.3	1.27	1.9
237	A_51_P305770	NM_145158	NM_145158	246707	Emilin2	1.65	1.28	1.7	1.12	1.39	1.7	1.17	-1.14	1.05	1.9	1.07	1.23	1.04	-1.15	1.19	1.05	1.74	1.29	-1.33	-1.03	-1.39	-1.19	-1.27	-1.26	1.36	-1.22	1.06	1.23	1.02	-1.02	1.9
238	A_52_P559919	NM_011163	NM_011163	19106	Eif2ak2	-1.08	1.31	1.34	1.08	1.18	1.14	-1.23	-1.15	1.52	-1.13	1.09	1.41	1.3	1.1	1.48	1.13	1.9	1.6	1.02	1	1.33	1.06	1.23	1.19	1.02	1.03	1.29	-1.04	1.1	1.5	1.9
239	A_52_P299771	NM_007535	NM_007535	12046	Bcl2a1c	-1.04	1.37	1.43	-1.01	1.06	1.26	-1.06	-1.09	1.35	1.08	1.22	1.29	1.11	-1.44	1.13	1.16	1.89	1.49	1.17	1.09	1.3	1.01	1.54	1.24	1.13	1.35	1.54	-1.11	-1.16	1.04	1.89
240	A_51_P401501	AK021320	AK021320	77522	D630002J15Rik	1.03	1.15	1.25	-1.12	1.07	1.2	1.39	1.39	1.09	1.89	1.07	-1.04	-1.11	-1.11	1.04	1.12	-1.07	-1.16	1.02	-1.26	-1.24	-1.16	-1.35	-1.14	1.08	1.21	1.5	-1.12	-1.12	-1.19	1.89
241	A_51_P303160	NM_007482	NM_007482	11846	Arg1	1.45	1.52	1.73	-1.02	1.3	1.78	1.06	-1.09	1.08	1.64	1.03	-1.18	1.08	1.03	1.18	1.39	1.89	1.68	1.07	-1.05	-1.09	-1.05	-1.01	1.03	1.05	1.01	1.26	-1.04	-1.05	-1.02	1.89
242	A_51_P419768	NM_009061	NM_009061	19735	Rgs2	-1.89	-1.37	-1.22	-1.16	-1.26	-1.19	-1.01	-1.42	-1.37	-1.37	1.08	-1.28	1.2	-1.75	-1.7	-1.1	-1.32	-1.41	1.44	1.31	-1.06	1.05	1.25	1.19	1.1	-1.07	-1.16	-1.01	1.04	1.13	1.89
243	A_51_P208240	NM_019418	NM_019418	50930	Tnfsf14	-1.16	1.25	1.57	1.07	1.43	1.26	-1	1.01	1.13	-1.02	1.27	1.15	1.05	-1.1	1.16	1.06	1.89	1.17	-1.24	-1.07	-1.17	-1.11	-1.16	-1.15	1.11	1.3	1.46	1.03	-1.07	1.03	1.89
244	A_51_P465758	BC006619	BC006619	66873	1200009O22Rik	1.08	1.09	-1.61	-1.26	-1.51	-1.43	-1.62	-1.11	-1.63	-1.46	1.03	-1.44	-1.24	-1.03	-1.49	-1.27	-1.57	-1.88	1.13	1.12	-1.14	1.02	-1.16	1.13	1.11	1.23	-1.16	-1.08	1.03	-1.16	1.88
245	A_51_P180091	NM_028775	NM_028775	74134	Cyp2s1	1.01	-1.24	-1.48	-1.17	-1.29	-1.43	-1.04	1.14	-1.24	1.09	1.08	1.13	-1.39	-1.45	-1.61	-1.29	-1.88	-1.47	1.22	1.25	1.11	1.33	-1.07	1.1	-1.13	-1.16	-1.02	-1.01	-1.2	1.35	1.88
246	A_51_P446469	NM_010071	NM_010071	13449	Dok2	1.13	1.29	1.67	1.09	1.63	1.79	1.07	-1.14	1.02	1.4	1.09	1.09	1.03	-1.25	1.35	1.1	1.84	1.39	1.06	1.08	-1.06	-1.02	1.01	1.05	1.43	1.22	1.88	-1.07	-1.1	1	1.88
247	A_51_P173043	NM_010118	NM_010118	13654	Egr2	-1.14	1.15	1.2	1.14	1.24	1.27	1	-1.08	1.59	1.12	1.02	1.23	1.62	1.31	1.41	1.88	1.35	1.78	1.15	-1.05	1.17	1.15	1.49	1.26	1.08	1.51	1.66	-1.01	1.06	1.15	1.88
248	A_52_P1020860	AK153119	AK153119	107350	AW112010	-1.01	1.4	1.6	1.33	1.78	1.67	1.04	1.06	1.3	-1.05	1.21	1.17	1.11	1.02	1.46	1.27	1.64	1.31	1.07	1.21	1.27	1.07	1.32	1.41	1.06	1.31	1.88	-1.07	-1.09	1.15	1.88
249	A_51_P268439	NM_023061	NM_023061	84004	Mcam	-1.08	1.14	1.29	1.16	1.17	1.16	1.18	1.17	1.01	1.11	1.18	1	1.68	1.31	1.87	1.45	1.6	1.63	-1.19	-1.12	-1.16	1.02	-1.12	-1.19	1	1.08	1.22	-1.02	-1.08	-1.1	1.87
250	A_51_P212491	NM_133232	NM_133232	170768	Pfkfb3	1.18	1.03	-1.12	1.19	-1.05	-1.22	1.34	1.07	-1.16	-1.07	-1.23	-1.08	1.68	1.21	1.87	1.19	1.64	1.3	1.03	-1.28	1.48	-1.12	1.54	-1.1	-1.29	-1.45	-1.42	1.11	-1.03	-1.06	1.87
251	A_51_P160544	NM_021474	NM_021474	58859	Efemp2	-1.12	1.1	1.33	1.12	1.3	1.23	1.17	-1.02	1.09	1.05	-1.14	-1.04	1.25	1.16	1.63	1.29	1.87	1.62	1.02	1.05	1.06	-1.05	1.07	1.01	-1.13	1.14	1.64	1.13	1.07	1.14	1.87
252	A_51_P192783	AK003900	AK003900	68597	1110021J02Rik	-1.04	1.19	1.63	1.1	1.6	1.69	1.06	1.05	1.11	1.07	-1.02	-1.02	-1.04	-1.03	1.38	1.09	1.87	1.32	1.01	1.13	-1.01	1.01	-1.1	1.04	1.05	1.14	1.77	1.05	1.07	1.04	1.87
253	A_51_P383489	NM_021891	NM_021891	60530	Fignl1	-1.14	1.25	1.53	1.09	1.36	1.47	1.04	-1.2	1.08	1.17	-1.03	-1.07	1.22	1.08	1.23	1.38	1.74	1.85	-1.04	1.07	1	1.13	-1.19	-1.12	-1.06	1.16	1.72	-1.02	-1.02	1.12	1.85
254	A_51_P424550	NM_194333	NM_194333	22626	Slc23a3	1.07	1.19	1.4	1.2	1.44	1.42	-1.13	-1.18	1.04	-1.07	-1.26	-1.22	1.03	-1.1	1.39	1.19	1.85	1.37	1.29	-1.12	1.36	-1.02	1.08	1.17	-1.09	-1.11	1.28	1.11	1.2	1.34	1.85
255	A_52_P384394	NM_138313	NM_138313	171543	Bmf	1.02	-1.01	-1.09	1.04	-1.05	-1.1	-1.28	-1.31	-1.06	-1.01	1.19	1.07	-1.03	-1.39	-1.84	-1.42	-1.45	-1.45	1.38	1.4	1.25	1.33	1.28	1.33	1.08	1.24	1.07	1.12	1.15	1.25	1.84
256	A_51_P311958	NM_013623	NM_013623	18407	Orm3	1.04	1.26	1.84	1.11	1.42	1.42	1.09	1.15	1.19	1.03	1.32	1.31	1.02	1.03	1.09	1.04	1.27	-1.06	1.09	1.11	1.13	1.21	1.16	1.16	-1.06	-1.13	1.2	1.08	-1.03	-1.01	1.84
257	A_51_P128876	NM_025378	NM_025378	66141	Ifitm3	-1	1.21	1.56	1.16	1.46	1.51	-1.03	-1.11	1.2	-1.09	1.02	1.27	1.11	1.1	1.53	1.14	1.84	1.5	-1.14	1.02	1.16	-1.02	1.16	1.14	1.12	1.13	1.54	-1.05	-1.02	1.14	1.84
258	A_51_P469449	NM_011677	NM_011677	22256	Ung	1.1	1.53	1.76	1.15	1.68	1.75	1.04	-1.15	1.17	1.26	1.11	-1.02	1.21	-1.1	1.18	1.21	1.61	1.58	1.12	1.26	1.08	1.2	-1.05	1.11	1.08	1.32	1.84	1.05	1.07	1.15	1.84
259	A_51_P335000	NM_010211	NM_010211	14199	Fhl1	1.09	-1.22	-1.53	-1.19	-1.4	-1.36	-1	1.08	-1.12	-1.03	1.02	-1.04	-1.08	1.04	-1.24	-1.11	-1.84	-1.54	1.11	-1.11	1.06	-1.1	1.07	1.04	-1.15	-1.02	-1.41	-1.12	-1.03	-1.15	1.84
260	A_51_P440535	AK018636	AK018636	74568	Mlkl	-1.1	1.24	1.32	1.12	1.21	1.32	-1.1	-1.19	1.27	-1.11	1.05	1.11	1.29	1.09	1.46	1.23	1.83	1.54	1.04	1	1.14	1.01	1.24	1.16	-1.06	-1.01	1.34	-1.02	1.08	1.22	1.83
261	A_51_P516133	NM_015786	NM_015786	50708	Hist1h1c	1.24	-1.07	-1.25	-1	-1.14	-1.15	-1.13	1.01	1.03	1.11	1.16	1.1	-1.02	1.14	-1.71	-1.13	-1.83	-1.25	1.24	1.56	-1.05	1.32	1.05	1.2	1.29	1.06	-1.11	1.11	1.13	1.32	1.83
262	A_51_P367310	NM_028083	NM_028083	110749	Chaf1b	-1.06	1.28	1.47	1.19	1.55	1.48	-1.01	-1.2	1.26	1.04	-1.1	-1.11	-1.23	1.05	1.05	1.2	1.55	1.21	1.17	1.09	1.29	1.05	1.23	1.21	1.12	1.42	1.83	1.22	1.22	1.13	1.83
263	A_52_P263658	NM_008236	NM_008236	15206	Hes2	-1.03	-1.34	-1.66	-1.26	-1.71	-1.78	-1.34	-1.09	-1.74	-1.18	-1.03	-1.3	1.02	1.07	-1.46	-1.29	-1.83	-1.72	1.13	1.18	-1.16	1.04	-1.31	1.1	1.05	-1.01	-1.25	1.04	1.07	-1.23	1.83
264	A_52_P799815	NM_001025606	NM_001025606	380863	Gm905	-1.06	1.21	1.38	1	1.35	1.58	-1.39	-1.12	1.3	1.06	1.29	1.53	-1.39	-1.17	-1.7	-1.11	-1.83	-1.17	1.05	1.43	-1.11	1.36	-1.31	1.26	1.27	1.43	1.49	-1.03	1.08	1.27	1.83
265	A_51_P143103	BC066048	BC066048	226169	Pprc1	-1.08	1.01	1.19	-1.09	-1.03	1.09	1.43	1.36	1.22	1.01	1.02	1.12	1.27	1.24	1.83	1.37	1.56	1.48	-1.24	-1.48	1.02	-1.25	1.05	-1.23	-1.3	-1.17	-1.08	-1.13	-1.21	1.01	1.83
266	A_51_P225665	NM_010784	NM_010784	17242	Mdk	-1.06	1.12	1.24	1.07	1.05	1.02	1.13	-1.03	1.21	-1.05	-1.05	1.04	1.55	1.33	1.6	1.22	1.82	1.35	-1.12	-1.1	1.1	-1.19	1.07	-1.01	-1.06	1	1.16	1.14	1.09	1.22	1.82
267	A_52_P415215	NM_010358	NM_010358	14862	Gstm1	1.11	-1.04	-1.18	-1.01	-1.04	-1.06	1.03	1.15	-1.16	-1.06	-1	1.05	-1.24	-1.14	-1.36	-1.13	-1.82	-1.48	-1.18	1.16	-1.11	1.14	-1.02	-1.05	1.01	-1.25	-1.53	-1.09	-1.19	-1.05	1.82
268	A_51_P408595	NM_016960	NM_016960	20297	Ccl20	1.05	1.49	1.57	1.36	1.54	1.82	-1.04	1.01	1.24	1.17	1.36	1.62	1.17	1.04	1.28	1.38	1.61	1.3	1.26	1.16	1.27	1.21	1.32	1.39	1.02	1.28	1.52	-1.05	-1.07	1.3	1.82
269	A_51_P449325	NM_008206	NM_008206	15001	H2-Oa	-1.12	-1.05	-1.36	-1.15	-1.61	-1.51	-1.45	-1.33	-1.17	-1.18	-1	-1.25	-1.01	-1.08	-1.82	-1.16	-1.29	-1.27	1.33	1.5	1.38	1.3	1.23	1.62	1.46	1.08	-1.14	1.24	1.09	-1	1.82
270	A_51_P308844	NM_153529	NM_153529	68404	Nrn1	-1.16	-1.44	-1.82	-1.32	-1.64	-1.47	-1.05	-1.06	-1.58	-1.14	-1.3	1	1.14	1.17	-1.37	1.16	-1.19	-1.28	1.06	1.33	-1.06	1.04	-1.07	1.02	1.04	-1.1	-1.09	-1.1	-1.19	-1.25	1.82
271	A_51_P230287	NM_030889	NM_030889	81840	Sorcs2	-1	1.4	1.59	1.29	1.52	1.39	-1.02	-1.04	1.17	-1.08	-1.08	-1.09	1	-1.02	1.28	1.09	1.82	1.36	1.06	1.05	1.16	1.04	1.07	1.13	-1.06	1.21	1.59	1.06	1.06	1.21	1.82
272	A_51_P234407	NM_013769	NM_013769	27375	Tjp3	1.07	1.29	1.39	1.18	1.54	1.54	-1.3	-1.04	1.37	1.02	1.09	1.23	-1.16	-1.3	-1.2	1.01	1.04	-1	1.1	1.39	1.09	1.23	-1.01	1.2	1.1	1.37	1.82	1.04	-1.07	1.66	1.82
273	A_51_P181671	NM_008398	NM_008398	16404	Itga7	1.21	1.47	1.81	1.26	1.69	1.65	-1	1.07	1.38	1.17	1.1	1.23	-1.02	-1.14	1.17	1.11	1.33	1.3	1.01	1.11	1.09	1.13	-1	1.04	1.04	-1.1	1.09	1.03	1.06	1.2	1.81
274	A_51_P340699	AK004371	AK004371	68895	Rasl11a	-1.16	1.09	1.24	-1.16	1.1	1.26	-1.31	1.23	1.38	1.15	1.2	1.41	-1.4	1.23	-1.33	-1.06	-1.81	-1.14	-1.25	1.13	-1.37	1.36	-1.72	1	-1.09	1.09	-1.01	-1.05	1.12	1.05	1.81
275	A_51_P157112	NM_008458	NM_008458	16625	Serpina3c	-1.03	1.33	1.58	1	1.51	1.81	-1.13	1.18	1.1	-1.08	1.24	1.09	1.09	1.18	1.05	1.17	-1.06	-1.12	-1.04	1.01	1.03	-1.03	1.08	1.14	1.33	-1.16	-1.07	1.05	1.06	-1.13	1.81
276	A_51_P476091	ENSMUST00000031271	AB017020	NA		-1.06	1.28	1.1	1.04	1.28	1.12	-1.27	-1.15	1.07	-1.26	-1.09	-1.2	1.76	1.22	1.46	1.51	1.81	1.68	1.58	1.11	1.15	1.22	1.22	1.41	1.08	1.22	1.37	1.07	1.14	1.13	1.81
277	A_51_P455997	XM_981786	XM_981786	17263	Gtl2	1.81	1.69	1.01	-1.03	1.12	1.11	-1.13	-1.04	-1.19	1.18	-1.14	-1.11	1.35	1.07	1.48	1.21	1.67	-1.02	1.4	-1	1.03	1.04	1	1.18	1.12	-1.22	-1.04	1.05	-1.06	1.38	1.81
278	A_51_P337089	AK013116	AK013116	69270	Gins1	-1	1.51	1.63	1.15	1.64	1.69	1.01	-1.13	1.38	1.12	1.01	1	1.17	-1	1.23	1.29	1.81	1.56	1.13	1.15	1.15	1.17	1.09	1.11	-1.03	1.09	1.52	1.01	1.12	1.11	1.81
279	A_51_P360492	NM_008567	NM_008567	17219	Mcm6	-1.11	1.28	1.38	1.09	1.4	1.46	-1.04	-1.23	1.06	-1	-1.08	-1.14	1	-1.03	1.25	1.19	1.81	1.33	1.02	-1.11	1.1	-1.25	1.07	1.01	1.13	1.4	1.71	1.01	1.01	1.02	1.81
280	A_52_P209527	BC019741	BC019741	50782	Rgs11	1.44	1.64	-1.29	-1.03	-1.08	-1.29	-1.33	-1.14	-1.1	-1.09	-1.13	-1.12	1.26	1.08	1.34	1.11	1.28	1.03	1.8	1.23	1.18	1.12	1.23	1.51	1.11	1.06	1.02	-1.08	1.03	1.3	1.8
281	A_51_P245789	NM_029620	NM_029620	76477	Pcolce2	-1.06	-1.35	-1.64	-1.03	-1.32	-1.34	-1.01	1.13	-1.26	-1.19	-1.1	-1.24	1.1	1.2	-1.2	-1.02	-1.79	-1.8	-1.06	1.18	-1.02	1.14	-1.03	1.02	-1.11	-1.05	-1.63	-1.03	1.01	-1.36	1.8
282	A_51_P174961	NM_007972	NM_007972	14058	F10	1.3	1.48	1.68	1.14	1.72	1.61	1.04	1.01	1.28	1.61	1.27	1.17	1.29	-1.1	1.61	1.32	1.78	1.34	1.28	1.15	1.25	1.03	1.44	1.3	-1.02	1.4	1.8	1.03	-1.12	1.01	1.8
283	A_51_P337662	NM_172779	NM_172779	236790	6330505F04Rik	1.1	1.17	-1.32	-1.02	-1.2	-1.34	-1.43	-1.31	-1.05	-1.23	-1.14	-1.15	1.33	1.06	1.27	1.19	1.25	-1.08	1.8	1.15	1.25	1.13	1.26	1.5	1.05	1.18	1.05	-1.05	-1.02	1.25	1.8
284	A_51_P272553	NM_011498	NM_011498	20893	Bhlhb2	-1.08	-1.06	1.17	1.05	1.1	1.12	1.59	-1.04	-1.03	1.16	-1.11	1.08	1.71	-1.09	1.52	1.39	1.8	1.76	1.13	-1.26	1.33	-1.01	1.56	1.01	-1.25	-1.08	1.27	1.02	-1.07	1.27	1.8
285	A_51_P446179	NM_145403	NM_145403	214523	Tmprss4	1.04	1.16	1.3	1.14	1.28	1.27	-1.1	1	1.17	-1.08	1.04	-1.03	-1.04	-1.06	1.24	1.12	1.53	-1.03	1.3	1.34	1.71	1.02	1.45	1.58	1.04	1.68	1.8	-1.04	1.04	1.29	1.8
286	A_51_P316042	NM_175362	NM_175362	108723	Card11	-1.04	-1.09	-1.65	-1.17	-1.8	-1.67	-1.42	-1.21	1.23	-1.07	1.01	-1.04	-1.17	1.06	-1.59	-1.01	-1.38	-1.36	1.42	1.37	1.31	1.15	1.35	1.75	1.25	1.19	-1.08	1.34	1.19	-1.04	1.8
287	A_51_P114910	NM_007793	NM_007793	13014	Cstb	1.07	1.31	1.59	1.26	1.58	1.53	-1.04	-1.02	1.33	1.03	1.02	1.14	-1.1	-1.09	1.37	1.16	1.79	1.35	-1.04	1.02	1.29	-1.17	1.31	1.19	1.12	1.27	1.63	1.12	1.08	1.37	1.79
288	A_52_P223508	AK081581	AK081581	103012	6720401G13Rik	1.5	1.79	-1.11	1.13	1.05	-1.06	-1.14	1.02	1.08	1.03	-1	1.1	1.11	1.04	1.26	1.06	1.19	1.04	1.45	1.03	1.01	1.03	1.02	1.13	1.08	1.06	1.02	-1	1.04	1.44	1.79
289	A_51_P291501	AK053890	AK053890	218630	Ung2	1.01	1.14	1.51	1.09	1.48	1.39	1.18	1.16	1.14	1.24	-1.07	-1.01	1.07	-1.25	1.26	-1.09	1.5	1.38	1.16	1.05	1.08	1.07	1.01	-1.06	-1.46	1.22	1.79	-1.08	-1.22	1.45	1.79
290	A_51_P415395	BC039571	BC039571	75697	3300001A09Rik	-1.07	-1.04	1.02	1.09	1.1	1.05	-1.1	-1.05	1.16	1.02	1.11	1.11	1.11	1.06	1.04	1.04	-1.04	-1.02	1.34	1.53	1.32	1.48	1.42	1.43	1.24	1.54	1.79	1.04	1.04	1.3	1.79
291	A_51_P130095	NM_010187	NM_010187	14130	Fcgr2b	1.04	1.28	1.39	1.03	1.12	1.25	1.14	-1.04	1.42	1.63	1.25	1.43	1.05	1.02	1.29	1.28	1.79	1.34	1.14	-1.04	1.36	-1.04	1.56	1.23	1.31	1.17	1.4	1.13	-1.04	1.09	1.79
292	A_52_P223571	NM_175403	NM_175403	109154	2410014A08Rik	1.09	1.4	1.66	1.16	1.47	1.63	1.05	-1.04	1.08	1.05	1.04	1.03	1.21	1.02	1.41	1.17	1.78	1.45	-1.13	-1.01	-1.1	-1.04	-1.13	-1.14	-1.02	1.06	1.45	1.03	1.02	1.01	1.78
293	A_51_P172573	NM_013671	NM_013671	20656	Sod2	1.04	1.46	1.72	1.16	1.65	1.78	1.12	1.03	1.28	1.09	1.05	1.18	1.09	-1.15	1.34	1.26	1.44	1.34	-1	1.08	1.13	1.06	1.11	1.06	1.01	1.04	1.45	-1.04	-1.1	1.24	1.78
294	A_51_P222467	NM_009593	NM_009593	11307	Abcg1	-1.1	-1.26	-1.78	-1.16	-1.51	-1.67	-1.14	-1.04	1.17	-1.18	-1.11	-1.1	-1.11	1.09	-1.22	-1.06	-1.61	-1.13	1.1	-1.01	1.1	1.05	1.32	1.15	-1.08	1.33	-1.07	1.15	1.15	-1.12	1.78
295	A_52_P615274	NM_026001	NM_026001	67153	Dleu8	-1.01	1.01	1.07	1.01	-1.01	1.07	1.23	-1.1	-1.05	1.05	-1.11	-1.07	1.3	-1.01	1.28	1.11	1.78	1.33	1.12	1.07	1.15	1.02	1.23	1.03	1.03	1.11	1.19	1.01	1.01	1.01	1.78
296	A_51_P448236	NM_007802	NM_007802	13038	Ctsk	1.22	1.78	1.65	1.52	1.77	1.72	-1.15	-1.21	1.65	1.38	-1.01	1.37	1.31	-1.39	1.19	1.47	1.62	1.33	1	-1.02	1.46	1	1.77	1.49	-1.01	1.32	1.62	1.06	1.02	1.62	1.78
297	A_52_P253179	BC058261	BC058261	16009	Igfbp3	-1.09	-1.46	-1.78	-1.37	-1.74	-1.78	-1.29	1	-1.19	-1.08	-1.12	-1.22	1.14	1.19	-1.24	1.12	-1.47	-1.32	1.08	-1.06	-1.14	1.16	-1.15	-1.08	-1.08	-1.1	-1.45	1.03	1.17	-1.07	1.78
298	A_51_P419246	AK158034	AK158034	381232	5830416P10Rik	-1.12	1.19	1.33	1.08	1.22	1.1	-1.14	-1.17	1.04	-1.14	1.16	-1.17	1.07	1.12	1.13	1.31	1.34	1.29	1.09	1.18	-1.18	-1.13	-1.19	1.13	1.54	1.78	1.47	1.34	1.16	1.16	1.78
299	A_51_P354792	NM_008521	NM_008521	17001	Ltc4s	1.24	-1.36	-1.78	-1.21	-1.75	-1.56	-1.05	1.05	-1.03	1.16	-1.04	-1.1	1	1.04	-1.43	-1.15	-1.69	-1.64	1.07	1.07	1.02	-1.03	1.08	1.09	1.22	-1.34	-1.74	1.28	1.14	-1.26	1.78
300	A_51_P337412	NM_146015	NM_146015	216616	Efemp1	-1.11	-1.14	-1.42	-1.01	-1.22	-1.17	-1.11	1.01	-1.21	-1.09	-1.03	-1.12	-1.16	1.12	-1.34	-1.23	-1.78	-1.22	1.15	-1.17	1.15	-1.12	-1.09	-1.03	-1.14	-1.22	-1.54	1.05	1.15	-1.17	1.78
301	A_51_P111335	NM_001013785	NM_001013785	432720	Akr1c19	-1.13	1.11	1.15	1.04	1.1	-1.1	-1.18	-1.15	1.22	-1.1	-1.1	1.02	1.17	1.03	1.47	1.08	1.78	1.41	1.26	1.06	1.63	-1.02	1.51	1.5	-1.03	1.19	1.27	-1.02	1.16	1.28	1.78
302	A_51_P468140	NM_008223	NM_008223	15160	Serpind1	1.21	1.66	1.58	1.09	1.62	1.77	1.15	1.23	1.39	1.23	1.69	1.63	1.1	1.14	1.37	1.4	1.29	-1.02	1.18	1.18	1.49	-1.02	1.66	1.43	1.04	1.26	1.17	-1.04	-1.03	1.04	1.77
303	A_52_P52618	AK154286	AK154286	12983	Csf2rb1	1.05	1.43	1.35	1.14	1.24	1.33	-1.07	-1.1	1.49	1.07	1.1	1.26	1.2	-1	1.38	1.25	1.77	1.51	1.06	-1.06	1.11	-1.09	1.3	1.15	1.16	1.34	1.44	1.07	-1.09	-1.03	1.77
304	A_51_P476767	NM_010924	NM_010924	18113	Nnmt	-1.08	1.11	1.43	1.14	1.37	1.49	-1.03	-1.15	-1.1	1.04	-1.17	-1.16	1.26	1.12	1.45	1.13	1.77	1.76	-1.1	-1.08	1.03	-1.05	-1.08	-1.09	1.42	-1.6	-1.14	1.37	1.38	1.05	1.77
305	A_51_P144143	A_51_P144143		NA		1.15	1.49	1.37	1.09	1.22	1.34	-1.12	-1.13	1.45	1.11	1.12	1.23	1.33	-1.04	1.43	1.22	1.77	1.51	1.06	1	1.13	-1.04	1.28	1.19	1.25	1.36	1.48	1.11	-1.12	-1.01	1.77
306	A_51_P255657	XM_985599	XM_985599	70134	2210011C24Rik	-1.21	-1.35	-1.77	-1.12	-1.45	-1.65	-1.14	-1.11	-1.26	-1.33	-1.3	-1.56	-1.02	1.25	-1.09	-1.02	-1.36	-1.4	1.14	1.09	1.03	-1.01	-1.1	1.19	-1.04	1.05	-1.24	1.06	1.18	-1.42	1.77
307	A_51_P237856	NM_008328	NM_008328	15950	Ifi203	1.03	1.3	-1.08	1.03	-1.13	-1.06	-1.47	-1.33	1.17	-1.25	1.13	1.13	1.03	1.22	1.07	1.05	1.28	1.04	1.39	1.21	1.34	-1.04	1.32	1.54	1.77	1.4	1.24	1.06	1.1	1.13	1.77
308	A_51_P501858	NM_148927	NM_148927	69217	Plekha4	1.06	1.12	1.17	1.08	1.16	1.17	-1	-1.1	1.19	1.07	1.12	1.24	-1.09	1.06	1.31	1.12	1.77	1.17	1.12	1.18	1.29	1.16	1.27	1.3	1.14	1.08	1.39	1.02	1.08	1.29	1.77
309	A_52_P36315	NM_010164	NM_010164	14048	Eya1	1.16	1.1	1.02	-1.1	1.01	1.04	-1.12	1.11	1.12	1.08	1.15	1.06	-1.43	1.01	-1.77	-1.08	-1.61	-1.4	1.02	1.4	-1.1	1.29	-1.23	1.06	1.05	1.15	1.19	-1	1.01	1.19	1.77
310	A_52_P434306	XM_193814	XM_193814	69700	Col22a1	1.03	1.26	1.77	1.05	1.47	1.53	1.09	1.08	1.26	1.04	1.07	1.27	1.09	-1	1.33	1.11	1.57	1.35	-1.09	1.04	1.19	-1.01	1.14	-1.03	1.11	1.09	1.39	1.03	1.03	1.25	1.77
311	A_51_P245631	BC038341	BC038341	74013	3222401M22Rik	-1.06	-1	-1.12	-1.12	-1.17	-1.22	-1.09	1.2	-1.06	-1.17	1.04	-1.07	-1.17	1.14	-1.36	-1.15	-1.76	-1.41	1.02	1.08	-1.17	1.19	-1.19	1.02	-1.06	1.08	-1.16	1.03	1.12	-1.17	1.76
312	A_51_P503625	NM_010356	NM_010356	14859	Gsta3	-1.04	-1.25	-1.54	-1.07	-1.22	-1.17	1.09	1.09	-1.15	-1.16	1.06	-1	-1.2	-1.2	-1.4	-1.26	-1.76	-1.68	1.13	1.51	1.17	1.31	1.16	1.23	-1.04	-1.2	-1.57	1.04	-1	1.03	1.76
313	A_52_P88033	NM_080728	NM_080728	140781	Myh7	-1.13	-1.46	-1.76	-1.18	-1.64	-1.58	-1.16	-1.04	-1.25	1	-1.04	-1.24	-1.04	-1.02	-1.61	-1.3	-1.56	-1.55	1.16	1.12	-1.05	1.11	-1.2	1.1	-1.2	1.05	-1.31	1.15	1.19	-1.11	1.76
314	A_52_P366525	NM_026424	NM_026424	67876	1500041J02Rik	1.07	-1.1	1.01	1.02	-1.02	1.07	1.76	1.29	1.24	1.18	-1.16	1.05	1.21	1.17	1.55	1.39	1.56	1.34	-1.15	-1.54	1.04	-1.16	1.21	-1.21	-1.1	-1.01	1.02	1.02	-1.01	-1.08	1.76
315	A_51_P148105	NM_011234	NM_011234	19361	Rad51	-1.02	1.42	1.74	1.2	1.69	1.76	1.17	-1.09	1.24	1.32	1.06	1.02	1.15	-1.02	1.14	1.22	1.64	1.57	-1.02	1.09	1.02	1.11	-1.1	-1.1	-1.05	1.16	1.69	1.01	-1.03	1.13	1.76
316	A_51_P153486	NM_018808	NM_018808	81489	Dnajb1	1.11	1.05	1.05	1.08	-1.07	-1.02	1.5	1.4	1.31	1.01	-1.1	1.1	-1.15	1.19	1.52	1.01	1.29	1.08	-1.54	-1.76	-1.08	-1.43	-1.26	-1.53	-1.57	-1.4	-1.35	-1.27	-1.32	-1.12	1.76
317	A_51_P496720	NM_019448	NM_019448	54427	Dnmt3l	-1.07	1.12	1.43	1.1	1.4	1.23	1.05	-1.11	1.03	-1.15	-1.26	-1.19	1.09	-1.09	1.34	1.06	1.76	1.49	-1.01	1.16	1.07	1.2	-1.01	-1.04	-1.11	1.01	1.36	-1.02	1.05	1.07	1.76
318	A_51_P328613	NM_010188	NM_010188	14131	Fcgr3	1.1	1.09	1.34	1.1	1.06	1.31	1.11	1.02	1.46	1.29	1.16	1.43	-1.01	-1.12	1.17	1.08	1.76	1.27	-1.28	-1.1	1.02	-1.33	1.16	-1.04	1.18	1.04	1.16	1.14	-1.13	1.11	1.76
319	A_51_P497993	XM_130346	XM_130346	68526	Gpr155	1.06	-1.21	-1.44	-1.02	-1.31	-1.38	1.75	1.25	-1.16	-1.04	-1.06	-1.03	-1.12	-1.08	-1.08	-1.14	-1.1	-1.75	1.02	1.03	1.17	1.09	1.22	-1	-1.23	1.24	1.04	-1.34	-1.47	1.07	1.75
320	A_51_P130101	NM_010187	NM_010187	14130	Fcgr2b	-1.01	1.2	1.42	-1	1.11	1.26	1.12	-1.03	1.41	1.62	1.23	1.34	1.24	-1.05	1.23	1.22	1.75	1.43	1.1	-1.04	1.21	1.08	1.37	1.11	1.23	1.15	1.28	1.11	1.04	1.1	1.75
321	A_51_P339305	NM_016812	NM_016812	53325	Banp	-1.11	-1.12	1	-1.1	-1.12	-1.06	1.75	1.61	1.25	1.17	1.32	1.53	-1.07	-1.12	1.29	-1.16	1.02	-1.06	-1.19	-1.38	-1.05	-1.36	-1.05	-1.36	-1.19	-1.16	-1.4	-1.26	-1.4	-1.07	1.75
322	A_52_P408757	NM_010188	NM_010188	14131	Fcgr3	1.09	1.24	1.46	1.04	1.08	1.31	1.07	-1.05	1.37	1.39	1.1	1.3	-1	-1.07	1.03	1.04	1.75	1.27	-1.29	-1.3	-1.1	-1.43	1.07	-1.21	1.2	1.09	1.12	1.02	-1.06	-1.01	1.75
323	A_51_P511810	NM_007653	NM_007653	12512	Cd63	-1.12	1.04	1.45	1.02	1.4	1.5	-1.03	-1.05	1.17	1.03	-1.07	1.11	-1.02	-1.15	1.22	1.15	1.75	1.25	-1.09	-1.04	1.01	-1.08	1.06	-1.02	1.05	1.05	1.33	-1	1.06	1.11	1.75
324	A_51_P198434	BC080756	BC080756	14972	H2-K1	-1.16	1.03	-1.01	1.05	1.06	1.04	1.08	-1.04	1.75	1.08	1.22	1.64	1.08	1.12	-1.01	1.13	1.08	1.1	1.02	1.02	1.42	1.09	1.49	1.31	1.14	1.1	1.21	-1.01	-1.03	1.73	1.75
325	A_51_P418168	NM_029103	NM_029103	74840	Armet	1.04	1.19	1.75	-1.01	1.45	1.64	1.37	1.08	1.07	1.37	1.09	1.33	1.07	1.06	1.43	1.23	1.52	1.23	-1.27	-1.1	-1.11	-1.24	-1.05	-1.27	1.21	1.24	1.52	-1.07	-1.15	-1.07	1.75
326	A_51_P388847	NM_145934	NM_145934	106766	AW049765	1.2	1.45	1.19	1.15	1.25	1.19	-1.21	-1.15	1.07	-1.09	-1.04	-1.12	1.26	1.18	1.52	1.31	1.75	1.28	1.37	1.15	1.27	-1.05	1.16	1.36	1.1	1.36	1.36	-1.02	1.04	1.15	1.75
327	A_51_P334942	NM_013467	NM_013467	11668	Aldh1a1	1.02	-1.18	-1.6	-1.13	-1.34	-1.36	1.13	1.21	-1.24	-1.06	1.04	-1.05	-1.4	-1.32	-1.35	-1.06	-1.75	-1.67	-1.09	1.33	1.04	1.06	1.01	1.06	1.01	-1.11	-1.31	-1.06	-1.13	1.23	1.75
328	A_51_P454217	NM_019408	NM_019408	18034	Nfkb2	1.05	1.35	1.53	1.24	1.57	1.74	-1.04	-1.01	1.22	1.14	1.08	1.26	-1.15	-1.08	1.17	1.21	1.39	1.16	-1.12	1.06	1.07	-1.18	1.03	1.06	1.31	1.2	1.43	1.1	1.06	1.21	1.74
329	A_52_P393589	NM_133733	NM_133733	71566	9030425E11Rik	-1.02	1.17	1.74	1.07	1.47	1.49	-1.15	-1.03	1.2	-1.12	-1.01	1.22	-1.11	-1.02	1.17	1.06	1.17	1.36	-1.17	-1.05	-1.06	-1.07	-1.14	-1.13	1.2	1.03	1.24	-1	1.11	1.09	1.74
330	A_52_P669510	TC1447684		NA		1.03	1.41	1.74	1.18	1.71	1.6	-1.1	-1.09	1.05	-1.1	-1.11	-1.14	1.03	-1.02	1.49	1.28	1.63	1.31	1.1	-1.04	1.11	-1.01	1.2	1.18	1	1.27	1.56	-1.04	1.04	1.15	1.74
331	A_51_P235123	NM_008690	NM_008690	18037	Nfkbie	-1.08	1.36	1.5	1.2	1.53	1.56	-1.21	-1.15	1.4	1.23	1.23	1.38	1.27	1.19	1.3	1.47	1.55	1.49	1.06	1.16	1.34	1.13	1.19	1.31	1.39	1.29	1.74	1.2	1.12	1.39	1.74
332	A_52_P431981	AK122289	AK122289	18845	Plxna2	-1.16	-1.22	1.05	-1.02	1.05	-1.01	1.74	1.52	1.1	-1.1	1.23	1.14	1.1	-1	1.69	1.03	1.12	1.16	-1.2	-1.36	-1.01	-1.31	1.14	-1.21	-1.25	-1.07	-1.13	-1.11	-1.17	-1.06	1.74
333	A_52_P59784	AK051199	AK051199	NA		-1.49	-1.35	-1.39	-1.22	-1.38	-1.74	1.01	1.15	-1.22	-1.11	1.01	-1.14	-1.23	1.03	1.27	-1.03	1.11	-1.23	1.22	1.06	1.36	1.05	1.36	1.17	1.01	1.11	1.03	1.1	1	-1.13	1.74
334	A_51_P114826	NM_019707	NM_019707	12554	Cdh13	-1.16	-1.41	-1.58	-1.05	-1.39	-1.38	-1.13	-1.2	-1.41	-1.03	-1.24	-1.59	-1.46	-1.12	-1.72	-1.27	-1.74	-1.43	-1.11	-1.03	-1.29	-1.01	-1.57	-1.12	-1.15	-1.18	-1.3	-1.08	1.06	-1.34	1.74
335	A_52_P380805	NM_010329	NM_010329	14726	Pdpn	-1.03	1.35	1.73	1.04	1.44	1.52	1.05	-1.12	-1.01	-1.09	-1.11	-1.03	1.1	1.21	1.18	1.29	1.47	1.39	-1.27	-1.33	-1.12	-1.31	-1.13	-1.15	1.04	1.1	1.28	-1.01	1.03	-1.05	1.73
336	A_51_P381618	NM_134102	NM_134102	85031	Pla1a	1.03	1.02	1.54	1.17	1.38	1.63	-1.09	-1.09	1.16	1.19	1.11	1.17	-1.08	-1.03	1.29	1.03	1.73	1.14	1.01	1.09	1.37	-1.02	1.31	1.2	1.28	-1.07	1.15	1.25	1.15	1.23	1.73
337	A_51_P312327	NM_022415	NM_022415	64292	Ptges	1.03	1.3	1.73	1.09	1.49	1.71	-1.11	1.03	1.46	1.22	1.11	1.22	1.02	-1.03	1.18	1.13	1.28	1.25	1.01	1.11	1.01	1.09	-1.09	-1.04	1.27	-1.27	1.1	1.1	1.19	1.25	1.73
338	A_51_P227445	ENSMUST00000050829	AK008147	NA		-1.22	-1.12	-1.4	-1.11	-1.31	-1.45	-1.1	-1.03	-1.24	1.02	1.13	-1.05	-1.28	-1.33	-1.7	-1.21	-1.73	-1.58	1.3	1.64	1.13	1.58	-1.04	1.35	1.09	-1.07	-1.03	-1.01	-1.04	1.33	1.73
339	A_51_P502614	NM_026268	NM_026268	67603	Dusp6	1.29	1.33	1.24	1.26	1.13	1.08	1.25	1.2	1.11	1.15	-1.23	-1.01	1.31	1.71	1.51	1.5	1.73	1.52	-1.05	-1.23	-1.02	1.22	1.02	-1.07	-1.04	1.12	1.41	1.09	1.25	1.03	1.73
340	A_51_P223776	NM_145434	NM_145434	217166	Nr1d1	1.07	-1.1	-1.16	1.02	-1.17	-1.35	1.12	-1.02	-1.73	-1.24	1.04	-1.15	1.67	-1.13	1.07	1.08	1.05	1.09	1.26	-1.42	1.37	-1.38	1.44	1.01	-1.23	-1.52	-1.55	-1.04	-1.03	-1.01	1.73
341	A_51_P225224	NM_019564	NM_019564	56213	Htra1	-1.11	-1.15	-1.41	-1.1	-1.3	-1.14	-1.03	-1.12	-1.11	-1.05	-1.12	-1.13	-1.4	1.02	-1.54	-1.38	-1.73	-1.34	-1.27	-1.21	-1.32	-1.22	-1.58	-1.22	1.11	-1.21	-1.53	1.12	1.12	-1.16	1.73
342	A_51_P199352	ENSMUST00000020090	XM_483917	NA		1.44	-1.11	-1.08	-1.28	-1.13	1.06	-1.22	1.15	1.11	1.01	1.07	1.05	-1.18	1.22	-1.59	-1.09	-1.73	-1.41	1.23	1.26	-1.12	1.13	-1.18	1.29	1	1.05	-1.18	-1.02	1.14	1.01	1.73
343	A_51_P303424	NM_021334	NM_021334	16411	Itgax	1.07	1.35	1.17	1.13	1.14	1.06	-1.12	-1.12	1.32	1.17	1.07	1.11	1.25	1.04	1.43	1.19	1.55	1.34	1.29	1.23	1.35	1.26	1.49	1.44	1.11	1.59	1.73	1.13	1.04	1.12	1.73
344	A_51_P112734	NM_016972	NM_016972	50934	Slc7a8	-1.1	1.15	1.56	1.01	1.37	1.38	-1.01	-1.1	1.58	1.22	1.05	1.45	-1.07	1.04	1.14	1.15	1.73	1.44	-1.01	-1.08	1.39	1.05	1.43	1.16	1.4	1.03	1.52	1.09	1.13	1.45	1.73
345	A_51_P238354	NM_019549	NM_019549	56193	Plek	-1.06	1.16	1.19	-1	1.06	1.14	-1.11	-1.19	1.24	-1.02	1.05	1.14	1.52	1.18	1.4	1.58	1.6	1.72	1.18	1.13	1.2	1.23	1.38	1.21	1.14	1.29	1.36	1.06	-1	-1.02	1.72
346	A_51_P399896	NM_010768	NM_010768	17179	Matk	1.07	1.28	1.45	1.15	1.23	1.27	-1.08	-1.09	1.02	1.11	-1.04	1.05	1.04	-1	1.26	1.19	1.72	1.4	1.33	1.2	1.22	1.1	1.21	1.19	1.02	1.02	1.15	-1	1.07	1.07	1.72
347	A_52_P130787	ENSMUST00000040751	BC054804	NA		-1.06	-1.3	-1.65	-1.12	-1.46	-1.72	1.31	1.07	-1.26	-1.06	-1.11	-1.15	1.45	-1.09	1.18	1.09	1.16	-1.15	1.32	1.36	1.51	1.24	1.67	1.41	1.03	-1.04	-1.13	1.03	-1.11	1.03	1.72
348	A_51_P228658	NM_023627	NM_023627	71780	Isyna1	1.31	1.7	1.7	1.11	1.72	1.64	-1.1	-1.11	1.03	1.09	-1.03	-1	-1.02	-1.07	1.37	1.12	1.42	1.28	1.05	1.2	-1.09	1.22	-1.04	1.05	1.1	1.05	1.32	-1.05	-1	1.07	1.72
349	A_52_P412417	NM_009397	NM_009397	21929	Tnfaip3	1.12	1.49	1.42	1.28	1.45	1.43	1.09	-1.07	1.49	1.16	1.16	1.31	1.43	1.21	1.17	1.51	1.43	1.53	1.15	1.08	1.19	1.15	1.28	1.26	1.22	1.48	1.72	1.16	1.16	1.39	1.72
350	A_51_P258372	NM_030691	NM_030691	80719	Igsf6	-1.08	1.2	1.2	-1.03	-1.05	1.01	-1.22	-1.24	1.15	-1.12	1.03	-1.05	1.05	1.09	1.27	1.23	1.72	1.09	1.1	-1.12	1.09	-1.16	1.23	1.17	1.25	1.3	1.23	1.02	-1.11	-1.1	1.72
351	A_52_P11920	NM_153166	NM_153166	240058	Cpne5	-1.13	-1.34	-1.72	-1.34	-1.53	-1.55	-1.06	-1.02	-1.22	-1.18	-1.16	-1.38	-1.08	1.02	-1.28	-1.1	-1.63	-1.41	1.09	1.05	-1.18	-1.03	-1.09	1.04	-1.05	1.01	-1.19	-1	1.01	-1.21	1.72
352	A_52_P577386	NM_010531	NM_010531	16068	Il18bp	1.02	1.23	1.45	1.1	1.38	1.47	-1.01	1.02	1.22	-1.08	1.07	1.17	1.12	1.05	1.28	1.16	1.72	1.37	-1.04	-1.02	1.19	-1.03	1.15	1.13	-1.04	1	1.27	-1.12	-1.05	-1.02	1.72
353	A_52_P478159	AK054195	AK054195	18440	P2rxl1	1.53	1.72	-1.08	1.06	1.14	-1.11	-1.22	-1.07	-1.03	-1.07	-1.01	-1.08	1.29	1.08	1.2	1.21	1.15	-1.06	1.51	1.11	1.1	1.16	1.05	1.27	-1.06	-1.08	-1.02	-1.12	-1.1	1.44	1.72
354	A_51_P190499	NM_019909	NM_019909	56628	LOC56628	-1.1	1.06	1.03	1.07	1.09	1.04	1.07	-1.04	1.63	1.08	1.18	1.55	1.11	1.08	1.01	1.08	1.04	1.09	1.04	1.06	1.45	1.12	1.45	1.3	1.14	1.06	1.19	1.02	-1.01	1.72	1.72
355	A_52_P556804	TC1466492		NA		-1.04	-1.07	-1.25	-1.13	-1.32	-1.3	-1.17	-1.09	-1.15	-1.19	1.06	-1.07	1.27	-1.05	1.15	-1.02	1.06	-1.16	1.72	1.18	1.29	1.12	1.28	1.52	1.08	-1.02	-1.06	-1.07	-1.07	1.02	1.72
356	A_52_P589568	NM_194060	NM_194060	329934	Foxo6	1.11	-1.26	-1.39	-1.08	-1.24	-1.26	-1.07	-1.01	-1.21	1.13	-1.03	-1.01	-1.05	-1.11	-1.55	-1.42	-1.72	-1.32	1.12	1.15	1.05	1.31	-1.23	-1.01	1.04	-1.13	-1.33	1.1	1.17	-1.03	1.72
357	A_51_P116651	NM_019759	NM_019759	56429	Dpt	1.19	-1.01	-1.12	-1.23	-1.21	-1.12	1.13	1.05	1.06	1.14	-1.04	-1.09	1.16	-1.06	-1.21	-1.04	1.22	1.03	-1.29	-1.37	-1.14	1.01	-1.1	-1.11	-1.16	-1.37	-1.72	-1.03	-1.01	-1.16	1.72
358	A_52_P255782	NM_175316	NM_175316	101488	Slco2b1	-1.07	-1.37	-1.63	-1.15	-1.63	-1.36	-1.09	1.05	1.05	-1.09	1	-1.05	-1	-1.01	-1.38	-1.05	-1.51	-1.71	1.25	1.35	1.21	1.27	1.26	1.44	1.26	-1.08	-1.48	1.03	-1.1	-1.05	1.71
359	A_52_P587738	NM_008773	NM_008773	18442	P2ry2	1.13	1.04	1.32	-1.05	-1.01	1.18	1.22	1.11	1.31	1.05	-1.06	1.1	1.18	1.29	1.52	1.35	1.71	1.29	1.01	-1.14	1.28	-1.05	1.35	1.09	1.04	1.13	1.35	-1.01	1.07	1.12	1.71
360	A_52_P579213	NAP030391-1		NA		1.08	1.01	1.15	-1.03	1.08	1.17	1.03	-1.06	-1.01	1.09	-1.1	1.07	-1.28	-1.24	-1.1	-1.23	-1.28	-1.04	-1.61	-1.32	-1.71	-1.18	-1.54	-1.6	-1.12	-1.05	-1.06	-1.03	-1.08	-1.15	1.71
361	A_51_P175303	NM_019725	NM_019725	21886	Tle2	1.28	1.49	-1.21	-1.06	-1.07	-1.13	-1.26	-1.16	1.01	-1.16	-1.18	-1.14	1.42	1.13	1.45	1.21	1.4	1.1	1.71	1.13	1.21	1.18	1.26	1.45	1.01	1.08	1.03	-1.08	1.01	1.27	1.71
362	A_52_P417890	NM_010555	NM_010555	16178	Il1r2	1.37	1.42	1.68	1.32	1.46	1.6	1.07	-1.01	1.23	-1.05	1.11	1.05	1	1.02	1.31	1.13	1.71	1.22	-1.07	-1.07	-1.11	-1.13	-1.04	1.04	-1.01	1.1	1.15	1.08	1.02	1.01	1.71
363	A_51_P449171	NM_007464	NM_007464	11796	Birc3	1.01	1.29	1.32	1.12	1.28	1.33	-1.25	-1.17	1.27	1.02	1.16	1.26	1.27	1.03	1.14	1.19	1.18	1.26	1.26	1.03	1.34	1.16	1.37	1.31	1.12	1.31	1.7	1.11	1.04	1.44	1.7
364	A_51_P438820	NM_023258	NM_023258	66824	Pycard	1.5	1.15	1.34	1.14	1.35	1.32	-1.16	-1.19	1.28	1.06	1.06	1.21	-1.28	-1.1	1.08	1.13	1.45	1.1	1.3	1.45	1.61	1.1	1.62	1.69	1.38	1.28	1.7	1.17	1.12	1.36	1.7
365	A_51_P451458	NM_174857	NM_174857	71738	Mamdc2	-1.03	-1.3	-1.67	-1.09	-1.65	-1.46	-1.18	1.03	-1.14	-1.25	-1.11	-1.29	1.51	1.15	1.03	1.13	-1.24	-1.25	1.08	1.08	1.1	1.21	1.12	1.27	-1.22	-1.05	-1.7	1.02	1.23	-1.05	1.7
366	A_51_P239177	NM_175391	NM_175391	108956	2210421G13Rik	-1.13	1.03	1.05	1.09	-1.05	-1.11	1.14	1.16	1.21	1.6	1.69	1.28	-1.22	1	-1.52	-1.12	-1.7	-1.61	-1.03	-1.01	-1.06	-1.05	-1.03	1.1	1.15	1.16	1.18	1.12	1.12	1.18	1.7
367	A_52_P123018	NM_010498	NM_010498	15931	Ids	-1.11	-1.08	-1.28	-1.05	-1.19	-1.21	-1.01	1.03	-1.06	-1.03	1.04	-1.12	-1.39	1.07	-1.41	-1.16	-1.7	-1.37	-1.1	-1.09	-1.18	-1.07	-1.25	-1.16	-1.08	1.09	-1.06	-1.14	-1.06	-1.18	1.7
368	A_51_P159503	NM_001040005	NM_001040005	629974	D11Ertd759e	-1.18	1.05	1.11	-1.09	-1.02	1.05	-1.05	-1.19	1.63	1.03	1.28	1.7	1.16	1.19	1.36	1.19	1.7	1.31	1.13	-1.07	1.5	-1.02	1.51	1.39	1.21	1.13	1.34	-1.09	-1.14	1.34	1.7
369	A_51_P400699	NM_030179	NM_030179	78785	Rsnl2	1.26	1.56	1.7	1.16	1.56	1.6	-1.23	-1.26	1.14	-1.02	-1.1	1.01	1.07	-1.1	1.21	1.28	1.65	1.35	1.08	1.05	-1.01	1.16	1.05	1.12	-1.01	1.17	1.47	-1.07	-1.03	1.43	1.7
370	A_51_P202857	NM_025866	NM_025866	66953	Cdca7	1.09	1.25	1.35	1.2	1.23	1.15	-1.2	-1.1	-1.03	-1.01	-1.15	-1.15	1.18	1.03	1.34	1.16	1.7	1.55	1.04	-1.03	1.06	1.05	-1.01	1.02	-1.1	-1	1.33	1.01	1.11	1.15	1.7
371	A_51_P278334	NM_013703	NM_013703	22359	Vldlr	-1.02	-1.2	-1.3	-1.1	-1.29	-1.32	1.03	1.02	-1.17	-1.05	-1.02	-1.08	-1.1	1.01	-1.33	-1.17	-1.7	-1.32	1.06	1.01	1.04	1.1	-1.05	-1.05	-1.21	-1.19	-1.48	-1.11	-1.01	-1.19	1.7
372	A_51_P398491	NM_021406	NM_021406	58217	Trem1	1.01	1.38	1.55	1.12	1.41	1.46	1.08	-1.04	1.24	-1.02	1.05	1.04	1.06	1.16	1.41	1.25	1.7	1.3	-1.04	-1.19	-1.1	-1.11	-1.01	-1.01	1.06	1.19	1.38	1.02	-1.08	-1.01	1.7
373	A_51_P374203	NM_023158	NM_023158	66102	Cxcl16	1.08	1.47	1.7	1.15	1.42	1.5	-1.03	-1.05	1.13	-1.04	1.01	1.07	-1.2	-1	1.22	1.01	1.43	1.24	-1.36	-1.08	-1.07	-1.1	-1.06	-1.01	-1.16	-1.01	1.25	-1.19	-1.15	-1.05	1.7
374	A_51_P446232	NM_019813	NM_019813	56320	Dbn1	1.1	1.08	1.69	1.11	1.27	1.24	1.02	-1.09	-1.08	1.05	-1.09	-1.03	1.06	-1.04	1.05	-1.08	1.12	1.16	-1.16	1.06	-1.12	1.06	-1.16	-1.15	-1.07	-1.15	-1	-1.03	1.05	-1.06	1.69
375	A_51_P405280	NM_033563	NM_033563	93691	Klf7	-1.15	-1.34	-1.09	-1.12	-1.21	-1.04	1.24	1.27	-1.12	-1.14	-1.16	-1.04	1.38	1.16	1.56	1.22	1.04	1.17	-1.28	-1.26	-1.16	-1.12	-1	-1.25	-1.08	-1.06	-1.31	-1.26	-1.28	-1.69	1.69
376	A_52_P541802	NM_026820	NM_026820	68713	Ifitm1	1.06	1.3	1.69	1.2	1.52	1.44	1.12	1.05	1.07	1.07	1.21	1.26	1.22	1.06	1.52	1.14	1.44	1.32	1.02	1.31	1.02	1.21	1.07	1.1	1.19	1.1	1.44	1.06	-1.08	1.29	1.69
377	A_51_P380432	NM_198885	NM_198885	20289	Scx	-1.06	-1.22	-1.25	-1.09	-1.08	-1.24	-1.23	1.05	-1.07	-1	-1	-1.15	-1.38	1.11	-1.36	-1.18	-1.69	-1.42	-1.19	-1.16	-1.44	-1.28	-1.56	-1.12	1.02	1.28	1.02	-1.04	1.03	-1.29	1.69
378	A_51_P489522	AK150917	AK150917	13025	Ctla2b	-1.04	1.09	1.11	1.08	1.02	1.07	1.07	-1.03	-1.14	-1.07	1.04	-1.14	1.5	1.21	1.69	1.23	1.33	1.4	-1.07	1.03	-1.07	1.01	1.04	-1.02	-1.06	1.01	1.02	1.01	-1.02	-1.41	1.69
379	A_51_P142529	NM_011316	NM_011316	20211	Saa4	-1.02	1.17	1.69	1.08	1.33	1.33	-1.11	-1.07	1.15	-1.01	1.1	1.11	1.09	-1.06	1.28	1.16	1.56	1.29	1.04	1.01	1.09	1.03	-1.01	1.03	1.1	-1	1.26	1.08	1.02	1.1	1.69
380	A_51_P395098	NM_022310	NM_022310	14828	Hspa5	1.1	1.35	1.62	1.11	1.45	1.67	1.18	1.1	1.07	1.24	1.21	1.3	-1.31	1.27	1.48	1.35	1.69	1.09	-1.5	-1.15	-1.15	-1.48	-1.13	-1.26	1.35	1.45	1.69	1.01	1.03	1.1	1.69
381	A_51_P249313	NM_028705	NM_028705	73998	Herc3	1	1.06	-1.2	1.01	-1.03	-1.12	-1.39	-1.23	1.03	-1.12	-1.01	-1.2	-1.1	1.02	-1.36	1.03	-1.24	-1.1	1.69	1.39	1.53	1.4	1.37	1.64	1.03	1.14	1.11	1.13	1.23	1.22	1.69
382	A_52_P603195	M20632	M20632	NA		1.07	1.4	1.69	1.14	1.52	1.65	-1.13	-1.13	1.21	-1.04	-1.02	1.23	1.02	1	1.28	1.15	1.34	1.08	1	1.01	1.2	-1.1	1.19	1.15	1.03	1.19	1.51	-1	-1.07	1.17	1.69
383	A_51_P104608	NM_030098	NM_030098	78416	Rnase6	-1.18	-1.1	-1.32	-1.2	-1.68	-1.43	-1.31	-1.12	-1.02	-1.07	1.04	-1.21	-1.04	1.19	-1.47	-1.04	-1.09	-1.3	1.41	1.34	1.37	1.07	1.29	1.53	1.57	1.46	-1.05	1.13	1.05	-1.2	1.68
384	A_52_P660945	NM_019861	NM_019861	56464	Ctsf	1.09	-1.05	-1.51	1.06	-1.31	-1.32	-1.07	-1.04	-1.28	-1.13	-1.11	-1.24	-1.23	-1.09	-1.46	-1.35	-1.68	-1.59	1.03	1.19	-1.04	-1.04	-1.04	1.05	1.12	-1.05	-1.61	1.03	1.02	-1.17	1.68
385	A_51_P133612	NM_026014	NM_026014	67177	Cdt1	1.01	1.33	1.34	1.11	1.34	1.36	-1.06	-1.24	1.08	1.06	1.03	-1.13	-1.12	-1.12	1.01	1.11	1.46	1.12	1.24	1.2	1.16	1.06	1.06	1.22	1.22	1.38	1.68	1.17	1.13	1.11	1.68
386	A_52_P562641	NM_030244	NM_030244	72500	Ier5l	-1.36	-1.24	1.18	-1.02	-1	-1.05	1.32	1.26	-1	-1.06	-1.16	-1.05	1.29	1.22	1.68	1.14	1.48	1.34	-1.09	-1.2	1.03	1.04	-1.02	-1.21	-1.07	-1.08	-1.01	-1.05	-1.04	-1.12	1.68
387	A_51_P379385	NM_153145	NM_153145	217258	Abca8a	1.05	-1.28	-1.67	-1.1	-1.53	-1.54	-1.11	-1.01	-1.34	-1.15	1.01	-1.19	1.27	1.17	-1.28	-1.07	-1.13	-1.4	1.1	1.41	1.01	1.43	1.12	1.27	-1.07	-1.15	-1.68	-1.01	-1.13	-1.21	1.68
388	A_51_P218984	NM_030253	NM_030253	80285	Parp9	-1.12	1.08	1.15	1.1	1.02	1.1	-1.13	-1.08	1.37	-1.1	1.16	1.35	1.51	1.27	1.19	1.3	1.68	1.38	1.12	1.09	1.52	1.14	1.43	1.39	1.06	1.07	1.3	-1.05	-1.03	1.27	1.68
389	A_51_P421140	NM_026473	NM_026473	67951	Tubb6	-1.02	1.1	1.61	1.18	1.54	1.68	1.28	1.12	1.35	1.4	1.22	1.17	-1.13	-1.12	1.21	1.19	1.52	1.26	-1.15	-1.23	-1.06	-1.11	-1.08	-1.13	1.09	1.02	1.61	1.01	1.09	1.11	1.68
390	A_51_P388826	NM_026081	NM_026081	67298	Gprasp1	-1.09	-1.13	-1.35	-1.17	-1.34	-1.38	-1.02	1.04	-1.03	1.01	1.03	1.05	-1.12	-1.03	-1.36	-1.11	-1.68	-1.48	1.15	1.09	-1.04	1.13	-1.12	1.09	1.13	1.16	-1.04	-1.04	1.03	1.07	1.68
391	A_52_P112110	NM_145987	NM_145987	213989	BC025833	-1.06	1.11	1.11	1.04	1.13	1.06	-1	-1.04	1.01	-1.11	-1.05	-1.15	1.43	1.23	1.68	1.42	1.51	1.29	1.19	-1.13	1.15	-1.02	1.2	1.18	-1.01	1.05	1.17	1.04	1.1	1.13	1.68
392	A_52_P638459	BC033508	BC033508	20304	Ccl5	-1.24	-1.2	-1.67	-1.17	-1.35	-1.3	1.16	-1.15	1.04	-1.21	1.02	-1.21	1.04	-1.09	-1.39	1.01	-1.18	-1.03	1.04	1.02	-1.13	1.06	-1.02	1.15	1.1	1.42	1.04	-1.13	1.04	-1.13	1.67
393	A_51_P297968	NM_027959	NM_027959	71853	Pdia6	-1.07	1.38	1.55	1.1	1.45	1.6	-1.02	-1.01	1.03	-1.01	1.08	-1.04	1.04	1.14	1.5	1.3	1.67	1.41	-1.19	-1.1	-1.22	-1.07	-1.17	-1.12	-1.06	1.18	1.66	-1.05	1	-1.01	1.67
394	A_51_P303346	NM_008298	NM_008298	15502	Dnaja1	1.07	1.07	1.22	1.11	1.05	1.22	1.58	1.28	1.12	1.1	1.06	1.21	-1.01	1.08	1.49	1.07	1.35	1.2	-1.61	-1.61	-1.32	-1.63	-1.24	-1.67	-1.08	-1.09	-1.1	-1.26	-1.28	-1.14	1.67
395	A_51_P253904	NM_008704	NM_008704	18102	Nme1	1.02	1.19	1.51	1.1	1.43	1.58	1.06	1	1.13	1.04	-1.02	1.06	1.09	1.03	1.45	1.13	1.67	1.4	-1.16	-1.06	-1.12	-1.24	-1.09	-1.12	1.1	1.17	1.41	-1.01	1.06	1.03	1.67
396	A_52_P456640	NM_010208	NM_010208	14191	Fgr	-1.13	1.14	1.26	1.02	-1.01	-1.01	-1.24	-1.14	1.08	-1.12	1.01	-1.11	1.28	1.1	1.34	1.34	1.67	1.5	1.09	1.17	1.02	1.07	1.02	1.21	1.24	1.62	1.66	1.31	1.1	1.04	1.67
397	A_52_P318040	BC023946	BC023946	107476	Acaca	-1	1.07	-1.05	1.04	1.07	1.06	-1.13	-1.02	1.03	1.13	1.06	-1.03	-1.32	-1.12	-1.56	-1.36	-1.54	-1.27	-1.26	-1.13	-1.34	-1.16	-1.43	-1.2	1.22	-1.67	-1.55	1.28	1.23	1.03	1.67
398	A_51_P505689	NM_010630	NM_010630	16581	Kifc2	1.23	1.38	-1.3	1.01	-1.07	-1.2	-1.22	-1.02	1.03	-1.02	1.01	-1.07	1.2	1.19	1.02	1.11	-1.02	-1.11	1.67	1.34	1.19	1.32	1.18	1.5	1.11	1.17	1.05	1.14	1.08	1.25	1.67
399	A_51_P398603	NM_030025	NM_030025	78016	4930511H11Rik	1.24	1.63	-1.14	-1.03	1.11	1.08	-1.25	-1.19	-1.03	-1.23	-1.06	-1.15	1.27	1.02	1.23	1.27	1.23	-1.06	1.67	1.25	1.15	1.18	1.19	1.46	1.02	1.05	1.04	1.05	1.05	1.31	1.67
400	A_52_P122830	NM_021395	NM_021395	12282	Hyou1	1	1.3	1.57	-1.04	1.36	1.38	1.24	1.04	1.07	1.28	1.14	1.1	-1.08	1.17	1.18	1.31	1.36	1.24	-1.05	1.11	-1.01	1.07	1.04	-1.06	1.18	1.36	1.67	1.11	1	1.01	1.67
401	A_51_P468876	NM_178118	NM_178118	330938	Dixdc1	-1.13	-1.31	-1.63	-1.08	-1.42	-1.66	-1.3	-1.04	-1.14	-1.25	-1.17	-1.22	1.02	-1.01	-1.31	1.05	-1.36	-1.22	1.39	1.29	1.27	1.47	1.17	1.33	-1.08	1.03	-1.12	1.08	1.1	1.2	1.66
402	A_52_P608020	NM_010655	NM_010655	16647	Kpna2	-1.07	-1.02	1.05	-1.08	-1.07	1.1	1.18	1.1	1.05	1.07	-1.09	1.02	-1.01	-1.05	1.1	1.04	1.23	1.19	-1.46	-1.66	-1.15	-1.45	-1.07	-1.5	-1.13	-1.15	-1.02	-1.16	-1.14	-1.14	1.66
403	A_51_P334532	AK013487	AK013487	72913	2900006A17Rik	-1.35	-1.43	-1.29	-1.29	-1.36	-1.37	-1.49	-1.2	-1.17	-1.18	-1.26	-1.33	-1.14	-1.06	-1.38	-1.29	-1.66	-1.33	-1.09	1.09	-1.19	1.21	-1.28	-1.09	1.07	1.3	1.17	-1.11	1.1	1.01	1.66
404	A_52_P70856	XM_204152	XM_204152	666060	Frmpd1	1.18	-1	-1.35	1.05	-1.05	-1.14	-1.07	1.03	-1.11	-1.09	1.1	-1.16	-1.18	1.07	-1.38	-1.23	-1.66	-1.55	1.04	1.03	-1.13	-1.06	-1.1	1.22	-1.07	1.08	-1.11	-1.12	-1.12	-1.23	1.66
405	A_52_P70810	NM_027959	NM_027959	71853	Pdia6	-1.05	1.29	1.45	1.04	1.39	1.45	-1.03	1.01	-1.01	1.09	1.07	1.03	-1.13	1.09	1.18	1.2	1.44	1.2	-1.14	-1	-1.15	-1.06	-1.15	-1.06	1.08	1.26	1.66	1.04	1.03	1.07	1.66
406	A_52_P24690	NM_177248	NM_177248	320743	A630005I04Rik	-1.14	-1.09	1.09	-1.12	1.08	1.16	-1.14	-1.03	1.09	-1.01	1.18	1.16	-1.54	-1.1	-1.58	-1.3	-1.66	-1.4	-1.27	1.09	-1.49	1.02	-1.5	-1.11	1.14	1.17	1.07	-1.17	-1.13	-1.21	1.66
407	A_51_P394394	NM_027533	NM_027533	70747	Tspan2	-1.05	-1.22	-1.52	1	-1.39	-1.57	-1.16	1.03	-1.35	-1.06	-1.03	-1.32	-1.33	-1.01	-1.33	-1.17	-1.66	-1.63	1	1.07	-1.04	1.05	-1.1	1.06	-1.01	1.1	-1.22	-1.04	-1.03	-1.51	1.66
408	A_51_P158210	NM_008564	NM_008564	17216	Mcm2	-1.06	1.45	1.57	1.24	1.63	1.57	-1.02	-1.21	1.11	-1.08	-1.05	-1.2	1.1	-1.02	1.28	1.13	1.66	1.59	-1.08	-1.01	-1.06	-1.03	-1.13	-1.16	-1.01	1.19	1.62	1.04	1.06	1.04	1.66
409	A_51_P324934	NM_008563	NM_008563	17215	Mcm3	-1.14	1.27	1.39	1.12	1.41	1.35	1.02	-1.1	1.13	1.04	-1	-1.07	1.08	-1.1	1.17	1.13	1.48	1.38	-1.03	1.03	-1.05	1.03	-1.04	-1.07	1.02	1.28	1.66	1.05	1.03	1.05	1.66
410	A_51_P401193	NM_178389	NM_178389	74246	Gale	1.18	1.22	1.43	1.01	1.63	1.66	1	1.05	1.14	1.12	-1	1.04	-1.07	-1.08	1.33	1.19	1.51	1.15	1.14	1.07	1.1	-1.1	1.07	1.1	1.24	-1.02	1.42	-1.01	-1	1.19	1.66
411	A_52_P7400	NM_007793	NM_007793	13014	Cstb	1.06	1.21	1.51	1.16	1.49	1.42	-1.02	-1.03	1.28	1.02	-1.03	1.06	1.02	-1.07	1.27	1.15	1.65	1.35	-1.03	1.02	1.15	1.02	1.19	1.04	1.01	1.22	1.51	1.05	1.03	1.24	1.65
412	A_51_P517843	NM_027450	NM_027450	384009	Glipr2	-1.08	1.24	1.52	1.06	1.49	1.62	-1.19	-1.04	1.48	1.04	1.12	1.19	-1.08	1.08	1	1.19	1.09	1.23	-1.07	1.13	-1.1	-1.04	-1.11	1.14	1.33	1.5	1.65	1.04	1.09	1.1	1.65
413	A_52_P681310	NM_011113	NM_011113	18793	Plaur	1	1.11	1.17	1.07	1.14	1.12	1.44	1.24	1.6	1.13	-1.08	1.14	1.51	1.18	1.65	1.38	1.61	1.58	-1.19	-1.37	-1.01	-1.14	1.15	-1.22	-1.12	1.01	1.12	-1.02	-1.11	-1.13	1.65
414	A_51_P114314	AK017419	AK017419	71434	5530400B01Rik	1.04	-1.07	-1.11	1.06	-1.23	-1.22	1.65	1.56	1.39	1	-1.16	-1.08	1.09	1.4	1.57	1.21	1.09	1.19	-1.63	-1.53	-1.32	-1.26	-1.27	-1.42	-1.36	-1.17	-1.23	-1.08	-1.26	-1.28	1.65
415	A_51_P413539	NM_021606	NM_021606	59126	Nek6	-1.11	1.18	1.36	1.08	1.2	1.32	-1.15	-1.11	1.26	-1.01	-1.02	1.14	-1	-1.09	1.16	1.1	1.65	1.22	-1.03	-1.1	1.11	-1.24	1.18	1.05	-1.06	1.17	1.37	-1	1.09	1.21	1.65
416	A_51_P225793	NM_175181	NM_175181	72446	2600010E01Rik	-1.1	1.01	-1.13	1.01	-1.11	-1.11	-1.08	-1.14	1.05	-1.06	1.09	-1.06	1.14	1.13	-1.65	-1.03	-1.18	-1.1	1.11	1.36	-1.05	1.22	-1.12	1.17	1.04	1.17	1.02	1.1	1.12	-1.23	1.65
417	A_51_P212308	NM_009988	NM_009988	13052	Cxadr	-1.21	1.24	1.33	1.06	1.37	1.12	1.15	-1.08	1.02	-1.01	-1.04	1.01	1.09	1.05	1.32	1.24	1.55	1.22	1.41	1.16	1.34	1.28	1.25	1.33	-1.03	1.12	1.65	1.09	1.08	1.36	1.65
418	A_51_P113195	NM_178924	NM_178924	22268	Upk1b	1.07	-1.1	-1.22	1.01	-1.14	-1.06	-1.1	1.22	-1.23	1.01	1.11	-1	1.12	1.19	-1.23	-1.26	-1.37	-1.31	-1.01	-1.18	1.04	-1.12	-1.1	-1.03	-1.02	-1.2	-1.65	1.13	1.23	-1.13	1.65
419	A_51_P183571	NM_008871	NM_008871	18787	Serpine1	1.08	-1.01	1.27	1.35	1.32	1.22	1.39	-1.02	1.25	1.03	-1.19	-1.06	1.59	1.11	1.59	1.24	1.48	1.53	-1.01	-1.01	-1.02	1.2	1.23	1.02	1.07	1.26	1.65	1.32	1.06	1.07	1.65
420	A_51_P316816	NM_023738	NM_023738	74153	Ube1l	1.1	1.45	1.16	1.03	1.13	1.11	-1.1	-1.11	1.24	-1.09	1.08	1.17	1.21	1.11	1.4	1.18	1.65	1.23	1.35	1.13	1.37	-1.09	1.31	1.43	1.3	1.33	1.37	-1.01	-1.05	1.26	1.65
421	A_51_P473259	NM_170778	NM_170778	99586	Dpyd	1.07	-1.16	-1.65	-1.07	-1.56	-1.3	-1.03	-1.01	-1.26	-1.29	-1.15	-1.31	1.04	1.27	-1.44	-1.04	-1.5	-1.48	1.05	-1.06	1.1	1.04	1.11	1.09	1.18	-1.19	-1.6	-1.13	-1.07	-1.15	1.65
422	A_51_P176954	NM_008575	NM_008575	17248	Mdm4	-1.11	1.2	1.5	1.06	1.34	1.21	1.14	1.06	1.07	-1.01	-1.01	-1.03	-1.03	1.02	1.3	-1.08	1.65	1.22	1.08	1.01	-1.02	-1.01	1.02	1.08	-1.04	1.08	1.55	1.09	1.06	1.08	1.65
423	A_51_P239203	NM_011950	NM_011950	26415	Mapk13	1.25	1.28	1.41	1.18	1.46	1.29	-1.01	1.04	1.15	1.03	-1.04	1.02	-1.14	-1.12	1.14	1.09	1.2	1.02	1.08	1.12	1.13	1.07	1.05	1.13	-1.04	1.26	1.65	1.07	1.05	1.45	1.65
424	A_52_P624149	NM_011631	NM_011631	22027	Hsp90b1	-1.16	1.18	1.21	1.03	1.22	1.18	-1	1.01	1.04	1.12	1.07	1.07	-1.01	1.16	1.15	1.35	1.24	1.18	-1.01	-1.08	-1.08	1.06	-1.11	-1.08	1.02	1.19	1.65	1.08	-1.01	1.14	1.65
425	A_51_P331752	NM_011330	NM_011330	20292	Ccl11	1.22	1.13	1.23	-1.09	1.33	1.48	1.15	1.1	1.11	1.65	1.04	1.08	1.02	-1.29	1.09	1.23	1.21	1.14	-1.06	-1.18	-1.03	-1.06	1.14	1.02	1.26	-1.17	1.08	-1.1	-1.17	1.02	1.65
426	A_51_P155843	XM_887155	XM_887155	242050	Igsf10	-1.22	-1.37	-1.47	-1.11	-1.43	-1.32	-1.16	-1.13	-1.14	-1.24	-1.22	-1.39	-1.05	1.18	-1.65	-1.1	-1.28	-1.2	1.02	-1.08	-1.09	1.02	-1.23	-1.03	-1.12	1.03	-1.11	-1.01	1.06	-1.09	1.65
427	A_52_P391624	BC049168	BC049168	69539	2300002D11Rik	1.05	-1.16	-1.35	-1.09	-1.15	-1.28	1.03	1.03	-1.1	-1.02	-1.08	-1.06	-1.29	-1.09	-1.44	-1.33	-1.65	-1.63	1.04	-1.08	1.05	-1.04	-1.08	-1.04	-1.07	-1.24	-1.4	1	-1.03	-1.06	1.65
428	A_51_P490023	NM_009450	NM_009450	22151	Tubb2a	1.07	1.24	1.5	1.07	1.28	1.4	1.28	1.11	1.05	1.1	1.02	1.03	1.21	1.19	1.59	1.24	1.62	1.65	-1.39	-1.19	-1.35	-1.07	-1.37	-1.36	1.07	1.11	1.3	-1.09	-1.02	-1.13	1.65
429	A_52_P396239	NM_153573	NM_153573	231997	Fkbp14	-1.01	1.09	1.17	1.01	1.18	1.16	1.21	-1.03	-1	-1.02	-1.15	-1.04	1.19	1.12	1.59	1.15	1.65	1.5	-1.45	-1.4	-1.22	-1.28	-1.05	-1.37	-1.12	1.01	1.15	-1.03	-1.01	-1.15	1.65
430	A_51_P176352	NM_013864	NM_013864	29811	Ndrg2	1.64	1.01	-1.03	1	-1.09	1.09	1.16	1.15	-1.2	1.19	1.18	1.1	-1.03	-1.3	-1.4	-1.29	-1.35	-1.47	1.08	1.2	-1.03	1.15	1.05	1.03	-1.02	-1.4	-1.5	-1.09	-1.03	-1.06	1.64
431	A_51_P449133	NM_013464	NM_013464	11622	Ahr	-1.1	1.18	-1.02	1.18	1.08	1.07	-1.58	-1.26	-1.31	-1.2	1.08	-1.26	1.12	1.15	-1.32	1.02	-1.38	-1.08	1.64	1.58	1.16	1.43	1.15	1.44	1.13	1.29	1.12	-1.06	1.16	-1.13	1.64
432	A_51_P186703	NM_011812	NM_011812	23876	Fbln5	-1.14	-1.23	-1.64	-1.12	-1.55	-1.47	1.07	1.07	-1.07	-1.13	-1.12	-1.17	-1.2	1.26	-1.4	-1.12	-1.58	-1.28	-1.18	-1.06	-1.05	-1.21	-1.16	-1.1	-1.06	-1.01	-1.39	1.05	1.11	-1.15	1.64
433	A_51_P491987	NM_019955	NM_019955	56532	Ripk3	1.02	1.27	1.41	1.18	1.28	1.23	1.01	-1.15	1.08	1.06	1.09	1.05	1.04	-1.07	1.37	1.06	1.64	1.25	-1.02	-1.09	1.1	-1.13	1.11	-1.02	1.06	-1	1.3	-1.05	-1.1	-1.08	1.64
434	A_52_P585104	NM_010219	NM_010219	14228	Fkbp4	1.01	1.02	1.15	1.05	1.06	1.15	1.2	1.07	-1.12	1.05	-1.12	1.07	-1.45	-1.34	-1.26	-1.33	-1.22	-1.19	-1.62	-1.18	-1.61	-1.25	-1.6	-1.64	-1.13	-1.18	-1.16	-1.24	-1.21	-1.13	1.64
435	A_52_P600975	BC050818	BC050818	83453	Chrdl1	-1.03	-1.12	-1.54	1.13	-1.36	-1.41	-1.16	1.15	-1.1	-1.36	1.08	-1.34	1.14	1.38	-1.06	-1.02	-1.44	-1.25	1.27	1.47	1.19	1.11	1.2	1.3	1.16	-1.02	-1.64	1.21	1.22	-1.12	1.64
436	A_51_P433127	NM_025654	NM_025654	66599	Rdm1	1.02	-1.24	-1.51	-1.13	-1.45	-1.43	-1.08	1.11	-1.09	-1.01	1.01	1.01	-1.29	1.01	-1.41	-1.08	-1.64	-1.59	1.24	1.27	1.17	1.11	1.11	1.25	1.12	1.02	-1.24	1.11	1.05	1.02	1.64
437	A_52_P654161	NM_009546	NM_009546	217069	Trim25	1.12	1.07	1.23	1.1	1.06	1.15	-1.08	1.01	1.38	1.03	1.12	1.34	1.15	1.17	1.26	1.13	1.64	1.2	-1.11	-1.16	1.08	1.03	1.16	1.05	1.04	1.09	1.24	-1.05	-1.02	1.17	1.64
438	A_51_P201904	NM_025316	NM_025316	66046	Ndufb5	1.2	1.16	1.17	1.03	1.12	1.1	1.12	1.11	1.01	1.19	1.11	1.03	-1.17	-1.18	-1.17	-1.06	-1.14	1.09	-1.41	-1.11	-1.49	-1.07	-1.64	-1.34	-1.1	-1.14	1.02	1.07	-1.03	1.14	1.64
439	A_51_P514623	NM_025422	NM_025422	66205	Cd302	-1.06	1.17	1.37	1.11	1.29	1.41	-1.15	-1.12	1.26	-1.1	-1.03	1.05	1.08	1.01	1.36	1.24	1.64	1.29	1.14	1.08	1.32	1.02	1.43	1.27	1.1	1.09	1.27	-1.01	-1.01	-1	1.64
440	A_51_P305140	NM_008181	NM_008181	14857	Gsta1	1.37	-1.55	-1.53	-1.14	-1.36	-1.61	1.22	1.24	-1.22	1.01	-1.08	-1.04	1.15	-1.31	-1.27	-1.14	-1.54	-1.3	1.02	1.63	1.09	1.42	1.01	1.07	-1.3	-1.23	-1.56	-1.04	-1.14	-1.04	1.63
441	A_51_P317321	NM_178787	NM_178787	320678	A930037G23Rik	1.18	1.25	-1.15	-1.01	-1.16	-1.26	-1.25	-1.19	-1.12	-1.2	-1.02	-1.18	1.36	1.13	1.33	1.07	1.27	1.01	1.63	1.34	1.21	1.3	1.34	1.57	1.02	-1.05	-1.17	-1.12	-1.04	-1.21	1.63
442	A_52_P636482	NM_182650	NM_182650	53379	Hnrpa2b1	1.12	1.33	1.13	1.01	1.11	1.08	-1.07	-1.07	1.04	-1.05	1.02	1.02	1.45	1.07	1.57	1.28	1.63	1.38	1.37	-1	1.17	1.08	1.18	1.15	1.06	1.04	1.12	-1.03	1.03	1.17	1.63
443	A_52_P98698	NM_010650	NM_010650	16639	Klra8	-1.18	1.04	-1.63	-1.23	-1.16	-1.02	1.31	1.06	1.05	-1.25	-1.04	-1.53	1.27	-1.07	-1.11	1.1	1.24	1.02	1.07	-1.17	-1.23	-1.04	-1.06	1.07	1.1	1.42	1.13	-1.08	-1.07	-1.16	1.63
444	A_52_P624168	NM_027435	NM_027435	70472	Atad2	-1.07	1.08	1.17	1.09	1.22	1.3	1.16	-1.07	1.18	1.12	1.03	1.09	1.33	1.02	1.31	1.29	1.62	1.63	-1.06	-1.06	1.02	-1.01	-1.02	-1.13	-1.11	1.07	1.25	1.1	1.02	1.05	1.63
445	A_51_P195862	AK031681	AK031681	402755	6030487A22Rik	-1.63	-1.59	-1.25	-1.25	-1.42	-1.25	-1.01	1.01	-1.04	-1.11	-1.01	-1.08	1.02	1.11	-1.01	1.1	-1.09	-1.08	-1.02	-1.11	1.01	-1.17	1.08	1.01	1	1.22	-1.01	1	-1.01	-1.15	1.63
446	A_51_P379798	NM_134469	NM_134469	110196	Fdps	1.18	1.09	1.46	-1.03	1.42	1.63	-1.09	1.02	1.07	-1.03	-1.19	1.05	1.15	-1.15	1.05	1.08	1.37	1.24	-1.13	-1.03	-1.11	1.07	-1.23	-1.16	-1.05	-1.18	1.22	-1.21	-1.11	-1.01	1.63
447	A_52_P337427	NM_027829	NM_027829	71564	9030607L17Rik	1.34	1.51	-1.13	-1.01	1.03	-1.08	-1.31	-1.02	1.05	-1.19	-1.05	-1.02	1.43	1.11	1.11	1.11	1.09	1.02	1.63	1.25	1.28	1.24	1.26	1.57	1.01	-1.04	-1.2	-1.03	1.11	1.03	1.63
448	A_52_P217211	NM_018820	NM_018820	55942	Sertad1	1.04	-1	1.06	1.19	1.08	-1.03	1.25	1.25	1.31	1.05	-1.44	-1.03	1.17	1.29	1.63	1.05	1.59	1.29	-1.29	-1.37	-1.01	-1.12	1	-1.25	-1.28	-1.14	-1.05	1.07	1.16	-1.14	1.63
449	A_51_P172054	NM_019521	NM_019521	14456	Gas6	-1.06	-1.31	-1.51	-1.06	-1.35	-1.63	-1.13	1.02	-1.1	-1.05	-1.07	-1.11	-1.5	-1.06	-1.44	-1.18	-1.38	-1.54	1.03	-1	1.11	-1.17	-1.02	1.09	1.02	-1.08	-1.34	1.32	1.24	1.09	1.63
450	A_51_P133037	NM_008889	NM_008889	18938	Ppp1r14b	1.2	1.26	1.48	1.19	1.42	1.48	1	-1.05	-1.04	1.06	-1.1	-1.08	-1.14	-1.05	1.15	1.08	1.63	1.22	-1.15	1.05	-1.11	-1.11	-1.15	-1.07	1.12	1.13	1.39	1.14	1.14	1.1	1.63
451	A_52_P287887	BB142853	BB142853	320403	9930017N22Rik	-1.31	-1.27	-1.16	-1.09	-1.28	-1.35	-1.16	-1.01	-1.18	-1.08	1.06	-1	-1.32	-1.03	-1.33	-1.22	-1.63	-1.35	1.05	1.06	1.09	1.16	1.03	-1	-1.03	1	-1.01	-1.02	1.02	-1.09	1.63
452	A_51_P497402	NM_183091	NM_183091	72749	Nfkbil2	1.03	1.4	1.33	1.19	1.43	1.39	-1.11	-1.22	1.13	1.06	-1.03	-1.03	-1.05	-1.18	1.13	1.04	1.56	1.16	1.14	1.1	1.04	1	1.02	1.14	1.06	1.29	1.62	1.08	1.11	1.22	1.62
453	A_52_P473542	AK029938	AK029938	74485	4933430H15Rik	1.11	1.29	-1.13	-1.04	1.06	-1.18	-1.06	-1.01	-1.01	1	1.06	1.09	1.08	-1.27	1.16	1.04	1.14	-1.04	1.43	1.13	1.1	1.2	1.05	1.27	-1.21	-1.18	1.03	-1.08	-1.23	1.62	1.62
454	A_52_P292528	NM_023603	NM_023603	71514	Sfpq	-1.11	-1.04	1.22	-1.05	1.11	1.17	1.37	1.17	1.05	1.14	1.09	1.18	1.07	1.07	1.62	1.19	1.26	1.22	-1.45	-1.31	-1.06	-1.2	-1.11	-1.44	-1.08	1.01	1.08	-1.22	-1.35	-1.16	1.62
455	A_52_P469789	NM_007588	NM_007588	12311	Calcr	-1.26	-1.18	-1.41	-1.18	-1.21	-1.26	-1.18	-1.25	-1.13	-1.42	-1.27	-1.62	-1.09	1.11	-1.1	-1.14	-1.08	-1.28	1.19	1.14	1.09	-1.03	1.08	1.25	1.08	1.1	1.03	1.08	1.09	-1.12	1.62
456	A_51_P336998	NM_010376	NM_010376	14950	H13	1.05	1.31	1.62	1.21	1.5	1.57	-1.01	1.05	1.14	1.03	-1.01	1.13	-1.01	-1.25	1.01	-1.2	1.1	1.26	-1.32	-1.01	-1.28	-1.11	-1.33	-1.34	1.13	1.06	1.19	-1.02	1.07	-1.02	1.62
457	A_52_P148553	NM_021891	NM_021891	60530	Fignl1	-1.1	1.31	1.53	1.16	1.35	1.42	1.03	-1.22	1.14	1.19	-1.1	-1.04	1.05	1.01	1.15	1.32	1.62	1.61	-1.01	1.1	1.03	1.17	-1.08	-1.05	-1.05	1.11	1.55	1.05	1.08	1.13	1.62
458	A_52_P479099	AK145567	AK145567	22146	Tuba6	1.13	1.34	1.56	1.12	1.54	1.62	1.04	1.01	1.2	1.12	1.08	1.1	-1.01	-1.06	1.2	1.19	1.38	1.26	-1.05	-1.13	1.06	-1.03	1.06	-1.05	-1.04	1.15	1.55	-1.01	-1.03	1.29	1.62
459	A_51_P279100	NM_008969	NM_008969	19224	Ptgs1	1.18	1.43	1.57	1.3	1.53	1.51	-1.07	-1.05	1.41	1.08	1.1	1.11	-1.09	-1.01	1.22	1.15	1.4	1.37	1.15	-1.01	1.62	1.08	1.53	1.19	-1.04	1.02	1.34	1.01	1.12	1.39	1.62
460	A_52_P544043	BC013068	BC013068	18552	Pcsk5	-1.05	1.02	-1.03	-1.09	-1.15	-1.08	-1.12	-1.18	-1.29	-1.37	-1.25	-1.62	1.25	1.12	1.41	1.08	1.34	1.28	-1.07	-1.02	-1.03	1.13	-1.05	1.13	1.06	1.34	1.29	1.19	1.15	-1.14	1.62
461	A_51_P161946	NM_175332	NM_175332	103551	E130012A19Rik	1.05	-1.34	-1.43	-1.11	-1.49	-1.62	1.2	1.01	-1.28	-1.11	-1.1	-1.11	1.03	-1.02	-1.06	-1.09	-1.12	-1.15	1.06	-1.06	1.22	-1.07	1.27	1.05	-1.05	-1.04	-1.13	1.05	1.07	-1.14	1.62
462	A_51_P438821	NM_023258	NM_023258	66824	Pycard	1.5	1.16	1.38	1.16	1.34	1.38	-1.17	-1.21	1.25	1.01	1	1.13	1.02	-1.01	1.16	1.17	1.52	1.27	1.23	1.3	1.43	1.11	1.44	1.46	1.2	1.19	1.61	1.06	1.04	1.29	1.61
463	A_52_P586928	NM_018863	NM_018863	18610	Pdyn	-1.02	1.26	1.54	1.08	1.34	1.23	1.01	-1.18	1.08	-1.02	-1.03	1.01	1.07	1.07	1.35	1.11	1.61	1.3	-1.05	-1.02	-1.04	-1.11	1.05	-1.01	-1	1.15	1.42	1.05	-1.01	1.13	1.61
464	A_51_P148037	NM_177364	NM_177364	268396	G431001E03Rik	-1.01	1.36	1.61	1.21	1.44	1.6	1.17	1.06	1.34	1.16	1.07	1.21	1.13	-1.05	1.19	1.1	1.37	1.42	-1.22	-1.12	-1.08	-1.02	1	-1.17	-1.04	1.01	1.27	1.01	1	1.1	1.61
465	A_51_P210956	NM_011693	NM_011693	22329	Vcam1	-1.19	1.2	1.39	1.34	1.21	1.35	-1.12	-1.02	1.18	1.02	1.06	1.08	-1.14	1.21	1.16	1.23	1.61	1.33	-1.21	-1.02	-1.03	-1.25	-1.14	-1.03	1.17	1.43	1.57	1.15	1.3	1.24	1.61
466	A_51_P216965	NM_010221	NM_010221	14230	Fkbp10	-1.07	1.08	1.31	1.06	1.19	1.17	1.05	-1.09	-1.14	-1.13	-1.17	-1.26	1.03	1.05	1.39	1.11	1.61	1.36	-1.06	-1.07	1.05	-1.13	1.06	-1.05	-1.04	1.01	1.27	1.11	1.16	1.01	1.61
467	A_51_P172663	NM_016808	NM_016808	53376	Usp2	1.32	-1.15	-1.19	1.14	-1.02	-1.04	1.61	1.11	-1.01	1.18	-1.13	1.05	1.14	-1.24	1.13	-1.01	1.16	-1.04	1.01	-1.08	1.26	1.01	1.47	1.04	1.02	-1.02	1.03	-1.01	-1.02	1.13	1.61
468	A_52_P364776	NM_008563	NM_008563	17215	Mcm3	-1.06	1.24	1.41	1.03	1.44	1.51	1.06	-1.16	1.07	1.02	-1.13	-1.08	1.06	-1.17	1.15	1.07	1.61	1.26	-1.16	-1.09	-1.14	-1.18	-1.09	-1.18	1	1.03	1.2	1.07	1.14	1.02	1.61
469	A_51_P218335	NM_011532	NM_011532	21380	Tbx1	1.46	-1.07	-1.17	-1.21	-1.07	-1.08	1.19	1.11	-1.04	1.37	1.11	1.38	-1.12	-1.39	-1.39	-1.05	-1.51	-1.55	1.13	1.35	1.04	1.61	1.05	1.24	-1.07	1	1.28	-1.24	-1.61	1.29	1.61
470	A_51_P138876	NM_177345	NM_177345	227743	Mapkap1	1.24	1.21	1.09	1.04	1.11	1.09	-1.01	-1.04	1.03	1.02	1.03	-1.02	-1.28	-1.29	-1.34	-1.34	-1.21	-1.21	-1.47	-1.39	-1.61	-1.5	-1.47	-1.56	1	1.02	-1.04	-1.05	-1.01	-1.09	1.61
471	A_52_P568250	BC056383	BC056383	192196	Luc7l2	1.07	1.21	-1.09	-1.04	-1.07	-1.09	-1.03	-1.14	1.03	-1.02	-1.07	-1.05	1.34	1.14	1.42	1.33	1.61	1.22	1.42	1.01	1.24	-1.1	1.22	1.15	1.08	1.14	1.09	-1.03	-1.07	1.11	1.61
472	A_51_P155257	NM_022305	NM_022305	14595	B4galt1	1.02	1.13	1.18	1.08	1.11	1.15	1.23	1.06	1.08	-1.01	-1.06	-1.02	-1.09	1.07	1.12	1.15	1.6	1.22	-1.1	-1.02	1.05	-1.12	1.12	1.03	1.01	1.03	1.11	1.17	1.13	1.16	1.6
473	A_52_P427640	XR_002113	XR_002113	667984	LOC667984	-1.05	1.14	1.47	1.11	1.31	1.6	1.03	1.09	1.23	-1.01	1.06	-1.01	1.02	1.03	1.06	1.06	1.19	1.06	-1.05	-1.09	1.02	-1.08	-1.06	-1.12	1.01	1.04	1.22	1.03	1.06	1.07	1.6
474	A_52_P609334	NM_030075	NM_030075	78267	Klhdc8b	1.27	1.6	-1.1	1.03	-1.02	-1.02	-1.19	-1.11	-1.05	-1.27	-1.13	-1.21	1.23	1.02	1.31	1.15	1.48	1.03	1.37	1.03	1.1	-1.02	1.15	1.27	-1.01	-1	-1.01	-1.08	1.03	1.2	1.6
475	A_51_P372504	NM_172833	NM_172833	240354	Malt1	-1.01	1.39	1.3	1.14	1.23	1.26	-1.2	-1.26	1.6	1.01	1.04	1.2	1.05	-1	1.08	1.33	1.53	1.18	1.26	-1.01	1.51	-1.01	1.53	1.41	1.15	1.29	1.53	1.02	1.02	1.57	1.6
476	A_51_P369784	NM_133660	NM_133660	13897	Es22	-1.03	-1.17	-1.6	-1.01	-1.42	-1.54	1.17	1.17	-1.22	-1.19	1.05	-1.25	1.07	-1.19	-1.19	-1.29	-1.41	-1.47	1.04	1.24	1	1.29	1	1.13	-1.09	-1.14	-1.4	1.06	-1.08	1.12	1.6
477	A_51_P146208	AI841821	AI841821	NA		-1.18	-1.11	-1.06	1.07	-1.06	-1.16	1.07	-1.04	1.13	1.08	-1.1	-1.06	1.09	1.18	1.29	1.2	1.43	1.32	1.12	1.43	1.21	1.46	1.16	1.38	1.08	1.29	1.6	1.15	1.05	1.24	1.6
478	A_52_P559618	NM_030694	NM_030694	80876	Ifitm2	-1.04	1.23	1.6	1.08	1.41	1.47	1.16	1.02	1	1.04	-1.02	1.02	1.06	1.04	1.31	1.09	1.3	1.25	-1.16	1.04	-1.03	1.1	1.01	-1.05	1.02	-1	1.14	1.07	-1.02	-1.15	1.6
479	A_51_P450487	NM_009270	NM_009270	20775	Sqle	1.12	1.09	1.4	-1	1.48	1.53	-1.2	-1.04	1.08	-1.12	-1.15	1.01	1.11	-1.08	1.08	1.29	1.3	1.29	1.03	1.07	1.12	1.25	1.08	1.1	-1.06	1.08	1.6	-1.11	-1.05	1.33	1.6
480	A_51_P267494	NM_026514	NM_026514	260409	Cdc42ep3	-1.14	-1.23	-1.6	-1.13	-1.43	-1.56	-1.15	1.02	1.02	-1.13	-1.06	-1.05	-1.48	1.03	-1.26	-1.19	-1.25	-1.35	1.18	1.15	1.39	1.01	1.3	1.24	1	1.14	-1.12	1.11	1.19	1.13	1.6
481	A_51_P352296	NM_013834	NM_013834	20377	Sfrp1	-1.07	1	1.33	1.29	1.27	1.32	-1.06	-1.06	1.23	-1.11	-1.05	-1.04	-1.07	-1.09	-1.05	-1.21	1.53	1.39	-1.01	-1.1	1.29	-1.11	1.02	1.12	-1.16	1.05	1.6	1.16	1.17	1.38	1.6
482	A_51_P258465	NM_153161	NM_153161	231807	BC037034	1.24	1.44	1.07	1.04	1.23	1.11	-1.1	-1.04	1.11	1.06	-1.06	1.08	1.19	1	1.4	1.14	1.6	1.11	1.25	1.05	1.17	1.03	1.2	1.22	1.07	1.08	1.26	1.01	-1.08	1.14	1.6
483	A_51_P375201	NM_013807	NM_013807	12795	Plk3	1.38	1.2	1.27	1.14	1.23	1.15	1.21	1.17	1.5	1.26	-1.06	1.22	1.54	1.23	1.6	1.37	1.53	1.51	1.1	-1.01	1.18	1.23	1.34	1.12	-1.02	1.1	1.32	1.27	1.12	1.12	1.6
484	A_51_P331279	NM_023142	NM_023142	11867	Arpc1b	1.03	1.21	1.24	1.03	1.24	1.21	-1.07	-1.09	1.19	1.07	1.02	1.07	1.18	-1.01	1.33	1.21	1.6	1.44	-1.02	-1.09	-1.02	-1.07	1.05	-1.06	-1	-1	1.07	1.02	1.01	1.01	1.6
485	A_51_P122246	NM_029720	NM_029720	76737	Creld2	1.12	1.33	1.45	1.06	1.37	1.44	1.09	1.09	-1.02	1.27	1.13	1.29	-1.08	-1.03	1.21	1.01	1.14	1.02	-1.33	-1.03	-1.36	-1.06	-1.28	-1.35	1.3	1.25	1.6	-1.04	-1.11	1.09	1.6
486	A_51_P383689	NM_010220	NM_010220	14229	Fkbp5	1.1	-1.06	1.17	1	1.21	1.15	1.59	1.21	1.19	1.1	1.02	1.33	1.09	-1.13	1.38	-1.03	1.17	1.17	-1.25	-1.33	-1	-1.21	1.12	-1.46	-1.09	-1.13	-1.09	-1.04	-1.04	-1.04	1.59
487	A_51_P479321	NM_080575	NM_080575	68738	Acss1	-1.09	-1.07	-1.35	-1.15	-1.25	-1.42	-1.03	1.08	1	1.05	1.05	-1.04	-1.23	-1.33	-1.59	-1.17	-1.59	-1.38	1.2	1.16	-1.01	1.2	-1.08	1.12	-1.05	1.14	1.06	1.01	-1.05	1.29	1.59
488	A_52_P546363	NM_008091	NM_008091	14462	Gata3	-1.1	-1.1	-1.33	1.04	-1.14	-1.28	-1.4	-1.24	-1.24	1.01	-1.1	-1.08	1.39	1.19	-1.15	-1.02	-1.2	1.07	1.24	1.24	1.1	1.59	-1	1.22	-1.06	1.01	-1.15	1.03	1.13	-1.11	1.59
489	A_52_P672212	NM_007591	NM_007591	12317	Calr	1.08	1.34	1.5	1.15	1.51	1.59	1.08	1.06	1.04	1.15	1.07	1.13	-1.08	-1.12	1.34	-1.05	1.12	1.1	-1.19	-1	-1.2	-1.1	-1.17	-1.22	1	1.17	1.38	-1.01	-1.16	-1.15	1.59
490	A_51_P310850	BC025841	BC025841	240753	Plekha6	-1.04	-1.08	-1.59	-1.07	-1.43	-1.56	1.06	-1.15	-1.2	-1.15	-1.06	-1.19	1.36	1.21	-1.06	1.1	-1.08	-1.03	1.31	1.2	1.23	1.32	1.18	1.22	-1.14	-1.04	-1.16	-1.1	-1.03	-1.04	1.59
491	A_51_P498031	NM_008165	NM_008165	14799	Gria1	1.12	-1	1.03	1.23	1.18	1.26	-1.05	1.07	-1.16	-1.31	-1.23	-1.15	-1.18	-1.04	-1.47	-1.21	-1.59	-1.48	-1.18	-1.11	-1.1	-1.22	-1.06	-1.15	-1.13	-1.04	-1.23	-1.06	1.02	-1.08	1.59
492	A_52_P407796	NM_008618	NM_008618	17449	Mdh1	1.06	-1.07	1	-1.12	-1.02	1.12	1.17	1.05	1.03	1.22	1.09	1.12	-1.5	-1.32	-1.59	-1.33	-1.38	-1.41	-1.09	1.05	-1.07	1.1	-1.18	-1.02	1.04	-1.38	-1.15	-1.15	-1.16	1.16	1.59
493	A_51_P229602	AK028562	AK028562	18845	Plxna2	-1.11	-1.12	-1.05	-1.07	1.06	1.04	1.59	1.4	1.2	1.02	1.37	1.31	-1.49	-1.19	1.23	-1.16	1.06	-1.51	-1.08	-1.26	1.11	-1.47	1.24	-1.04	-1.05	1.09	-1.08	-1.12	-1.12	-1.09	1.59
494	A_51_P348665	NM_016894	NM_016894	51801	Ramp1	1.04	-1.36	-1.53	-1.07	-1.57	-1.53	-1.16	-1.03	-1.08	-1.1	-1.14	-1.09	-1.28	-1.02	-1.55	-1.24	-1.35	-1.59	1.11	1.3	1.18	1.01	1.14	1.27	-1.01	1.05	-1.27	-1.07	-1.03	1	1.59
495	A_52_P268104	NAP102738-1		NA		1.11	1.19	1.35	1.08	1.33	1.44	-1.03	-1.06	-1.04	-1.03	-1.05	-1.06	1.05	-1.05	1.3	1.09	1.59	1.24	-1.03	-1.07	-1.05	-1.2	-1.01	-1.04	-1	1.08	1.26	-1.03	-1.04	-1.09	1.59
496	A_51_P380129	AK018651	AK018651	13423	Dnase2a	-1.02	-1.25	-1.57	-1.09	-1.35	-1.58	-1.27	-1.11	-1.31	-1.15	-1.16	-1.29	-1.17	-1.06	-1.37	-1.25	-1.35	-1.39	1.08	1.16	-1.02	1.1	-1.23	1.09	-1.07	1.02	-1.16	1.15	1.1	1.04	1.58
497	A_51_P328300	NM_009787	NM_009787	12304	Pdia4	-1.14	1.03	1.45	-1.1	1.25	1.35	1.25	1.03	1.12	1.3	1.09	1.18	1.27	1.22	1.22	1.46	1.43	1.49	-1.04	-1.02	-1.02	1.22	-1.05	-1.07	1.17	1.08	1.58	1.24	1.05	1.2	1.58
498	A_51_P501773	NM_175434	NM_175434	210027	Slc35f3	-1.12	-1.35	-1.58	-1.11	-1.27	-1.57	-1.36	-1.22	-1.49	-1.46	-1.44	-1.45	-1.2	-1.1	-1.21	-1.1	-1.3	-1.22	1	-1.03	-1.18	1.01	-1.22	-1.06	1.03	1.14	1	1.15	1.07	-1	1.58
499	A_51_P423976	NM_013498	NM_013498	12916	Crem	-1.03	-1.04	-1.01	-1.05	-1.19	-1.05	1.58	1.42	1.26	1.17	1.29	1.18	-1.07	1.19	1.31	1.08	1	-1.05	-1.43	-1.43	-1.2	-1.38	-1.28	-1.37	-1.14	-1.03	-1.17	-1.21	-1.25	-1.12	1.58
500	A_51_P493522	NM_178929	NM_178929	107250	Kazald1	-1.06	-1.28	-1.58	-1.22	-1.5	-1.43	-1.2	-1.01	-1.06	-1.18	-1.2	-1.25	-1.07	1.02	-1.39	-1.19	-1.35	-1.32	1.18	1.22	1.03	1.1	1.02	1.13	-1.12	-1.15	-1.34	1.03	1.1	-1.2	1.58
501	A_51_P153053	NM_020561	NM_020561	57319	Smpdl3a	1.01	-1.04	-1.24	1.05	-1.34	-1.29	-1.03	1.04	-1.04	-1.08	-1.01	-1.08	-1.2	1.05	-1.22	-1.11	-1.58	-1.25	-1	1.08	1.05	1.04	1.03	1.11	-1.03	-1.02	-1.22	-1.01	-1.03	-1.12	1.58
502	A_51_P401907	AK089257	AK089257	433016	LOC433016	1.01	1.13	1.57	1.13	1.2	1.35	-1.06	1.08	1.1	-1.06	1.23	1.06	-1.04	-1.01	-1.04	1.12	1.09	-1.05	-1.27	-1.24	-1.33	-1.37	-1.27	-1.25	1.21	1.58	1.25	1.19	1.04	1.08	1.58
503	A_51_P428360	NM_023881	NM_023881	57263	Retnlb	-1.06	1.2	1.58	-1.05	1.35	1.17	1.09	-1.03	1.06	1.14	-1.04	1.01	1	-1.07	1.27	1.08	1.32	1.24	1.05	-1.1	1.01	-1.01	-1	-1.07	1.04	1.14	1.47	-1.01	-1.04	1	1.58
504	A_51_P278868	NM_010387	NM_010387	14999	H2-DMb1	-1.05	1.12	1.12	1.14	1.15	1.08	-1.03	1.02	1.2	1.14	-1.03	1.04	-1.01	1.06	1.19	1.17	1.44	1.24	1.1	1.14	1.13	1.13	1.25	1.26	1.12	1.3	1.58	1.07	1.07	1.13	1.58
505	A_52_P507802	NM_010336	NM_010336	14745	Edg2	-1	1.05	1.37	1.06	1.27	1.32	1.22	-1.03	1.1	1.03	-1.11	1.08	1.12	-1.12	1.32	1.1	1.58	1.44	-1.31	-1.3	-1.08	-1.08	-1.06	-1.36	-1.07	1.01	1.1	1.03	1.06	1.09	1.58
506	A_52_P195246	NM_177775	NM_177775	272636	D9Ertd280e	1.16	-1.02	-1.14	1.11	1.06	1.05	-1.58	-1.02	-1.21	-1.31	-1.05	-1.25	-1.02	-1	-1.3	1	-1.51	-1.28	1.18	1.41	-1.04	1.34	-1.13	1.38	1.11	1.07	1.01	1.13	1.1	1.04	1.58
507	A_51_P183400	NM_146194	NM_146194	233489	Picalm	-1.03	1.01	1.13	1.03	1.05	1.13	1.14	1.15	1.1	1.05	1.12	1.08	1.42	1.2	1.58	1.34	1.39	1.44	-1.09	-1.21	-1.01	-1.08	-1.01	-1.15	-1.08	-1.08	-1.05	-1.13	-1.13	-1.13	1.58
508	A_51_P114049	NM_134142	NM_134142	68539	Tmem109	-1.04	-1.07	-1.14	-1.13	-1.17	-1.22	-1	1.12	-1.1	-1.01	1.09	1.02	-1.29	1.05	-1.47	-1.1	-1.58	-1.41	1.01	1.05	-1.12	1.05	-1.12	-1.02	-1.03	1.08	-1.05	-1.01	1.01	-1.12	1.58
509	A_51_P474454	NM_026001	NM_026001	67153	Dleu8	1.03	1.07	1.03	1.03	-1.02	1	1.27	-1.05	-1.02	1.08	-1.09	-1.05	1.05	-1.05	1.16	1.07	1.57	1.24	1.23	1.03	1.26	-1.05	1.27	1.17	1.03	1.12	1.23	1.09	1.07	1.07	1.57
510	A_51_P492648	AK140220	AK140220	12168	Bmpr2	-1.14	-1.31	-1.1	-1.2	-1.21	-1.02	1.19	-1	-1.14	-1.03	-1.15	-1.07	1.42	1.29	1.23	1.19	-1.09	1	-1.03	1.1	-1.07	1.36	1.05	1	-1.08	1.06	-1.1	-1.23	-1.18	-1.57	1.57
511	A_52_P334670	NM_007715	NM_007715	12753	Clock	-1.05	-1.02	1.01	-1.03	-1.01	1.03	-1.12	1.09	1.02	-1.04	1.04	-1.02	-1.37	1.07	-1.15	-1.04	-1.57	-1.18	-1.13	-1.1	-1.21	-1.01	-1.32	-1.13	-1.09	1.06	-1.01	-1.12	-1.09	-1.11	1.57
512	A_51_P399853	NM_133218	NM_133218	170753	Zfp704	-1.12	-1.22	-1.43	-1.13	-1.39	-1.57	-1.06	1.03	-1.21	-1.1	-1.06	-1.24	1.02	-1.01	-1.2	-1.17	-1.32	-1.17	1.2	1.21	1.01	1.33	-1.06	1.1	-1.17	1.01	-1.2	-1.01	1.11	1.01	1.57
513	A_51_P333923	NM_133681	NM_133681	66805	Tspan1	-1.27	-1.08	1.11	-1.14	1.24	1.05	1.12	1.23	1.04	1.19	1.06	1.09	-1.1	-1.31	-1.07	-1.03	-1.2	-1.21	1.17	1.32	1.21	1.57	1.17	1.33	-1.06	-1.07	1.29	-1.08	-1.38	1.38	1.57
514	A_52_P391505	NM_144513	NM_144513	17263	Gtl2	1.57	1.34	-1.03	-1.02	1.05	1.11	-1.09	-1.07	-1.09	1.07	-1.1	-1.04	1.14	1.01	1.18	1.06	1.31	-1	1.28	1.03	1.03	1.01	1.01	1.08	1.05	-1.18	-1.06	-1.06	-1.04	1.18	1.57
515	A_52_P278538	NM_008218	NM_008218	15122	Hba-a1	-1.06	-1.13	-1.06	1.22	1.04	-1.02	1.05	1.05	-1.1	-1.08	-1.01	-1.01	-1.15	-1.07	-1.01	-1.09	-1.57	-1.23	-1.03	1.06	-1.11	1.06	-1.05	-1.03	1.15	-1.07	-1.17	1.22	1.05	-1.08	1.57
516	A_51_P505169	NM_021720	NM_021720	60364	Donson	1.02	1.23	1.13	1.07	1.05	1.09	1.01	-1.01	1.12	1.03	1.07	1.12	1.12	1.09	1.34	1.25	1.57	1.26	1.13	-1.01	1.21	-1.06	1.14	1.11	1.07	1.04	1.1	1.01	1.02	1.05	1.57
517	A_52_P261846	NM_009929	NM_009929	12822	Col18a1	1	1.14	1.34	1.07	1.46	1.57	1.12	-1.04	1.11	1.07	-1.04	1.08	-1.06	-1.03	1.26	1.08	1.45	1.11	-1.22	-1.09	-1.01	-1.13	-1.06	-1.11	1.08	-1.05	1.13	1.02	1.06	1.06	1.57
518	A_52_P148972	BC038320	BC038320	102816	AW986112	1.16	1.56	-1.1	-1.04	1.01	-1.1	-1.24	-1.2	-1.04	-1.23	-1.03	-1.1	1.28	1.08	1.21	1.21	1.07	1	1.53	1.11	1.12	1.12	1.11	1.25	1.02	1.11	1.05	-1.04	1.03	1.23	1.56
519	A_51_P511787	NM_007609	NM_007609	12363	Casp4	-1.04	1.25	1.07	1.21	1.22	1.16	-1.45	-1.21	1.26	-1.05	1.15	1.2	-1.04	-1.17	-1.06	-1.08	1.18	1.07	1.37	1.24	1.32	1.17	1.23	1.42	1.29	1.19	1.56	1.07	1.05	1.45	1.56
520	A_51_P248609	NM_001025365	NM_001025365	28010	D4Wsu114e	1.1	1.25	-1.14	-1.05	1.07	-1.13	-1.18	-1.11	1.07	1.04	1.02	1.03	1.27	-1.11	1.07	1.02	1.11	1.03	1.56	1.26	1.27	1.28	1.18	1.38	1.01	1.05	1.05	1.06	1.04	1.31	1.56
521	A_51_P110529	NM_008882	NM_008882	18845	Plxna2	-1.04	-1.06	1.13	-1	1.19	1.17	1.56	1.37	1.17	-1.01	1.24	1.17	-1.13	-1.11	1.32	-1.12	1.26	-1.01	-1.18	-1.26	1	-1.37	1.14	-1.1	-1.17	-1.06	-1.08	1.01	-1.04	-1.05	1.56
522	A_51_P188073	NM_026400	NM_026400	67838	Dnajb11	-1.05	1.17	1.4	1.09	1.3	1.39	1.04	-1.01	1.04	1.08	1.05	1.08	1.13	1.13	1.29	1.22	1.35	1.29	-1.06	1.03	-1.03	1.08	-1.02	-1.01	1.09	1.18	1.56	1.02	-1.02	1.06	1.56
523	A_51_P127215	BC003348	BC003348	75747	Sesn3	1.01	1.01	-1.2	1.01	-1.22	-1.24	-1.22	-1.08	-1.06	-1.06	1.02	-1.12	-1.39	1.04	-1.56	-1.14	-1.55	-1.18	-1.05	1.11	-1.08	1.04	-1.31	-1.02	1.04	1.14	-1.04	1.01	1.1	1.04	1.56
524	A_51_P139848	NM_011712	NM_011712	22381	Wbp5	-1.13	1.07	1.22	1.06	1.2	1.12	-1.06	1	1.05	1.01	-1.09	-1.03	1.16	1.03	1.27	1.26	1.56	1.36	1.04	-1.04	1.02	1.03	-1.01	-1.05	-1.17	1.19	1.44	1.04	-1.02	1.2	1.56
525	A_51_P219532	AK003388	AK003388	76291	1110003O08Rik	1.35	-1.1	-1.27	1.02	-1.13	-1.23	1.09	1.08	-1.11	1.09	1.13	1.04	-1.07	-1.25	-1.4	-1.32	-1.56	-1.43	1.11	1.16	1.13	1.17	1.14	1.07	-1.11	-1.16	-1.33	1.01	-1.07	1.02	1.56
526	A_51_P356762	NM_008565	NM_008565	17217	Mcm4	-1.15	1.13	1.22	1.07	1.23	1.23	1.03	-1.06	1.06	-1.01	-1.04	-1.06	1.1	1.11	1.14	1.24	1.37	1.33	-1	-1.1	1.04	1.01	1.03	1	-1.01	1.22	1.56	1.01	-1.06	-1.04	1.56
527	A_51_P355765	AK019479	AK019479	20564	Slit3	-1.02	-1.15	-1.18	1.04	-1.13	-1.01	-1.14	-1	-1.19	-1.24	-1.17	-1.27	-1	1.16	-1.25	-1.03	-1.45	-1.2	-1.01	-1.01	1.03	1.07	1.01	-1.05	-1.09	-1.15	-1.56	1.05	1.08	-1.11	1.56
528	A_51_P227004	NM_016904	NM_016904	54124	Cks1b	-1.06	1.24	1.51	1.2	1.45	1.49	1.06	-1.11	1.12	1.17	1.02	-1.08	1.05	-1.04	1.16	1.08	1.56	1.36	1.01	1.05	1.06	1.05	-1.01	-1.02	1.05	1.15	1.55	1.06	1.01	1.15	1.56
529	A_51_P520456	NM_010329	NM_010329	14726	Pdpn	-1.06	1.32	1.56	1.06	1.41	1.5	1.1	-1.13	-1.04	-1.11	-1.11	-1.08	-1.03	1.11	1	1.17	1.33	1.29	-1.18	-1.39	-1.13	-1.28	-1.09	-1.16	-1.1	1.04	1.12	-1.06	-1	-1.07	1.56
530	A_52_P553589	AK081256	AK081256	217830	9030617O03Rik	1	-1	-1.29	1	-1.08	-1.26	-1.08	-1.15	1.07	-1.04	-1.04	-1.06	1.09	-1.1	-1.18	-1.11	-1.03	-1.1	1.56	1.31	1.11	1.15	1.13	1.31	1.03	1.01	1.02	1.1	1.08	1.23	1.56
531	A_51_P416419	NM_007591	NM_007591	12317	Calr	1.01	1.37	1.55	1.08	1.46	1.56	-1	1	1.02	1.16	1.1	1.11	1.01	1.05	1.21	1.17	1.23	1.33	-1.32	1.02	-1.29	1.07	-1.29	-1.17	1.07	1.06	1.34	1.04	1.02	1.03	1.56
532	A_51_P288162	NM_197982	NM_197982	68278	Ddx39	1.09	1.33	1.4	1.08	1.32	1.41	-1.08	-1.09	1.02	1.01	-1.02	1	1.12	-1.19	1.3	1.02	1.56	1.26	-1.01	-1.09	1.01	-1.16	1.06	-1.01	1.05	1.03	1.25	-1.1	-1.12	-1	1.56
533	A_51_P474459	NM_007707	NM_007707	12702	Socs3	-1.05	1.15	1.56	1.14	1.4	1.34	-1.01	1.03	1.14	1.08	1.1	1.19	1.21	1.05	1.37	1.14	1.35	1.36	-1.1	-1.02	-1.06	-1.01	-1.01	-1.05	1.03	1.08	1.32	-1.08	-1.02	1.11	1.56
534	A_52_P463977	NM_197986	NM_197986	68487	1110007F12Rik	-1.09	-1.02	-1.08	-1.09	-1.09	-1.06	-1.13	-1.01	-1.03	-1.04	1.14	1.14	-1.37	-1.05	-1.39	-1.18	-1.55	-1.55	-1.08	1.06	-1.03	1	-1.04	1.04	1.05	1.07	-1.13	-1.23	-1.23	-1.37	1.55
535	A_51_P136820	NM_011179	NM_011179	19156	Psap	1.22	1.29	1.15	1.09	1.02	-1	-1.14	-1.02	1.16	1.06	-1.04	1.24	1.44	-1	-1.14	-1.14	1.35	1.42	-1.1	1.06	-1.13	1.1	-1	-1.02	-1.05	-1.3	-1.55	-1.09	1.18	-1.14	1.55
536	A_52_P138036	M20632	M20632	NA		1.12	1.2	1.3	1.11	1.33	1.41	-1.03	-1.03	-1.05	-1.02	-1.04	-1.07	1.06	-1.02	1.27	1.06	1.55	1.24	1	-1.01	-1.05	-1.22	1.01	-1.04	-1	1.08	1.24	-1.03	-1	-1.03	1.55
537	A_51_P163038	NM_148933	NM_148933	108115	Slco4a1	1.06	1.37	1.55	1.11	1.5	1.25	-1.07	1.02	1.08	-1	1.08	1.14	-1.05	-1.15	1.11	1.03	1.25	1.14	1.12	1.16	1.06	1.11	-1.03	1.11	-1.02	1.05	1.3	-1.06	-1.05	1.21	1.55
538	A_52_P257919	XM_283804	XM_283804	320706	9830001H06Rik	-1.08	-1.09	-1.05	-1.1	-1.09	-1.05	-1.21	-1.15	-1.22	-1.08	1.05	-1.11	1.25	1.09	-1.24	-1.04	-1.21	-1.06	1.43	1.42	1.15	1.55	1.18	1.35	1.06	1.13	-1.11	1.09	1.2	-1.14	1.55
539	A_51_P502872	AK033738	AK033738	NA		-1.19	-1.01	1.26	1	1.29	1.23	1.1	1.01	1.02	1.01	-1.14	-1.08	1.08	-1.01	1.41	1.21	1.4	1.27	1.01	-1.03	1.08	-1.08	-1.08	-1.08	-1.16	1.11	1.55	1	1.02	1.01	1.55
540	A_52_P277592	NM_008503	NM_008503	16898	Rps2	1.1	1.22	1.41	1.08	1.32	1.45	-1.02	-1.08	-1.08	-1	-1.09	-1.06	1.03	-1.11	1.19	1.02	1.55	1.27	-1.07	-1.11	-1.14	-1.16	-1.05	-1.12	1	-1.01	1.16	-1.09	-1.07	-1.12	1.55
541	A_51_P275302	NM_008879	NM_008879	18826	Lcp1	-1.18	1.12	1.16	1	1.06	1.2	-1.01	-1.1	1.21	-1.02	-1.02	1.06	1.08	1.13	1.03	1.32	1.32	1.02	1.03	-1.04	1.09	-1.02	1.29	1.16	1.21	1.42	1.55	1.14	-1.04	1.06	1.55
542	A_51_P282983	NM_144808	NM_144808	213053	Slc39a14	-1.14	1.2	1.55	1.09	1.29	1.35	1.12	1.09	1.2	1.07	1.06	1.1	1.06	1.07	1.17	1.15	1.3	1.42	-1.02	-1.08	1.04	1.01	-1	-1.2	-1.03	1.05	1.29	-1.03	-1.03	1.01	1.55
543	A_51_P305843	NM_025844	NM_025844	66917	Chordc1	-1.03	-1.01	1.08	-1.05	-1.07	-1.01	1.55	1.23	1.09	1.11	1.05	1.21	1.02	1.13	1.54	1.26	1.27	1.2	-1.31	-1.46	-1.12	-1.31	-1.23	-1.45	-1.2	-1.15	-1.04	-1.28	-1.3	-1.08	1.55
544	A_51_P121288	NM_021527	NM_021527	59030	Mkks	1.16	1.04	1.03	1.07	1	1.04	1.2	1.21	1.03	1.07	1.03	1.05	-1.16	1.14	1.15	-1.02	1.1	-1.05	-1.4	-1.54	-1.14	-1.4	-1.18	-1.41	-1.1	-1.1	-1.13	-1.13	-1.06	-1.06	1.54
545	A_52_P662600	NM_019808	NM_019808	56376	Pdlim5	-1.09	-1.16	1.01	1.06	1.12	-1.02	1.51	1.4	1.04	1.12	1.21	1.16	-1	-1.01	1.5	1.08	1.11	1.16	-1.47	-1.29	-1.5	-1.34	-1.3	-1.54	-1.17	1.06	1.05	1.04	-1.13	-1	1.54
546	A_51_P103659	NM_009450	NM_009450	22151	Tubb2a	1.11	1.4	1.54	1.16	1.29	1.4	1.17	1.02	-1.05	1.15	-1.03	1.01	1.12	1.08	1.31	1.08	1.39	1.43	-1.3	-1.19	-1.27	-1.1	-1.24	-1.31	1.06	-1.04	1.06	-1.01	1	-1.17	1.54
547	A_52_P625277	NM_183220	NM_183220	329470	2610203E10Rik	-1.12	1.07	-1.21	-1.06	-1.14	-1.2	-1.45	-1.28	-1.11	-1.19	-1.09	-1.27	1	-1.01	-1.2	-1.03	-1.02	-1.17	1.54	1.43	1.26	1.17	1.23	1.53	1.1	1.1	1.01	1.12	1.24	1.15	1.54
548	A_51_P321965	NM_023464	NM_023464	68475	Ssna1	1.07	-1	1.13	1.02	1.06	1.12	-1.04	-1.06	-1.08	1.03	-1.07	1.02	-1.54	-1.42	-1.43	-1.44	-1.31	-1.35	-1.37	-1.09	-1.34	-1.15	-1.42	-1.22	-1.02	-1.06	-1.04	1.04	-1.05	1.01	1.54
549	A_51_P162162	NM_009349	NM_009349	21743	Inmt	1.12	-1.11	-1.34	-1.03	-1.15	-1.18	-1.03	1.06	-1.26	-1.14	-1	-1.11	-1.07	-1.02	-1.17	-1.1	-1.52	-1.33	1.02	1.03	-1.01	-1.09	1.07	-1.03	-1.13	-1.08	-1.54	-1	-1.03	-1.32	1.54
550	A_52_P283910	AK011143	AK011143	50926	Hnrpdl	-1.11	1.11	-1.04	-1.09	1.01	-1.11	-1.17	-1.06	1.03	-1.2	-1.03	-1.16	1.28	1.12	1.22	1.27	1.2	1.25	1.54	1.07	1.24	1.18	1.21	1.34	-1.09	1.1	1.18	1.03	1.11	1.12	1.54
551	A_51_P251256	NM_009195	NM_009195	20498	Slc12a4	1.02	1.13	1.1	1.04	1.1	1.1	1.04	1.01	-1	-1.03	-1.13	-1.03	1.22	1.1	1.37	1.07	1.54	1.24	-1.1	-1.02	-1.08	-1.27	-1.02	-1.09	1.03	1.15	1.08	-1.04	1.01	-1.1	1.54
552	A_52_P570583	NM_027532	NM_027532	75430	3200002M19Rik	1.07	1.15	1.38	1.13	1.49	1.54	1.01	-1.04	1.1	1.05	1.01	1.03	-1.1	-1.15	1.08	1	1.25	1.2	-1.06	-1	1	-1.03	-1.04	-1.04	1.08	1.04	1.28	1.05	1.01	1.12	1.54
553	A_52_P497503	ENSMUST00000078297	XM_903693	NA		1.11	1.2	1.36	1.08	1.3	1.46	-1.03	-1.09	-1.08	-1.01	-1.09	-1.07	-1.1	-1.14	1.12	1.04	1.54	1.18	-1.04	-1.02	-1.05	-1.19	1	-1.02	1.07	1.01	1.19	-1.04	-1.02	-1.08	1.54
554	A_51_P384673	NM_133807	NM_133807	98238	Lrrc59	1.07	1.3	1.5	1.09	1.32	1.54	1.06	1.02	-1.02	1.09	1.03	1.1	-1.15	-1.24	1.04	-1.05	1.3	1.08	-1.28	-1.15	-1.14	-1.24	-1.06	-1.24	1.01	-1.13	1.07	-1.08	-1.09	-1.02	1.54
555	A_52_P373912	XM_983688	XM_983688	666415	LOC666415	-1.19	-1.52	-1.54	-1.13	-1.25	-1.39	1.16	-1.02	-1.2	-1.03	-1.14	1.01	1.09	-1.19	1.12	-1.08	-1.06	1.17	1.18	1.14	1.38	1.3	1.23	-1.12	-1.13	-1.15	-1.1	1.07	1.05	1.11	1.54
556	A_52_P182919	NM_054098	NM_054098	117167	Steap4	1.06	1.29	1.52	1.13	1.31	1.54	-1.03	-1.04	1.2	1.08	1.14	1.19	1.08	-1.02	1.13	1.11	1.19	1.12	-1.02	-1.04	1.03	-1.07	1.05	-1.01	1.11	-1.01	1.02	1.02	-1	1.05	1.54
557	A_52_P328621	NAP043130-1		NA		-1.35	-1.39	-1.37	-1.13	-1.5	-1.54	-1.18	-1.05	-1.41	-1.24	-1.09	-1.18	-1.08	-1.04	-1.06	-1.17	-1.25	-1.33	-1.01	1.04	1.21	1.09	1.08	1.16	-1.23	-1.07	-1.18	-1.05	1.01	-1.09	1.54
558	A_51_P437426	NM_146069	NM_146069	224109	Lrrc33	-1.09	1.2	1.14	-1.1	-1.02	1.09	-1.09	-1.07	1.03	1.17	1.03	1.12	1.33	1.19	1.31	1.27	1.49	1.53	1.04	-1.11	1	-1.03	1.16	1.02	1.11	-1.03	1.15	1.09	1.1	-1.1	1.53
559	A_51_P418935	AK004524	AK004524	415115	Neurl2	1.32	1.14	-1.12	-1.06	-1.05	-1.12	-1.12	-1.09	-1.11	1.18	1.15	1.07	-1.03	-1.15	-1.22	-1.2	-1.2	-1.28	1.53	1.38	1.17	1.3	1.22	1.4	1.15	-1.04	1.02	-1.08	-1.04	1.23	1.53
560	A_52_P546090	NM_009279	NM_009279	20832	Ssr4	1.09	1.18	1.38	1.12	1.37	1.53	-1.03	-1.1	-1	-1.04	-1.11	-1.02	1.05	-1.1	1.2	-1.01	1.49	1.33	1.04	1.05	1.06	1.01	1.04	1.03	1.1	1.02	1.28	1.02	1.06	1.05	1.53
561	A_52_P163796	NM_011655	NM_011655	22154	Tubb5	1	1.26	1.45	1.1	1.32	1.53	1.12	-1.02	-1.01	1.05	-1.02	-1.01	-1.11	1.01	1.21	1.11	1.53	1.21	-1.36	-1.1	-1.23	-1.2	-1.21	-1.2	1.03	1.11	1.34	1	-1.01	-1	1.53
562	A_51_P503953	NM_027993	NM_027993	71901	2310028H24Rik	1.1	1.19	1.32	1.04	1.19	1.33	1.29	1.2	1.18	1.05	1.25	1.12	1.04	1.09	1.4	1.15	1.53	1.07	-1.24	-1.01	-1.17	-1.23	-1.16	-1.09	1.08	1.13	1.26	-1.01	-1.06	-1.06	1.53
563	A_52_P97192	NM_026170	NM_026170	67458	1200007D18Rik	-1.11	-1.01	1.26	-1.08	1.21	1.15	1.12	1.07	1.07	1.07	1.02	1.04	1.21	1.13	1.31	1.25	1.53	1.48	-1.19	-1.05	-1.14	1.01	-1.17	-1.16	-1.12	-1.06	1.01	-1.02	1.12	-1.03	1.53
564	A_51_P362278	NM_008503	NM_008503	16898	Rps2	1.1	1.18	1.35	1.02	1.33	1.34	1.02	-1.05	1	1.06	1.01	-1	1.18	1.05	1.37	1.18	1.53	1.36	-1.01	-1.04	-1.04	1.02	-1.05	-1.02	-1.02	1.06	1.28	-1.02	-1.05	-1.09	1.53
565	A_51_P209372	NM_025436	NM_025436	66234	Sc4mol	-1.03	-1.03	1.21	-1.2	1.06	1.11	-1.12	-1.02	1.1	-1.16	-1.2	1	-1.01	1.11	1.22	1.34	1.21	1.24	-1.01	-1.03	1.1	1.14	1.1	1.02	-1	1.1	1.53	-1.14	-1.05	1.19	1.53
566	A_51_P508289	NM_010145	NM_010145	13849	Ephx1	1.04	-1.13	-1.3	1.03	-1.2	-1.25	1.09	1.08	-1.26	-1.09	-1.13	-1.05	1.12	-1.1	-1.14	-1.12	-1.31	-1.23	1.04	1.12	1.12	1.13	1.2	1.08	-1.09	-1.28	-1.53	-1.07	-1.09	-1.1	1.53
567	A_51_P325904	NM_008381	NM_008381	16324	Inhbb	-1.53	-1.52	-1.32	-1.08	-1.32	-1.26	-1.12	-1.04	1.06	-1.07	-1.08	-1.2	-1.17	1.1	-1.01	1.09	1.03	1.02	1.04	1.18	1.09	1.09	-1.02	1.24	1.07	1.03	1.04	1.22	1.12	1.33	1.53
568	A_51_P329322	NM_025512	NM_025512	66361	Zfand1	1.04	1.04	-1.15	-1.06	-1.12	-1.16	-1.25	-1.12	-1.09	-1.18	-1.06	-1.21	-1.32	-1.16	-1.53	-1.19	-1.24	-1.29	1.22	1.22	1.04	1.04	1	1.28	1.12	1.09	1.04	1.03	1.11	1.15	1.53
569	A_52_P512672	NM_030241	NM_030241	67956	Setd8	1.13	1.24	1.36	1.16	1.39	1.4	1.11	1.01	1.34	1.19	1.05	1.18	-1.08	1.07	1.08	1.19	1.52	1.21	-1.04	-1.03	1.09	-1.14	1.22	1.02	1.21	1.24	1.53	1.21	1.11	1.41	1.53
570	A_51_P232778	NM_019661	NM_019661	56418	Ykt6	1.07	1.16	1.38	1.12	1.3	1.37	1.12	1.07	1.11	1.01	-1.03	1.03	1.1	1.08	1.2	1.07	1.53	1.34	-1.16	-1.11	-1.14	-1.05	-1.1	-1.18	-1	-1.03	1.25	-1.01	-1.05	-1	1.53
571	A_51_P276051	NM_174850	NM_174850	231830	A930021H16Rik	1.05	1.22	1.27	1.16	1.37	1.27	-1.38	-1.15	1.17	1.02	1.03	1.14	-1.01	-1.18	-1.13	1.02	1.1	1.1	1.23	1.48	1.19	1.4	1.13	1.33	1.05	1.12	1.52	1.04	1.15	1.53	1.53
572	A_51_P511250	NM_175307	NM_175307	100342	4732473B16Rik	1.52	1.04	-1.04	1.19	1.33	1.14	1.41	1.28	-1.02	1.03	1.04	1.17	-1.1	-1.13	1.3	1.06	1.03	-1.01	-1.15	-1.28	1.15	-1.21	1.35	-1.05	-1.22	-1.11	-1.06	-1.16	-1.26	1.02	1.52
573	A_52_P440265	ENSMUST00000094445	AK020331	NA		1.11	1.09	-1.03	-1.04	1.01	-1.01	1.52	1.15	1.07	-1.01	1.07	-1.07	1.14	1.21	1.37	1.08	1.01	1.04	-1.22	-1.43	-1.18	-1.28	-1.14	-1.29	-1.03	1.08	-1.06	-1.07	-1.16	-1.12	1.52
574	A_52_P661071	XM_981289	XM_981289	670438	LOC670438	1.24	1.32	1.05	1.06	1.06	1.04	-1.12	-1.06	-1.03	-1.09	1.04	-1.11	1.18	1.03	1.17	1.11	1.15	1.02	1.52	1.14	1.42	1.11	1.41	1.41	1.05	1.05	-1.09	-1.02	-1.02	1.06	1.52
575	A_52_P471143	AK151452	AK151452	433813	Pusl1	1.14	1.15	1.11	-1.01	1.08	1.12	-1	-1.12	-1.15	-1.08	-1.11	-1.1	1.31	-1	1.31	1.09	1.52	1.16	1.1	-1.1	1.04	-1.11	1.17	1.07	-1.02	-1.08	1.05	-1.05	-1.05	-1.13	1.52
576	A_51_P164835	NM_008909	NM_008909	19041	Ppl	1.32	-1.04	-1.23	1.04	-1.17	-1.26	-1.02	1.02	-1.21	-1.06	-1.04	-1.14	1.08	-1.17	-1.08	-1.23	-1.18	-1.19	-1.01	-1.17	-1.04	-1.05	-1.03	-1.13	-1.14	-1.24	-1.52	-1.07	-1.06	-1.24	1.52
577	A_51_P217227	XM_001004490	XM_001004490	668212	LOC668212	-1.09	1.15	1.23	-1.09	1.03	1.11	1.08	-1.06	1.12	1.04	-1.01	1	1.3	1.12	1.38	1.22	1.52	1.49	-1.1	-1.33	-1.02	-1.1	-1.05	-1.14	-1.04	1.01	1.19	-1.02	1.01	-1.02	1.52
578	A_51_P323620	NM_144543	NM_144543	77862	Thyn1	-1.07	1.23	1.32	1.08	1.38	1.39	-1.06	-1.08	1.12	-1.01	-1.03	-1.01	-1.06	-1.02	1.33	1.1	1.52	1.17	-1	-1.01	1.11	-1.26	1.06	1.05	1.09	1.22	1.51	1.01	1.05	1.23	1.52
579	A_51_P434803	NM_009187	NM_009187	20463	Cox7a2l	1.06	-1.05	-1.24	-1.01	-1.32	-1.39	-1.04	-1	-1.11	1.02	-1.06	-1.03	-1.07	-1.15	-1.36	-1.27	-1.52	-1.14	-1.12	-1.04	-1.14	1.03	-1.19	-1.15	1.08	-1.07	-1.31	1.26	1.11	1.01	1.52
580	A_51_P382789	NM_027025	NM_027025	69296	1700001D09Rik	1	1.2	1.52	1.15	1.33	1.38	1.04	1.03	1.19	-1	1.02	1.07	-1.02	1	1.21	1.02	1.44	1.1	1.15	1.06	1.15	1.01	1.2	1.22	-1.02	1.07	1.15	-1.03	-1.03	1.03	1.52
581	A_51_P329711	NM_177960	NM_177960	319554	Idi1	1.07	1.07	1.37	-1.04	1.25	1.33	-1.03	1.15	1.13	1.01	-1.05	1.07	1.01	1.07	1.28	1.3	1.15	1.26	-1.1	-1.15	1.01	1.08	-1.1	-1.1	-1.08	1.1	1.52	-1.17	-1.11	1.17	1.52
582	A_51_P434101	NM_022331	NM_022331	64209	Herpud1	1.24	1.03	-1.04	1.08	-1.03	-1.12	1.52	1.16	-1.07	1.02	1.07	1.1	1.01	-1.23	1.1	-1.15	-1.02	-1.07	-1.16	-1.31	1.09	-1.27	1.13	-1.28	-1.17	-1.08	-1.18	-1.06	-1.18	1.02	1.52
583	A_52_P16136	AK017596	AK017596	52902	D10Bwg1070e	-1.29	-1.25	-1.28	-1.02	-1.26	-1.52	-1.04	-1.01	-1.06	-1.03	1.02	-1	-1.38	-1.18	-1.39	-1.18	-1.39	-1.45	1.05	1.09	1.12	1.09	1.02	1.1	1.01	1.06	-1.06	1.12	1.11	1.11	1.52
584	A_52_P46085	NM_080638	NM_080638	78388	Mvp	1.22	1.48	1.52	1.1	1.41	1.42	-1.01	-1	1.08	1.07	-1.03	1.15	1.03	-1.05	1.24	1.2	1.45	1.3	-1.17	-1.03	-1.09	-1.17	-1.11	-1.2	1.09	1.01	1.06	-1.1	-1.08	-1.11	1.52
585	A_51_P128229	AK150226	AK150226	52009	D17Ertd441e	1.06	1.26	1.44	1.13	1.36	1.39	1.08	1.09	1.21	1.1	1.07	1.09	-1.03	1	1.07	1.08	1.15	-1	1.03	1.03	1.07	-1.02	1.1	1.14	1.06	1.14	1.52	1.1	1.06	1.11	1.52
586	A_51_P218137	AK008925	AK008925	70152	Mettl7a	-1	-1.2	-1.52	-1.17	-1.24	-1.37	1.09	1.18	1.01	1.07	1.18	1.07	1.24	1.25	-1.06	1.03	-1.12	-1.29	1.19	-1.04	1.14	-1.03	1.23	1.13	1.05	-1.04	-1.18	-1.08	-1	-1.04	1.52
587	A_52_P13109	AK163452	AK163452	11669	Aldh2	-1.03	-1.1	-1.41	-1.1	-1.24	-1.21	1.18	1.15	-1.1	-1.06	1.11	-1.1	-1.02	1.05	-1.07	-1.14	-1.34	-1.37	-1.02	1.13	1.03	1.13	1.09	1.02	-1.09	-1.05	-1.52	-1.09	-1.06	-1.21	1.52
588	A_51_P153079	BC021404	BC021404	101100	Ttll3	-1.21	-1.34	-1.52	-1.16	-1.18	-1.32	-1	1.01	-1.08	-1.12	-1.03	-1.05	-1.19	-1.28	1.03	-1.3	-1.29	-1.31	1.05	1.02	1.03	1.05	1.03	1.04	-1.17	-1.09	-1.08	-1.05	-1.15	1.15	1.52
589	A_52_P470017	NM_028802	NM_028802	74182	Prei4	1.12	1.18	-1.14	1.02	-1.09	-1.14	-1.18	-1.24	1.02	-1.09	1.05	-1.14	1.05	1.01	-1.11	-1.02	1	-1.12	1.48	1.39	1.22	1.12	1.27	1.45	1.4	1.52	1.19	1.12	1.15	1.08	1.52
590	A_52_P106259	NM_207655	NM_207655	13649	Egfr	1.04	-1.07	-1	-1.03	1.01	1.03	1.12	1.24	1.07	1.16	1.44	1.24	-1.28	-1.06	-1.36	-1.13	-1.52	-1.29	-1.11	-1.05	-1.13	-1.19	-1.27	-1.14	-1.03	-1.16	-1.24	-1.01	-1.1	-1.11	1.52
591	A_52_P387237	NM_011303	NM_011303	20148	Dhrs3	1.02	-1.09	-1.2	-1.07	-1.21	-1.18	-1.09	1.03	1.04	1.05	1.09	1.03	1.03	-1.02	-1.31	-1.1	-1.51	-1.27	1.01	1.27	-1.1	1.25	-1.18	1.03	1.18	1.02	-1.15	1.07	1.09	1.03	1.51
592	A_52_P612137	NM_009822	NM_009822	12395	Runx1t1	-1.07	-1.03	-1.12	-1.05	-1.07	-1.1	-1.11	-1.04	-1.13	-1.03	1.11	-1.02	-1.18	1.1	-1.4	-1.2	-1.51	-1.37	1.01	1.27	-1.16	1.29	-1.19	1.05	1.02	1.11	-1	-1.02	1.04	-1.14	1.51
593	A_52_P291588	NM_008020	NM_008020	14227	Fkbp2	-1.01	1.18	1.43	1	1.35	1.43	-1.05	-1.11	1.01	-1.01	-1.04	-1.01	1.13	1.07	1.37	1.26	1.51	1.36	-1.08	1	-1.13	-1.02	-1.14	-1.09	1.07	1.07	1.26	-1.17	-1.08	-1.22	1.51
594	A_52_P76196	XM_902301	XM_902301	546797	LOC546797	1.14	1.16	1.39	1.1	1.34	1.48	1.02	-1.03	-1.02	1.03	-1.05	1	-1.26	-1.19	1.09	-1.01	1.51	1.2	-1.07	1.05	1.02	-1.14	-1.01	-1.07	1.15	-1.01	1.19	1	1.03	-1.01	1.51
595	A_51_P315795	NM_009451	NM_009451	22153	Tubb4	1	1.26	1.46	1.14	1.33	1.51	1.12	-1.01	1.03	1.09	-1.02	1.03	-1.2	-1.13	1.04	-1.13	1.34	1.13	-1.32	-1.07	-1.27	-1.26	-1.27	-1.3	1.08	1.05	1.14	-1.01	1.03	-1.06	1.51
596	A_52_P10622	NM_010330	NM_010330	13723	Emb	-1.05	-1.19	-1.23	1.08	-1.08	-1.19	-1.13	1.02	-1.04	-1.12	-1.04	-1.06	-1.37	-1.07	-1.51	-1.2	-1.49	-1.31	-1.18	-1.04	-1.16	1	-1.24	-1.08	-1.17	1.06	-1.06	1.23	-1.07	1.02	1.51
597	A_52_P26794	NM_027395	NM_027395	70350	Basp1	-1.01	1.16	1.51	1.18	1.42	1.31	-1.07	-1.18	1.05	1.09	-1.1	1.26	-1.28	-1.3	-1.06	-1.27	-1.04	1.12	1.02	1.1	1.02	1.15	-1.12	-1.04	-1.08	-1.18	1.1	-1.1	-1.06	1.25	1.51
598	A_52_P196732	NM_021606	NM_021606	59126	Nek6	-1.03	1.33	1.51	1.12	1.24	1.27	-1.04	-1.04	1.27	1.09	1.07	1.17	1.1	-1.2	1.04	-1.04	1.37	1.29	-1.16	-1.12	-1.08	-1.02	-1.02	-1.18	-1.11	1.01	1.12	-1.01	1.07	1.13	1.51
599	A_51_P354804	NM_080643	NM_080643	140721	Caskin2	-1.13	-1.09	1.01	-1.13	-1.08	-1.06	1.38	1.19	-1.08	1.01	1.12	1.1	1.19	1.02	1.51	1.12	1.22	1.16	-1.18	-1.16	-1.12	-1.09	1.03	-1.22	-1.12	-1.06	-1.13	-1.4	-1.32	-1.41	1.51
600	A_52_P625007	TC1445810		NA		1.08	1.17	1.31	1.06	1.28	1.38	-1.04	-1.06	-1.06	-1.02	-1.06	-1.08	1.08	-1.09	1.22	1.01	1.51	1.29	-1.07	-1.04	-1.13	-1.1	-1.08	-1.13	-1.04	-1	1.15	-1.08	-1.06	-1.08	1.51
601	A_52_P623413	ENSMUST00000094817	AK029093	NA		-1.51	-1.36	1.04	-1.16	-1.12	-1.02	1.06	1.04	-1.19	-1.09	1.09	-1.05	1.02	1.15	-1.05	1.15	-1.05	-1.1	-1.02	1.09	1.04	-1.02	1.04	1.1	-1	1.07	1.03	-1.05	-1.05	-1.09	1.51
602	A_51_P333111	NM_009676	NM_009676	11761	Aox1	1.11	-1.05	-1.51	1.04	-1.14	-1.12	-1.3	-1.15	-1.23	-1.14	1	-1.22	-1.07	-1.28	-1.37	-1.16	-1.47	-1.49	1.21	1.38	-1.04	1.1	-1.05	1.28	1.06	-1.09	-1.29	-1	-1.02	1.03	1.51
603	A_51_P403536	NM_175641	NM_175641	108075	Ltbp4	1.04	-1.12	-1.39	1.01	-1.22	-1.15	1.01	-1.01	-1.31	-1.07	-1.06	-1.15	1.1	1.13	-1.05	-1.05	-1.51	-1.19	-1.06	1	-1.11	1.14	-1.13	-1.1	1.04	-1.01	-1.43	1.02	1	-1.38	1.51
604	A_52_P379505	ENSMUST00000081227	XR_002499	NA		1.08	1.12	1.3	1.08	1.26	1.4	-1.01	-1.07	-1.05	1.03	-1.06	-1.04	-1.01	-1.17	1.11	-1.01	1.51	1.21	-1.01	1.02	-1.01	-1.1	-1.02	-1.05	-1	-1.08	1.05	-1.04	-1.03	-1.07	1.51
605	A_52_P134762	AK172505	AK172505	15950	Ifi203	-1.42	-1.07	-1.13	1.03	-1.42	-1.38	-1.48	-1.2	1.03	-1.27	1.15	1.16	-1.16	-1.09	1.05	-1.18	1.11	-1.13	1.05	1.19	1.51	1.17	1.22	1.29	1.05	-1.15	-1.29	-1.07	1.03	1.07	1.51
606	A_51_P488890	NM_013632	NM_013632	18950	Pnp	1.04	1.17	1.29	1.01	1.09	1.23	1.06	-1.03	1.14	1.06	1.07	1.2	-1.3	-1.3	-1.18	-1.32	1.08	1.02	-1.51	-1.46	-1.24	-1.35	-1.16	-1.33	1.05	-1.12	1.02	-1.17	-1.18	-1.14	1.51
607	A_52_P267256	XM_001004891	XM_001004891	673182	LOC673182	1.1	1.07	-1.11	-1.06	-1.19	-1.15	-1.09	-1.04	-1.15	-1.07	-1.18	-1.07	-1.09	-1.36	-1.33	-1.4	-1.29	-1.1	-1.23	-1.2	-1.32	-1.21	-1.38	-1.37	-1.17	-1.26	-1.51	-1.11	-1.03	-1.19	1.51
608	A_52_P184149	NM_008638	NM_008638	17768	Mthfd2	-1.04	1.31	1.51	1.21	1.37	1.37	1.02	-1.07	1.19	1.11	1.03	1.12	1.07	-1.09	1.11	1.02	1.28	1.5	-1.1	1.06	-1.02	-1.02	-1.08	-1.13	1	1.12	1.36	1.08	1.03	1.2	1.51
609	A_52_P281172	BC056501	BC056501	106068	Slc45a4	-1.02	-1.04	1.06	1.07	1.09	1.11	-1.51	-1.4	-1.17	-1.12	-1.14	-1.26	1.24	-1	-1.08	-1.03	1.18	1.11	1.33	1.17	1.14	1.19	1.32	1.33	-1.02	1.06	-1	1.1	1.29	1.18	1.51
610	A_51_P171999	NM_009696	NM_009696	11816	Apoe	-1.01	-1.18	-1.34	1	-1.18	-1.23	1.02	1.09	1.17	1.05	1.1	1.24	-1.04	1.04	-1.09	1.03	-1.31	-1.14	-1.05	1.05	1.11	-1.02	1.14	1.1	1.15	-1.23	-1.51	1.24	1.09	1.09	1.51
611	A_51_P364609	NM_019699	NM_019699	56473	Fads2	1.06	1.18	1.4	1.07	1.42	1.4	1.07	1.08	1.05	-1.04	-1.02	-1.02	1.18	1.03	1.32	1.16	1.51	1.43	-1.06	-1.03	1.01	-1.01	-1.12	-1.03	-1.07	-1.02	1.23	1.03	1.15	1.07	1.51
612	A_51_P379710	NM_133933	NM_133933	103963	Rpn1	-1.08	1.26	1.39	1.15	1.49	1.38	1.04	1.08	1.02	1.02	1.05	-1	1.11	1.1	1.24	1.15	1.35	1.41	-1.07	1	-1.17	1.06	-1.2	-1.1	-1.1	1.17	1.5	-1.01	1.02	1.05	1.5
613	A_51_P285077	NM_029095	NM_029095	74770	Gup1	1.5	1.06	-1.07	-1.23	-1.13	1.13	1.22	1.1	1.06	1.33	1.14	1.19	-1.01	-1.11	-1.15	-1.08	-1.2	-1.34	1.24	1.18	-1.03	1.13	1.03	1.28	-1.06	-1.29	-1.08	-1.25	-1.2	1.15	1.5
614	A_51_P341717	AF251703	AF251703	246746	Cd300lf	1.01	1.36	1.21	1.06	1.14	1.07	-1.11	-1.14	1.21	-1.11	1.07	1.07	1.24	-1.04	1.32	1.11	1.5	1.25	1.09	-1.02	1.03	-1.03	1.19	1.17	1.12	1.11	1.12	1.09	1.05	1.08	1.5
615	A_52_P112641	NM_198611	NM_198611	231727	B3gnt4	1.09	1.12	-1.44	-1.1	-1.2	-1.4	-1.11	-1.01	-1.17	-1.08	-1.03	-1.17	-1.02	-1.31	-1.14	-1.09	-1.23	-1.34	1.5	1.26	1.15	1.27	1.12	1.43	-1.16	-1.03	1.05	-1.08	-1.2	1.28	1.5
616	A_52_P1092823	AK133937	AK133937	16371	Irx1	1.14	1.01	-1.07	1.03	-1.02	-1.1	1.18	1.21	1.42	1.16	-1.1	1.16	1.2	1.37	1.5	1.21	1.41	1.22	-1.11	-1.45	1.25	-1.14	1.23	-1.15	-1.3	1.05	1.01	-1.05	-1.01	1.07	1.5
617	A_52_P680827	NM_172961	NM_172961	268860	Abat	1.05	-1.02	-1.12	-1.03	1.02	1.15	-1.05	1.22	-1.04	1.05	1.15	-1.12	-1.2	-1.05	-1.5	-1.11	-1.39	-1.35	1.03	1.12	-1.01	-1.01	-1.04	1.12	1.12	-1.16	-1.26	-1.06	-1.05	-1.04	1.5
618	A_51_P211980	NM_019492	NM_019492	50780	Rgs3	-1.12	-1.04	-1.1	-1.03	-1.09	-1.14	-1.28	-1.25	-1.2	-1.12	1.04	-1.1	1.22	-1.04	-1.29	-1.11	-1.23	-1.16	1.49	1.5	1.15	1.48	1.2	1.41	1.18	1.25	1.11	1.04	1.15	-1.14	1.5
619	A_51_P469098	NM_133215	NM_133215	170749	Mtmr4	-1.06	-1.14	1.11	-1.19	-1.05	1.07	1.5	1.17	1.05	1.21	1.16	1.27	-1.1	-1.02	1.14	1.04	-1.01	-1.07	-1.16	-1.12	-1.05	-1.1	-1.02	-1.17	1.04	1.02	1.02	-1.18	-1.28	-1.17	1.5
620	A_51_P365854	NM_177632	NM_177632	224093	BC022623	-1.1	-1.12	-1.02	-1.14	-1.11	-1.16	-1.05	1.13	-1.16	1.03	1.19	1.1	1.06	1.02	-1.21	-1.08	-1.5	-1.25	1.08	1.33	-1.02	1.34	-1.06	1.08	1.02	1.01	-1.06	-1.05	-1.12	-1.04	1.5
621	A_52_P391095	NM_013498	NM_013498	12916	Crem	-1.01	-1.13	-1.07	-1.08	-1.19	-1.06	1.22	1.17	1.12	1.13	1.17	1.17	1.22	1.11	1.31	1.04	1.19	1.18	-1.48	-1.39	-1.36	-1.36	-1.38	-1.5	-1.13	-1.12	-1.26	-1.17	-1.17	-1.08	1.5

## Sheet: Table S2
Table S2. Values of TRI1-TRI29 calculated based on PCs.
	TRI1( PC1)	TRI2	TRI3	TRI4	TRI5	TRI6	TRI7	TRI8	TRI9	TRI10	TRI11	TRI12	TRI13	TRI14	TRI15	TRI16	TRI17	TRI18	TRI19	TRI20	TRI21	TRI22	TRI23	TRI24	TRI25	TRI26	TRI27	TRI28	TRI29
NP_1	-0.132569	0.0104344	-0.00850549	-0.0627183	0.0640891	0.127391	0.248472	0.262418	0.254195	0.278992	0.272981	0.277394	0.26377	0.261748	0.257724	0.248641	0.229347	0.223563	0.223301	0.226326	0.224723	0.218492	0.215166	0.207204	0.209828	0.211261	0.210882	0.210986	0.211137
NP_2	0.268876	0.225232	0.205718	0.226456	0.238808	0.27866	0.316716	0.320842	0.313136	0.320917	0.314101	0.312083	0.312264	0.311814	0.324151	0.330788	0.32895	0.331559	0.335967	0.341096	0.326003	0.345287	0.368029	0.386423	0.380981	0.381674	0.38162	0.381673	0.381074
NP_3	0.47799	0.495379	0.437456	0.456343	0.450219	0.468781	0.451598	0.44251	0.419362	0.396619	0.407486	0.408615	0.40796	0.403124	0.392427	0.398169	0.395707	0.389548	0.391578	0.391125	0.392443	0.386956	0.38827	0.383177	0.380331	0.390494	0.377023	0.376728	0.366817
NP_4	0.15314	0.175092	0.167507	0.193956	0.250394	0.259674	0.263401	0.26254	0.233748	0.223814	0.20021	0.198776	0.17314	0.174806	0.196153	0.182098	0.223345	0.240398	0.254716	0.249172	0.262046	0.268799	0.262687	0.26125	0.263418	0.260801	0.257722	0.25879	0.25917
NP_5	0.425999	0.42635	0.355653	0.372674	0.391333	0.435359	0.421692	0.407986	0.377399	0.360693	0.363493	0.364628	0.365148	0.357727	0.351814	0.368626	0.369523	0.368957	0.362541	0.363143	0.363814	0.358674	0.352119	0.354009	0.35231	0.340131	0.357493	0.353119	0.348893
NP_6	0.437748	0.460707	0.377221	0.396144	0.396849	0.432888	0.426284	0.408271	0.386158	0.362754	0.379413	0.378731	0.379452	0.366362	0.355264	0.378794	0.378104	0.377916	0.3735	0.377388	0.380428	0.38045	0.376754	0.374284	0.370259	0.376641	0.373451	0.376976	0.388298
NP_7	-0.0941814	0.290706	0.369866	0.32692	0.337985	0.346151	0.289564	0.253197	0.302101	0.281703	0.265787	0.275601	0.265268	0.240059	0.267537	0.27789	0.263486	0.251422	0.264065	0.264459	0.267335	0.269921	0.271003	0.269494	0.268705	0.268011	0.268873	0.269188	0.268922
NP_8	-0.353096	0.0456823	0.049357	0.00590125	-0.0160483	0.000951062	-0.00768194	-0.0721145	-0.0968733	-0.0831021	-0.0873791	-0.0926615	-0.0633971	-0.0325861	-0.0575521	-0.0630033	-0.0458947	-0.0442928	-0.0483898	-0.0483295	-0.0491242	-0.0508212	-0.0458728	-0.0416832	-0.0387021	-0.0371567	-0.036415	-0.0354402	-0.0354231
NP_9	0.204107	0.203877	0.154256	0.144095	0.100937	0.0425873	0.0323158	0.0409329	0.0331368	0.0641989	0.0655914	0.0675943	0.0640803	0.0683774	0.0630678	0.0540218	0.0580114	0.0450241	0.0741327	0.105707	0.0943304	0.0914635	0.0827191	0.081681	0.0789648	0.0756203	0.0757736	0.0757275	0.0764529
NP_10	0.0082278	0.212588	0.112776	0.0933624	0.126296	0.107493	0.0816066	0.125394	0.172009	0.202394	0.257832	0.245334	0.24012	0.227075	0.23196	0.231484	0.245242	0.263007	0.246889	0.2532	0.254813	0.254189	0.255348	0.258062	0.259659	0.258226	0.257193	0.256895	0.255705
NP_11	-0.102203	-0.000971399	-0.134605	-0.17679	-0.259151	-0.30807	-0.272929	-0.254349	-0.263924	-0.308573	-0.310937	-0.277296	-0.283651	-0.259971	-0.243799	-0.24992	-0.270407	-0.245298	-0.248609	-0.246042	-0.248187	-0.249531	-0.250911	-0.250147	-0.246009	-0.24513	-0.244488	-0.245458	-0.245165
NP_12	0.080663	0.173045	0.0503639	-0.0489873	-0.080511	-0.163465	-0.161616	-0.115637	-0.142863	-0.128767	-0.135468	-0.134858	-0.13197	-0.147312	-0.155226	-0.163239	-0.161967	-0.186453	-0.187114	-0.213451	-0.210231	-0.201734	-0.196782	-0.200311	-0.203123	-0.206261	-0.204801	-0.203641	-0.202736
NP_13	-0.0189039	-0.01538	0.175345	0.145835	0.124062	0.14249	0.145498	0.213682	0.230813	0.220231	0.204938	0.249018	0.241276	0.241245	0.215865	0.234458	0.255439	0.251765	0.24427	0.249872	0.248432	0.243044	0.248906	0.24817	0.250043	0.24693	0.245485	0.246068	0.246251
NP_14	-0.267239	-0.168227	0.00396988	0.0964023	-0.00800988	-0.0337441	0.0210154	0.0327952	-0.0154786	-0.00176253	0.00871641	-0.0255371	-0.037368	-0.052773	-0.0339108	-0.0152078	-0.0178664	-0.0160578	-0.0184147	-0.0201313	-0.0192924	-0.0280093	-0.028339	-0.0274893	-0.0250213	-0.0249325	-0.0253499	-0.025502	-0.0258674
NP_15	0.333845	0.33944	0.462083	0.428579	0.431547	0.43823	0.436858	0.437582	0.445313	0.440978	0.44382	0.433428	0.452248	0.466949	0.472107	0.457922	0.450486	0.451978	0.445465	0.440182	0.438588	0.439444	0.434731	0.433719	0.423986	0.41241	0.402437	0.391084	0.394154
NP_16	0.198428	0.175676	0.284839	0.291223	0.262622	0.269915	0.282001	0.28396	0.299662	0.305269	0.309852	0.30452	0.311047	0.327915	0.326492	0.329693	0.324167	0.321996	0.309749	0.311286	0.30916	0.338871	0.320972	0.313029	0.316092	0.319659	0.322672	0.327605	0.325216
NP_17	0.507082	0.426586	0.520868	0.48925	0.497165	0.497877	0.49022	0.497268	0.509515	0.50241	0.506837	0.494095	0.509941	0.52537	0.535092	0.515167	0.50519	0.508049	0.509177	0.506463	0.512457	0.496863	0.503547	0.505204	0.502037	0.495557	0.497863	0.510588	0.510304
NP_18	0.353591	0.324345	0.414867	0.422468	0.425902	0.42537	0.401918	0.428754	0.435566	0.441895	0.443287	0.43978	0.447852	0.45334	0.455192	0.436761	0.436019	0.436448	0.444471	0.441203	0.447999	0.443626	0.448003	0.448143	0.453224	0.474202	0.484783	0.477742	0.47943
NP_19	-0.448518	-0.626485	-0.611517	-0.650193	-0.63547	-0.604531	-0.594707	-0.60291	-0.596632	-0.592019	-0.54558	-0.522281	-0.509954	-0.494072	-0.48175	-0.464444	-0.458194	-0.463115	-0.438787	-0.45846	-0.463759	-0.467007	-0.475211	-0.469376	-0.473125	-0.471672	-0.471373	-0.470846	-0.471194
NP_20	-0.469961	-0.577938	-0.661115	-0.666519	-0.699179	-0.614881	-0.647134	-0.622081	-0.62445	-0.652184	-0.660701	-0.674401	-0.666646	-0.670743	-0.647782	-0.669141	-0.655145	-0.675071	-0.691817	-0.686349	-0.70403	-0.708976	-0.711404	-0.714608	-0.712319	-0.710255	-0.710401	-0.709837	-0.709164
NP_21	-0.191694	-0.375061	-0.32039	-0.432893	-0.390884	-0.437028	-0.464712	-0.495848	-0.506288	-0.510765	-0.51079	-0.523918	-0.526404	-0.536197	-0.541415	-0.532766	-0.531433	-0.50985	-0.506764	-0.507728	-0.52701	-0.525791	-0.514647	-0.53575	-0.535831	-0.53584	-0.53353	-0.533842	-0.533883
NP_22	-0.479908	-0.537309	-0.573234	-0.578818	-0.618589	-0.529266	-0.602283	-0.561016	-0.570791	-0.552971	-0.56759	-0.583868	-0.597471	-0.599019	-0.622806	-0.626352	-0.649515	-0.632713	-0.619573	-0.621396	-0.609844	-0.605168	-0.606136	-0.604383	-0.608522	-0.610875	-0.612121	-0.611499	-0.611588
NP_23	-0.168018	-0.333648	-0.268606	-0.419855	-0.389683	-0.441995	-0.438811	-0.469842	-0.475047	-0.488882	-0.497575	-0.502946	-0.512861	-0.540011	-0.553969	-0.563773	-0.566231	-0.563063	-0.573801	-0.570733	-0.571118	-0.573379	-0.58576	-0.563511	-0.562317	-0.55814	-0.559587	-0.559067	-0.559699
NP_24	-0.35018	-0.580902	-0.595793	-0.647602	-0.655912	-0.664267	-0.640239	-0.668326	-0.668288	-0.681066	-0.660718	-0.659767	-0.655509	-0.651742	-0.646188	-0.645537	-0.644794	-0.660047	-0.663333	-0.64566	-0.614834	-0.607735	-0.595231	-0.600169	-0.596625	-0.600142	-0.60009	-0.602256	-0.602541
NP_25	-0.134509	-0.175936	-0.268961	-0.194264	-0.212206	-0.235707	-0.160922	-0.152667	-0.0824305	-0.113004	-0.13904	-0.170556	-0.144223	-0.151496	-0.168776	-0.158232	-0.148564	-0.143753	-0.131995	-0.135342	-0.133503	-0.13606	-0.13828	-0.138836	-0.141931	-0.141444	-0.140422	-0.141054	-0.141747
NP_26	-0.00156608	-0.0985506	-0.11669	-0.0187481	-0.0997381	-0.0866528	-0.0621923	-0.125382	-0.0960857	-0.0628934	-0.0633962	-0.0355408	-0.0631811	-0.0756676	-0.0814209	-0.10333	-0.0987432	-0.0960246	-0.107263	-0.114021	-0.114223	-0.117507	-0.115788	-0.120245	-0.133723	-0.132073	-0.12971	-0.129445	-0.129404
NP_27	0.324733	0.196215	0.152987	0.20025	0.169732	0.18835	0.177508	0.147039	0.168748	0.189413	0.186467	0.188785	0.182494	0.179146	0.172949	0.173235	0.166995	0.16419	0.167881	0.15783	0.152398	0.150455	0.152419	0.154568	0.182625	0.175781	0.17106	0.169904	0.1712
NP_28	-0.248894	-0.237857	-0.226217	-0.0739808	0.00863909	-0.0567673	-0.0898981	-0.0887681	-0.0829011	-0.110236	-0.10176	-0.116287	-0.159889	-0.125113	-0.138842	-0.138366	-0.145441	-0.160144	-0.16475	-0.167939	-0.172881	-0.173315	-0.170592	-0.167178	-0.168677	-0.169362	-0.168603	-0.168752	-0.167881
NP_29	-0.30771	-0.319605	-0.293357	-0.0904811	-0.0160602	-0.0588497	-0.0832914	-0.075632	-0.103724	-0.101737	-0.102526	-0.0740536	-0.0286964	-0.0555184	-0.0552016	-0.0675183	-0.0765917	-0.0705144	-0.0720687	-0.0692201	-0.0687562	-0.0653249	-0.0664125	-0.06657	-0.0650564	-0.0668523	-0.0680308	-0.0668307	-0.0668685
NP_30	-0.00527971	-0.133485	-0.216142	-0.228009	-0.19514	-0.226942	-0.260249	-0.2606	-0.255086	-0.204317	-0.247354	-0.244412	-0.23484	-0.212834	-0.189156	-0.156916	-0.159223	-0.159421	-0.175022	-0.173648	-0.168178	-0.176176	-0.179306	-0.178161	-0.181481	-0.177263	-0.179406	-0.179601	-0.179862

## Sheet: Table S3
Table S3. Loading values of 621 DEGs in PC1-29.
	PC1	PC2	PC3	PC4	PC5	PC6	PC7	PC8	PC9	PC10	PC11	PC12	PC13	PC14	PC15	PC16	PC17	PC18	PC19	PC20	PC21	PC22	PC23	PC24	PC25	PC26	PC27	PC28	PC29
Saa3	0.687186	-0.0860939	-0.141102	0.0569886	0.0281426	0.279402	-0.11921	-0.156847	-0.195868	-0.218028	0.134634	-0.0545045	0.0775809	-0.0689604	-0.110839	0.171875	-0.0990728	-0.020572	-0.0771136	-0.0409545	0.063591	-0.265037	-0.0483809	0.0164442	0.0347418	-0.217013	0.262013	0.0906642	-0.00192946
Saa1	0.736464	-0.129189	-0.175791	0.0737592	-0.0107391	0.297563	-0.121182	-0.185781	-0.152054	-0.17643	0.127134	-0.0327907	0.0454694	-0.0837936	-0.122237	0.15826	-0.108463	-0.0398617	-0.0346534	-0.0760536	0.0265491	-0.236191	-0.00394545	0.0187556	0.172788	-0.154929	0.0984935	0.0624115	-0.0389249
Saa1	0.769345	-0.184171	0.0662091	0.0118319	0.0566187	0.173494	-0.101784	-0.0732287	0.0118533	-0.178314	0.125266	-0.0764305	0.16339	0.0730679	0.0325708	-0.126394	-0.154442	-0.0258551	-0.0134395	-0.0999732	0.0686262	-0.310819	0.0942919	0.0138264	0.0355528	-0.106467	0.0243581	0.244354	0.00992754
Lcn2	0.80846	-0.281351	-0.15613	-0.0428515	-0.00676843	0.170677	-0.0106584	-0.241679	-0.0801679	-0.0419619	0.0762064	0.0211817	0.0245517	-0.0605476	-0.0911131	0.133163	-0.0532848	0.0156288	-0.0926618	-0.0720662	0.0228605	-0.139072	-0.025656	0.0272081	0.0996523	-0.20707	0.130883	-0.0212778	-0.00764278
Timp1	0.824617	-0.201153	-0.0634779	0.0240493	0.0104823	0.266729	-0.139295	-0.0991118	-0.136483	-0.109099	0.102407	-0.0341922	0.100705	-0.0222928	-0.0654607	-0.0157738	-0.13244	0.0215345	-0.0879608	-0.0563768	0.0501913	-0.193007	0.0283795	0.00767844	0.138954	-0.145556	0.0720943	0.0407511	-0.0137253
Cxcl5	0.693052	-0.249706	-0.363038	-0.118288	-0.0780278	0.164946	-0.0475534	-0.0469708	-0.21163	-0.0837686	0.0986724	0.03227	-0.0138737	-0.128082	-0.155175	0.279639	-0.0049225	-0.0928664	-0.067858	0.0378066	0.0202322	0.155676	-0.0445554	-0.0619607	0.0120202	0.161793	-0.0672087	0.0396473	0.121472
Orm2	0.856217	-0.0861682	0.0386843	0.0210443	0.117338	0.0904202	-0.079132	-0.0392522	-0.0298666	-0.212293	0.0601239	-0.0658307	0.128145	0.0381327	-0.0310105	-0.0606805	-0.153314	0.0359772	-0.0393672	-0.0519828	0.0371763	-0.243622	0.0495675	0.0188019	-0.101671	-0.106248	0.019717	0.179912	-0.0661456
Saa2	0.818952	-0.201727	-0.00821184	-0.0681337	-0.0184313	0.320059	-0.107881	-0.0738924	-0.00659967	-0.172214	0.10326	-0.0726587	0.123562	0.0147839	0.00500237	-0.0595028	-0.132448	-0.00486563	-0.0180055	-0.0934823	0.0572615	-0.22418	0.0315975	0.00658473	0.00553182	-0.113618	0.064082	0.0318901	0.00858075
Slc26a4	0.658469	-0.428023	-0.393899	0.0539716	0.0494136	-0.124596	-0.116404	-0.239579	-0.0364793	0.11443	0.0829799	0.0414726	0.0534222	-0.0056934	-0.0508355	0.242297	-0.00297825	0.039198	-0.111836	0.0143066	0.0415574	0.0088914	-0.0750273	0.030773	0.119519	-0.0724426	0.064669	-0.0394499	0.0333482
Ly6f	0.777028	-0.340548	-0.197665	-0.279369	-0.0731737	-0.0562563	-0.0242914	-0.157836	-0.0921891	0.0529746	-0.0207236	-0.0175627	0.021039	-0.116932	0.095273	0.178866	-0.0319807	-0.106627	-0.0704028	0.0351381	0.0203625	-0.186249	0.00919455	0.00424309	0.0209259	-0.052944	0.0549456	0.0382227	0.019401
Timp1	0.814031	-0.137266	-0.121359	0.0240097	0.122929	0.285274	-0.244306	-0.0271665	-0.161441	-0.156021	0.132985	0.0641983	-0.0128299	-0.0591547	-0.0424614	0.0319378	-0.149338	0.00481721	-0.0272724	-0.0883294	-0.078433	-0.142572	-0.0245981	0.0234236	-0.0154016	-0.0207259	0.00808951	0.0831846	-0.0379108
Orm1	0.860099	0.0200301	-0.144166	0.0861243	0.209523	0.0226593	-0.0561979	-0.00207986	-0.0598671	-0.225287	0.0352183	-0.107359	0.114315	0.0099453	0.0213105	-0.00243689	-0.183148	-0.0088055	0.0205883	-0.0232173	0.0587734	-0.115217	-0.0304132	0.117942	-0.0208192	0.003329	-0.0631206	0.158651	-0.0870253
Cxcl10	0.622572	-0.509276	-0.0686204	-0.316521	-0.295241	-0.12593	-0.0646471	0.0982674	-0.0909322	-0.01221	0.0471212	-0.136123	0.0716738	-0.0187602	0.0588204	-0.079388	0.029029	0.0278592	0.0787338	-0.0727418	0.0333962	-0.149964	0.128461	-0.0142228	0.0100637	-0.0243309	-0.0266624	0.164638	-0.0702786
Ccl7	0.801642	-0.124707	-0.111478	-0.355649	-0.128191	0.0310022	-0.321539	-0.0688666	-0.149645	-0.0609952	-0.0117236	-0.0299508	0.0732345	-0.0218965	-0.0341448	-0.0415418	-0.0309197	-0.020825	-0.0849069	0.0490589	0.0579422	-0.0758379	0.102145	-0.00078968	-0.0175803	0.0493259	0.00842841	0.0893315	-0.0124676
Noxo1	0.760514	-0.513679	-0.177146	-0.118238	0.0103698	0.188842	-0.0419415	-0.0628846	-0.072714	0.0270774	0.0281864	0.052094	0.137736	-0.0659677	-0.06718	0.0504472	-0.0648766	0.0397293	-0.0799389	0.00328242	0.0197696	-0.0531421	-0.0120029	0.0166153	0.051257	-0.0893552	0.0144971	0.0422251	0.0507096
Timp1	0.84981	-0.102426	-0.0583882	0.0267055	0.121677	0.224671	-0.262188	0.0177112	-0.113252	-0.13005	0.0156254	0.035262	-0.0374605	-0.0589502	-0.0321636	-0.0952937	-0.188034	0.0283961	-0.11119	-0.0269132	-0.0751509	-0.132002	-0.000306739	-0.015372	0.0130708	-0.0457724	-0.0107045	0.0859269	0.0180749
Ccl24	0.566107	0.293634	-0.175661	0.0994008	0.252999	0.446279	-0.140214	0.079113	0.179579	-0.156813	0.251827	-0.328207	0.0472745	0.0377888	-0.0438578	-0.0180569	0.0123892	0.0955115	-0.0922369	-0.0205848	0.0295548	0.0341724	0.0364301	0.0654471	0.0378168	0.0355016	0.0248723	-0.0193168	0.0065809
Dbp	-0.138321	-0.256025	0.755859	-0.30779	0.385209	-0.203727	-0.0551327	0.0119156	0.0263234	-0.0597507	-0.0114709	0.0338352	0.0186772	0.0683968	0.12538	0.00341572	-0.0417383	0.0924714	-0.0451643	-0.0822079	0.0634082	-0.0593655	-0.0458211	0.00276079	-0.00710218	-0.00198177	-0.00206723	0.0262942	-0.0199174
Hspa1a	0.382676	0.769667	-0.142723	-0.279362	0.0644086	-0.051003	-0.0675664	-0.043773	-0.0131193	-0.0784741	0.00568309	0.0431262	-0.00689303	-0.0278785	0.143632	-0.0572095	-0.0286292	-0.0592423	0.142273	0.0375664	0.071152	-0.0993815	-0.0699352	-0.101021	-0.132644	-0.189702	-0.0739193	0.0317324	0.0225318
Pigr	0.742706	-0.0544464	-0.36771	-0.30829	-0.104131	0.234506	-0.116667	-0.129242	0.0465495	0.0158033	-0.186655	0.0113291	0.00192348	-0.0246624	-0.101854	0.0560551	0.0177228	0.0118341	-0.100146	0.134825	0.0455463	-0.014473	0.00270692	-0.0288971	0.0953491	-0.115663	0.0818173	-0.0765763	0.0262766
Irg1	0.767964	-0.298184	-0.320108	-0.120654	-0.121962	-0.256753	-0.112965	0.0791331	-0.0678615	-0.0537038	-0.0694419	-0.0322568	-0.075872	0.0577865	-0.0572899	-0.040021	0.115642	-0.177708	-0.0710849	0.0668631	-0.0677578	-0.0278886	0.0583965	-0.0286631	-0.046081	-0.024249	0.00391954	-0.0052652	-0.101525
Irg1	0.765246	-0.175117	-0.249841	-0.152549	-0.141005	-0.115912	-0.0802141	0.167115	-0.0944241	-0.00883628	-0.155942	-0.147544	-0.257792	-0.0614135	0.00813556	0.0268434	-0.0965864	-0.195534	0.00546251	0.103461	-0.0139005	-0.0630861	0.0777617	-0.0723338	-0.0600248	0.0108702	-0.0463374	-0.0479588	-0.149496
Ccl4	0.609215	-0.640912	-0.0591133	0.00868899	-0.128166	-0.0312618	-0.268452	-0.0209676	-0.0390459	-0.189214	-0.0911292	0.0500243	0.140499	0.115793	-0.0815015	-0.100463	-0.0697286	-0.0633534	0.059684	-0.0705356	-0.00882426	-0.05124	0.0175379	0.0313296	-0.0125234	-0.0281918	-0.0372805	0.0532762	-0.00265834
Spon2	0.294402	0.294193	-0.444754	0.57729	-0.340586	0.0731872	0.17369	-0.0376849	-0.108835	0.0630362	0.174477	0.0392461	0.142974	-0.0272754	-0.0979272	0.117089	0.0404653	0.0867644	0.00857339	0.151774	-0.0673887	-0.0539961	0.0742365	0.0228889	0.0558318	-0.000622415	-0.026668	-0.0198629	-0.0221235
Hspa1a	0.4103	0.759137	-0.140796	-0.265939	0.0736211	-0.0604615	-0.0389482	-0.0589689	-0.0139465	-0.0777932	0.00523619	0.0456112	0.002494	-0.0241143	0.137902	-0.068369	-0.0363878	-0.0616958	0.130022	0.0366076	0.0769527	-0.100105	-0.0684075	-0.0971414	-0.139648	-0.194323	-0.0808536	0.0227137	0.0190428
Spon2	0.20513	0.211305	-0.486228	0.581009	-0.383019	0.157294	0.139065	-0.00569505	-0.115358	0.0331733	0.165361	0.00273052	0.160081	-0.0176002	-0.0309354	0.0457784	0.0808893	0.0191127	-0.053883	0.170923	-0.141397	-0.0748099	0.0606444	0.00217916	0.0834793	0.00965814	-0.027824	-0.0252056	-0.0307797
Ccl7	0.756906	-0.0939852	-0.126571	-0.411624	-0.170953	0.0304407	-0.35835	-0.0465267	-0.148647	-0.047413	-0.0321196	0.00584882	0.0335127	-0.0425698	-0.0550248	-0.0757483	0.0191542	-0.0173575	-0.0733199	0.0838495	0.0578225	-0.0207404	0.104716	-0.010867	-0.0198339	0.0681123	0.00930194	0.0407095	-0.0159746
Ccl2	0.764092	-0.174405	-0.23294	-0.361705	-0.192421	0.0124903	-0.277974	-0.107036	-0.0032015	-0.0719119	-0.116608	-0.079222	0.0914773	-0.0564613	-0.105721	-0.0102034	0.0483073	0.00962754	-0.0425759	0.0974765	0.0533581	-0.0367779	0.0623709	-0.00800396	0.0318401	0.015712	0.00240253	0.0603507	-0.00720907
Hpxn	0.629671	-0.325522	0.0835961	-0.246295	-0.0826052	0.371641	0.0299506	0.155881	-0.224503	-0.0998078	0.181532	0.0167021	-0.0369564	0.041437	0.11587	0.00980562	-0.0702536	0.124463	-0.265915	-0.167723	0.107936	-0.0619445	0.00483679	-0.0130651	-0.0285283	0.0394297	0.0730483	0.0587044	-0.0588466
Ccl17	0.645266	-0.110744	-0.198974	0.0920716	0.153683	0.385277	-0.196553	-0.273144	0.151359	-0.21346	0.19263	0.139323	0.0412616	0.0402823	-0.125073	0.0114005	-0.0010803	0.209248	-0.0849098	0.137704	0.0195505	-0.117451	-0.0740339	0.0294239	0.0308847	-0.0240712	0.00267144	-0.0385211	0.0201597
Gpr109a	0.559648	-0.46276	-0.0654714	-0.413994	0.117651	0.211283	-0.111222	0.0768578	0.224603	-0.227192	0.0525028	-0.0666844	-0.141421	0.0940665	0.017391	-0.0819024	-0.136595	-0.0835883	0.0488164	-0.00813894	0.0556638	-0.0569779	0.0173761	0.0299382	-0.140663	-0.0163988	0.0358684	0.123006	-0.0545587
S100a8	0.454345	0.0602814	-0.231656	0.503171	-0.325898	-0.0386531	0.246558	-0.36354	0.0429277	0.0152716	-0.164947	-0.0152298	-0.164927	0.238622	-0.0102049	0.0635608	0.0693927	0.0650448	-0.0392323	0.0104976	-0.0604476	-0.0415933	-0.0220771	0.0265837	-0.0322913	-0.00057679	-0.00696922	0.19529	-0.0901737
Il1r2	0.829231	0.236639	0.0297486	0.156308	-0.0819519	0.0485329	0.216019	-0.0909866	-0.0422565	-0.0541029	-0.194471	0.00407229	-0.0624925	0.224952	-0.0157574	0.0375338	-0.0949139	-0.113897	0.0291047	-0.0841545	0.00527268	-0.1521	0.0655711	-0.0250988	-0.0163412	-0.00785043	-0.00885159	0.0921454	-0.0378479
Spp1	0.236397	-0.415717	-0.405149	-0.551869	-0.15842	-0.0865338	0.0709184	-0.179438	-0.198428	0.141959	-0.223912	-0.0836177	0.0651857	0.00717241	-0.105142	-0.179797	0.004	-0.148616	0.123806	0.00443936	-0.0844625	0.0507899	-0.113937	0.0498063	-0.0665402	0.0365985	0.00530843	-0.00258506	0.00361916
Isg15	0.60943	-0.467213	-0.00997917	-0.0871901	-0.268593	-0.329737	0.0550197	0.0410059	-0.162556	-0.0718019	-0.234418	-0.0260651	0.202303	-0.107527	0.110572	-0.0955914	0.0375907	-0.060397	-0.0902038	0.0585899	0.0117984	-0.100795	0.0960336	-0.0671084	0.016122	-0.0100978	0.00410506	0.115002	0.0412853
Fabp1	-0.710987	-0.122594	0.308549	0.104902	-0.144451	0.23617	0.250835	0.0813566	0.0932764	0.0257864	0.0920202	0.0386804	-0.269876	0.113488	-0.00943567	-0.0563365	-0.0567285	-0.129192	-0.13077	0.0298806	-0.00790842	0.170992	-0.0699429	-0.0935089	-0.0539201	-0.0772733	-0.0992095	0.10603	0.0892985
Vnn3	0.874485	-0.00180389	-0.037722	-0.306134	0.00630748	0.00862564	0.10434	-0.212331	0.099034	-0.0357337	-0.0907019	0.0451475	0.0811344	0.0319164	-0.0755965	-0.00227829	0.00681938	0.0743687	-0.0753501	0.069557	0.108527	-0.0396376	0.123918	-0.0483644	0.0126449	-0.0341892	0.000796572	0.0241334	-0.0180442
Ear1	-0.783089	-0.186242	0.0802289	-0.251784	-0.174139	0.124073	-0.00746119	-0.225214	0.0801217	0.0168226	0.166865	-0.000657808	-0.0966569	-0.0387495	-0.130725	-0.285008	0.093102	0.0330318	0.0730481	0.0185416	-0.08095	0.081498	0.0920636	0.0270794	-0.0430141	0.012175	-0.045859	0.00920702	0.00436534
Ccl8	0.623077	-0.164442	-0.342403	-0.327097	0.0163851	-0.108849	-0.135751	0.213971	0.320318	-0.0653767	-0.0314551	-0.16214	-0.201387	-0.0482515	0.0016794	-0.146363	-0.0346782	0.0335803	-0.135697	0.068063	0.129616	-0.0434632	0.0623403	-0.0885764	0.104084	-0.0341262	0.0993442	0.0868906	0.0221696
Cp	0.642286	-0.181717	-0.181456	-0.216494	-0.117781	0.25275	-0.464587	-0.216247	-0.0415845	-0.0714028	0.0789656	0.0900791	-0.135791	0.203859	-0.0428961	0.0436593	0.0656895	-0.0601467	-0.0691562	-0.0635152	0.0176081	-0.016368	0.0458447	0.0875675	0.101916	-0.0623899	0.0820995	0.00974882	0.0340435
Ch25h	0.872934	-0.110189	0.150335	-0.0705157	0.0757455	-0.239601	0.158609	-0.201674	-0.0191366	0.0502191	0.0874474	0.117952	0.0345733	-0.0335769	-0.053292	0.0871257	0.0265178	0.00363908	-0.0308933	-0.0219684	0.0385235	-0.00171572	0.0355582	0.112346	0.0900034	-0.00949488	0.074411	-0.000116347	-0.0290069
Il1b	0.814405	0.297108	-0.0954041	0.246245	-0.197356	0.0096716	0.221678	-0.0238274	0.0741017	0.085591	-0.0475538	0.0370343	-0.164995	0.140265	-0.019622	0.0738608	0.0438078	-0.0658028	0.00405875	-0.0108199	-0.00322996	-0.0756388	0.0234638	0.0233785	-0.0106338	0.00967629	-0.0350345	0.0597261	-0.0507955
Gpnmb	0.256617	-0.608977	-0.108553	-0.319818	0.12274	-0.22907	-0.120559	0.116441	-0.337471	0.12392	-0.177633	0.234569	-0.11963	0.0344278	-0.085516	-0.181885	-0.0828049	-0.176772	0.0682907	0.0877043	-0.0857563	0.0942085	-0.085468	0.0013978	-0.0816172	-0.0197961	0.0185536	0.00186952	0.0220725
Ccl12	0.760342	-0.089776	0.00290771	-0.437143	-0.16309	-0.212121	-0.070915	-0.191567	0.118037	-0.0958335	-0.0713302	0.00917746	0.120684	-0.0225423	-0.0603436	-0.0277772	0.102998	0.0652005	-0.0687611	0.0294288	0.126481	0.0162072	0.1393	0.0120812	0.00510602	0.0521898	0.04073	0.0122398	0.0282702
Il1rn	0.598842	-0.556406	0.132782	-0.284502	-0.161961	-0.00160383	0.332054	-0.0156735	-0.134712	-0.0693518	-0.0670408	-0.0436773	0.056822	0.0380975	0.136675	-0.0543342	0.028929	-0.0844039	0.0154641	-0.0298164	-0.0322214	-0.142726	-0.01429	-0.0641211	-0.0229926	0.0518733	0.0120944	0.0508949	-0.00686925
Fgg	0.363906	-0.0827737	0.304064	-0.210541	-0.0362163	0.370748	0.294898	0.205695	-0.264378	-0.323681	0.136242	0.0569063	-0.00688888	0.131006	0.150024	0.0699612	0.0182965	0.045345	-0.157514	-0.0102678	-0.0894676	0.144398	-0.316528	0.0885348	-0.0728838	0.202613	0.0228786	0.0611726	-0.00058587
Irf7	0.340903	-0.492348	-0.310693	-0.43787	-0.0285008	-0.345513	-0.226899	0.311483	-0.0281122	-0.0710572	-0.0491663	-0.13045	-0.0119358	0.157769	-0.034358	0.0710971	0.0765902	-0.0696078	0.0848744	0.0250897	-0.0338447	0.0689444	0.0207695	0.0515716	-0.00172947	-0.0161724	-0.00820185	0.00106816	0.00344247
2300003P22Rik	0.699294	0.323438	0.0302005	0.196214	-0.0950735	0.0387903	0.30841	-0.0553873	-0.0502274	-0.0319626	-0.258998	0.0473747	-0.132681	0.243193	-0.0320142	0.0729361	-0.0771035	-0.185326	0.0405183	-0.0540144	-0.00796914	-0.0978081	0.0156478	-0.0839671	-0.0584035	0.0680051	-0.070533	0.0386404	-0.161232
C3	0.735854	-0.368958	-0.312922	0.0520208	0.315706	-0.143386	0.0959697	-0.140283	-0.0564609	-0.0544503	0.182782	0.00552149	0.0722751	0.0402976	-0.0119181	0.0161747	-0.0760058	0.0785747	-0.00225454	-0.0565774	0.0602375	-0.0218116	-0.0239636	0.0017489	-0.0269505	-0.0022665	0.0666184	-0.0203502	0.0194219
Serpina3n	0.849006	0.135677	-0.258093	-0.172482	0.0437061	0.0275111	0.0794981	-0.321723	0.0226788	-0.0161094	-0.0617282	-0.0557902	0.0310365	-0.0581375	-0.0439829	0.00237049	-0.0421485	0.149314	-0.0328074	-0.0501423	-0.0612528	-0.0313591	-0.0372618	-0.000284957	0.0268606	0.0402946	0.0340369	0.0251967	-0.00461531
Tnfrsf9	0.891312	-0.142834	-0.084888	0.012114	0.222803	-0.157685	-0.00911632	-0.07575	0.0773676	-0.135473	-0.0246726	0.116651	-0.027827	-0.092296	-0.0638896	0.0154306	-0.091748	0.00197188	-0.0961395	0.086693	0.0774131	0.0372616	0.0450546	-0.0711899	-0.0151929	-0.0474636	0.035607	-0.0253763	-0.0354885
Trem2	-0.103605	-0.528746	-0.244205	-0.252885	0.158686	-0.463667	-0.325262	0.241654	-0.0229443	0.00596382	-0.0943501	0.0198904	0.025114	-0.0239266	-0.0500553	-0.00663343	0.111828	0.00222246	0.100716	0.0605142	0.0634203	-0.247469	-0.0286881	0.03767	0.168247	0.0113303	0.0733044	0.0395302	-0.197337
Hspa1a	0.555369	0.712973	-0.0333688	-0.238732	0.0662209	0.0164282	0.0241444	0.131378	-0.0230449	-0.0605823	-0.0221785	0.146536	0.00471301	0.000526582	0.0746797	-0.0593213	0.0464248	-0.0374539	0.134223	0.0583192	0.031079	-0.0622202	0.127503	0.014622	-0.12251	-0.0491597	-0.00579365	-0.0499866	0.0332316
Cyp7b1	0.567445	-0.620195	0.00411981	-0.0748605	-0.287444	0.0192604	-0.110472	0.098958	-0.0971013	-0.0350975	0.117733	-0.0473903	0.231294	-0.160831	0.0426882	0.0080324	0.0515792	0.200876	-0.0125395	-0.0100214	0.0548865	-0.0648453	0.00992948	0.0385259	0.0342818	-0.05631	-0.101939	0.0890291	0.000149199
Oas1f	0.186392	-0.576026	-0.344615	-0.0538463	-0.182056	-0.46398	-0.166652	0.259289	-0.114691	0.112888	-0.070978	-0.0174085	-0.00449951	-0.0565892	0.0567562	0.0651664	0.0775514	-0.0126117	0.060581	-0.00977794	0.00875993	-0.239186	0.135945	0.113182	-0.0588289	-0.0776622	-0.0757646	-0.0881767	0.0701038
Mt2	0.637595	-0.292441	-0.0821327	-0.262772	0.0757287	0.512074	0.0210738	-0.0566615	0.175928	-0.152789	0.0473591	0.065794	-0.052807	-0.0459726	0.0607845	0.0739573	-0.0362629	0.150175	0.0515292	0.144308	0.0250223	-0.112037	-0.123952	-0.055196	-0.0104255	0.0517884	0.0155243	-0.0556957	-0.0232808
D17H6S56E-5	0.839311	0.190927	-0.192595	-0.147209	0.124047	-0.104289	0.0234772	-0.135813	0.111121	-0.0335769	-0.134734	0.0457445	-0.148191	0.0676501	-0.193349	0.0932695	0.0681829	0.0647914	-0.0697059	-0.0121813	-0.127399	-0.0269618	0.000939429	0.0153384	-0.00859808	0.0301962	0.0981673	0.011263	0.0833228
Sult1d1	-0.520349	0.127525	-0.411378	-0.645358	-0.00934947	0.112657	-0.0628473	0.00618205	0.181047	0.00380407	-0.0917763	-0.159687	0.0433076	-0.0149988	0.0538172	0.123912	-0.0940111	-0.00308928	-0.015018	-0.0621587	0.0476805	0.0165503	-0.000526065	-0.0305055	-0.00283039	-0.0325663	-0.0138255	0.0609716	-0.0450564
Cd14	0.639154	-0.337935	-0.368179	-0.390897	-0.0783067	0.294603	-0.0570204	0.0215843	0.169759	-0.0210237	-0.0434145	0.0797868	-0.0834654	-0.12593	0.0449618	0.0936783	0.00321396	-0.0124281	0.0573567	0.031513	0.0495241	0.049036	-0.0607367	-0.0544451	0.0058239	0.010501	-0.0278969	0.0442112	0.0481413
Il4i1	0.67387	-0.529874	-0.277661	-0.202626	-0.00511486	0.108993	0.0370285	0.156948	0.0895708	-0.113322	0.0783381	-0.00945502	-0.142534	0.158425	-0.132687	0.001921	0.0255542	0.0113294	-0.0712479	0.0103037	-0.0453191	0.0322965	-0.0146297	-0.0336812	-0.0647426	0.0445253	-0.0256864	0.0379137	-0.0165606
Ear10	-0.659852	-0.233268	0.0585519	-0.186582	-0.191366	0.186273	-0.0217786	0.094119	0.277014	0.0703567	0.270279	0.172677	-0.206649	-0.158621	-0.115839	-0.195966	0.156409	-0.00494606	-0.0716152	0.0886097	0.0660696	-0.00479955	0.0531989	0.161251	-0.0500303	-0.0205216	-0.109352	0.0356211	-0.0144478
Cxcl1	0.523846	-0.558577	-0.147753	-0.0809239	-0.000116533	-0.0283044	-0.442363	0.147937	-0.173103	-0.0184485	0.175053	0.1998	-0.0557707	0.0447311	-0.0507787	-0.102939	0.047396	0.0476007	-0.0803425	-0.0164892	-0.0168719	0.108251	0.0133671	0.0383877	0.0314447	0.126762	0.0587878	-0.0330968	0.034179
Mbd1	0.744111	0.426762	0.181329	0.0191503	-0.093659	-0.112008	0.237077	0.00182838	0.0473584	0.11901	-0.134115	0.133035	0.153363	-0.0786188	0.0226588	-0.0208834	-0.00417624	0.0804392	-0.0799427	0.0586479	0.0246579	-0.0397334	-0.15985	0.131231	-0.00948516	-0.0565598	-0.0770569	-0.00847873	0.00892436
Oas1a	0.379105	-0.343898	-0.267039	-0.368335	-0.245564	-0.27842	-0.106401	0.344174	-0.144616	0.0135607	-0.195374	-0.23354	0.0345088	-0.105878	0.0653718	0.0610349	0.0836579	0.0597399	0.0235989	0.147141	0.0860448	-0.179494	0.17225	0.0538577	0.0763031	-0.0624728	-0.0669607	-0.0861546	0.0512805
Arntl	0.0724085	0.194707	-0.768446	0.186187	-0.423666	0.194165	0.0374361	0.0187359	-0.0596772	0.0280385	0.0758309	-0.000484529	-0.021557	-0.0869128	-0.224726	0.0372902	0.060015	-0.0303149	0.0205786	0.0620066	-0.13693	0.0902797	0.0640375	0.0262665	0.0191088	0.00421895	0.0158724	-0.0396976	-0.00507216
Clec4d	0.829522	0.242759	-0.0950735	0.200962	-0.0662369	-0.109545	0.210001	0.145996	0.118849	0.0311147	-0.0952063	0.0049485	-0.215004	0.0774729	0.0885054	0.0798082	-0.0582766	-0.0849732	-0.0431526	-0.0493983	-0.00490681	-0.0825239	-0.0125953	-0.0423354	-0.0665002	-0.000115138	-0.0128995	-0.00206955	-0.0531426
Slpi	0.548237	-0.39181	-0.200431	0.0604474	0.449187	-0.116541	0.0258855	-0.198195	-0.115248	0.30414	0.175389	0.0847943	-0.0947341	-0.0263612	0.0304933	-0.055542	0.000294893	-0.0397001	-0.0235406	-0.108898	0.0608074	-0.228025	0.0982784	-0.00273927	0.0114173	-0.0120831	-0.0339306	-0.0805893	0.0458616
Ear11	-0.799533	-0.200217	0.136171	-0.0307184	-0.19583	0.00500323	0.110575	-0.21684	0.0994423	-0.107308	0.153071	-0.223431	-0.135904	0.00748177	-0.165867	-0.167874	0.109993	-0.000656664	0.0463781	-0.0295454	-0.0776109	-0.0213165	0.0567216	0.01999	-0.0954152	0.0131201	0.00686035	-0.00492084	0.00361004
D17H6S56E-5	0.845148	0.162725	-0.190151	-0.268213	0.0154739	-0.00606055	0.071029	-0.141238	0.116449	0.05291	-0.150479	0.090368	0.00370342	-0.0526681	-0.127709	0.0722718	0.0811371	0.148533	-0.0475392	0.000778465	-0.10394	-0.0255175	-0.00689774	-0.00783482	0.0189008	0.0433209	0.0913081	0.0275455	0.024293
Vnn1	0.670289	-0.455254	0.0817151	-0.0558158	0.0841143	-0.281493	0.0955901	-0.0829035	-0.262979	0.161697	0.214054	0.173117	-0.128014	-6.64701e-05	0.0238208	0.0735332	-0.0580855	0.0259871	-0.136028	-0.0100109	0.0231587	-0.0440378	0.00431604	-0.00971919	0.0705383	-0.00865559	-0.0375232	-0.0675002	0.040359
Lgi2	0.647315	-0.435021	0.36295	0.225652	0.188752	-0.0443697	0.203079	-0.152427	-0.0692295	-0.0117885	-0.131036	-0.11185	0.00300137	-0.00840927	-0.116296	0.0456005	-0.0172811	0.00547144	-0.0731477	0.16718	0.0914099	-0.0897371	0.00823373	-0.0571786	-0.0278238	-0.0264865	-0.0391755	-0.0120188	0.0138766
Fmo3	-0.70057	0.134716	-0.267853	-0.588306	0.0965567	-0.029553	-0.107478	-0.00475445	0.056234	0.0944924	-0.0451901	0.0451441	-0.0298923	0.0216084	0.107823	0.0370224	-0.0772225	0.0132595	-0.0694594	-0.00966078	0.0336647	0.0452366	0.0177879	-0.00670802	0.0165445	0.0155204	0.014493	-0.0603187	-0.0440999
Tsc22d3	0.295102	0.510948	0.336219	-0.48556	0.130785	-0.261661	0.055783	0.082673	-0.0529107	0.199781	-0.172243	0.00659614	-0.0368871	0.0298979	0.201427	-0.00669182	0.0134613	0.130499	-0.0265922	0.0738316	-0.0966696	0.0235603	-0.031484	0.0763219	-0.0542971	-0.0943712	0.190775	-0.0470952	-0.040853
Clec4n	0.621699	-0.502201	0.116159	-0.280071	-0.178049	-0.136834	0.400132	-0.09009	-0.058113	0.0473736	-0.0432414	0.0644436	-0.0255591	0.0242223	0.0215091	0.0412537	-0.0274847	-0.0026489	0.110526	-0.0730835	0.0572687	-0.105723	0.0149549	-0.0192441	0.0192166	0.0168224	-0.0203673	0.0341373	0.00733433
Ccl9	0.66666	-0.459673	-0.289456	-0.258778	0.159567	-0.0863418	0.176695	0.0700751	0.149033	-0.0591844	0.115088	-0.0132455	-0.111385	0.10221	0.00966195	-0.0237283	0.113533	-0.0704587	-0.163313	-0.00734015	-0.0755086	-0.0782416	-0.0197659	-0.0200436	0.0096349	0.0438167	0.00334996	0.00933224	-0.0501611
Bcan	-0.747596	0.0351045	0.104234	0.178453	-0.315615	0.244368	-0.0230281	0.236505	-0.0536865	0.112864	-0.0615737	-0.265562	-0.130357	-0.0728422	0.178994	-0.134978	-0.0270206	0.0338747	0.000678758	0.0508161	-0.0683012	-0.0316353	0.0117228	-0.00856856	0.0636458	-0.056892	0.00393587	0.0344988	0.00654926
Cfb	0.609738	-0.543261	-0.192752	-0.0781119	0.288426	-0.21255	0.100302	0.0700393	0.068815	-0.104797	0.0930476	0.137054	0.0964533	0.0843032	0.0519081	-0.156142	0.0855415	-0.0601828	-0.148824	-0.0201338	-0.0876453	-0.0959311	0.0114251	-0.0676707	0.0288587	-0.0334698	0.00799118	-0.00467472	0.0522376
Per2	0.0961656	0.0949689	0.702485	-0.496932	0.286166	-0.016436	0.00108024	-0.116406	0.157227	-0.0525833	-0.0688043	0.069795	0.0824184	0.100303	0.0141045	-0.157829	0.0616718	0.120306	0.0685638	-0.154261	-0.0211834	-0.0415519	-0.111048	0.00680162	-0.042209	-0.0130571	0.00609349	0.0408384	0.0394549
Ear3	-0.718472	-0.190185	-0.0470098	-0.282138	-0.111001	0.103798	-0.0974936	-0.250206	0.178511	0.147682	0.299298	-0.0318764	-0.0542551	-0.0766511	-0.0965067	-0.219721	0.133077	0.105067	-0.0755878	0.0496758	-0.0553755	-0.0047136	0.0896963	0.0458596	-0.0588922	0.0290588	-0.0597343	0.0402874	-0.0161655
Dll1	0.17662	0.280085	0.62887	-0.346705	-0.269247	-0.157377	-0.253753	0.124821	0.126271	0.21315	0.034019	-0.202751	0.0777666	-0.00862429	-0.134621	-0.148792	-0.0799867	0.0349946	0.0519996	-0.0306975	-0.0109522	0.00185354	-0.0301352	-0.0277894	0.146077	-0.0934546	0.0105455	0.00325926	0.06443
Retnla	0.44635	0.210959	-0.102108	0.16711	-0.450357	0.400039	-0.171381	-0.0152802	0.249874	0.0684481	0.0125727	-0.0372885	0.0334951	0.132764	0.167773	0.192644	0.185232	0.219801	0.0369736	-0.0244956	-0.0413684	-0.100823	-0.215386	0.114366	0.0667583	-0.0779091	0.0530557	-0.0586251	0.00798744
Cpxm1	0.625224	-0.135719	0.163106	0.42648	0.121434	-0.173088	-0.117028	-0.202599	0.156788	0.0431528	0.0452874	-0.296942	0.0400656	-0.0261622	0.242241	0.0550126	-0.00536396	0.0771958	0.0343253	0.175779	0.121	0.0212039	0.136415	-0.145445	-0.0744482	-0.050326	0.0230909	-0.0041198	-0.0229915
Cidec	-0.717578	0.223958	-0.231566	0.288823	0.144902	-0.0302419	-0.100502	0.198221	0.199318	-0.0913786	-0.039016	-0.23895	0.146062	0.0596417	-0.188264	-0.0478837	0.120136	0.0924783	-0.0879539	0.0537567	-0.0294322	0.0338924	0.00987061	0.0767588	-0.026282	-0.0799092	-0.0391562	0.080536	0.0233348
Cd177	0.811167	-0.173744	-0.265757	-0.205587	-0.003817	-0.0200286	0.126906	-0.0448706	-0.0779215	0.126467	0.0918845	0.0503325	-0.0702158	0.0309901	0.108474	-0.169762	-0.128614	-0.0042703	-0.140342	0.0361385	0.196033	0.0250307	-0.0348851	0.108603	0.0649378	-0.0017912	-0.0732177	0.0223076	-0.0341795
E030010A14Rik	0.595179	0.36725	0.50547	0.376231	0.0841337	0.114783	0.040057	-0.0415808	-0.0105764	0.120826	0.130167	0.0198209	-0.0612931	0.0684138	-0.0226554	-0.140686	0.0295357	-0.010251	-0.0185633	0.124914	-0.0102158	-0.0500654	0.0114253	0.0137653	0.0455198	-0.0564185	-0.0200161	0.023468	0.0582994
Tsc22d3	0.398271	0.479481	0.366447	-0.442744	0.216085	-0.142981	0.0221701	0.0139701	-0.0846999	0.237012	-0.122685	-0.110768	-0.0192937	-0.0916849	0.0950595	0.0937506	0.105279	0.0235629	-0.0295102	0.0891418	-0.0637287	0.0372407	-0.0522634	0.0498062	-0.117767	-0.0479946	0.161315	0.0281461	0.148229
Uhrf1	0.593309	-0.386581	0.102666	0.05582	-0.240606	0.204594	-0.253448	-0.0419195	0.237527	-0.193816	0.1344	-0.140932	-0.253267	0.0575898	0.144651	0.198331	0.0294433	0.145006	0.0339532	0.116431	0.012205	-0.0921255	-0.0416609	0.0705236	0.0642121	0.0242201	0.0483008	-0.00733293	0.0216039
Mefv	0.595374	-0.275814	-0.135072	0.409632	-0.0376673	0.0474412	0.331496	0.248306	-0.0147317	-0.0375022	0.197362	0.0861477	0.0521392	0.219331	0.193178	-0.0250513	0.0568074	-0.175232	-0.0880724	-0.0319281	0.0286286	-0.0845244	0.0656376	0.00551797	0.00165484	-0.0728573	-0.0860219	0.0314043	-0.0521854
Akp2	0.75506	-0.186955	-0.281704	0.106624	0.0818503	-0.327887	-0.175949	-0.25698	0.115267	-0.0995088	-0.00876535	-0.0137301	-0.0117541	-0.118155	0.0702371	-0.0167626	-0.083692	0.0610687	-0.0453	0.0163453	0.0836626	0.12051	0.0459305	0.0106057	0.0420011	-0.060798	0.044814	-0.0659632	-0.0402075
Hsp110	0.51831	0.624164	-0.413163	-0.116997	0.000816062	0.00219577	0.0773802	-0.00461789	0.108037	0.0462868	-0.191209	-0.0646654	0.0630033	0.0244131	0.130979	0.0507174	-0.0190739	-0.00167388	0.0600036	-0.0173849	-0.00143466	-0.0773941	0.0482487	0.0264245	0.010148	-0.190452	-0.146571	0.0134426	0.0345225
Oasl1	0.197503	-0.523466	-0.61207	-0.210585	-0.0942937	-0.238981	-0.188752	0.0430204	-0.0127252	-0.00237841	0.018395	-0.112533	-0.176779	0.0200174	0.0169293	-0.0689269	0.0799607	-0.0109083	0.164881	-0.0352995	0.0218391	-0.134406	0.163337	0.0866714	-0.034426	0.0765262	0.104289	0.0943922	-0.0124568
Mmp3	0.520797	-0.177322	-0.0663761	0.438844	-0.197815	0.213849	-0.205913	0.0379891	-0.206536	-0.119647	0.269409	-0.172242	-0.0646991	0.0886454	0.13664	-0.310404	-0.110689	0.116329	-0.0379171	0.151818	0.158051	0.0359931	0.0224434	0.00988349	0.079306	-0.0401333	0.0100439	-0.0123748	-0.00661839
BC020489	-0.262603	-0.410187	-0.347554	-0.185197	0.0705178	-0.504501	-0.262311	0.261795	0.0439148	0.0438363	-0.0490744	-0.100236	0.062875	0.0562188	0.109804	-0.225207	0.0194655	0.054599	0.20943	-0.0435346	0.0874914	-0.102984	0.0189448	-0.00201517	0.201273	0.00964446	0.0717799	0.0778082	0.0714989
Serpina3m	0.514181	0.0808209	0.145695	0.158804	0.000464446	0.201702	0.14158	0.145754	-0.441674	-0.370387	0.0749364	0.0245332	0.15409	0.245992	-0.0171563	-0.0930672	-0.0526119	-0.16343	-0.244478	-0.0521656	0.0862168	0.0796878	0.133409	-0.0405194	0.202284	-0.00777537	0.00768945	0.05003	0.0156146
Clec5a	0.33825	-0.812942	0.00606879	0.0112926	-0.238485	-0.252173	-0.123247	0.0208504	-0.211251	-0.107853	-0.123207	-0.018636	0.00403894	-0.00453684	-0.0516392	-0.00880902	-0.0338964	-0.0439088	0.029363	-0.0601772	-0.0171915	-0.00651987	-0.0352198	0.0490317	-0.0145232	-0.00791092	-0.0325049	0.031074	-0.00718676
Ms4a7	-0.255178	-0.497985	-0.215465	-0.124979	0.0426892	-0.516513	-0.112347	0.232071	-0.0611085	0.136691	-0.0690663	-0.233037	0.0105057	-0.0258858	0.228241	-0.115894	0.0133172	0.0840469	0.161667	0.00914983	0.0147777	-0.0773858	0.155067	0.194739	0.16892	0.0545141	0.0486798	0.0754741	0.027454
Ear6	-0.402886	-0.202614	0.527512	-0.291197	-0.266003	0.100204	-0.061152	0.0044662	0.194845	0.147722	0.314046	-0.114637	0.0830429	0.0906968	-0.0591546	-0.293838	0.0945899	0.121259	-0.180669	-0.000393429	0.0352459	-0.0232967	0.031855	-0.0155336	-0.055328	0.0875691	0.0181332	0.0305565	0.0341768
Lgi2	0.696522	-0.22041	0.128035	-0.0423374	0.348495	-0.0167535	-0.296493	-0.0289546	-0.000351412	0.221571	-0.061704	0.0621372	-0.169539	-0.138091	-0.11314	-0.0573956	-0.185562	-0.033326	-0.0662201	0.09879	0.190238	0.0925773	0.0948461	-0.0565074	-0.0149215	-0.0917229	-0.0345124	0.0216092	-0.00362055
Retnla	0.541189	0.25735	-0.262454	0.10505	-0.405115	0.101848	-0.0206284	-0.170482	0.17067	0.0889269	0.0837501	-0.108774	0.131706	0.0964501	0.344092	0.0729179	0.199773	0.0250015	0.0027804	-0.196225	-0.0898273	-0.0480355	-0.203718	0.0729724	0.0279104	-0.0484024	0.0970515	-0.0347801	0.0272269
Aif1	0.428049	-0.625339	-0.000707809	0.0949912	-0.161207	-0.465121	0.0157495	0.0910938	0.0643637	-0.127809	0.164788	-0.0393794	0.108623	0.00817915	0.133692	-0.0245757	0.213627	-0.0328916	-0.133397	-0.0239222	-0.0650226	-0.0918105	0.0141102	0.0389464	0.0113085	-0.0153516	0.017608	0.0748144	0.023952
Ccr5	0.496405	-0.432492	-0.00689744	-0.345229	-0.464981	0.0414453	-0.144329	0.102945	0.209666	-0.0741902	0.0564307	-0.0824213	-0.0357955	-0.182257	0.229302	0.082187	0.0599038	0.0623772	0.0908489	-0.0119155	0.130489	-0.053827	0.00206917	0.0494989	-0.0352965	0.0158674	-0.0268637	0.064341	-0.00782615
Sdf2l1	0.718085	0.209847	-0.106791	0.069116	-0.304399	0.363835	0.115148	0.29846	0.0998859	-0.0919624	0.0110525	-0.101828	-0.118148	-0.169766	0.0236285	-0.097535	-0.0597558	0.00656334	0.0359325	-0.016282	-0.0211582	-0.0145473	-0.0177851	-0.0703585	0.0113617	-0.0487706	0.000128521	0.0288036	0.0235699
Prdm8	-0.4672	-0.535789	0.0874815	0.496849	-0.0863586	0.165417	0.100407	-0.143669	0.0327749	-0.0174892	0.0317741	-0.156036	-0.0939998	-0.00484192	0.0860083	-0.0431489	0.0849972	0.0896647	0.0701554	-0.0441252	-0.0372312	0.258709	0.0899627	-0.0728445	0.108648	-0.0549273	-0.0276198	0.0980931	-0.026229
9030425E11Rik	0.682787	-0.415276	0.139515	0.250894	-0.0465514	-0.271044	0.0147032	-0.0994291	-0.202672	-0.0538324	-0.135263	-0.122432	0.0400633	-0.101344	-0.199387	0.136762	0.100558	-0.127261	-0.0407955	0.0409705	0.0703305	0.0443047	0.0516081	-0.0408719	-0.0489413	-0.00476542	-0.0220697	-0.0416362	-0.00868808
Ccl3	0.489147	-0.722724	-0.123762	0.00409644	-0.0997532	-0.0744425	-0.249496	0.0432251	-0.0972353	-0.201236	-0.143604	0.108055	0.0811657	0.0863682	-0.128531	-0.0722282	-0.00848536	-0.0573603	0.0620109	-0.0503532	-0.0491657	0.059591	0.00497712	0.0444804	-0.0813203	0.0223456	-0.0203768	0.00892324	-0.0104032
	0.397406	-0.594916	-0.0427032	-0.131344	-0.368959	-0.237543	-0.0393961	0.111283	-0.0934302	-0.120271	-0.328714	-0.21211	-0.194654	0.0701662	-0.0396292	-0.0565885	-0.0189263	-0.054648	-0.086717	0.0336876	0.0369441	-0.0203229	0.127842	-0.0589727	0.00811794	-0.0374243	-6.32618e-05	0.0372573	0.0479404
Cd300lf	0.336331	-0.820349	0.0842835	0.0492165	-0.0543932	-0.0971889	0.19128	0.115646	-0.203689	0.0245535	-0.169968	0.0861385	-0.0462162	0.105795	-0.0225552	-0.0560233	-0.145098	-0.0984719	0.0538643	-0.0434194	-0.0501155	-0.0523871	-0.0260617	0.0261791	-0.0393773	-0.0412881	-0.0258299	0.0201697	0.0124028
Asgr1	-0.717666	0.0856298	-0.00755893	-0.0892015	0.00324647	0.245907	-0.339525	0.0350224	0.107856	-0.00574007	-0.14748	0.129672	-0.0702035	0.299172	0.00791422	0.198957	0.0766736	-0.282988	-0.0119273	0.0598168	0.106824	0.0211382	0.0723565	0.0338198	-0.00504922	0.0120037	0.00253765	-0.0136545	-0.00581241
Csf3r	0.645953	-0.0203068	0.157392	0.462653	-0.0374459	0.0169231	0.289546	-0.0928913	0.0752917	-0.130146	-0.161475	0.146064	-0.0566905	0.143596	0.161627	0.0603919	-0.178472	-0.0715705	0.0121189	0.199554	0.189955	-0.052914	0.0403693	-0.0516503	-0.0249703	-0.0660016	-0.0249893	0.00254157	0.00166092
Trem2	-0.0274227	-0.475455	-0.21793	-0.298047	0.324734	-0.357179	-0.156689	0.341658	-0.0326481	0.0025678	-0.0794338	0.00346264	0.0553067	0.0313665	-0.0653383	-0.167433	0.0135065	-0.0252722	0.116897	0.0437322	0.0538363	-0.335399	-0.0863185	-0.0440569	0.125317	-0.125766	-0.0315485	-0.138173	-0.161321
Ms4a11	0.65144	-0.351285	-0.313458	-0.221667	0.160895	-0.299927	0.21031	-0.107899	0.12715	0.0529345	0.213589	-0.0809139	-0.105696	0.1614	0.00323776	-0.0742292	-0.0410446	0.0251054	0.0620468	-0.079853	0.0321723	0.0137647	-0.0155326	0.0112909	-0.0458655	0.0355142	0.0368918	0.0182465	-0.00671014
Gria1	-0.570386	0.0176547	0.108434	-0.315001	-0.0178969	-0.0761879	-0.0209233	-0.660248	0.100609	-0.0196548	0.110548	0.153537	-0.0548136	-0.139747	-0.0282485	0.0573732	0.0923821	-0.0215535	0.0461544	-0.0139409	0.0181892	0.0485466	0.0689619	-0.000960694	-0.154498	-0.0101418	0.0215519	0.0504305	-0.0469
Sox7	-0.433409	0.312521	0.455438	-0.0184123	-0.0732389	-0.0862063	-0.290256	-0.185956	0.0229316	-0.0195441	-0.0651485	-0.321941	-0.120228	0.149395	-0.0156565	-0.0729341	-0.220013	0.0991856	0.094536	-0.0452669	-0.0972986	0.00254977	0.117063	-0.115218	-0.109642	-0.20484	-0.163673	-0.18588	0.0544187
Tgfbi	0.766383	-0.326267	-0.117911	-0.148235	0.138424	-0.241568	0.216469	-0.000258959	0.148083	-0.0167312	-0.0301904	-0.00358888	-0.190285	0.123109	-0.133965	-0.0567473	0.0324491	0.0440399	-0.156282	0.0776749	0.0650183	-0.00281818	0.0796679	-0.0662791	0.0235175	-0.0182374	0.0273992	-0.0119152	0.00937785
Cxcl12	0.708766	-0.0992315	0.0669314	0.0572035	0.236032	-0.124146	-0.44189	0.181572	0.102953	-0.0749952	-0.143231	-0.174947	0.0596076	-0.142614	-0.194149	0.121011	-0.0310383	0.0670799	0.100648	-0.00859395	0.00951183	0.0915757	0.00254228	0.0694676	0.000503903	-0.00977993	-0.0305806	0.0830276	0.0147795
Ms4a7	-0.321089	-0.47226	-0.192265	-0.120129	0.0250836	-0.542585	-0.17014	0.228502	-0.0360192	0.104116	-0.0437738	-0.22589	0.014359	-0.0126536	0.170911	-0.134752	0.0211368	0.0700751	0.137389	-0.0322409	0.0983273	-0.192361	0.00921214	0.0671779	0.211383	0.0508189	0.0525545	0.0751131	0.0355127
Lgals1	0.719682	0.176647	0.185448	0.294292	0.35748	0.117146	-0.00315192	0.187665	0.210721	-0.168711	0.0663212	-0.0640801	0.0871452	-0.0154273	-0.0770208	-0.00310239	-0.00241582	-0.0335723	0.127566	0.157856	0.00492889	0.0123512	-0.0426322	0.00632114	0.0813186	-0.0704812	-0.0139057	0.0270706	0.0331749
Galntl2	-0.798681	-0.0554106	-0.339748	-0.148742	0.245158	-0.129229	0.086433	0.058873	-0.060396	-0.160037	0.0758408	-0.0458269	-0.00164303	-0.0133112	-0.0835877	-0.161509	0.136929	0.136201	0.00564293	-0.0998591	0.0453275	0.0830504	-0.0378852	-0.0187239	0.000707796	-0.0597728	-0.00469167	0.0372334	-0.0189767
Rbp7	-0.345833	0.284909	0.155947	0.428751	0.335538	-0.190244	0.258745	0.320931	-0.122841	0.108807	0.267357	-0.19034	-0.109161	-0.0859089	0.0740979	-0.0101879	-0.142061	0.0423765	-0.231656	0.143317	0.0245094	-0.0970989	-0.0495331	0.00336238	-0.0267129	0.0296059	0.0103507	0.0163507	0.0467597
Bcl6b	0.283869	0.176353	0.651917	0.387364	-0.179999	0.0832626	-0.187555	-0.0125626	-0.0176976	0.140596	-0.0973735	-0.0192488	-0.0243591	0.177584	-0.0677826	-0.259393	-0.0239967	-0.000814415	0.182857	0.0254154	0.0042171	0.104458	0.100443	0.0630931	-0.00141173	-0.0331258	-0.193403	0.0122684	-0.0796866
Hlf	-0.326091	0.00412421	0.782723	-0.217361	0.347873	-0.0198399	-0.0869997	-0.0655557	-0.0385775	-0.102234	0.0101626	-0.0417344	0.0106607	0.0588128	0.0122076	-0.124238	-0.0635122	0.122709	0.095205	-0.0882812	0.164691	0.0265914	-0.0208757	-0.0174206	0.00237536	-0.0171958	0.023756	0.0413595	0.0208532
Tsc22d3	0.579256	0.449235	0.296964	-0.262546	-0.00972118	-0.0599063	0.204001	-0.134111	0.128547	0.13721	-0.0427162	-0.130041	-0.0684705	-0.306478	-0.182711	-0.0328262	0.173541	0.00936925	0.0777471	-0.0217504	-0.107178	0.00985837	-0.0153102	-0.0272142	-0.00810392	-0.0403173	0.0621521	0.0152642	-0.00387308
Hspa8	0.570972	0.623415	-0.158522	-0.13248	0.249072	0.124477	0.100746	-0.0246854	-0.0920645	-0.0485847	0.051609	-0.0832666	0.0302071	-0.0908264	0.0646398	-0.0434192	0.0868022	-0.0308174	-0.0396515	-0.110438	0.0333017	0.00324179	0.145286	0.0582933	-0.196848	-0.127026	-0.106054	0.0685056	-0.0032061
Xtrp3s1	0.556897	-0.465885	-0.0366941	-0.380792	-0.0938247	-0.241741	0.37508	-0.0156501	-0.0359713	0.124571	0.136432	0.0376887	-0.0498017	-0.0800344	0.0200509	0.194846	0.0979806	0.102353	-0.00532232	0.0498473	0.0888545	-0.0434461	-0.0121696	-0.00239608	-0.0206382	0.0191536	0.0183038	-0.0226322	0.00557841
Il6	0.644169	-0.136502	-0.0043465	-0.066221	-0.106129	0.148419	-0.0401212	0.325576	0.0187523	0.0928516	-0.0404157	0.0736739	0.0980865	-0.353954	0.201967	0.00220287	-0.0831575	0.175354	0.169801	-0.0746193	-0.236458	-0.109259	-0.200511	-0.0225677	-0.0914807	0.144731	-0.0168781	0.0944702	-0.101093
Fxyd4	0.198023	-0.159741	-0.496568	-0.410355	-0.244602	0.0363927	-0.290145	-0.29222	0.273192	0.0710407	0.194363	-0.0666804	0.191606	-0.00543748	-0.0215724	0.136595	-0.0731685	0.0199159	-0.0386679	0.0915792	-0.123149	0.119839	-0.0337849	0.0502281	-0.0964461	-0.213356	-0.0426364	0.0428874	-0.0670442
Il8rb	0.669148	0.349908	0.0087508	0.366973	-0.140827	0.100474	0.269288	-0.236013	0.0107331	-0.130755	-0.080774	-0.0849087	-0.131124	0.218292	0.0110255	-0.0876385	-0.114337	-0.0055099	0.110947	0.0189752	-0.0515694	-0.0207014	-0.0382804	0.00589451	-0.0236939	0.0271909	0.0172011	-0.0251916	-0.02701
Ccl19	0.419486	-0.660783	0.0877685	-0.16571	-0.229352	0.0626977	0.267576	0.113119	-0.105942	-0.126826	-0.147291	-0.143464	-0.207364	0.197349	-0.0695786	0.000837357	-0.057694	-0.101249	0.0421865	-0.0855577	-0.0143173	-0.0758252	-0.0240321	-0.0939142	-0.0342462	-0.0683469	-0.0519417	-0.0756173	0.0514098
Nup155	0.756354	0.109219	0.0748461	0.320153	0.0139639	-0.221189	0.198469	0.0896803	0.142285	0.0838697	-0.165632	0.166037	-0.139212	-0.124511	0.0412184	0.0568289	-0.078605	-0.0196527	-0.157463	-0.0407317	0.0373664	-0.052845	-0.168292	0.135059	0.0583323	0.0302854	0.00158038	0.024397	-0.0238072
Ogn	-0.786298	-0.114406	-0.00399258	-0.337623	-0.247306	0.0313151	0.0197882	-0.146109	-0.298077	-0.148043	0.0994876	-0.0817944	-0.00849436	0.0216632	0.0222801	0.0328644	-0.00487686	0.155298	0.000539814	0.0675295	-0.0376797	0.0112696	0.00320739	0.0577833	0.0358492	0.0635056	0.0357543	-0.0318421	-0.00893747
	0.548072	-0.312081	0.03211	-0.128022	0.0634317	0.363711	0.0758635	-0.384256	0.122509	-0.0860951	0.0435508	-0.101775	-0.0681161	-0.167786	-0.0949986	-0.0198043	-0.155718	0.0329317	0.410471	0.0253542	0.0845563	0.0857481	-0.055934	-0.0227134	-0.0118571	0.00766616	-0.0212029	-0.0231797	-0.0663695
Tspan4	0.275853	-0.0502098	0.620501	-0.121484	0.55043	0.0476697	-0.0727108	-0.0161074	0.00805494	-0.263935	-0.00244868	0.127871	0.00907514	-0.00622909	0.0634678	-0.0802814	-0.0610732	0.0526423	0.102266	-0.1329	-0.103803	0.0435671	-0.00342552	0.0709893	-0.111556	-0.0065376	0.0585157	0.00767519	-0.214052
Ffar2	0.52996	-0.642359	0.0114737	0.0374135	-0.0213793	-0.220646	-0.0523367	-0.0388784	0.0147691	-0.314364	-0.0890827	0.168932	0.161579	0.176404	-0.00346211	-0.0989552	0.111276	-0.105203	-0.0279295	-0.0309586	-0.0952009	0.0614065	-0.030882	0.0263153	-0.0613166	-0.0505069	0.00217803	-0.0390036	0.0392542
Dnaja1	0.545731	0.593241	0.169681	-0.24631	-0.196524	-0.187945	-0.123485	0.151854	0.140478	-0.0638422	0.109544	0.111793	0.151074	0.112887	-0.0621983	-0.0737765	-0.0445537	-0.0445643	-0.0010725	0.0480968	0.0253816	0.0142723	-0.0340203	-0.0931261	-0.0821578	0.0974276	-0.103536	0.0641357	0.0854673
Ifi44	0.232182	-0.748949	-0.0310954	0.0234157	-0.31335	-0.358933	-0.099767	0.129744	-0.231241	-0.0980463	-0.190909	0.00911248	0.0308498	0.0499912	0.00749858	0.0215636	-0.0214761	-0.0626042	0.0895099	-0.0905524	0.00169086	0.0220938	-0.00988743	0.0265317	-0.0312046	0.00232571	0.0146474	-0.00375738	0.0562508
Siglecf	-0.684658	-0.419036	0.340159	-0.193528	-0.276381	0.130034	0.0312886	-0.041262	0.025552	0.0367267	0.119295	0.048713	-0.177265	-0.152012	-0.0516069	-0.0392059	0.082595	0.0253433	-0.0397499	0.0190929	-0.00431151	-0.0804293	0.0741343	-0.0235538	-0.0670247	-0.0228277	-0.00673247	0.0233141	0.0403512
Itih5	-0.443502	0.475911	-0.243811	0.236204	0.462841	-0.213876	0.0370274	-0.0299651	0.294962	0.0910712	-0.128615	-0.0981365	0.121809	0.0268161	-0.0411618	0.176962	-0.0141627	-0.013566	-0.0783073	0.0829037	0.0363334	-0.0773009	-0.0559941	-0.017077	-0.0397438	0.0416234	-0.0140635	-0.0312941	-0.0266003
Pde4b	0.434241	0.280157	0.623111	-0.0135323	0.00125334	0.193467	-0.0535879	-0.0978756	-0.0232351	0.152199	0.0681856	-0.18766	-0.347082	-0.0404899	-0.240017	-0.0426942	0.0346593	0.136374	0.0597589	0.127438	-0.0796369	0.0129094	0.00428266	0.0319079	0.0221045	0.00340038	0.0213271	0.0356146	0.0113303
Cyp1a1	-0.542971	-0.313497	0.037594	-0.165871	-0.0891556	0.113987	-0.122004	0.0114384	-0.0233272	-0.164372	0.0682691	-0.0547533	0.113611	0.0821938	0.279511	-0.178225	0.0271381	-0.357938	-0.27408	0.339035	0.092215	0.0545825	0.15247	-0.0777883	-0.0958187	-0.0352068	0.0679148	-0.0289917	0.0408396
Il18bp	0.608562	-0.52202	0.157676	-0.0301228	-0.241976	-0.284224	0.15547	-0.0631208	-0.161734	-0.0575467	-0.0348029	0.153872	0.237909	-0.0664218	0.0297343	0.0978392	0.0614273	0.0850541	0.11214	-0.075384	0.0773353	-0.0192579	-0.0112064	-0.00980671	-0.00508411	-0.031174	0.0117755	-0.0192477	0.0267328
Pbp2	0.627279	-0.122566	0.0666075	-0.0456789	-0.176989	-0.173108	-0.0525477	-0.242931	-0.175165	-0.0842808	0.427766	0.0997487	0.0540637	-0.282786	0.242368	-0.0522248	-0.0822766	0.118743	0.124066	-0.0499092	0.051812	0.206594	-0.01788	0.0169323	0.024347	-0.0205555	-0.00752675	0.0306802	0.0094453
S100a4	0.583785	-0.540523	-0.289304	-0.347681	-0.0655694	0.23906	0.0957813	0.175684	0.116915	0.0591488	0.0515479	0.043637	-0.0215345	0.0200059	-0.0338739	-0.0778437	0.0525767	0.125286	-0.012183	-0.0297819	0.0304375	-0.0378385	-0.0293364	-0.0550236	0.0307359	0.0124766	-0.033688	-0.0260374	-0.0500593
Adamts9	0.725071	0.470971	0.265645	0.123584	-0.297813	0.0613401	-0.00627382	-0.0741083	0.0273644	-0.0178988	0.07428	0.0982738	-0.0277157	0.068894	0.0890784	-0.0333595	0.0732555	0.127891	-0.00540084	0.0947051	-0.010098	-0.0190589	0.0305358	0.0450504	0.0234817	-0.00954718	0.000126954	-0.0319915	0.0448498
Maff	0.586595	0.557639	0.218757	-0.218009	-0.203117	-0.0688836	0.0852499	-0.0652884	-0.0123141	0.0551195	0.0576004	0.145645	-0.145172	-0.0907442	-0.0601378	-0.166679	0.0253635	-0.00459738	-0.0457994	-0.0266036	0.0908052	-0.12149	-0.250531	-0.00970825	0.107002	-0.0449013	-0.00467128	-0.0139067	0.0242249
Uhrf1	0.670038	-0.114815	0.07248	0.118334	0.0250887	0.313186	-0.492945	0.0477165	0.151436	0.0402761	-0.025903	-0.0705345	-0.254118	0.0708994	0.0419353	0.0318238	0.063482	0.045489	-0.0622902	0.122815	-0.144241	0.010578	0.045167	-0.132502	-0.0486535	-0.000778379	0.0143383	0.0372164	0.0501349
Cpne5	-0.819417	0.0179897	0.182801	0.272177	-0.0332952	0.220375	0.135771	0.0270393	-0.0805173	0.110909	0.116059	0.171456	-0.0972909	0.0702367	-0.144496	-0.10427	0.0344817	-0.153317	-0.0533369	0.0128128	0.0449345	-0.060969	0.0755365	-0.0413515	-0.0208134	-0.0452619	-0.000938064	-0.00764915	0.0264361
Map3k6	0.441529	0.509699	0.0104141	-0.526415	0.175019	-0.0808454	0.0715847	-0.00869044	-0.114724	-0.178214	0.0057987	0.104159	-0.0594658	-0.115533	-0.0607718	-0.0519675	0.0413905	0.150438	0.0208532	0.0723234	-0.132312	-0.0511175	0.0596689	0.041999	-0.176978	-0.223912	-0.0949418	-0.00677715	0.0247955
AU018778	-0.774196	-0.262807	-0.0828637	-0.0162058	0.258888	-0.0473114	-0.236372	-0.0180924	0.208629	-0.205825	-0.179649	-0.119957	0.0956989	-0.0439332	0.0852149	0.153315	-0.0655143	-0.0636813	0.035377	0.0635732	0.0207489	0.0454122	-0.0497492	0.0116772	-0.0730334	0.00757611	-0.00381138	-0.0200753	0.00083498
Pilrb	0.506115	-0.210525	-0.0481387	0.308121	-0.22288	0.178473	0.389584	-0.09419	0.0720806	-0.237933	0.107416	-0.219855	-0.0474387	0.188181	0.032863	-0.165724	-0.262392	-0.196797	-0.0435736	0.185833	-0.0671902	-0.0981656	0.0591891	-0.068663	0.0465471	0.0234425	0.0384709	-0.0268498	0.0301585
Ms4a6d	0.68989	-0.398974	-0.135505	-0.379889	0.0296533	-0.139624	0.285798	0.0228474	0.139699	0.0895334	0.125063	0.14676	0.0152881	0.0317465	-0.040469	0.0178406	0.107553	0.108519	0.0504432	-0.00862063	0.0537727	0.00392747	-0.00669621	-0.0169102	-0.0247832	0.0255738	-0.00714686	-0.00986788	-0.0330313
Steap4	0.792151	-0.102703	-0.129447	-0.212265	0.148318	-0.227179	0.120275	-0.0379033	0.238291	-0.145875	-0.0739711	0.0446866	-0.246665	0.00619243	-0.06826	0.0735784	-0.0268324	-0.0123144	-0.0800749	0.127261	0.0943196	0.0823354	0.0825617	-0.0712473	-0.045453	0.023879	-0.0103523	-0.0167264	-0.00826047
6720401G13Rik	-0.234877	-0.678686	0.396671	-0.0656052	-0.0443082	0.15086	0.223278	0.0719219	0.157419	0.305798	-0.0815042	-0.0122176	0.225651	-0.00413086	0.0533547	-0.0694789	-0.137417	-0.0309427	0.0830427	0.118241	-0.111311	-0.0041996	0.0326794	0.0555076	-0.00835825	-0.0132652	-0.0192293	-0.0154158	0.0315571
Bcl2a1b	0.326371	-0.781949	0.0133194	0.0577641	-0.291369	-0.227758	-0.16621	0.231882	-0.0152736	-0.0441221	0.138733	-0.0423555	-0.00579951	-0.000580435	-0.018913	-0.068006	0.0804041	0.107656	-0.0607322	-0.0265655	-0.00708538	0.00769447	0.0223109	0.0864469	0.0139532	0.00348706	-0.0332962	0.0160962	0.0043647
Nr1d2	-0.0571417	-0.153339	0.781654	-0.28153	0.310314	-0.119913	0.0463301	0.0319457	0.00099014	0.0381328	-0.0561695	0.0908514	0.135265	0.00479929	0.271307	0.0150519	-0.0246498	0.0962974	-0.00431481	-0.0549208	0.182904	-0.0231178	-0.0933653	-0.0837046	-0.00986606	0.0360198	-0.00594374	0.00146522	0.00783349
Rgs1	0.372227	-0.718363	-0.178601	-0.0247785	-0.0118374	-0.252421	0.132546	0.391136	-0.112638	0.166745	0.0458444	0.0375297	-0.108469	-0.0418278	-0.00214725	-0.0215057	-0.00166686	0.00033499	-0.0370209	0.0234758	-0.00129834	-0.0701031	-0.10727	0.0249742	-0.0160892	0.00770125	-0.00147591	0.0193201	-0.0287728
Csf2	0.617109	-0.544828	0.0497488	-0.195017	-0.0273647	-0.193901	-0.0575643	-0.167693	-0.228794	0.000493349	-0.00562422	0.3422	0.12486	-0.00186384	0.0177196	0.023333	0.0255335	0.0649799	0.00510973	-0.044768	0.00681326	0.115822	0.0304232	0.00595475	-0.0268042	-0.0383277	-0.0506893	0.00262646	-0.00543738
4833422F24Rik	0.443631	0.120364	0.0120091	0.0582763	0.183089	0.117817	-0.302378	0.527891	-0.163727	0.0570515	0.223044	0.0199553	-0.0829728	0.0324997	0.319675	0.144996	-0.175164	0.0631741	0.0814107	-0.0675279	-0.259231	0.00131122	0.00190169	-0.156777	0.0952818	-0.0326467	-0.0811234	0.0435091	-0.00546747
Slc13a4	-0.732398	-0.207076	-0.26772	-0.268136	0.226302	0.0330911	0.108394	-0.123579	-0.0701193	-0.172841	-0.210003	-0.112441	-0.116914	0.220759	-0.0169525	0.0286424	0.0829006	0.13623	0.0320625	0.0362311	0.0274507	-0.0245762	-0.0899371	-0.00186316	-0.0300249	0.0146792	-0.0643419	-0.0094419	-0.014139
Arg2	0.653816	-0.402611	0.0768969	0.146615	0.232577	-0.119196	0.226128	-0.201158	-0.0150987	-0.167092	-0.186006	0.171686	-0.0128826	0.112933	-0.140447	0.00472395	-0.0875477	0.134688	-0.0541332	0.250826	0.0230538	-0.0230729	0.0410728	-0.0281416	-0.013835	0.0299076	-0.0114948	0.00907708	0.0417089
Mmp9	0.659658	0.212233	0.0239988	0.596452	-0.122704	-0.0719591	-0.000807975	0.096361	0.193755	-0.0574251	-0.0816304	0.0928158	-0.0534175	0.0783406	0.147012	0.138781	0.0194291	0.104941	-0.0279201	0.0956221	-0.00549528	-0.0437283	-0.0196301	0.0399868	-0.0267057	0.0125059	-0.0155802	-0.0282277	-0.0287852
	0.52532	0.640613	-0.262618	-0.150025	0.147216	0.104875	0.0854027	0.0877885	-0.141032	-0.121784	0.03902	0.0294622	-0.0169391	-0.0410452	0.109839	-0.0728807	0.0265229	0.08155	0.0303843	-0.0827621	0.0904308	-0.0291951	0.20349	0.061948	-0.0518853	0.154356	0.107423	0.100871	-0.0202904
Ces1	-0.64964	-0.368284	0.229784	0.109275	-0.20753	0.0862637	0.0388765	0.0112076	0.0548378	-0.13529	-0.201961	-0.0504513	0.0333533	-0.362971	-0.122264	-0.0942751	0.106198	0.0583137	-0.191396	0.166508	-0.00971416	-0.0644144	0.0699952	-0.0994517	-0.0708471	-0.0289671	0.0045211	-0.00825918	-0.00940913
Muc20	0.515954	-0.0310787	-0.323088	-0.397644	-0.238764	0.192716	-0.425396	-0.272915	-0.0605627	0.091614	-0.0596076	-0.0914812	-0.0313322	0.00770929	0.0942554	-0.150591	-0.0172878	0.0659806	-0.103518	0.09898	0.0795987	0.151821	0.0454741	-0.00463318	0.0562852	0.000420993	0.0548874	-0.0200347	0.0303018
Nxph3	-0.721511	-0.0681734	-0.137235	0.402427	-0.337221	0.0366257	0.119856	-0.114382	-0.0305454	-0.107161	0.115032	-0.0339668	0.053392	0.183721	-0.0546803	-0.0349292	-0.0683124	0.00049705	-0.059295	-0.0292773	0.0532207	0.191874	-0.109567	-0.0534121	-0.0217214	0.0670864	0.0772249	0.0711534	-0.0657555
Dpep1	-0.689815	-0.0706083	-0.237331	-0.561406	0.00574859	0.0194473	0.0913295	-0.0391854	-0.266121	-0.072095	0.0341008	0.0534058	0.00453054	0.0213029	-0.11738	-0.129002	-0.0852217	-0.0111995	-0.0130384	-0.0713436	-0.0290352	0.0667946	0.00392077	-0.0535327	0.0202518	0.0200202	0.0442703	-0.0381224	0.0373479
Bhlhb8	0.0362544	0.0844868	-0.617925	-0.173114	0.372883	0.0366429	-0.221613	-0.104419	-0.149788	-0.210523	0.0337808	-0.0364018	0.146339	-0.0169371	-0.0314856	0.0811237	-0.0601106	-0.0432897	0.256753	0.0356589	-0.0283093	0.0281818	0.0435613	0.117059	0.0580861	0.114678	-0.119967	-0.399069	0.0282874
5430416O09Rik	-0.175122	-0.28701	-0.627604	0.32083	-0.408026	0.0842242	0.100651	-0.0659661	-0.199364	0.065558	-0.00619096	0.0964361	0.066773	-0.192368	0.0438903	0.231111	-0.0948866	-0.137007	0.0987153	0.0317569	-0.00695753	0.00737625	0.0487897	0.0480384	-0.0143406	-0.0507139	-0.0540665	-0.00588517	-0.053281
Clec7a	0.344192	-0.808042	-0.0194319	0.00904983	-0.0470123	-0.155148	0.143735	0.301702	-0.0901475	0.14117	0.113151	-0.0109062	-0.100432	-0.0203717	-0.0419475	-0.119579	-0.017511	0.0661986	-0.0882832	0.0408269	-0.0315021	-0.0195344	-0.0542936	0.0279508	0.0227742	0.0462184	0.0134339	-0.0232589	-0.00303986
Dmn	-0.561391	0.365094	-0.219524	-0.0226604	-0.384035	0.30239	-0.189624	-0.195547	0.0934917	-0.0923958	-0.180262	0.160208	-0.146134	0.00122772	0.0448787	-0.230358	-0.0949302	0.0913711	-0.0621496	-0.0210066	-0.0620131	0.003876	0.0145534	-0.0498046	-0.0943336	-0.0165353	0.00118106	-0.0214127	0.000622732
Itih4	0.708883	-0.390342	-0.153434	-0.0460715	0.207039	-0.100286	0.167561	-0.283656	-0.0296011	0.0465002	-0.158919	-0.182783	-0.1382	0.0354699	-0.151681	-0.0361786	-0.0311579	-0.15293	-0.0139681	-0.0157847	0.06411	0.0896044	0.0174966	-0.0727729	-0.0521839	-0.0156368	0.00618004	-0.0726684	0.0280499
	-0.731267	0.0670727	-0.463101	0.208074	-0.128879	-0.131315	0.169167	0.134359	0.00982643	0.254082	0.0526593	-0.0114018	0.00751687	0.0834925	0.00267158	-0.0260943	-0.025773	-0.124117	-0.00190223	0.0616567	0.0487993	-0.110693	-0.0548978	-0.0400198	-0.0851528	0.0165962	0.0233378	-0.000216503	0.000913062
Cyt1	-0.503501	0.229564	-0.500185	-0.365861	0.00089925	0.0729411	0.151711	0.0546943	0.209597	0.00918532	-0.259395	-0.115766	0.0509087	-0.0617381	0.0223826	0.0361237	-0.0893943	-0.0281549	-0.128355	0.0850876	0.106403	0.123058	0.169315	0.223479	0.00603409	-0.00504504	-0.047652	0.027576	-0.0695657
1810009M01Rik	0.754106	0.0784556	-0.283166	-0.312674	0.0408525	-0.0749122	0.13734	-0.38498	0.0955817	0.020418	-0.0588908	-0.0828652	0.0573038	-0.0288553	0.0161557	-0.057096	-0.0047129	0.0892294	-0.0413638	0.0696564	0.118111	0.0718286	0.0416423	-0.061495	0.0138253	0.0359208	0.0417259	-0.0495903	-0.0221219
Rrbp1	0.858979	-0.174098	-0.146561	-0.195575	0.0294099	-0.0659616	0.178162	0.0650357	0.111313	0.0877285	-0.130717	0.0721652	-0.0511531	-0.0338523	-0.120052	-0.0107575	0.052792	0.200061	-0.101086	-0.0254985	-0.106378	-0.0492834	-0.0381562	-0.0356518	0.00975577	0.00212331	-0.00107233	-0.000935415	0.00160637
	0.538477	0.593923	0.150989	-0.253503	-0.18859	-0.204959	-0.128675	0.143778	0.142687	-0.0713026	0.107959	0.10683	0.159002	0.113614	-0.0527872	-0.0825767	-0.0440606	-0.0585485	-0.00368977	0.0486396	0.0241696	0.0095604	-0.0271734	-0.103009	-0.0748845	0.0986943	-0.103364	0.0762328	0.086649
Lrg1	0.531006	-0.480151	-0.143531	-0.0584898	0.145116	0.00623323	0.243943	-0.146011	-0.0249304	0.109109	0.19275	-0.419742	-0.126959	-0.00754448	0.125454	0.040068	0.128212	-0.206813	-0.0877594	-0.0663876	-0.0879369	-0.0280039	-0.0986171	-0.0495766	-0.0680256	0.0284497	0.0229293	-0.0633979	-0.0125263
Gsn	-0.659171	0.342501	-0.0802323	-0.102126	-0.130092	0.197921	-0.191507	-0.0771512	-0.159544	0.190543	-0.154728	-0.0943738	0.0439793	0.161104	-0.355111	-0.00276958	0.00392318	0.187551	0.0569299	0.00823372	0.107422	0.149128	-0.00339966	0.0784189	-0.0596997	-0.017695	0.0259413	0.0313291	-0.00405797
Gstm3	-0.629835	0.200667	-0.192909	-0.550224	-0.01763	0.0407833	-0.0197111	-0.0756259	-0.136542	-0.15601	-0.171557	-0.0141169	-0.0708318	-0.122978	-0.043895	-0.159155	-0.202002	-0.0488701	-0.0771493	0.0356977	0.027038	0.122363	0.072353	-0.126329	0.0625449	0.014216	0.0462744	-0.0348025	0.0142173
0610011I04Rik	0.6824	0.0462926	-0.182588	-0.274838	-0.26949	0.163236	-0.341975	-0.0387364	0.142545	-0.0794446	-0.257989	-0.0481942	0.0538021	-0.0567129	-0.124694	-0.0627402	0.155693	0.17616	-0.0902332	-0.0113381	-0.132636	-0.00400129	-0.0187576	0.0210128	-0.0320229	0.030612	0.0188837	0.0110716	0.00997986
Rbm3	0.326387	-0.574294	0.482615	0.184031	0.0483712	-0.0432637	-0.138435	-0.269885	0.114459	-0.203326	-0.0526266	-0.0362377	0.0717437	-0.0840909	0.184318	0.121802	0.155159	-0.164522	0.0683504	0.0920653	-0.080886	-0.0612301	-0.0422421	0.00550403	-0.049034	0.0377427	0.0281257	-0.00783641	-0.00547508
Bmper	0.555812	0.0937802	0.577132	-0.0183523	-0.086895	0.0113729	-0.153772	-0.212354	-0.175007	-0.094844	0.00172888	-0.0398434	0.289216	-0.126809	-0.116214	0.0768962	-0.119973	-0.00502956	0.0309455	0.152582	-0.216398	0.0121241	0.0369753	0.0755503	0.13661	-0.00225288	-0.00326663	0.0263238	-0.00171767
2810008D09Rik	-0.110335	-0.611789	0.408673	-0.157881	-0.00798082	0.313044	0.329471	0.0782435	0.192565	0.193291	-0.186659	-0.0904017	0.00403594	0.113445	0.163571	-0.0365976	0.0724723	0.0921231	-0.00958106	-0.133567	0.00678352	0.0270862	0.0981979	0.0700742	0.00403552	0.00428849	-0.050462	-0.0182948	0.0225755
Nfkbiz	0.435595	-0.68765	-0.220531	-0.170312	-0.0132031	0.172468	0.114495	0.0761368	-0.159364	-0.0409675	-0.193042	0.256875	0.171746	-0.0701206	-0.0796217	-0.0946884	-0.0367919	0.0257025	0.106554	-0.0431932	0.00164124	0.0701209	-0.0636334	-0.0575744	-0.0345013	0.0231112	-0.0309814	-0.0083102	-0.0247746
Itga7	0.395175	-0.198074	-0.489389	-0.485008	0.118432	0.218184	0.0531774	0.0325726	-0.145446	0.0187253	0.0966831	-0.279911	0.235126	0.176744	-0.0237718	-0.0243312	0.0230709	0.110695	0.123029	0.0481791	-0.00992036	0.101967	-0.0577953	0.0390834	0.0681493	0.10397	-0.0252945	-0.0260039	-0.07135
Htra3	-0.634903	0.0736388	-0.513834	0.13671	0.228362	0.110092	0.0631349	0.0878382	0.0266407	-0.0731615	0.125892	-0.0546976	0.158221	0.195594	-0.0320916	0.161632	-0.0846436	0.0556863	-0.0832676	0.112361	0.148753	-0.0800212	-0.0442926	-0.00983122	-0.0140914	0.117348	-0.0503974	0.0943615	0.177805
S100a14	0.563162	-0.436564	0.024186	0.147137	0.256531	0.205121	0.0525101	-0.313528	-0.114939	0.258847	0.0934869	0.146727	0.161584	0.0967781	0.155953	-0.00913073	-0.0445754	0.0294766	0.157939	0.0788774	0.0368767	0.0540875	-0.0076617	-0.220715	0.0467629	-0.0203133	-0.017045	-0.0158042	0.0224765
1500041J02Rik	0.383749	0.428255	0.528431	-0.396133	0.108552	-0.124168	-0.0186073	0.0569152	-0.10161	0.101475	0.0472022	-0.130285	0.000284003	-0.0939502	-0.0320873	-0.0827865	0.140834	0.0282967	0.0259859	0.0716313	0.0108334	-0.0468195	-0.168174	-0.112002	-0.0314911	-0.0720122	0.18829	0.0270091	0.18416
Tgm1	0.541646	-0.475658	-0.0613958	0.0841434	0.133501	-0.166986	0.309214	0.199716	-0.146897	0.141388	0.181371	0.0284352	-0.154085	-0.0348769	-0.179907	0.149418	-0.162381	0.240281	0.0535105	-0.000415101	0.166108	0.0379414	-0.0603628	-0.0350626	-0.044427	-0.0164897	-0.0979308	-0.00163867	-0.0260765
Cdh16	-0.586631	-0.288587	0.29663	0.359854	0.0185561	-0.24851	0.0954764	-0.259193	-0.0500305	0.0665577	0.296942	0.0869709	-0.100048	-0.0364876	0.104875	-0.0353886	-0.00458006	0.0268387	0.0461858	-0.0466941	0.00655048	0.0114075	0.187879	-0.17896	-0.112466	-0.0511902	0.0478165	-0.0116929	-0.0138229
Cirbp	-0.546075	-0.64746	0.265459	0.210156	-0.103346	-0.0177455	-0.114118	0.00265265	0.159496	0.0721673	-0.0707093	-0.00563193	0.00896547	-0.00771672	-0.11544	0.0907081	0.0122558	-0.0471929	-0.0835476	-0.0623093	0.00658447	0.00651958	-0.0657068	-0.0370259	0.163477	0.170256	0.100157	-0.0336409	-0.0260163
0610011I04Rik	0.676171	-0.0521078	-0.291255	-0.266163	-0.189674	-0.0461235	-0.120516	-0.375398	0.140081	-0.127722	-0.073231	-0.156371	0.144185	-0.0275718	0.136477	-0.134362	0.172478	0.00962348	-0.139604	0.0751522	0.00252122	0.0614351	0.0399359	-0.03568	0.0223169	0.0385658	0.0464232	-0.0317564	0.00998711
Ctsc	0.31397	-0.73677	0.272308	0.0737811	-0.114458	-0.0457543	-0.288215	-0.0347719	-0.320371	0.115029	0.0154302	-0.0227668	-0.0721118	-0.0500475	-0.0119294	-0.0330417	0.0353973	-0.188303	-0.0387125	-0.0769664	-4.93951e-05	0.0355432	0.00769428	0.0130871	-0.0196728	-0.0298723	-0.0302211	0.0635358	0.0458891
Mybpc2	0.746967	0.0510883	0.00458803	0.252453	0.145128	-0.182056	0.252089	0.0414211	0.0655119	0.0122959	0.0157824	0.05827	-0.0990624	-0.0678287	0.124169	0.109209	-0.146312	0.0215557	-0.0830907	0.10567	0.0981829	-0.00851208	0.183344	-0.32938	0.0460967	-0.0986797	0.0180881	-0.0469312	-0.014399
Hspa8	0.5158	0.659293	-0.233963	-0.198629	0.140786	0.094275	0.115553	0.00688174	-0.121415	-0.147116	0.0491979	2.17884e-05	0.0107664	-0.00403003	0.139461	-0.0678597	-0.00810086	0.0833091	-0.052935	-0.10199	0.043087	-0.000404254	0.135635	0.0354814	-0.157272	-0.140739	-0.102463	0.0567325	0.00299413
Gpr171	0.518969	0.0495556	0.105081	-0.363625	-0.161943	-0.165645	0.161667	-0.0892489	0.167653	0.202246	0.0934771	-0.0716194	-0.3257	0.22844	-0.189543	0.233676	-0.0292136	0.069547	0.309568	0.0103725	0.201294	-0.0420786	0.0637024	0.0754798	-0.0323288	-0.0142875	0.085888	0.0530879	0.0197888
Hmox1	0.515071	-0.624977	-0.131669	0.0855085	0.337426	0.206868	-0.0874773	0.147657	0.0899413	0.106407	0.060609	-0.0158758	0.0185115	-0.0688297	-0.229424	-0.123573	0.0882195	-0.122368	-0.0294439	-0.0514838	-0.0102502	-0.000308558	-0.0268943	-0.0521018	-0.042353	-0.060594	-0.0235454	-0.0168522	-0.0301171
Mettl7a	-0.50874	0.315668	0.0904797	-0.161721	-0.066636	-0.138823	0.299984	0.247967	-0.365999	-0.0929985	-0.155451	0.207417	0.138773	-0.13639	-0.0648508	-0.168178	0.0345056	-0.0733091	-0.287384	0.00716595	-0.127556	-0.105586	-0.0566384	0.118061	0.0809803	0.0144022	0.0039795	0.0982381	0.0407992
Aldh2	-0.303449	0.595748	0.113699	-0.200506	-0.0324131	0.220361	-0.242505	0.186775	0.227447	-0.127172	0.0620595	0.0803048	0.111788	-0.0704582	0.0140042	-0.00635578	0.343833	-0.111516	-0.23239	0.19458	-0.119159	-0.070256	0.118502	0.0195188	-0.0073718	0.0129959	0.0156175	0.0637298	-0.00754757
Hnrpc	0.375195	0.513684	-0.352321	0.163933	0.137454	-0.0865595	-0.260232	0.0902129	-0.00450792	-0.17135	0.210601	-0.0346542	-0.240096	-0.179658	-0.102019	0.224249	-0.041755	-0.250703	-0.118006	-0.126545	0.0705859	-0.0160011	-0.000165721	-0.0361049	-0.117062	-0.00219652	0.0322066	-0.00361314	-0.0268161
	0.118311	0.0228298	-0.788413	0.147325	-0.390805	0.171295	-0.013853	0.0718033	0.0306523	-0.0432899	0.0632334	-0.0347867	-0.113185	-0.232866	-0.143482	-0.0107229	-0.0327677	-0.013797	0.0453842	0.0648585	-0.192943	0.0548223	0.0519859	0.0377732	-0.0344664	-0.0545985	-0.0287477	-0.0358406	-0.0288068
Ppp1r14d	0.409094	-0.225273	-0.448037	0.0730746	-0.291095	0.392288	-0.101517	-0.192281	0.118006	0.0933756	0.107457	-0.0642862	0.183651	0.344212	0.0875642	-0.00663234	0.153527	0.133588	0.0300475	0.0993437	0.144275	0.0365246	-0.0915538	0.0653782	0.0163471	0.0297597	-0.0126392	-0.0579045	-0.00295165
Ifitm7	0.6011	-0.267104	0.0811598	-0.280976	-0.29769	0.18424	0.123999	0.0810296	-0.0461564	-0.125453	-0.409264	-0.114923	-0.115985	-0.189966	0.087887	-0.0242134	-0.154574	-0.0573364	0.0078816	0.0837443	0.0998922	-0.0461795	0.0465093	-0.165458	-0.016522	0.0264955	-0.0127809	-0.0531625	0.0316448
Irgm	0.320144	-0.461265	0.23221	-0.278481	-0.448146	-0.391101	0.151711	-0.0266468	0.103978	0.00148581	0.0330636	0.0360252	0.127936	0.054982	-0.0828796	0.0967839	-0.0551237	-0.066521	0.0349516	-0.0879733	0.086462	-0.148813	-0.0784748	-0.158896	-0.00349144	0.147478	-0.131268	0.0548028	0.0864196
Gm129	-0.0696598	0.221609	0.649536	-0.314589	0.281488	-0.114139	0.105569	-0.0398597	0.129638	0.0729436	0.214674	-0.113156	-0.167767	0.165105	0.175816	-0.0773025	0.131199	-0.0166125	0.201495	0.210086	-0.0097108	0.128744	0.104173	0.117238	0.00110927	-0.0275524	0.0501582	0.0090754	-0.00430904
	0.5234	0.149316	-0.134293	-0.585754	0.109017	0.285436	-0.280556	0.152519	-0.15953	0.0552275	0.00674947	0.0787473	0.0401971	0.0870464	0.0586586	0.0483651	0.010123	0.064975	0.0892517	-0.0132688	-0.229672	0.00163643	-0.120311	0.0576965	0.0795512	0.055907	0.00278504	0.0635134	-0.032346
Gstm1	-0.652818	0.170453	-0.290776	-0.452994	-0.0323823	-0.018242	0.115733	-0.113873	0.0498471	-0.221444	-0.240874	-0.136868	0.0271139	-0.14288	-0.0896588	-0.114781	-0.157912	-0.0313923	-0.0233461	0.0138007	0.0224736	0.0957981	0.0530342	-0.119052	0.0318941	-0.0120212	0.0446128	-0.0117912	-0.00471765
Fth1	0.687311	-0.155901	0.231824	-0.172819	-0.378458	-0.18405	0.174934	-0.164795	0.0214806	-0.275377	-0.0876431	-0.0331958	-0.0728886	-0.220258	0.00309825	-0.0205257	0.0143721	0.0017224	0.120384	0.0322488	0.0726431	0.087207	0.0864304	-0.0572732	0.0067903	-0.0606929	0.0450568	-0.0177935	-0.00644081
Csf2rb2	0.490684	-0.548782	-0.0485821	-0.163694	-0.0419384	-0.208181	0.379746	0.116926	0.075112	-0.0736578	0.176147	-0.11919	-0.233367	0.121929	0.109006	-0.00157368	0.165183	-0.0982005	-0.131299	-0.00709771	-0.126732	-0.122515	-0.0129891	-0.0129244	-0.0262021	0.0393797	0.0181115	-0.0070391	0.0134707
Fcgr2b	0.643498	0.144014	-0.0870396	-0.10952	0.283541	-0.435177	0.0684963	-0.169986	0.247676	-0.019433	-0.0854879	0.156007	0.0606026	0.0140093	-0.173854	-0.118154	0.016208	0.0579524	-0.158387	0.148431	0.115039	0.0675843	0.148805	-0.0393389	0.0540346	-0.00847196	0.0380933	0.0631068	-0.0126795
Nfil3	0.178765	0.373784	-0.771364	-0.00782695	-0.177291	0.234499	0.0169675	-0.0384435	0.0388093	0.152704	-0.211474	0.0145088	-0.127926	-0.109757	-0.00220049	0.0287222	0.0922606	-0.0315665	0.130117	0.0920016	-0.0753871	-0.033778	1.6055e-05	0.0108865	-0.00584538	-0.0207784	-0.0552301	0.0265721	-0.00319828
Mmp9	0.567402	0.389435	-0.36297	0.432267	-0.0402726	-0.19258	-0.101937	-0.0727508	0.145128	0.0303332	-0.101816	0.0841284	0.0551646	0.131229	0.0416524	-0.0202815	0.0477052	0.00828678	0.0367184	-0.0334902	0.024153	0.095659	0.0470757	0.0571057	0.0208221	0.13128	0.130125	0.179413	-0.0689163
Myom3	-0.62257	-0.375361	-0.440215	0.0644068	0.133426	-0.102768	0.0652813	-0.0437995	0.214264	0.175977	0.0796174	0.0796302	-0.131463	-0.0453483	-0.0450365	-0.0750145	-0.136696	0.0996665	-0.0105721	0.180539	-0.103802	-0.127357	-0.100239	-0.042135	0.134434	-0.0131241	-0.0629276	0.0106059	0.0042731
Sertad1	0.267373	0.36796	0.642008	-0.00106426	0.322828	-0.172649	-0.118958	0.0361164	-0.152028	0.00219205	0.090701	-0.116739	-0.0112424	0.00872069	-0.0866408	-0.16357	0.0738035	0.0738292	0.00679755	0.192698	-0.0525047	-0.125537	-0.161121	-0.0792174	-0.00579124	-0.0580141	0.043503	-0.0556059	-0.211689
C3	0.507864	-0.435684	-0.292561	0.126469	0.302186	-0.291483	-0.103845	-0.234062	0.000381891	-0.00387851	0.210521	-0.0682494	0.085469	-0.113337	-0.0568825	0.015617	0.174493	-0.00819849	0.125678	-0.101979	0.0876313	-0.126356	0.113862	0.0957723	-0.138826	-0.047398	-0.0168385	-0.0951919	0.0533064
Wdr45	-0.715454	-0.231445	-0.225868	0.461069	-0.268793	0.00914883	0.12413	0.00431968	-0.00476896	-0.171224	0.109063	0.0301672	-0.0645337	0.0206064	0.0625914	-0.0487228	-0.0994084	0.00626715	0.0493869	-0.0289094	0.0819425	-0.0249391	0.00827366	-0.0175267	-0.0779744	-0.00678589	0.0525072	0.00993678	-0.0167889
Creb5	0.319605	0.588623	0.348633	-0.228366	-0.3646	-0.243372	-0.118667	0.225126	0.0922724	0.0156426	0.112972	0.0211198	0.133996	0.121813	0.0509454	-0.114316	-0.0470027	-0.0613672	0.0217157	0.0399404	0.0334677	-0.0289457	-0.0213911	-0.0974121	-0.0107013	0.0729275	-0.0639075	-0.013126	-0.143847
Igfbp6	-0.76439	-0.00339612	-0.119137	0.0719868	0.220837	0.045541	-0.314152	0.000583701	-0.081518	-0.0473124	0.369349	-0.0757056	0.106124	0.0893344	-0.103022	-0.04621	0.110483	0.0558451	-0.0352662	0.0518677	-0.0239802	0.0907044	0.136231	-0.117743	-0.0151717	-0.034246	0.0321481	-0.0279726	-0.00763144
Gm1960	0.640174	-0.311208	-0.214303	-0.232565	0.123415	0.0105345	0.0971753	-0.0147803	0.189026	-0.0874346	0.0316527	0.336104	0.190815	-0.27788	0.215704	0.00502953	0.082547	-0.0699664	-0.0239919	0.0630381	-0.07367	0.0893094	-0.0530198	-0.123502	0.00297599	0.0438981	-0.0182841	-0.00624088	-0.0274237
Tef	0.0200896	-0.124179	0.672326	-0.511148	0.351478	0.0189217	0.0504091	-0.0303957	0.143853	-0.142662	0.0243224	0.0953023	-0.00136835	0.0346405	0.146083	-0.138127	0.0288029	0.0536759	0.0923198	-0.062071	0.141632	0.044674	-0.0506444	-0.0917573	-0.0290595	-0.00865031	0.0324094	0.00436456	0.00806676
	-0.689173	0.377171	-0.00233738	0.353905	-0.171154	-0.0539634	-0.0615249	0.0602611	-0.0146224	-0.317623	-0.207429	-0.171601	0.0755801	0.0216189	0.0367653	-0.0125836	-0.127449	0.0730747	0.0350893	0.0464665	-0.0633863	-0.0187986	-0.00168766	0.0487799	-0.00375552	0.0353781	0.0523739	0.00392064	0.0298828
Dcamkl1	0.787165	-0.029916	0.0271886	0.2773	0.160347	-0.200378	-0.268174	0.0326149	0.222555	0.0422514	-0.0895336	0.0106558	0.0537546	-0.0817383	-0.0325714	0.0754503	0.116194	-0.011251	0.0110981	-0.0642235	-0.0853968	0.0719138	0.0960114	-0.172696	-0.117226	-0.0621163	0.0127237	0.001789	0.00900092
Rab6b	-0.592947	0.151225	-0.2677	-0.190626	-0.206294	0.00215785	0.113647	-0.313713	0.381191	-0.20918	0.215143	0.090733	0.0558242	-0.108122	0.117047	-0.102253	0.153328	0.0123406	-0.0839347	0.0385694	0.052333	-0.0231587	-0.0579093	0.172536	-0.0622067	0.0586992	0.0409731	-0.0382736	-0.0453441
Bmper	0.567108	-0.109036	0.597715	0.103244	-0.0909794	0.0911486	-0.0682697	-0.224885	-0.0311738	-0.11766	0.0164166	0.0635156	0.105811	-0.309893	-0.0409493	0.0501544	-0.19006	0.0663643	-0.147436	-0.0661731	-0.141563	0.0118322	0.080603	0.0122918	0.00301352	0.039162	0.00961474	0.0185012	-0.0277182
Plac8	0.114849	-0.607791	0.281776	0.0223167	-0.409776	0.0321721	0.0843247	0.0562332	0.127219	-0.26717	0.17008	-0.158956	-0.0904849	0.157663	-0.143088	-0.0878152	-0.159175	-0.00101312	0.116393	0.119341	-0.148179	-0.0369699	0.0959711	0.0285937	-0.0121757	0.183705	-0.155036	0.0456449	0.0937884
Ppa1	0.754517	0.390115	-0.34681	-0.115554	0.0788916	0.0228354	0.122364	0.0041745	0.0632865	0.0060483	-0.115448	-0.114979	0.191199	0.140731	0.0863027	0.0691509	-0.0155042	0.0240406	0.0943971	0.0159655	0.0292148	0.0661083	-0.0570929	0.00519643	0.0638512	0.0311502	0.00535109	-0.0191939	0.00524754
	0.516254	0.55194	-0.119258	0.195497	0.335347	-0.0845666	0.0821052	0.218553	-0.0582408	-0.244674	0.0067713	0.104114	0.0988852	0.0548979	-0.0652839	-0.0650097	0.116514	0.0186751	0.163752	0.039428	0.0366989	-0.122059	0.136176	0.0427457	-0.140086	-0.0457844	0.0477083	-0.0504308	0.0375969
Tfrc	0.548031	-0.124778	-0.225856	-0.560603	-0.142867	0.391425	-0.0441894	-0.108736	0.258439	0.033854	-0.057774	0.0936834	0.0944035	0.0505046	-0.0574182	-0.0620133	0.096703	0.0633226	0.0687464	-0.00313962	0.0502313	-0.00647089	0.001891	-0.0618226	0.00610284	0.0765685	0.0203992	0.0387391	0.0210925
Slc16a11	-0.690361	-0.05837	-0.226425	-0.535482	-0.101177	-0.0581861	-0.261903	-0.119477	-0.0207312	-0.00153804	-0.153925	0.0540162	0.0373559	0.0649178	0.118589	0.0889632	-0.0825409	-0.0560369	0.00287129	-0.0845942	0.0376964	0.0725988	0.0451736	0.0167444	0.0317884	0.041248	0.0304433	0.00626103	-0.0325148
Gpr97	0.300813	-0.15465	0.392253	-0.297884	-0.320724	0.225067	0.230664	-0.297389	0.126677	0.0514348	-0.0725553	0.0357048	0.115757	0.146658	-0.122648	0.241372	-0.347843	0.123721	0.145614	0.138666	0.0610138	-0.136538	0.0260283	0.0336562	-0.0662937	0.0458905	0.00744611	-0.0782012	-0.0284365
Mgl2	0.524182	0.200543	-0.129841	0.415772	0.0211938	0.0545197	-0.0359491	-0.349315	0.208859	-0.299864	0.186959	0.0156046	0.109709	0.100041	-0.000229456	-0.126889	0.0129587	0.159903	-0.123884	-0.0157906	0.250525	0.167502	0.138791	0.0473502	0.0617882	-0.0336059	0.022358	-0.0470267	0.0188859
Ctps	0.770845	0.221039	0.176336	-0.252054	-0.268461	-0.210834	-0.120152	-0.140894	-0.0995375	0.14833	-0.031294	0.0479805	-0.0405039	-0.0393554	0.0685245	0.0831813	0.0847154	0.165031	-0.113476	0.00259501	-0.0939541	0.00528695	0.028714	0.0508563	0.0221221	0.0346813	-0.00681604	0.0111041	-0.00924261
	0.792213	-0.0152986	0.0366448	-0.0552321	0.264511	-0.0800471	0.0121779	0.0107343	0.166453	0.153165	-0.163834	0.0857663	0.0991063	-0.380382	-0.0724104	0.0269089	0.068125	0.0386219	-0.00654352	0.00137041	-0.0994484	0.0852949	-0.0403071	-0.0731352	-0.085325	0.0632207	-0.00608557	0.020182	-0.057034
Tnfrsf4	0.229532	-0.584884	-0.175623	-0.347925	0.123181	-0.258203	0.210353	0.0720361	0.248239	0.0140753	0.00804465	0.065558	-0.143858	0.212717	0.0951237	-0.139285	0.175562	-0.112974	-0.104923	-0.00887976	-0.119459	-0.0207186	0.0187834	-0.0175725	0.0262155	-0.0607477	0.0502834	-0.108321	-0.269816
Itpka	-0.639277	-0.0571314	-0.41658	-0.385276	-0.135723	-0.0450779	-0.23818	0.104728	-0.0394044	0.161471	0.0981328	0.0224024	0.105281	0.205762	0.0797716	0.0900744	0.0570768	0.0894347	-0.112408	-0.0891854	0.0475402	0.0433499	0.114813	-0.140222	0.0374461	0.00522656	0.0377301	-0.019399	0.0147285
Myh7	-0.712907	-0.0615129	-0.0275115	0.331034	-0.0157093	-0.191363	0.0763964	-0.218805	0.153345	0.031535	0.308006	-0.125724	0.105582	-0.00723347	0.0154211	-0.060999	0.216713	0.023987	-0.131755	-0.0191045	-0.0884877	-0.10402	0.14844	-0.148851	-0.0578055	-0.052302	0.0413208	0.0284846	0.00417206
Gimap5	-0.212895	-0.712972	0.343733	0.220779	0.0587001	0.193279	0.227643	-0.0292023	0.178286	0.0723274	-0.0929967	-0.0675937	0.081884	0.0530205	-0.0547535	0.0225294	-0.15442	-0.0397276	-0.170315	-0.0814463	-0.0425827	-0.0511579	0.0507386	0.0677236	0.0602008	-0.0837883	0.180241	-0.0628492	-0.0545967
Emilin2	0.682049	0.348422	-0.119927	0.207945	0.276125	-0.0588327	0.120414	0.361561	0.171858	-0.218869	0.0639807	0.0622648	0.0138003	-0.0198106	-0.0415886	-0.0639487	-0.0778797	-0.0427583	0.0878107	0.0301947	-0.0113406	0.0827177	-0.00848651	-0.0191996	0.0883992	-0.0713515	-0.0235132	0.035097	0.0206553
Eif2ak2	0.363371	-0.707666	0.0724929	-0.0437344	-0.374039	-0.0695121	-0.0239594	0.157358	-0.233841	-0.0314322	-0.188722	0.064947	0.245363	-0.0750644	0.0603291	-0.0113184	0.0310425	0.067409	0.105752	-0.0413729	0.0284849	0.00382273	-0.0184558	-0.00753659	-0.0694444	-0.00107142	-0.0147414	-0.000852483	0.0123815
Bcl2a1c	0.408716	-0.581899	-0.224946	-0.389897	-0.322228	0.0425962	-0.112898	0.118927	0.263289	-0.000758287	0.126818	0.0692124	0.129681	0.0121552	-0.140606	-0.0241384	-0.0508296	0.0290563	-0.0603547	0.0224607	-0.0793328	0.0117291	0.0604468	0.0551729	-0.0760353	0.0610876	0.0320683	0.00108641	-0.0207372
D630002J15Rik	0.325405	0.414432	-0.295243	0.0325319	-0.127152	0.227735	0.239857	-0.305521	0.327551	0.0674673	0.317056	0.133149	0.0696118	0.0489684	-0.0644826	0.131341	-0.0850477	0.0614477	0.112745	0.056345	-0.218881	0.139396	-0.147119	0.0358155	-0.00352154	-0.0951901	-0.0998279	-0.127219	-0.0639809
Arg1	0.575973	0.0639714	0.126247	0.0417674	-0.193193	0.24614	0.369204	0.0419387	0.313817	-0.046422	0.416111	0.0995194	0.0216673	-0.0145553	0.0898459	0.140595	-0.180273	-0.0164521	0.110051	0.180384	0.0745317	-0.074999	0.042334	-0.0130231	0.0194385	0.0584457	0.0405649	-0.0324308	-0.0352253
Rgs2	-0.58088	-0.438846	-0.140148	-0.0572108	-0.0766893	0.0098482	-0.110397	0.179935	0.165542	-0.25299	-0.18313	0.30475	0.230621	-0.00809985	0.00430004	0.150227	0.0137108	0.0480538	-0.0497441	0.0690857	0.1535	-0.0664116	-0.126704	0.200798	0.00648496	0.0432416	-0.055572	0.0490372	-0.0372219
Tnfsf14	0.741146	0.0404803	-0.138048	0.183742	-0.222624	-0.102147	0.0301829	-0.0313608	0.0326341	-0.0669862	-0.254377	0.103768	0.000502596	0.414522	-0.188076	-0.0272019	0.136943	-0.0458043	-0.0176238	-0.108314	-0.0212513	0.001674	0.0558578	0.0534472	-0.0545174	-0.0205147	0.027887	0.0402394	0.0164608
1200009O22Rik	-0.58346	-0.279867	-0.292037	0.207794	-0.0532504	0.305578	0.39724	-0.000149274	0.0900412	-0.0621844	-0.0177894	0.206005	0.103017	-0.0275393	0.0715914	-0.150848	-0.174369	0.089464	0.0536877	0.0128603	-0.0052212	0.119088	0.159004	0.0621572	-0.138004	-0.0219969	-0.00687738	0.0169543	-0.0108385
Cyp2s1	-0.629509	0.0161376	-0.46453	-0.426451	0.0570491	0.0657843	-0.0504675	0.0938483	-0.0583859	0.218309	0.0858988	0.0316368	0.0524278	0.191224	0.084121	0.0498435	-0.0439557	0.0581268	-0.104985	-0.0915338	0.0248727	0.00348763	0.109792	-0.190816	0.0619562	0.0147417	0.0143274	-0.0204333	-0.00805851
Dok2	0.653418	-0.160458	-0.258834	-0.25623	-0.044725	0.202111	0.19943	0.0570312	0.375609	-0.0934552	0.0567216	0.192648	0.018613	-0.0735049	0.198178	-0.032267	0.102799	-0.190527	-0.0275528	-0.0037901	0.106741	-0.0467359	-0.129	0.111152	0.0347248	0.0197393	-0.0229508	-0.013407	0.0067494
Egr2	0.471162	-0.356986	0.214154	-0.0663306	-0.365059	-0.220871	-0.118625	0.0798721	0.132689	0.1284	0.0592771	0.16546	0.0809433	-0.307952	0.0498644	0.178104	-0.0151164	0.248385	0.184914	-0.0227985	0.23044	0.182907	-0.0867709	0.0425273	-0.0196663	-0.0195625	0.0191971	-0.0514463	-0.0301266
AW112010	0.405601	-0.300448	0.0450648	-0.35233	-0.573672	0.1893	-0.10197	-0.270367	-0.0932103	-0.153958	-0.237906	-0.0333531	0.0823318	0.0283284	0.058811	0.120585	0.130927	-0.0356752	0.158504	-0.0713305	0.0526253	0.0207146	0.0181251	0.0280697	0.00999358	-0.0180359	0.0296265	-0.0224224	0.0138083
Mcam	0.616512	0.410687	0.153522	0.0676886	-0.509548	0.127459	-0.0204025	0.160061	0.109385	-0.0105743	-0.0303041	-0.0413092	-0.0104991	0.0254552	-0.125201	-0.0585115	0.0843926	0.179305	0.113426	-0.0788542	0.0972381	0.0866688	0.0352994	0.0372406	-0.0228735	-0.0821487	0.00523329	-0.036055	0.00805112
Pfkfb3	0.0135337	0.151546	0.801302	-0.265001	0.308114	-0.0135771	0.108443	-0.0297656	-0.0334367	-0.0816547	-0.0196111	-0.0961888	-0.0902318	0.203926	0.0804586	-0.0389622	0.0622639	0.0667814	0.0821684	-0.136766	-0.135964	0.0628274	0.050496	0.119019	-0.0632939	0.0463207	0.0306618	0.026487	0.0299908
Efemp2	0.442595	-0.354994	0.447497	0.187626	0.0875902	0.00289497	-0.347563	-0.162859	0.0485079	0.0201765	0.244525	0.0382336	-0.0746677	-0.0926559	0.319176	0.069315	0.170484	-0.128267	-0.121072	0.156744	-0.0813958	-0.0646024	-0.00929292	0.0550443	0.0484979	-0.00270005	-0.035258	-0.0224972	-0.00284981
1110021J02Rik	0.384181	-0.075567	-0.185171	0.413982	0.0483247	0.354544	-0.38932	-0.266115	0.23406	0.02839	0.142667	-0.144116	0.230156	0.204339	0.0906338	-0.0704584	0.083104	-0.118768	0.132128	0.0821615	0.161358	0.0497652	-0.0227896	0.083545	-0.0531844	-0.0330792	-0.022249	0.0179	0.00340774
Fignl1	0.610899	-0.0897524	0.219625	0.0834925	-0.234795	0.35982	-0.374392	0.0965044	0.0685964	0.19414	-0.0404173	-0.130135	-0.150779	-0.0988406	0.197178	0.0823157	0.0844837	0.13292	-0.039677	0.121142	-0.129241	-0.0348684	0.0452278	-0.166314	0.0121587	0.0377461	-0.00582669	0.00690581	-0.00131153
Slc23a3	0.484288	-0.494816	0.280081	-0.00274285	0.522207	0.0134784	-0.0280512	-0.084898	-0.191179	-0.00472313	0.0678714	0.122242	0.0735944	0.179813	-0.0285373	0.135027	-0.0181176	-0.0574802	0.10301	0.146135	0.0105789	0.0145443	-0.0436834	0.0114829	0.0900639	0.00129954	-0.045948	0.000118455	0.0137651
Bmf	-0.583108	-0.467391	-0.432067	0.0140173	0.173904	-0.118707	0.0790633	-0.0612567	0.0171079	-0.0111886	-0.211554	0.147158	-0.178415	-0.0664865	0.00564602	-0.116911	-0.0279342	0.0484325	0.0152734	-0.228116	0.0451056	-0.0230679	-0.0298852	-0.0635068	0.122607	-0.0328989	-0.0504259	0.0388349	0.021913
Orm3	0.120528	0.176273	-0.00327833	-0.450129	-0.037426	0.186139	-0.0709331	0.0436648	-0.350473	-0.297298	0.322256	-0.113319	-0.286906	0.090547	-0.045432	0.0872313	-0.0471122	-0.112794	0.0799758	0.0765484	-0.121411	0.132219	0.0218505	0.0481509	0.15687	-0.337802	-0.217358	0.160984	-0.0812207
Ifitm3	0.633338	-0.458623	0.0352063	-0.14677	-0.389821	-0.112484	0.14038	-0.00749303	-0.114059	-0.156591	-0.244083	-0.0993389	0.0274558	-0.0566639	0.084399	-0.0110602	0.153387	-0.0429953	-0.137811	0.0597089	-0.00355953	-0.0358466	0.0519404	-0.0831209	0.0268568	0.0158227	0.00585051	-0.0495187	0.0301747
Ung	0.425015	-0.316201	-0.168937	0.274711	0.199348	0.401709	-0.156345	0.0935865	0.338252	-0.121977	0.0871863	0.221796	-0.0517849	0.119051	0.137151	0.041352	-0.107966	0.123629	0.127065	0.20386	-0.0357469	0.00562751	0.0732561	-0.253933	0.0115776	-0.00589016	0.0025908	-0.040216	-0.00134664
Fhl1	-0.610087	0.0288858	0.107037	-0.400064	-0.00427687	-0.148479	0.412527	-0.279722	-0.259741	-0.0261115	0.204092	0.0533884	-0.0198798	0.0551389	0.0212365	0.0938787	-0.0854156	0.161129	0.00959187	0.0394552	-0.00673003	-0.0676053	0.00138382	-0.00885307	0.114872	0.0528627	0.0144106	-0.0598885	-0.0150395
Mlkl	0.369402	-0.561346	0.180099	-0.177262	-0.196356	0.00194904	-0.199065	0.245367	-0.462513	-0.0827235	-0.0432269	0.0801907	0.21277	0.000910744	0.164301	0.0513662	-0.0467893	0.0265059	0.0797853	0.0309647	0.0270643	0.0657162	-0.0389196	0.0534307	0.127138	-0.0222946	-0.0631407	0.0114243	0.0424557
Hist1h1c	-0.765195	-0.00596494	-0.402886	0.0893205	-0.0866515	-0.202015	0.185947	0.0911317	-0.0212714	0.224324	0.0340445	-0.0198957	-0.0237852	0.00901783	-0.0394353	-0.0674011	-0.0368577	-0.108057	-0.0703156	0.0838585	0.0569223	-0.136352	-0.140708	0.130736	-0.0820622	0.054872	0.0112956	0.0119873	-0.0110592
Chaf1b	0.27518	-0.659761	-0.0297417	0.36535	0.0365617	0.0662257	-0.210112	-0.202807	0.00859565	0.0706877	0.224115	-0.376409	0.00677392	-0.0853683	0.0862769	-0.00145465	0.0550385	0.115627	0.0381439	0.102388	-0.0132577	0.00718319	-0.11079	0.0880954	-0.0339611	0.018697	-0.0133652	-0.00377813	-0.0396102
Hes2	-0.767305	-0.22739	0.130378	0.366047	-0.0761804	0.0889443	0.0618894	0.269421	0.0572023	-0.186033	0.0560472	-0.0175403	0.0458383	0.0054891	-0.0748993	0.128259	0.0643396	-0.134346	0.0300095	-0.0258982	0.098888	-0.0461914	0.0652359	0.00477704	0.0202636	-0.0958821	-0.0551955	-0.00658272	-0.0158286
Gm905	-0.00255231	-0.254525	-0.821459	0.233367	-0.204585	0.11269	-0.0500402	0.0463028	-0.0801205	0.0802826	0.0483201	0.162817	0.0330855	-0.170553	0.0584769	0.108064	0.134437	-0.01156	0.117378	0.0199451	0.0823709	0.106387	0.0145525	0.0308514	-0.0041609	-0.0451063	-0.064464	-0.0335423	-0.0279727
Pprc1	0.439954	0.351815	0.351396	-0.418006	-0.21296	-0.318948	-0.12671	0.0858108	-0.0560651	0.0686155	0.016955	-0.047745	0.146526	0.0760977	0.0594657	0.129211	-0.084987	0.077792	-0.11879	0.119187	-0.131698	0.0334347	0.083792	0.0545457	-0.128973	0.212972	-0.139119	0.0402115	0.0551179
Mdk	0.636311	-0.113535	0.478126	0.164028	0.0275076	-0.312132	-0.222158	-0.071479	-0.161774	0.0702872	-0.223249	0.0577946	-0.124573	-0.144387	0.0525934	0.0669279	-0.00048753	-0.126444	-0.0473149	-0.0587041	-0.122527	0.0176255	0.0228517	0.00930643	-0.0677236	-0.0321667	-0.024166	0.0399438	0.0274427
Gstm1	-0.484588	0.454796	-0.310594	-0.201762	0.00758868	0.27854	0.0659456	0.0798984	0.0857379	-0.045775	-0.340493	-0.223384	0.0852461	-0.132222	-0.140094	-0.08693	-0.0564011	-0.240053	0.080509	-0.131705	-0.0119159	0.0653573	-0.00662557	-0.0997922	-0.0658	0.00412905	0.0342665	0.0303595	0.00869448
Ccl20	0.403097	-0.344353	-0.208145	-0.480075	-0.367461	0.245483	0.260399	0.0734819	-0.16781	0.166524	0.0773538	-0.109867	0.0398416	0.0911026	-0.0906675	0.0337842	0.213422	0.15455	-0.0701098	-0.0439282	0.0529298	-0.027511	-0.0112524	-0.0144489	0.0124832	0.0458025	-0.015202	0.0208795	0.0187718
H2-Oa	-0.710613	-0.54863	-0.0818299	0.133865	0.0696555	-0.046682	-0.0518245	-0.130501	0.164288	-0.170212	0.0363822	-0.0578507	-0.0254907	-0.123341	-0.152889	-0.127323	-0.000730156	0.00530722	0.0326938	-0.0107325	-0.0200387	0.0110154	0.0464916	-0.0147576	-0.122338	0.0488225	0.0371398	0.0512806	-0.0333768
Nrn1	-0.542899	-0.203967	0.166677	-0.0643082	-0.381146	0.138902	0.134534	0.371651	0.115203	-0.0619531	0.024943	-0.139361	0.0957092	-0.0345653	-0.0590868	0.144305	0.120972	-0.276614	-0.0101396	-0.193723	0.141353	0.208211	-0.0738751	-0.123805	0.0418069	-0.0523537	0.0518008	0.137307	-0.0142609
Sorcs2	0.384475	-0.698433	0.17267	0.142806	0.132108	0.225924	-0.371006	-0.14064	-0.14835	-0.00940206	-0.0125957	0.116866	-0.0323962	0.113178	-0.0456399	-0.0615231	0.063726	-0.0475474	0.0298895	0.122577	-0.0332849	0.0353917	-0.00653403	0.0562982	-0.0511381	-0.00374183	-0.0404081	0.0225408	0.00442452
Tjp3	0.187313	-0.398357	-0.715363	0.0154647	0.018568	0.157235	0.0568273	-0.00809484	0.0390243	0.0883041	0.0686056	-0.0729273	-0.243772	0.179849	0.0316303	0.0919475	0.0043339	-0.0241658	0.0583975	-0.00431046	-0.0618912	0.102043	0.0161684	-0.207303	0.00424574	-0.103883	0.0284543	0.260374	-0.0662161
Itga7	0.322778	-0.117009	-0.538924	0.0247054	0.306616	0.12944	-0.0873185	0.144215	-0.209966	-0.0407323	0.142036	-0.203893	0.3214	0.383697	-0.0255311	-0.0538746	-0.0398602	0.0393216	0.158476	0.0337473	-0.0187871	0.15424	0.0496058	-0.171513	0.0628611	0.000280421	0.00142089	-0.0301528	-0.00666676
Rasl11a	-0.101168	0.156389	-0.566338	0.212219	-0.396341	0.0415421	-0.109432	0.0480577	-0.416724	0.215997	0.105402	0.0360521	0.0962076	-0.102985	0.0118802	0.0878663	-0.0307759	-0.051317	-0.173078	0.249717	0.0695122	0.0543357	0.155126	0.0192301	-0.181761	0.0196321	-0.00887238	-0.041242	-0.0517072
Serpina3c	0.0639014	-0.00251106	-0.0379305	0.0621806	-0.123124	-0.231165	0.158143	-0.00301229	-0.454522	-0.543311	-0.0575168	-0.110747	0.138491	-0.0215121	-0.225899	0.138552	0.249475	-0.0820041	-0.119064	0.241992	-0.14941	0.289655	-0.0151215	-0.00426597	-0.108143	-0.109655	-0.0957979	-0.0928828	-0.00877368
	0.204874	-0.776197	0.389177	0.28652	-0.0773235	0.158649	-0.114339	-0.0127303	-0.0510617	-0.0603634	-0.0482661	-0.0852931	0.0587621	0.0680402	-0.0730963	0.0870796	0.113555	-0.0211061	0.0820536	0.0830528	0.0031271	-0.0298563	-0.0550621	0.0698727	-0.066776	0.0173257	0.00802212	-0.00926018	0.00704234
Gtl2	0.0797859	-0.285637	0.231571	-0.150849	0.308734	0.193346	0.24788	0.175051	0.0681485	-0.015652	0.21164	-0.290555	-0.0101907	0.138252	-0.130882	0.480228	-0.176385	0.0956405	-0.182148	0.0512483	0.0662832	-0.0125796	0.0479461	0.0971837	-0.268834	-0.120134	-0.106624	0.0878769	-0.10796
Gins1	0.485704	-0.431015	-0.0594644	-0.0624902	0.028897	0.0252708	-0.586236	0.0882649	-0.000844171	-0.104496	0.163576	0.306583	-0.114582	-0.037478	0.147557	-0.0791292	-0.0607868	-0.0225102	-0.00781167	0.0515459	-0.0122815	0.163293	0.0350652	0.0577914	-0.0440555	-0.0309533	0.0109563	0.0412421	0.0260091
Mcm6	0.554721	-0.616925	0.195199	0.229465	0.170069	-0.101191	-0.0268803	-0.265908	0.118061	-0.0727555	0.00215594	0.113658	0.0837462	0.0777882	-0.122455	0.0976048	0.14876	0.00390079	0.0956017	0.0542007	0.00855501	0.0200528	-0.0104629	0.0573888	-0.04935	0.00410145	0.00171786	-0.000286261	0.0064712
Rgs11	-0.251626	-0.624851	0.413348	-0.0253116	0.0215709	0.246804	0.279685	0.0673489	0.179157	0.241562	-0.112175	-0.0344983	0.242091	-0.0134267	0.0803127	-0.0479989	-0.15008	0.0381332	-0.0859168	-0.0691776	-0.0511811	0.0139748	0.117318	0.0643129	0.0222641	0.0217008	-0.014308	-0.0223756	0.0177533
Pcolce2	-0.705939	0.0868296	0.23775	0.148386	-0.230621	0.217933	-0.0715484	0.13287	-0.270467	-0.03373	-0.0619501	0.0234778	0.16741	-0.0801983	-0.130042	-0.00484284	0.134274	-0.0604531	-0.166042	0.217941	0.155481	0.0146058	0.115572	-0.0420629	0.0654481	-0.133216	-0.0543444	0.0207787	0.018981
F10	0.461563	-0.102252	-0.134978	-0.533969	0.0893637	0.270859	-0.242055	-0.117905	0.052225	0.0446357	0.208506	0.213081	-0.32433	0.262288	-0.0422196	-0.136613	-0.00779558	-0.082033	-0.111904	0.0218419	-0.0494649	0.0467679	0.0563231	0.033002	0.0273866	-0.0376214	-0.00840424	-0.010614	0.0160283
6330505F04Rik	-0.26251	-0.625373	0.341876	-0.18131	-0.103068	0.262282	0.309484	-0.00695071	0.227732	0.204488	-0.109354	-0.0996931	0.0440946	0.0621157	0.0517995	0.0723483	-0.091284	0.00934847	-0.114514	-0.072747	-0.0797959	0.00986608	0.0515516	0.0309218	-0.0285283	-0.162478	-0.123849	0.0781933	-0.0116957
Bhlhb2	0.445401	-0.162653	0.318266	-0.350249	0.276816	-0.165827	-0.379528	-0.00716088	0.162266	-0.107678	0.171851	0.0520679	-0.097179	0.0441182	0.0400845	0.215325	0.0998019	-0.108748	-0.10944	-0.240571	0.238034	0.00112605	-0.0689018	-0.0537585	0.130108	0.0111991	-0.00537645	-0.0201429	0.00463935
Tmprss4	0.0846786	-0.521141	-0.268973	-0.096876	0.0197884	0.282557	0.130549	-0.493861	-0.119726	-0.00325603	-0.122075	0.0495308	0.25407	0.102856	-0.0229324	-0.126757	-0.0573708	0.206267	0.0383637	0.148203	-0.0837464	0.0331151	-0.145622	-0.0482045	-0.0228906	-0.173953	-0.160881	0.125119	-0.0409823
Card11	-0.726455	-0.433816	-0.0690721	0.148057	-0.186925	-0.263167	0.0754577	-0.0725443	0.0169266	-0.110948	0.0885103	-0.0451977	-0.0949681	-0.0655088	-0.0269126	-0.142811	-0.0855173	0.040869	0.151164	0.17767	-0.0960466	-0.0433678	-0.0504403	-0.000606115	-0.0832346	-0.00375473	0.031146	0.0188142	0.000911613
Cstb	0.588046	-0.400146	-0.377993	0.062278	0.261148	-0.235827	0.11142	-0.103258	0.0109642	-0.0646259	-0.0291385	-0.112442	0.0265493	-0.0146497	0.0736338	-0.291199	-0.034708	-0.00680729	-0.237652	0.126137	-0.0564409	0.0517344	-0.0113225	-0.0952465	0.0305797	0.0223133	0.0142639	-0.0303521	0.015845
6720401G13Rik	-0.120961	-0.351149	0.17242	-0.139183	0.0586276	0.145597	0.264553	0.146901	-0.00602086	0.584592	-0.0926125	-0.117313	0.30308	-0.0171104	0.0163067	-0.164986	0.272778	0.0479891	0.00363591	-0.0392804	-0.035108	0.0781328	0.0571035	0.123769	0.0115768	-0.232462	0.219095	-0.0588033	-0.0563965
Ung2	0.386226	-0.0166235	0.00777807	-0.326618	0.157455	0.499279	-0.331524	-0.193228	0.0497989	0.282632	-0.00307514	0.110449	-0.0983491	-0.0298375	0.0101112	-0.0197861	0.151268	0.0926815	0.0811816	0.0408693	-0.192204	-0.335698	0.0415723	0.113766	-0.0185181	0.0406064	-0.0776584	-0.0610085	0.0329807
3300001A09Rik	-0.20507	-0.538565	-0.2506	0.132818	-0.278079	-0.188157	-0.152312	0.0687709	-0.0398269	-0.0477994	0.0835914	0.0454382	-0.156112	-0.139754	-0.131385	0.168768	0.172317	0.0588527	-0.152999	-0.0404391	0.00785119	0.0322595	-0.362006	-0.14665	0.0549067	-0.240066	-0.217861	-0.15561	-0.00643024
Fcgr2b	0.587725	-0.17376	0.0731355	-0.262451	0.027701	-0.390775	0.300005	-0.0199169	0.290736	-0.0209615	0.206643	-0.0177864	-0.321695	-0.0144857	0.132941	0.2054	-0.017941	-0.016797	0.0715003	-0.0529915	0.0514887	-0.0325726	0.015459	0.0040946	-0.0230291	0.00724359	0.0167414	-0.0178233	-0.0326775
2410014A08Rik	0.77033	0.253439	0.0853026	0.329543	0.0460934	-0.0727461	0.0356406	0.20078	-0.0799412	0.120048	-0.000734471	0.220556	-0.181455	0.0104122	0.186991	0.00892419	-0.140797	-0.0480895	-0.106108	-0.0142132	-0.00449473	-0.0224323	0.0090631	-0.0303727	0.0178914	-0.0360325	-0.0363245	0.0231556	0.0368832
Sod2	0.59536	0.0153668	-0.274163	-0.500272	-0.110004	0.275732	-0.0657756	-0.0649914	0.16736	-0.00632083	-0.272724	-0.024682	0.0074417	-0.0481856	-0.121508	-0.0921068	0.0647167	0.0601891	-0.118509	0.198913	0.0698228	0.0922921	0.0822042	-0.104966	0.0144501	0.0277349	-0.00356066	-0.0307811	0.00171231
Abcg1	-0.609148	-0.380107	0.194577	0.154177	-0.0601944	-0.303301	-0.0664532	-0.209554	-0.13002	0.18084	0.181242	0.0169719	-0.211804	-0.140451	-0.133154	-0.0988361	-0.119383	0.0160736	0.203192	0.143644	-0.00593566	0.000974669	-0.050979	0.0358503	-0.134969	-0.0477713	0.0447298	-0.0313267	0.0148288
Dleu8	0.103769	-0.456564	0.286461	0.106656	0.214482	0.172244	-0.372432	-0.0444408	0.497594	-0.134603	0.0253461	-0.0128701	0.0309457	-0.0839601	0.0764392	-0.0284753	0.0895431	0.0959936	-0.0801129	-0.0931192	0.0971721	0.0948215	0.115208	0.0543337	-0.0534694	0.169852	-0.270237	0.114587	0.0704404
Ctsk	0.513709	-0.50592	-0.0188646	-0.105072	0.392881	-0.0272314	-0.131813	0.0511532	-0.106612	0.313286	0.155157	0.174652	-0.161178	-0.0402718	-0.218378	-0.00990242	0.0157551	-0.0119549	-0.0138022	0.0430712	0.111266	0.168374	0.0125854	0.034847	-0.0713334	-0.0522812	-0.0262056	0.0330899	-0.00651164
Igfbp3	-0.597534	0.104564	0.4381	0.317278	-0.0808252	-0.00111536	-0.0774917	0.183717	-0.12715	0.117723	0.109467	0.0862402	0.0714287	0.248049	-0.255214	0.148481	-0.0196982	0.0190643	0.00946758	-0.1003	-0.015404	0.166294	-0.153298	0.0499298	0.0234205	-0.0194508	0.00794227	0.148797	-0.0442587
5830416P10Rik	0.351151	-0.435943	0.0458286	0.594065	-0.252757	0.047928	0.148791	-0.00174075	0.0434751	-0.195008	-0.0104175	0.151173	0.076617	0.28499	0.206553	0.0550474	0.129254	-0.116537	-0.00123747	0.0820186	0.0206498	-0.0643951	-0.0531381	0.0182958	-0.00971313	0.0202664	-0.00405019	-0.0487409	-0.000341952
Ltc4s	-0.770875	0.0182067	0.149413	0.00415694	0.26226	-0.154669	0.250094	0.0746378	0.073705	-0.0942488	0.213369	-0.10134	0.0808949	-0.0724933	-0.157093	0.061601	0.200298	-0.0385066	-0.134702	0.126024	-0.109722	-0.125462	0.0388141	-0.000437224	0.0763888	-0.00522845	-0.0171407	0.0239871	-0.0150721
Efemp1	-0.587163	0.0929293	0.240526	0.268646	0.162248	-0.273766	-0.0385632	-0.203645	-0.333016	-0.00189828	0.254814	-0.0466251	0.106586	0.110401	-0.0497898	0.189361	0.0677238	0.1034	0.113516	-0.165505	-0.238817	-0.0360715	0.0840012	-0.0771251	-0.00558759	0.0341534	0.0616966	-0.0047175	0.0231519
Akr1c19	0.276116	-0.64899	0.352606	-0.0914974	-0.103128	-0.126798	-0.0717363	-0.0485307	-0.231334	0.178569	-0.0269755	0.106553	0.17264	-0.093252	0.206478	-0.131983	0.20462	-0.169044	-0.0248159	-0.0429194	-0.0655748	-0.00214345	0.0485149	-0.00842618	0.0163626	-0.0731951	0.024211	-0.054555	-0.225383
Serpind1	0.302004	0.0314388	-0.168544	-0.536149	-0.251335	0.00707063	0.377407	-0.265555	-0.0126517	-0.0736455	0.0830976	0.0522497	0.0142983	-0.104616	0.178246	0.220163	0.214621	-0.0600284	-0.154608	0.0738213	-0.16446	0.0344386	-0.0389907	-0.0310104	-0.0566873	-0.235215	-0.14481	0.128276	-0.0588113
Csf2rb1	0.613886	-0.33621	-0.0367625	-0.195528	0.0825669	-0.175505	0.329932	0.0309026	0.174193	-0.149776	0.297136	0.105026	-0.220313	0.095294	-0.225334	-0.144655	0.100311	0.0156571	0.117432	-0.0378048	-0.0272904	0.0880098	0.0417794	-0.000238119	-0.0142201	-0.0327472	0.053816	-0.036832	0.0197144
Nnmt	0.483985	-0.0683575	0.301121	0.359579	0.282516	-0.095789	-0.0705607	0.268528	-0.0302083	-0.186669	0.0137118	-0.268278	0.185006	0.0686139	0.0148562	0.275494	0.152207	0.241237	-0.15053	0.00625402	0.00993846	-0.00979159	0.0831	-0.07404	-0.156053	0.0949004	0.0306747	-0.0089846	-0.0323084
	0.525639	-0.415352	-0.110563	-0.210081	0.0450756	-0.026727	0.299193	0.108319	0.193996	-0.248349	0.27502	0.0573383	-0.202345	0.087743	-0.139532	-0.253438	0.178498	-0.103824	0.00628045	0.00356275	-0.168004	0.0434871	0.0366133	-0.0335675	0.00969869	-0.0125123	0.0442428	-0.0358431	0.0385317
2210011C24Rik	-0.65368	-0.349624	0.224719	0.346643	-0.0309966	-0.0901774	0.0171327	-0.202762	-0.0901239	-0.0554809	0.262845	0.0118164	-0.060558	-0.0533892	0.167916	-0.0731013	0.059421	-0.112584	-0.0643228	-0.0265186	-0.106905	-0.0427189	0.117304	-0.216981	-0.0750303	-0.0598401	0.0619631	-0.0147139	0.0203448
Ifi203	-0.130383	-0.61764	0.19123	0.0660969	-0.0343349	-0.346178	0.453804	0.111422	0.0786193	0.0478744	-0.191296	0.0556855	0.0235618	0.135221	0.194169	-0.231331	0.0577717	-0.100455	0.0471935	-0.0708966	-0.148179	0.0375268	0.0526276	-0.00737074	0.0740543	-0.0237678	-0.000817442	0.00390269	0.100258
Plekha4	0.243546	-0.653062	-0.321356	0.0990669	0.0631812	-0.123049	0.135677	0.0946056	-0.146619	0.0817337	0.184488	-0.333693	-0.0164231	-0.0227066	0.192086	-0.211061	-0.23982	0.117951	-0.00824881	-0.0774247	0.0192508	0.000793537	-0.132195	-0.0310253	-0.0424254	-0.0133049	-0.0141334	0.0134343	0.0130785
Eya1	-0.257193	0.027114	-0.71348	0.210061	-0.255237	0.197103	0.207356	-0.0327912	-0.187384	0.27102	0.122209	0.0396922	0.135753	-0.117444	-0.0190724	0.178718	-0.0792586	-0.0884759	0.0126231	0.0870009	-0.0205718	-0.0652055	0.0687212	0.0414817	0.054792	-0.010868	-0.0370077	0.00395198	-0.0693266
Col22a1	0.66037	0.198583	-0.166624	-0.0109483	0.235299	-0.163427	-0.0781181	-0.0719174	0.135665	-0.117812	-0.293782	0.105919	0.0805061	-0.0233499	-0.108364	-0.184045	0.0940217	-0.0130837	-0.251304	0.0402031	-0.364232	-0.0531797	-0.01157	-0.0503834	0.0180047	0.0827303	-0.00671596	0.0400455	0.00521053
3222401M22Rik	-0.755583	0.000543343	-0.0886847	0.358049	-0.290685	0.0783009	-0.0230537	-0.141618	-0.237782	-0.0643952	0.175547	0.126495	-0.035903	0.176108	0.0149597	-0.12972	-0.089986	-0.0117122	-0.0453383	-0.0182741	0.0696661	-0.0202448	0.0631913	0.040497	-0.0558028	-0.00498071	0.010047	-0.0137817	-0.00218998
Gsta3	-0.753764	-0.0645333	-0.14755	-0.323952	0.0487342	-0.0247277	-0.311408	-0.224499	-0.0110679	-0.196445	-0.0975991	0.0101135	-0.0933991	0.202939	0.114464	0.11528	-0.117901	-0.00696711	-0.0394205	0.0557305	-0.0114806	-0.00662255	0.00683804	0.0587308	-0.0270023	0.0472382	0.0135508	-0.0076432	0.0217739
Myh7	-0.701667	-0.210743	-0.15277	0.322844	0.0555221	0.0903721	-0.220436	0.0526287	0.138706	0.0910829	0.364395	0.127649	-0.10709	-0.00802018	0.0248065	-0.192418	0.020594	-0.0504472	-0.100537	0.011727	0.110889	0.0256699	0.0475921	-0.00661288	-0.114114	-0.0661261	0.00287612	0.0364667	0.0086739
1500041J02Rik	0.406279	0.42612	0.484089	-0.246683	0.144048	-0.246015	-0.0727698	-0.0111233	-0.0033876	0.0639558	0.107429	-0.195388	-0.183986	-0.021303	-0.162015	-0.0949527	0.0615799	-0.0876825	0.0440507	-0.0233709	-0.0464421	-0.0426578	-0.108707	-0.129648	0.191799	0.0681654	-0.191825	0.0925865	0.121292
Rad51	0.670445	-0.0171937	-0.146602	0.00355459	-0.132848	0.140039	-0.48391	0.190264	0.0874116	-0.016459	-0.068323	0.0680832	-0.308582	0.097274	0.0977777	-0.0241413	-0.0134845	0.0513337	-0.0722816	-0.00935601	-0.182623	0.0774039	0.10219	-0.163546	-0.0329081	-0.0162864	0.0298411	0.0165284	0.0430927
Dnajb1	0.431954	0.599495	0.267049	-0.176336	0.0328074	-0.0625597	0.108394	0.0805916	-0.122523	0.239373	0.0705764	-0.236231	0.0405768	0.0681309	0.201765	-0.212001	0.0322855	-0.0730459	0.170422	0.0346483	0.0114692	0.141358	0.0506428	-0.0210378	-0.0932675	0.0609008	-0.114562	0.0207702	-0.132786
Dnmt3l	0.548607	-0.23468	0.201246	0.16261	-0.00950705	0.377582	-0.471193	-0.0287008	-0.0211324	0.0591011	-0.283778	0.115549	0.0813293	-0.0967546	0.0994229	-0.0654181	-0.00811817	0.049548	0.0639379	0.123614	-0.139613	0.0309365	0.0261127	-0.188936	-0.0582325	-0.0129049	-0.012039	0.0311586	0.012532
Fcgr3	0.680244	0.25348	-0.243251	-0.191004	0.170474	-0.311789	0.0742903	-0.249809	0.199503	0.0318391	-0.131635	-0.155636	-0.136759	0.130885	-0.0525959	-0.134329	-0.0407234	0.0807162	-0.0353872	-0.0389295	-0.136588	0.0141599	-0.03268	0.00404034	-0.0462594	0.0858088	0.0444132	0.0386037	0.0175452
Gpr155	-0.484195	0.0104351	-0.0308127	-0.360445	0.0365833	0.282208	-0.143218	-0.446961	0.174005	0.295368	-0.223633	0.0697964	-0.133192	-0.092775	0.0571561	-0.00574057	-0.116938	0.00158168	-0.0127461	-0.168853	-0.198672	-0.156516	-0.0765778	-0.0115447	0.0978131	-0.00695758	-0.0660245	0.0699566	0.00872138
Fcgr2b	0.40704	-0.320157	-0.0653633	-0.0725597	-0.0490683	-0.336127	-0.318048	0.0854022	0.411379	-0.0462148	0.199262	0.212848	0.0787712	-0.0632908	-0.208761	0.13294	-0.321279	0.0545464	0.0687046	0.00316784	0.0580687	0.104736	0.0929216	0.104381	-0.149942	-0.0147468	0.0410657	-0.00136364	-0.0376126
Banp	0.246455	0.633216	-0.113647	-0.355051	-0.189427	-0.290538	-0.161076	0.00372447	0.0636155	-0.0257089	0.13098	0.041389	0.154582	0.124208	0.0774016	-0.200487	-0.0839622	-0.0487687	0.098201	0.020883	-0.0174785	-0.112805	0.0475112	-0.0227105	-0.165332	-0.145339	-0.213381	0.0202322	-0.11946
Fcgr3	0.745238	0.206071	-0.196027	-0.00157325	0.0883596	-0.182014	0.196061	-0.0278802	0.252355	-0.126065	0.0536522	-0.0736818	-0.242771	-0.0667596	-0.0249099	-0.256016	-0.109829	-0.0253965	0.0627565	-0.0398761	-0.034186	0.0727764	-0.117242	0.149278	-0.0441841	0.0346661	0.0297199	0.0369106	-0.000437585
Cd63	0.759344	-0.272574	-0.142368	0.0644915	0.0989774	-0.227909	-0.110076	-0.105281	0.0549305	0.16861	-0.0458048	-0.130459	0.226858	-0.227976	-0.0662716	-0.0971871	0.114811	0.149307	-0.0507313	-0.0569131	-0.0652207	0.0893422	-0.0884585	0.00950818	-0.0897091	0.0219158	0.00544265	0.0421184	-0.011107
H2-K1	0.0627607	-0.357131	-0.129156	-0.339642	-0.438119	-0.142601	-0.108739	0.127787	0.191668	0.123722	-0.107937	-0.0220854	-0.155025	-0.227354	0.249222	0.214102	0.161138	0.0763778	0.117317	0.0643254	0.0557906	0.0849982	-0.0179177	0.0630662	0.0784494	0.00618509	0.344948	0.191038	0.148915
Armet	0.681191	0.483689	0.0139029	0.00332081	-0.33415	0.0628467	0.276296	0.0280744	0.182984	0.0287113	0.101233	0.0106883	0.061996	-0.066929	-0.135525	0.015786	-0.105231	-0.0649995	-0.0412384	-0.0294775	-0.094641	-0.0531907	0.0625623	-0.038357	0.0236963	-0.0121375	0.0361745	-0.0171958	-0.0111345
AW049765	0.356383	-0.6513	0.310709	0.0886073	0.0670097	0.210545	0.333064	-0.133538	-0.06979	0.0559112	-0.0450737	0.0160283	0.206415	-0.109689	0.126042	0.0409003	0.166641	-0.055177	0.00945185	0.14188	-0.0870434	-0.110115	-0.0794354	-0.0686836	-0.00860303	0.036514	-0.0305947	-0.0129306	-0.00825485
Aldh1a1	-0.644677	0.0719741	-0.255206	-0.397557	0.0630056	0.067101	0.0365446	-0.201312	0.14795	-0.108121	-0.391133	-0.118054	0.0631053	0.0180507	0.0559667	0.0432143	-0.167907	0.0937164	-0.109066	0.177272	0.0450355	-0.0227428	0.00730304	-0.0800576	0.0442697	0.0625786	0.00264581	-0.0239776	-0.0111486
Nfkb2	0.574698	-0.3457	-0.448235	0.101809	0.245589	-0.223796	0.14146	-0.0721932	0.0123376	-0.0911724	-0.0204299	-0.11863	0.0247159	-0.0360541	0.0626052	-0.257406	-0.0134464	-0.0130002	-0.249693	0.122458	-0.0627727	0.102243	-0.0221925	-0.107107	0.0135768	0.034816	0.0186653	-0.0322453	0.0378638
9030425E11Rik	0.78051	-0.176871	-0.189595	0.3257	-0.0413849	-0.0506362	0.00303202	-0.0512016	-0.059653	0.124463	-0.209111	-0.0222472	0.267694	-0.0480081	-0.0219637	-0.0636112	0.0600649	-0.0791086	0.0952461	-0.10934	0.0365212	0.117156	-0.080802	-0.0345952	-0.115679	0.035484	-0.0033678	-0.0221444	-0.000419505
	0.577722	-0.560068	0.164317	0.0284206	0.242909	0.133255	0.212013	-0.241966	0.0181755	0.0603329	-0.0485851	0.176597	0.200058	-0.0569583	-0.0972708	0.0824422	0.0827864	0.0438758	0.108267	0.107098	0.0491376	-0.00235189	-0.0768688	-0.0315234	-0.0398849	0.0272448	-0.0322484	-0.036443	-0.0381726
Nfkbie	0.369007	-0.713998	-0.108519	0.203026	-0.270145	-0.214872	-0.143896	0.281544	-0.0517556	-0.0723234	0.133746	-0.0810306	-0.0140929	-0.0131538	-0.0268878	0.0549547	0.11505	0.123131	-0.0892424	-0.0346873	-0.00411811	0.0601911	-0.0208108	0.042249	-0.0112088	-0.034389	-0.0052435	-0.0238566	0.0108352
Plxna2	0.409025	0.402504	0.290513	-0.409388	-0.209767	-0.210901	-0.16268	-0.0109044	-0.0363649	-0.202962	-0.097026	0.187086	0.164639	0.1322	-0.1209	-0.160822	-0.102294	-0.138977	0.00902252	0.0308489	0.0127737	-0.0290973	-0.183546	0.0779306	-0.0696371	-0.0134205	0.104488	-0.0940426	-0.187771
	-0.567808	-0.160449	0.211002	0.0486479	-0.208076	-0.120463	-0.111661	-0.379363	0.185667	-0.227903	0.0346947	-0.127843	0.111703	0.0476604	0.0405701	-0.245586	-0.225055	0.115082	0.0170231	-0.172022	-0.0318009	-0.180605	0.0654715	0.0555648	0.0598089	-0.24798	-0.0953191	0.000636314	0.0341751
Cdh13	-0.465836	0.0498328	-0.0442642	0.598748	0.264672	-0.0668727	-0.0983388	0.021777	-0.118701	0.0331585	0.0385102	0.234007	0.313112	-0.276485	0.0768326	-0.105896	-0.0488906	0.14943	0.011711	0.082305	0.0429457	0.125779	-0.0502583	-0.0672274	0.109004	-0.024897	0.0170329	0.0559059	0.00984619
Pdpn	0.679416	0.0486247	0.358492	0.435604	-0.126076	0.188081	0.0871744	-0.0841343	0.0656651	-0.169594	-0.100846	0.031104	0.114204	-0.232451	0.0369841	0.0846598	0.0524013	0.0488051	0.019976	-0.115641	0.0736578	0.0621656	0.0417215	-0.00420786	4.01413e-05	0.0197418	-0.00414665	0.00917675	-0.0394051
Pla1a	0.413805	-0.431812	-0.373138	-0.0844637	0.43318	-0.240726	0.0788883	0.0895581	-0.0587792	-0.226026	0.183472	-0.169483	0.206706	0.10293	0.148195	-0.0766981	-0.0301513	-0.0310792	-0.0220777	0.0378878	-0.0799153	0.0385228	-0.119629	-0.0203209	0.0949717	0.0267024	-0.0355714	-0.00214603	0.0247095
Ptges	0.38005	0.00655025	-0.348274	0.0886148	0.257295	0.130672	-0.131963	0.4249	-0.131914	-0.0390228	0.00219009	-0.0340915	0.306037	0.370257	-0.199618	0.0702374	0.0795702	0.110322	0.129138	-0.0526173	-0.291842	0.0266994	-0.040013	-0.129639	0.0549005	0.00910861	-0.0456718	0.0319255	0.0328512
	-0.626669	-0.311212	-0.441512	-0.187506	-0.0844315	0.0677924	-0.122385	0.134686	0.239889	-0.0295269	0.0527254	-0.0813607	0.0898254	0.109075	0.177283	0.180526	0.0120847	0.229018	-0.0209085	0.0481039	0.0373489	-0.0117012	0.0547515	-0.137315	0.00442358	0.0129036	-0.00363851	-0.0361048	-0.05883
Dusp6	0.463326	0.291331	0.450642	0.303015	0.151521	0.179893	-0.134944	-0.047403	-0.0832781	0.365053	-0.0766514	-0.0523019	-0.159235	-0.0231043	-0.111435	-0.0301693	-0.0977567	0.0902954	-0.0790262	0.146935	0.0866747	-0.0392354	-0.112304	0.251615	0.0255831	0.00916732	-0.0822417	0.057026	-0.0219212
Nr1d1	-0.029683	-0.0928155	0.558584	-0.514231	0.259081	-0.0516558	0.158194	0.0263247	0.111849	-0.281134	0.0112171	0.26545	-0.0147164	0.134989	0.186954	-0.0803068	-0.0266086	0.170519	0.066029	-0.0615959	0.166502	0.0707883	-0.0732129	-0.107279	0.0438992	0.0652448	0.0506303	-0.0166871	0.00136896
Htra1	-0.378822	0.132675	0.0288927	0.716373	0.0845024	-0.358293	0.190308	0.102106	-0.00718236	-0.155426	-0.0462355	-0.260633	0.0584194	-0.099098	-0.0404912	0.149184	-0.0358893	-0.0202251	0.0569338	-0.0175391	-0.0137203	-0.0475941	0.00516309	0.0185625	-0.0419609	-0.00332766	0.027131	-0.0126545	0.0237989
	-0.571416	0.0939538	-0.494554	0.104241	-0.218821	0.0129743	0.256344	0.078894	-0.113274	0.280905	0.144369	0.050926	0.172071	-0.056999	0.00247634	0.0629634	-0.0361042	-0.0746226	-0.00946327	0.124437	0.1136	-0.119199	-0.0899435	-0.110622	-0.127176	0.068366	-0.0340591	0.0703244	0.200942
Itgax	0.248441	-0.817524	-0.06037	0.0914661	-0.025208	-0.0486301	0.182014	0.321126	-0.0308358	0.0933283	0.155934	-0.0192938	-0.159601	-0.0426376	-0.0458572	-0.145845	-0.0378428	0.103006	-0.0844657	-0.0113317	-0.0377083	-0.0338916	-0.0387005	0.00094946	0.0116001	-0.0660909	-0.056507	-0.0487759	0.0144304
Slc7a8	0.508389	-0.396407	-0.200139	0.178046	-0.113073	-0.45837	-0.110094	-0.00162039	-0.0914923	0.0665694	0.00963426	-0.315739	-0.0274114	-0.093013	-0.0701736	-0.0418469	-0.166131	0.259503	-0.022684	0.0468435	0.186979	0.108345	0.0216324	0.0366364	-0.0350099	-0.0159308	0.00653724	-0.0193131	-0.0302273
Plek	0.251622	-0.580563	0.189562	-0.0758383	-0.491277	-0.00374398	0.0355596	0.129094	0.00708023	-0.279702	0.150533	-0.104465	-0.107319	0.0666858	-0.260163	-0.0545886	-0.158475	-0.151042	0.0642468	-0.066878	-0.146329	0.0391012	0.0470484	0.0299625	-0.0531412	0.0293225	0.100659	-0.0501785	0.0353661
Matk	0.389267	-0.641335	-0.093313	-0.160677	0.219152	0.264897	-0.00315323	0.193076	0.0705656	0.204093	0.0716657	0.0178806	0.240028	-0.228979	-0.107088	-0.131014	0.159399	-0.00857297	0.0221809	-0.00767207	0.0459921	0.0633533	-0.0516793	-0.0726927	-0.104061	0.0127859	-0.0441111	0.0440001	-0.037325
	-0.496276	-0.205249	0.384733	-0.346298	0.0713156	0.0276493	-0.234435	-0.0867839	0.364272	-0.171887	-0.168479	-0.144125	0.13365	0.270181	-0.0586453	0.0699998	-0.000714916	-0.0911736	-0.0959404	-0.0141757	0.0286047	0.0109314	-0.0475552	0.00161647	-0.10744	-0.134238	-0.0482583	0.108326	-0.0125426
Isyna1	0.489869	-0.339511	-0.294823	0.0807285	0.0525166	0.574726	0.0950718	0.0261568	0.153803	0.185184	0.13444	-0.178604	0.0697971	0.105729	0.107563	-0.046072	0.0410784	-0.0302992	0.0986354	0.112084	0.133926	0.0298455	-0.0967642	-0.00835803	-0.103549	0.0271804	-0.0326304	-0.0637001	-0.0335516
Tnfaip3	0.452371	-0.570465	0.00477912	0.138079	-0.0125341	-0.061603	0.036511	0.320951	0.167853	-0.00824691	0.00480237	0.101333	-0.299949	-0.310078	0.216253	0.0913403	-0.192231	-0.0608058	0.0679878	0.0188325	0.0110043	0.0692392	-0.0870635	-0.060638	0.0177173	-0.00347201	0.0220589	-0.0110909	-0.00712423
Igsf6	0.319772	-0.481512	0.342498	0.0287649	-0.314826	-0.221313	0.271309	-0.146029	0.175626	-0.229711	0.229707	-0.013626	-0.0854669	0.173455	-0.144292	0.0257191	-0.110516	0.0223294	0.125946	0.0795278	-0.121224	-0.0116461	0.103126	0.064259	-0.0197911	0.132351	-0.148535	0.0265388	0.0642408
Cpne5	-0.644752	-0.268607	0.120171	0.328526	-0.226934	0.0788398	0.130379	-0.151531	-0.0664019	0.070088	0.259682	0.156485	0.114567	-0.171306	0.271838	-0.101507	0.0813275	-0.195118	-0.0794321	-0.00149243	0.0549749	-0.0547299	-0.00290526	-0.0519902	-0.0576002	-0.018933	0.0184811	-0.0173937	0.0117682
Il18bp	0.616834	-0.0671309	0.223052	-0.309421	-0.222458	-0.0291691	0.318797	-0.18739	-0.397693	-0.0298827	0.00963335	0.0738539	-0.0773175	0.0215895	-0.172717	-0.164143	0.0431519	0.0288623	-0.0304921	0.0822705	0.0392156	0.0425618	0.13194	-0.0884054	0.111724	-0.0121639	0.0421712	-0.00151654	0.0351496
P2rxl1	-0.137713	-0.435919	0.355955	-0.333138	0.17043	0.382465	0.192617	0.149071	-0.211853	0.0955199	-0.114737	-0.106985	-0.0186076	0.129662	0.243441	0.172705	0.0373908	0.0731266	-0.109599	0.0412632	0.00463356	0.0996202	-0.0226075	0.0785896	-0.126948	-0.249825	0.0563236	0.0478522	-0.112814
LOC56628	0.255354	-0.453822	-0.0817774	-0.258513	-0.394355	-0.248377	-0.277597	0.149033	0.216969	-0.0881722	-0.028986	-0.162304	-0.348497	-0.0302262	0.201761	0.239465	0.0901223	-0.0501179	0.0688234	-0.00904449	0.0154475	0.0497399	-0.0201055	0.044291	-0.102238	-0.0239851	0.0241747	-0.0652274	-0.000599114
	-0.405523	-0.532572	0.114566	-0.421121	-0.0927468	0.0284406	-0.0158718	0.135813	0.213099	-0.232744	-0.108732	0.035876	0.207918	0.196429	0.0485488	0.0594036	-0.050403	0.153449	-0.035364	-0.00914845	0.0580001	-0.206463	0.015239	0.0199649	-0.130951	-0.153459	-0.131107	-0.00344426	0.0317691
Foxo6	-0.6718	-0.0738015	-0.23216	0.187507	0.394081	0.109246	-0.0277236	0.25157	0.167195	-0.0136565	0.176088	-0.143261	0.0223324	-0.0808055	-0.114425	-0.0171839	-0.0474592	0.130805	0.0843985	-0.0745117	-0.224502	-0.0610468	-0.0154852	-0.184493	-0.0420871	-0.00140539	0.0197365	0.0112853	-0.00833242
Dpt	-0.00590023	0.514202	0.240768	-0.234155	0.11633	0.155528	-0.127189	0.298918	0.200867	0.247865	0.0309961	0.0379435	0.00699334	0.0667915	-0.188537	-0.168702	-0.0909252	0.0407622	0.216499	0.31838	0.121251	-0.227857	0.118794	-0.00173359	-0.0230396	0.0932723	0.154836	0.186046	0.00954081
Slco2b1	-0.731004	-0.216927	-0.189695	-0.232898	-0.109018	-0.141199	-0.0355591	-0.110873	0.0590672	-0.246607	0.0248821	-0.14362	-0.0104997	0.218865	-0.190797	-0.062141	0.0278346	0.01445	0.200916	0.220578	-0.104768	-0.0105805	-0.0620637	0.0415	-0.0314739	-0.0161882	0.0154562	0.0134086	0.0283753
P2ry2	0.284784	-0.000475212	0.386003	-0.185809	-0.0187033	-0.232041	0.216682	-0.207186	0.232163	0.383863	0.158795	0.0138048	0.375396	-0.216056	-0.0948772	0.118412	-0.0783548	-0.159876	0.0256655	0.02047	-0.00390523	-0.0310447	0.131348	-0.0447131	-0.00403803	0.172459	-0.244164	0.0947561	0.0515859
	0.430422	0.498702	-0.382279	-0.0456163	0.231203	0.187921	0.073775	0.0956442	-0.0664568	0.00471743	0.152885	0.0131846	-0.120302	-0.343006	0.00538606	0.199371	-0.128806	-0.181005	-0.0557052	-0.0521706	-0.0226133	0.10294	0.142812	0.0331029	-0.14339	0.0240349	0.00820805	-0.0178367	-0.0725492
Tle2	-0.186238	-0.642725	0.42828	-0.0363056	-0.0516283	0.166107	0.240811	0.0871953	0.162216	0.326255	-0.112259	-0.024536	0.233506	-0.000664718	0.0414257	-0.0818197	-0.142409	-0.028126	0.0683514	0.128452	-0.117937	-0.0136388	0.0376976	0.0448539	-0.00797726	-0.00987053	-0.0204127	-0.0162279	0.0460308
Il1r2	0.669319	0.0700379	0.123671	0.289724	0.0243394	-0.075109	0.172841	0.0177745	-0.229594	-0.0104048	-0.125049	0.276836	-0.16868	0.0812161	0.210171	0.0066228	-0.208579	-0.246164	-0.010859	0.0899872	0.217177	0.0470606	0.0900815	-0.102995	-0.0020001	-0.0637604	-0.0266349	0.00511101	0.0431339
Birc3	0.275795	-0.798208	-0.152233	0.103681	-0.00989106	-0.091825	0.178428	0.342742	-0.114619	0.0841273	0.106654	0.0135104	-0.151202	-0.0384274	-0.0698886	0.0172733	-0.0299393	0.0965676	-0.088926	-0.0280243	-0.0327155	-0.0144854	-0.0713551	-0.0210945	0.0368162	-0.00926187	-0.0545856	-0.0568356	0.0190229
Pycard	0.214633	-0.673774	-0.506874	-0.0329695	0.284864	-0.0338107	0.0582044	-0.0315275	0.0288549	0.009657	0.114789	-0.120075	0.000464748	0.0101051	0.0195443	-0.261985	-0.166312	0.0477226	0.00232648	-0.0210212	-0.0134838	0.0874258	-0.123392	-0.0604983	-0.0150809	0.0137131	-0.000325395	-0.0107031	0.00384613
Mamdc2	-0.673371	-0.197078	0.530198	-0.0293117	-0.0110948	-0.00073439	-0.126949	0.0341598	-0.167503	-0.096953	0.0999285	-0.0326889	0.11874	0.135607	-0.169741	-0.0142219	0.0310027	-0.0253908	-0.171592	0.0615253	-0.0389415	0.162388	-0.0881467	-0.0216147	-0.0437604	-0.101388	-0.104852	-0.0527995	0.0375301
2210421G13Rik	-0.143983	0.313909	-0.4455	0.337146	-0.181996	-0.448429	0.0611691	-0.167222	0.0627769	0.135749	-0.0596014	0.0701813	-0.120328	-0.0332713	0.165007	0.0705958	0.131326	-0.0118606	0.0609013	0.0831366	0.11549	0.109989	0.229372	0.0950325	0.124544	-0.0609025	-0.22105	-0.0175416	-0.201383
Ids	-0.316843	0.367514	-0.0568298	0.180912	-0.567306	-0.0991643	0.273007	-0.332166	-0.192804	0.103067	0.0163764	0.121999	-0.129637	0.107689	0.0498223	-0.0732188	0.00601875	0.255611	-0.146182	-0.0471551	-0.0478982	-0.103239	0.0411724	0.0153848	-0.0268858	0.0616885	0.0615956	-0.025934	-0.00312266
D11Ertd759e	0.376023	-0.424552	0.0852303	-0.308933	-0.410045	-0.417654	0.185017	0.0705704	0.197476	0.145734	0.196948	0.00453039	0.106034	-0.000949011	0.00359981	0.142277	-0.0282403	0.0371179	-0.010123	-0.0140235	-0.0167004	-0.0167778	0.10567	0.0147434	-0.0308776	0.132354	-0.162312	0.0160498	0.0619711
Rsnl2	0.519217	-0.496529	-0.0441971	-0.209612	0.00401432	0.437547	0.021109	0.0828417	-0.149227	0.204723	-0.081122	0.131405	-0.0661972	0.0422149	-0.0285218	-0.0775032	0.0250334	-0.28282	0.0162417	-0.0142221	0.141329	0.0465639	-0.114293	0.107744	-0.0714875	0.0349647	-0.0542981	0.0302139	0.0104751
Cdca7	0.337444	-0.391156	0.393232	0.226418	0.332208	0.283881	-0.0249147	0.111353	-0.300009	0.0526676	0.0609537	-0.0332936	0.0162496	0.210416	0.0221046	0.243082	-0.138647	0.0942386	0.0517965	-0.0953574	0.172065	0.0294466	0.132937	-0.125378	0.118534	-0.0076506	-0.056621	-0.0201184	-0.00876602
Vldlr	-0.695531	0.214239	0.162631	-0.176496	-0.182764	0.256678	-0.249026	-0.132983	-0.139838	-0.00565236	0.0559956	-0.181367	0.0211013	-0.0692661	0.138488	0.142885	0.00363025	0.0436098	0.200036	-0.120908	-0.223371	-0.0443076	0.0356422	-0.138434	-0.027712	0.040492	0.0342554	0.0208391	-0.0210724
Trem1	0.744617	0.187444	0.136078	0.222834	-0.182274	-0.00706972	0.315602	0.0695763	0.0437231	-0.183619	-0.117115	0.0222309	-0.26619	0.0518603	-0.00727639	-0.026147	-0.102768	-0.150501	0.167491	-0.0920035	-0.0343658	0.0147468	-0.000930934	-0.0543234	-0.0266986	-0.0547147	0.0339327	-0.00301386	0.038098
Cxcl16	0.837519	0.0450218	-0.156344	-0.0866967	0.00361673	0.116338	0.183162	0.0829382	-0.279309	-0.0669435	-0.00467636	0.00209199	-0.00647435	0.110681	0.0597089	-0.178911	-0.141982	-0.0321961	0.147444	-0.0128053	-0.0261068	0.145172	-0.0400406	-0.0349515	0.104901	-0.00701375	-0.0135674	-0.0212626	0.0290376
Dbn1	0.378478	0.21981	0.072226	0.0990262	0.32901	0.559531	-0.20641	0.348655	-0.0877785	-0.180934	0.0164357	0.0480349	0.072855	-0.249862	0.0906513	-0.1249	0.00466583	0.0793888	-0.0217263	0.0874294	0.0724669	-0.09847	0.121057	0.0108034	-0.139411	0.0233022	-0.0789854	-0.0467891	-0.0280188
Klf7	0.175233	0.421916	0.771236	-0.106297	-0.251241	0.0563596	-0.0361973	0.042277	0.105616	-0.0503265	-0.0270539	-0.0717631	0.191709	0.158764	-0.00635621	-0.0765981	0.00190526	-0.0540373	-0.0647349	-0.0472229	0.0830637	-0.00764332	-0.0265424	-0.0572629	-0.0117968	0.0363447	0.0525727	-0.0181631	0.0592021
Ifitm1	0.448814	-0.0332054	-0.111731	-0.444318	-0.289041	0.287082	0.0350288	-0.0072518	0.133555	-0.107096	-0.0377556	-0.288227	-0.364271	0.284741	-0.00361212	0.15808	0.0782548	-0.122976	-0.0269375	-0.103643	0.014153	-0.128646	0.0430218	0.0095953	-0.0335752	0.0276493	-0.0374111	-0.10695	-0.0400512
Scx	-0.237266	0.173151	-0.0407168	0.587446	-0.319171	-0.0801257	0.275014	-0.353546	0.0539251	0.210686	-0.0663924	-0.0293601	0.197634	-0.162504	-0.170848	-0.0534793	0.103782	0.0821858	-0.030917	-0.138237	-0.027438	-0.104959	0.0321164	-0.00446932	0.222041	-0.0845479	-0.0205387	-0.0260606	-0.00314484
Ctla2b	0.401788	-0.0186106	0.404999	0.140447	-0.280387	0.330498	-0.156441	0.0476831	-0.0444307	-0.397965	-0.103036	0.00249925	-0.361793	0.00535358	0.0631925	-0.153932	-0.112538	0.0721882	-0.162931	-0.0889445	-0.0269563	0.0377047	-0.0570657	0.214931	0.0243447	0.0310576	-0.0343956	-0.0452065	0.0396964
Saa4	0.386635	-0.519415	-0.162783	0.125041	0.00779134	0.010018	-0.230792	0.306595	-0.127457	-0.300833	-0.0978822	0.0502679	0.228825	0.313229	-0.0335622	0.0882002	-0.00298422	-0.0625508	0.214944	-0.042411	-0.0131754	0.139276	0.0762211	-0.168876	0.0297423	-0.0665142	-0.0364378	-0.0151004	0.0155882
Hspa5	0.656016	0.444109	-0.180007	0.398124	-0.0221291	-0.18027	0.197525	-0.138272	0.0263987	0.119701	-0.0630393	-0.118417	0.0529728	0.0667934	0.129322	-0.0561519	-0.116022	0.0104571	-0.0692219	-0.0942205	-0.00325862	0.00732744	-0.0392444	-0.00949396	0.00457705	-0.0119972	-0.0111428	0.0252686	0.018831
Herc3	-0.526804	-0.600959	-0.0334168	0.207983	0.116939	0.0138594	0.174736	-0.157017	-0.0249548	0.230067	-0.120685	-0.140318	-0.160131	-0.0437324	0.0868601	0.0102172	0.0123783	0.00232769	0.146686	0.123837	-0.123488	0.205704	-0.105669	0.0219818	0.0977424	-0.0016857	-0.0332861	0.0813331	-0.0371953
	0.530906	-0.558116	0.0749968	-0.198556	-0.0811382	0.124316	0.341357	-0.0729526	-0.126977	0.0697118	-0.0788351	-0.102206	0.0101964	-0.121383	0.0383909	0.119012	0.221441	-0.265602	0.0113067	-0.0544152	-0.0770616	-0.0574014	-0.0443566	-0.105403	-0.0365184	0.0411943	-0.0288277	-0.0270501	0.00425439
Rnase6	-0.741031	-0.43606	-0.0195753	0.173858	-0.187708	-0.16475	0.106671	-0.118769	0.06431	-0.231932	0.0920636	-0.0627373	-0.0701962	-0.102505	-0.0236453	-0.100218	-0.0928502	0.136607	0.00636981	-0.02094	-0.0396232	-0.0668045	0.0191395	-0.00466822	-0.0891393	0.0395612	0.0211571	0.0346844	-0.0230774
Ctsf	-0.596521	-0.16648	-0.170251	0.288582	0.433408	0.0799794	0.293422	0.0279338	0.0371833	-0.246591	0.0114023	-0.0162631	0.0196277	0.035711	0.142518	-0.118088	0.227415	-0.173351	0.138889	0.00331547	0.101732	0.0305619	-0.0654614	-0.0711102	-0.00744093	-0.0412143	-0.0256654	0.00712829	0.020202
Cdt1	0.263252	-0.641592	-0.347582	0.19152	0.271183	0.170777	0.00295576	-0.126945	0.140251	-0.0535567	0.162328	-0.0678544	-0.0198628	0.109909	0.0710749	-0.188178	-0.15339	0.243873	0.0248511	0.159585	-0.0537333	0.0249657	-0.140406	0.0151125	-0.00226489	0.0529548	-0.0173177	-0.0199181	-0.0161357
Ier5l	0.160525	0.265677	0.694914	-0.153429	-0.224314	0.122053	-0.287373	0.0328325	-0.00240805	-0.0487804	-0.0498652	-0.180053	0.150779	0.121388	-0.125302	-0.0051762	-0.125236	0.121575	0.0471071	-0.0779782	0.0429772	-0.0491595	0.0796564	-0.239326	-0.0668094	0.100049	-0.0981973	-0.00540699	-0.16445
Abca8a	-0.70639	-0.250348	0.201921	-0.364324	-0.107423	0.168928	0.196895	0.214781	-0.151651	-0.159919	0.0487049	0.0691648	-0.160089	-0.0455215	0.0237067	0.0301858	-0.100218	0.103868	-0.0427668	0.0981656	-0.00626009	-0.124382	0.00720685	-0.0519657	0.0582793	-0.00745193	-0.00960907	0.0290621	-0.00291732
Parp9	0.322924	-0.67602	0.079064	-0.276188	-0.503962	0.00265343	0.0373185	0.116374	-0.128718	-0.0676867	-0.160976	-0.0473794	0.00687994	0.01839	0.0339663	0.0739986	0.107695	0.0406015	0.0970532	-0.0572539	0.0316414	0.00124224	-0.0258853	-0.0277043	-0.0424034	0.0196635	0.0084306	0.00665554	0.0160937
Tubb6	0.698654	0.336648	-0.308087	0.31948	-0.00756124	-0.22388	-0.173393	-0.154828	0.14915	0.0119705	-0.0434716	0.0308592	0.141757	0.145226	0.0429793	-0.0715795	-0.00156823	0.0450118	0.0155302	-0.0613289	0.0291312	0.107777	-0.0324939	0.0541588	-0.0157119	-0.0120134	0.0196033	0.0172024	0.0201589
Gprasp1	-0.652474	-0.0241432	-0.506909	0.0620635	-0.229921	-0.0510384	-0.0300928	0.0412342	0.161484	0.178361	0.0352595	0.156267	0.277627	0.0450032	0.0243674	-0.0566715	0.0705658	0.0443253	-0.120624	-0.136287	0.17226	0.0223749	0.0405476	-0.00978201	-0.12377	-0.0139794	-0.00244498	0.00339998	-0.028923
BC025833	0.43153	-0.555204	0.51643	0.202787	0.0661013	-0.130382	-0.0613497	-0.204462	-0.197887	0.0581149	0.108312	0.117951	-0.0256522	0.0962394	0.0306239	0.156412	0.0923525	-0.0117968	0.00405616	0.0836957	0.0236799	0.0113239	-0.0273819	0.0684986	-0.0362213	-0.0142911	-0.039995	-0.0477396	0.00717411
Ccl5	-0.417087	-0.188891	-0.0161547	0.18907	-0.401503	0.110131	-0.0340615	0.000199801	0.421652	-0.0607629	-0.0701417	0.404836	0.0749355	-0.0794537	0.00950125	-0.0859333	-0.0856637	-0.0947243	0.226117	0.172127	0.026038	0.170424	-0.15524	-0.109579	0.161028	-0.110815	0.0438679	0.0827919	0.0165272
Pdia6	0.744728	-0.0585202	0.230057	0.363234	-0.288178	0.101908	0.0745902	0.0189554	-0.222118	-0.0609206	0.02622	0.214423	0.0400804	0.0110949	0.0533964	-0.0956424	-0.0115294	0.155434	0.0196877	0.0841381	-0.0375911	0.0282106	-0.0295705	0.0244714	0.071171	-0.0394267	-0.0289386	-0.00957418	0.0361121
Dnaja1	0.61567	0.651847	0.0508337	-0.142753	-0.0585382	-0.0162739	0.156186	0.0604802	-0.195082	-0.0035157	0.103323	-0.115288	0.030935	0.0523535	0.189735	-0.0855102	-0.0348398	0.031587	0.0760966	0.039876	0.0196684	0.0887269	-0.0404311	-0.0115286	-0.0982775	0.0359984	0.0413995	-0.000455393	0.00246804
Nme1	0.729845	0.369516	0.106662	0.267019	-0.0150745	0.0534157	0.156996	0.00895808	0.062265	0.291825	-0.12838	0.00973523	0.227922	-0.142293	-0.00757661	0.0513154	0.144461	-0.0820066	-0.0231063	-0.0330081	0.0572046	-0.0519694	-0.00175617	-0.0450603	-0.0157871	-0.0234334	-0.0242145	0.0329426	0.0102476
Fgr	0.00104296	-0.697115	0.313219	0.286817	-0.245781	-0.0899257	-0.0181281	0.0502198	0.109693	-0.0622652	-0.146673	0.0118228	-0.020276	0.24095	0.074059	-0.203754	-0.00524193	0.122384	0.101296	0.0544359	-0.060318	-0.00814933	0.038658	0.0549014	0.0534223	0.0969462	-0.214729	-0.0103804	-0.156117
Acaca	0.096913	0.132337	-0.518068	0.4151	0.267412	-0.256948	0.0175885	0.172479	-0.0558226	-0.118255	-0.063755	-0.00624754	0.00686771	0.072432	0.10437	0.259478	0.144673	0.22298	0.0631015	0.296268	-0.0453618	0.076159	-0.04081	0.196295	-0.122317	-0.0716437	0.122978	-0.0145214	0.119132
Kifc2	-0.508714	-0.5461	0.139717	0.138946	-0.0141791	0.00500242	0.305631	0.0488818	0.0385281	0.110864	-0.19881	0.0902115	-0.151705	0.141708	0.0952307	0.000523121	-0.0167456	0.103138	0.0541987	0.14196	-0.177933	0.187607	-0.0954539	0.0490149	0.043345	-0.180718	-0.182679	-0.111541	0.0424127
4930511H11Rik	-0.18289	-0.646122	0.256034	0.152296	0.132475	0.296794	0.213681	-0.0607024	0.0391406	0.0172827	-0.0411252	-0.0645598	0.0632548	0.0169595	-0.066054	0.241889	-0.203424	-0.0539652	-0.232584	-0.0268782	-0.112284	0.0280538	0.00972054	0.0838534	-0.0951806	-0.253088	0.0406027	0.0968261	0.163492
Hyou1	0.37008	0.319554	-0.254729	0.275705	-0.191261	0.0348348	-0.0449404	-0.0461334	0.0866727	0.10931	-0.0795023	-0.275277	0.0730906	-0.0842357	-0.0541508	-0.173743	-0.477779	-0.10569	-0.244405	-0.00700205	-0.174436	-0.0632569	-0.147523	0.248474	0.00127799	0.111854	0.0127383	0.0200389	-0.0270824
Dixdc1	-0.649466	-0.548489	0.184698	0.0270383	0.0715307	-0.00560104	-0.240091	-0.0278271	0.0618351	0.0882344	-0.0581555	0.192835	-0.0692764	0.0679075	-0.0911921	0.0376979	0.00222135	-0.0406062	-0.21171	0.0277155	-0.0127465	0.145552	-0.105221	-0.0692721	-0.0900458	0.0440811	0.0298375	0.0981611	-0.0508011
Kpna2	0.566434	0.511847	0.109996	-0.200534	-0.0811129	-0.147777	-0.223667	0.00458482	0.0921295	0.0809834	0.222015	-0.130575	0.229317	0.0559253	-0.0685157	-0.14097	-0.0349352	-0.156509	0.052049	0.0323399	0.0540104	0.07253	-0.0791983	-0.103969	-0.117655	0.176378	-0.100079	0.0875695	0.0857456
2900006A17Rik	-0.350072	-0.330436	-0.299587	0.455075	-0.18654	0.180391	-0.146027	-0.0361294	0.249397	0.254725	-0.35849	0.0146673	0.145902	-0.156484	-0.0686462	-0.0746269	-0.0454115	0.0536524	-0.112489	-0.0882315	-0.0325998	-0.113988	-0.0690881	-0.0493105	0.107242	-0.0285574	-0.100001	-0.0187704	0.0164415
Frmpd1	-0.532096	0.0842146	-0.121459	-0.011447	-0.185342	0.228985	0.460597	-0.242858	-0.239546	-0.0133201	0.117012	0.157736	-0.166147	0.141393	0.285489	-0.164406	0.22858	0.0153489	-0.0122202	-0.00557945	0.119012	-0.0863263	-0.0205411	-0.0866242	0.0438464	-0.00233239	0.00743859	-0.015005	0.0174958
Pdia6	0.588918	0.15865	-0.179584	0.491464	-0.133229	-0.14889	0.0594692	-0.0819811	-0.0688157	0.0307834	0.0196058	-0.147027	0.140021	0.180907	0.0383399	-0.010526	0.0318672	0.174573	-0.268276	-0.305794	0.0786511	0.0585665	0.0594742	0.0983417	0.0387358	0.0332904	0.00312277	0.00515707	-0.00157524
A630005I04Rik	0.132981	-0.0317671	-0.70615	0.154734	-0.482461	0.143913	-0.0222496	0.00927497	-0.0450018	-0.128294	-0.0904468	0.0250618	-0.0927429	-0.185966	-0.227386	-0.0418585	-0.0797575	-0.112684	0.103888	-0.0201775	-0.0927816	-0.0827514	-0.128559	-0.12059	0.00846751	-0.0550075	0.00497332	-0.0283345	0.00358192
Tspan2	-0.626725	-0.108357	-0.131678	0.00772928	-0.169825	0.390235	-0.0462671	-0.265023	-0.0639874	0.0505209	0.0718392	0.0557897	-0.0940969	0.125249	0.0379686	-0.273423	0.348275	0.0280141	0.0984349	-0.0776872	0.217772	0.0963618	0.00706105	-0.0271613	-0.0931343	-0.0633316	-0.0206598	0.020304	-0.0091229
Mcm2	0.762297	-0.218362	0.150685	0.442213	0.0932015	0.0855702	-0.172513	-0.0312754	-0.0695331	0.0653264	-0.112986	0.187786	-0.0273279	0.163859	-0.0388231	-0.0105972	0.0663415	-0.040303	-0.0231124	0.0803642	-0.0400219	0.019864	-0.0129564	0.0480165	-0.0287777	0.00213442	-0.013244	-0.000983793	0.0370089
Mcm3	0.563069	-0.07694	-0.0225328	0.491536	0.0249422	0.278684	-0.399769	0.130662	0.33564	0.0102021	-0.160857	-0.00879872	-0.0197974	-0.0158172	0.00449477	-0.0444669	0.0812564	-0.0140036	-0.00963768	0.133402	-0.0441335	0.0291099	-0.0511679	0.0482222	-0.0602418	-0.032785	-0.0323328	0.0136033	0.00569221
Gale	0.481193	-0.0557861	-0.2185	-0.456083	0.273664	0.150963	0.0313989	-0.238098	0.113181	0.0198646	0.0883746	-0.308654	0.314065	-0.00368282	0.144083	0.0726147	0.177347	-0.21979	0.0987898	0.0175508	-0.035975	0.0597901	-0.0757857	-0.0152049	0.103262	0.0385234	0.0150982	-0.0140066	-0.00472901
Cstb	0.524311	-0.508136	-0.1365	0.0832653	0.308142	0.0621016	-0.108563	0.163082	0.0671001	0.12386	-0.146138	-0.138597	-0.0510818	-0.142767	-0.284043	-0.210228	0.0652514	-0.0854972	-0.193677	0.151846	0.0391871	0.066447	0.0400433	-0.104922	-0.044292	-0.046764	-0.0293116	0.0100296	0.00750001
Glipr2	0.535138	-0.201654	-0.36366	0.505936	-0.258483	-0.180656	0.0629902	0.0628809	-0.0451396	-0.0266916	0.0771217	-0.153848	0.0588822	0.0540016	0.213757	-0.112118	0.076082	-0.127434	-0.170218	0.087894	0.0918982	0.0757741	0.00650791	-0.0370122	0.0268855	-0.0134907	0.00976581	-0.0637749	0.0310584
Plaur	0.680882	0.408824	0.360108	-0.16947	-0.10293	0.053965	0.100117	-0.0478568	-0.0405388	0.213524	0.0645751	0.00090079	-0.122305	-0.167765	-0.107359	-0.142781	0.133692	-0.1144	-0.00436762	0.0246394	-0.0116144	0.0190411	-0.0650978	0.144558	0.0279769	-0.0168089	0.00288873	0.0145192	0.010876
5530400B01Rik	0.231293	0.598354	0.557006	-0.108033	-0.00735878	0.006659	0.0814464	0.133688	0.0762105	0.217789	0.0194262	-0.106722	-0.00509626	0.142928	0.114768	-0.185815	0.147172	0.0166849	0.101576	0.20521	0.0724742	-0.0221607	-0.127538	-0.093193	0.0312108	-0.031994	-0.00342282	-0.0043528	0.041159
Nek6	0.676954	-0.457008	-0.00594328	-0.032073	0.0677389	-0.21118	-0.123235	-0.271524	-0.225725	0.160483	-0.0788392	0.0497234	0.146702	-0.131355	0.0267789	-0.142864	0.0201377	-0.0454327	-0.0421229	0.0395919	0.0963815	0.169734	0.0364405	-0.0355577	-0.0357703	0.00261193	-0.00572872	0.0170395	0.0174627
2600010E01Rik	-0.460157	-0.303403	-0.0842097	0.482597	-0.311868	0.0647534	0.131456	0.152176	0.015541	-0.103562	-0.0379541	0.191933	-0.210231	0.0215983	0.0480214	-0.0701922	0.16255	-0.000151062	0.285715	0.135605	-0.0405604	0.0573049	0.141823	0.128214	0.134741	-0.14904	-0.0501575	0.03897	0.0291192
Cxadr	0.253564	-0.55968	0.347081	0.0698356	-0.0695207	0.0575021	-0.485375	-0.101057	-0.208524	0.0259002	-0.0517142	0.0386862	-0.112552	-0.137523	0.160005	0.086924	-0.0415534	-0.294241	0.0911776	-0.108387	0.0185729	0.102367	0.0271319	0.0269522	-0.0519918	-0.0746468	-0.0215756	0.026575	0.00434491
Upk1b	-0.404071	0.402045	0.152798	0.164576	0.267368	-0.247104	0.197022	0.164589	-0.26664	-0.0627343	0.0814091	0.125762	-0.145515	0.0896301	-0.0635509	0.0312921	0.199994	0.385553	-0.1401	0.0640796	-0.089735	-0.094335	0.128357	-0.168492	0.120905	-0.0570539	-0.0311273	0.0358108	0.0131912
Serpine1	0.393245	-0.0502622	0.338164	0.329978	0.145919	0.0447455	-0.0827374	0.0231068	0.24862	0.110132	-0.0922604	-0.0826664	-0.210336	-0.170159	-0.151926	0.0155984	-0.0863093	-0.034475	-0.0247869	0.224065	0.442404	-0.183153	-0.306075	-0.00439702	0.0686273	-0.0676108	-0.0827611	-0.0674143	-0.00335776
Ube1l	0.423489	-0.594231	0.0494424	-0.287377	-0.226115	0.00853824	0.471201	-0.0114491	-0.0747971	-0.0449854	-0.106095	0.0359171	0.0228713	0.0258312	0.16431	0.0445572	0.119997	-0.115564	0.014705	-0.0421063	-0.0970867	-0.086603	-0.024848	-0.0896949	-0.0108621	0.0402382	0.0114189	-0.0355754	0.0187643
Dpyd	-0.623899	-0.258818	0.294124	-0.250764	0.0286167	0.0526632	0.374444	0.0920536	0.0348929	-0.0383673	-0.0130759	-0.117352	-0.0701225	-0.189084	-0.215983	0.267255	-0.0189251	0.122247	0.166685	0.0379102	0.116449	-0.076862	0.00610057	-0.0407395	-0.0164427	-0.00315285	-0.0110115	0.0139545	-0.0208833
Mdm4	0.289157	-0.133536	0.123767	0.275521	0.02304	0.0942438	-0.251898	-0.503774	-0.218753	-0.0256817	0.0580637	-0.025274	0.0717278	0.0498336	0.295645	-0.0755405	0.0818113	-0.296908	0.0865828	0.068957	0.0700264	-0.274972	0.0574843	0.350203	-0.00193075	0.0137356	-0.0777487	-0.0779056	0.0392891
Mapk13	0.267774	-0.36185	-0.277737	-0.039379	0.386022	0.193922	-0.246811	-0.263197	-0.261732	0.380529	0.188347	-0.0950136	0.031618	0.128901	-0.0971542	-0.266232	0.0216056	-0.125891	-0.0953054	-0.0339148	-0.0290326	0.128639	-0.029423	0.00944356	-0.0111648	0.0035607	-0.0302138	0.0134042	7.93209e-06
Hsp90b1	0.57614	0.1444	-0.244641	0.305879	-0.367804	-0.0734054	-0.0559347	0.0277277	-0.0301465	0.203288	-0.0282798	-0.310252	-0.101893	0.329719	-0.0899799	0.000441144	-0.0112695	0.179993	-0.0129048	-0.152154	0.0767327	0.0783858	-0.0311984	0.112256	-0.0261633	-0.012573	0.0102118	-0.0167711	0.0085582
Ccl11	0.575971	0.270921	-0.153236	-0.410067	0.0241371	-0.0563538	0.169276	0.0480773	0.269785	-0.0118366	-0.00199584	0.0256294	0.240672	0.0546873	-0.154872	0.159709	-0.129244	-0.126748	-0.125156	0.232455	0.163441	0.0448053	0.0124051	0.171885	0.139704	0.0322831	0.0176897	-0.0501064	-0.0154225
Igsf10	-0.533596	-0.164881	0.18824	0.453225	-0.24933	0.107754	-0.0196994	-0.0371295	-0.144721	0.292603	0.163394	0.145143	-0.0118825	-0.200819	0.0196301	0.00957834	-0.125423	0.164567	0.180282	-0.201431	0.0769941	-0.0761828	-0.0988195	0.018941	-0.161702	0.0139392	0.0256347	0.107548	-0.0107885
2300002D11Rik	-0.517798	0.340614	0.0589676	-0.159123	0.433285	-0.0146855	0.0251162	-0.330752	0.0283361	-0.0215872	0.110294	0.021432	-0.149988	0.177832	-0.0319225	0.169016	-0.077591	-0.0877731	0.225284	-0.136543	-0.252719	-0.0433457	0.0735825	-0.176171	-0.0242787	0.00601315	0.0704049	0.0240505	-0.00354457
Tubb2a	0.717647	0.512435	0.0881274	0.0685712	-0.270624	0.108483	0.286281	0.0732314	0.103108	0.02026	-0.00287761	0.00793946	-0.00356907	-0.0133145	-0.0362821	-0.0798103	0.0707231	0.0376199	0.0620864	-0.046505	0.0104529	-0.00725623	0.0316021	-0.0464988	0.0363301	-0.0173074	0.0227538	-0.0238299	0.0121596
Fkbp14	0.746527	0.112575	0.469671	0.188073	-0.180109	0.254014	-0.00730914	-0.0865057	0.0110329	-0.0735787	-0.0432046	0.0375237	-0.109853	-0.094762	0.112218	0.0243807	0.0404583	0.00980693	-0.0359835	-0.119695	0.0626269	0.034016	0.0550198	0.0156282	0.00735391	-0.00717714	0.0051467	-0.0218667	0.014225
Ndrg2	-0.409584	0.300232	-0.387297	-0.449889	0.158355	0.266009	0.0891027	0.0445532	-0.119417	-0.131103	0.124715	0.0717947	-0.09947	-0.11629	0.141056	-0.0536132	0.0452588	0.0069316	0.0430938	-0.0119982	0.139959	0.199389	0.0678837	0.23642	-0.0228728	0.0533465	-0.0871261	0.118433	0.19148
Ahr	-0.318183	-0.536139	-0.00854383	0.163296	-0.259318	0.271494	0.163561	-0.0671916	-0.128289	-0.256186	0.00477654	0.144802	-0.0390002	-0.2519	-0.0271189	0.155191	0.158978	0.275402	-0.0264269	-0.0258466	-0.0439953	0.246164	-0.0550481	0.0631552	0.135715	-0.0811256	0.116989	0.053193	0.0769823
Fbln5	-0.495304	0.523826	0.299624	0.430962	0.0461289	-0.271315	-0.107598	-0.220464	-0.127691	-0.0254787	-0.0348235	-0.0772924	0.0167673	-0.027216	0.078121	0.0552745	-0.0692998	-0.113638	0.00190999	0.0137141	-0.0352793	-0.00672782	0.0735964	0.0574359	0.0557683	-0.00463845	0.0315418	0.0419769	0.0270876
Ripk3	0.760084	0.103649	0.0202295	-0.359479	0.116916	-0.0786441	0.156277	0.158986	0.166316	-0.229009	-0.0294564	-0.0132595	-0.0326514	-0.180163	-0.057257	-0.045942	-0.0037434	0.156675	0.138791	0.022846	-0.138786	0.0893793	-0.0262576	-0.0265138	0.129617	-0.0450193	-0.00270694	-0.0129975	-0.0169143
Fkbp4	0.343161	0.649604	-0.374808	-0.0901901	0.255635	0.22532	0.0461546	-0.0659719	-0.186882	-0.00113646	0.0361427	-0.0248736	-0.0808262	-0.200278	0.0219754	0.106028	0.169279	-0.0659015	0.0107565	-0.0864174	0.0494857	0.127659	0.13517	0.0436021	-0.0866426	0.0116335	-0.0173505	0.0431244	-0.0671976
Chrdl1	-0.802136	-0.16249	0.167728	0.065967	-0.0392264	-0.0915546	0.0503203	0.0359021	-0.169549	-0.359804	-0.077767	-0.0243479	0.0139111	0.0824486	-0.0763723	-0.00446029	0.23698	0.194257	0.0575992	0.0382604	0.0235013	-0.0306039	-0.00209232	0.0519668	0.0423804	-0.0294069	-0.024177	0.00755241	0.00922996
Rdm1	-0.854579	-0.154869	-0.212206	-0.00931323	-0.0181579	-0.204193	0.190987	-0.122398	-0.109141	0.0516956	-0.107888	-0.0472779	0.013576	0.0265309	-0.0545933	-0.0315678	-0.121612	-0.0155742	-0.116441	-0.153325	-0.00534846	-0.0820985	0.00249282	-0.0535902	-0.0928549	0.0473251	0.0228275	0.0255249	0.00244584
Trim25	0.539516	-0.0749163	-0.0196432	-0.333826	-0.276272	-0.0806198	0.304644	0.0548225	-0.115882	0.285606	-0.142088	-0.169965	-0.0404531	0.0424128	-0.282585	-0.00518232	0.0369076	0.308014	-0.0855005	0.118602	0.232918	-0.0171955	0.0885085	-0.0526899	0.0276327	-0.0267515	-0.0292834	-0.00402722	-0.018195
Ndufb5	0.413659	0.531531	-0.48481	0.0470616	0.210599	-0.0395157	-0.0639859	0.014751	-0.125571	0.114257	-0.0653344	0.0690941	-0.222073	0.168751	0.0868241	0.113569	-0.00333546	-0.0866369	0.091363	0.0476802	-0.017141	0.00116759	0.110675	0.0856098	0.198923	0.166052	0.0553083	-0.119687	0.0157273
Cd302	0.382634	-0.608333	0.20165	-0.168977	-0.350866	0.187919	0.0361684	0.00675844	-0.111684	-0.125013	0.0538714	-0.208654	0.00525058	-0.185937	-0.155426	-0.0653247	0.205298	-0.105156	0.205631	-0.077433	-0.00286608	0.0796738	-0.0156781	-0.0186387	-0.0790656	-0.0404182	0.0166096	0.00633402	0.018218
Gsta1	-0.694781	0.124974	0.100688	-0.505857	0.186879	0.292482	-0.126817	0.0292313	0.138853	0.0137239	0.109147	0.0692227	-0.0521916	-0.103364	-0.0889774	-0.0159773	0.0727505	-0.0295582	-0.0566655	0.12868	-0.00497315	-0.056673	0.0431104	-0.0641135	0.0580105	-0.00633708	-0.000694834	0.0109546	-0.0424803
A930037G23Rik	-0.263141	-0.452133	0.504736	-0.300103	-0.014974	0.296511	0.300775	0.236608	0.0941031	-0.105102	0.047063	-0.236686	0.14958	0.0327893	0.0048841	-0.0725959	-0.0878338	0.0165052	0.0497604	0.0197932	-0.0303425	0.0704262	0.0990931	0.0487932	-0.0842173	0.0485233	0.0350413	-0.0198058	-0.00608712
Hnrpa2b1	0.393258	-0.579565	0.200136	-0.0925473	-0.10911	-0.0150538	0.3474	0.124528	-0.20934	0.114093	-0.13571	0.182828	0.156816	-0.0610187	-0.0838871	0.087684	-0.165857	0.192905	0.212531	-0.0980333	0.161569	0.0341989	-0.0559672	-0.0380628	-0.0858401	-0.0228365	-0.0255057	-0.0296173	0.00313337
Klra8	0.0722988	-0.0321632	0.310147	0.0351186	-0.291298	0.116155	0.117466	-0.257125	0.516948	0.11749	0.00547116	0.217218	0.156132	0.174856	-0.0681365	-0.0356318	0.0992881	-0.189537	0.317471	0.128519	0.0495649	0.119447	0.197488	0.118652	0.108763	0.0411731	0.219532	0.181408	0.0376772
Atad2	0.707046	0.111863	0.19784	0.259135	-0.078042	-0.312854	-0.257836	0.133969	-0.0493338	0.0700765	0.0161615	0.176951	-0.158851	-0.0126164	0.195649	0.0732303	-0.0280344	0.10986	-0.0845409	-0.0382295	-0.12639	0.0510779	0.107649	-0.163829	-0.00501311	-0.0379557	0.0450585	0.00599617	0.0540924
6030487A22Rik	-0.380058	-0.119446	0.420206	0.044876	-0.254629	-0.330999	0.171789	-0.3046	0.171519	-0.101018	-0.0212678	-0.123387	-0.125663	0.0597111	-0.37408	0.0849332	0.196173	-0.00054175	-0.25446	0.0614784	0.0415513	0.0951603	0.0150774	-0.0990095	-0.0189901	0.0464341	0.0747668	0.0706399	-0.0573075
Fdps	0.638522	0.138815	0.0554565	-0.139448	-0.0482614	0.373112	-0.0078487	0.179447	-0.211275	0.139692	-0.0272792	-0.00950229	0.151982	0.137591	-0.424609	-0.0229534	-0.157634	-0.183171	0.10596	0.0127713	-0.0349467	0.0720562	0.0532865	-0.0177748	0.071225	-0.0259335	0.0151924	0.0317378	0.0501633
9030607L17Rik	-0.213534	-0.528776	0.382665	-0.144011	0.111231	0.182499	0.207222	0.25609	-0.0744599	0.100414	-0.0887718	-0.114675	0.342875	0.0081086	0.0378235	0.0817451	-0.113735	-0.0365556	0.0827911	0.260823	-0.0803162	0.00748729	-0.0275228	0.0685162	-0.151953	-0.0620652	0.228025	-0.0712554	-0.0767999
Sertad1	0.299878	0.453913	0.569514	0.0927488	0.290324	-0.115673	-0.0671217	0.0702152	-0.122754	0.0214085	0.0863174	-0.0848156	-0.00280359	0.0135266	-0.0660704	-0.198985	0.076874	-0.0339098	-0.00419264	0.206168	0.0642773	-0.134042	-0.241073	0.0830846	-0.00395978	-0.0583154	0.0256374	-0.0229563	-0.21991
Gas6	-0.603244	-0.170493	-0.0975253	0.186367	0.313312	-0.346021	-0.0227943	-0.282795	0.066468	0.010245	-0.0057807	-0.0511289	0.28945	0.271299	-0.0510732	0.22121	0.0895071	-0.00395988	0.0515378	-0.026593	0.0464039	-0.0158281	0.12769	-0.114925	-0.0384682	-0.00933276	0.0385329	0.00725498	-0.0434557
Ppp1r14b	0.557143	0.0416122	-0.125811	0.467826	0.365625	0.287099	-0.0165757	-0.087319	0.272573	-0.0419816	-0.0798371	-0.131189	0.0369812	-0.0310271	0.224674	-0.102271	-0.030538	-0.0514436	-0.217461	-0.0713863	-0.0277794	-0.00563847	-0.0423146	-0.0369125	-0.0148048	0.0718066	-0.0160309	0.024938	-0.00880993
9930017N22Rik	-0.618629	-0.348319	-0.145832	-0.0427554	-0.136824	0.0105183	-0.17697	-0.118802	-0.0904793	-0.0961212	0.0361684	0.249242	9.61177e-05	-0.200036	0.00495721	-0.232608	-0.142823	0.316528	-0.0134667	-0.131196	-0.250287	-0.0211296	-0.129874	0.0115341	-0.0988459	0.0696055	0.000305088	0.0161655	-0.0257489
Nfkbil2	0.323329	-0.640283	-0.210335	0.207561	0.394143	0.24533	-0.0707314	-0.143115	0.132686	0.117679	0.147144	-0.192614	0.0182758	0.00791599	-0.00507778	-0.148596	-0.0200169	0.0684964	0.0389589	0.133908	-0.022361	0.0276229	-0.113879	0.0226049	-0.0612848	0.0239594	-0.0249239	-0.00519554	-0.0135359
4933430H15Rik	-0.0646874	-0.383817	-0.0708857	-0.57557	0.0854614	0.19121	0.015645	0.27405	0.0559847	0.141438	0.0549241	0.0972419	0.0633008	0.17529	0.124103	0.0867245	-0.197792	0.0470836	-0.271762	-0.0961068	-0.0771512	0.129623	0.0661498	0.0925943	0.116955	-0.339997	0.0570226	0.00889318	-0.0835036
Sfpq	0.610892	0.481443	0.169944	-0.072788	-0.479643	-0.0729488	-0.0912376	-0.00643231	0.0500761	0.0430643	0.182525	0.10265	0.0164001	0.00539902	-0.0843765	-0.0416152	-0.0533935	-0.0416294	-0.110509	-0.0446423	-0.00372604	-0.103108	-0.077122	-0.121051	0.0529597	-0.0468525	0.0396314	-0.0485423	0.0278251
Calcr	-0.542033	-0.528005	0.120134	0.299156	-0.0466695	-0.153371	0.10467	-0.327922	0.115976	-0.133272	0.120862	-0.113305	-0.0183359	-0.192619	0.00503451	-0.0336112	0.0415962	-0.0906671	-0.031386	-0.0764154	-0.130528	-0.130302	0.0212065	0.00754942	0.162359	-0.0575593	-0.0102069	-0.0214853	0.0225001
H13	0.6523	0.234381	-0.3134	0.248261	0.135929	0.102057	0.15986	-0.0563573	-0.0613551	0.151807	0.0371883	-0.0298079	0.224992	-0.139049	-0.198429	-0.27434	0.173513	0.00908975	0.132256	-0.0602029	0.00177122	-0.0974203	0.121237	0.0298363	-0.0538492	-0.0338653	-0.0143086	-0.0733975	0.0489241
Fignl1	0.512712	-0.104379	0.240285	0.408334	-0.0171246	0.21668	-0.508403	0.114205	0.00255045	0.137449	-0.0175808	-0.101054	-0.163954	-0.0917326	0.160882	0.0356355	0.0159559	0.0925224	-0.0718705	0.145972	-0.174934	0.0048201	0.0567256	-0.142096	-0.0113134	0.000962976	-0.0225803	0.03404	0.00317386
Tuba6	0.748832	0.212824	-0.182702	-0.33929	0.0779785	-0.0534359	-0.020531	-0.305685	-0.0509305	0.215465	-0.0611336	0.0532016	-0.0726549	0.0011215	0.0744871	-0.0955176	-0.0735398	0.161804	-0.0842199	-0.0135305	-0.115182	0.0636601	-0.0476259	-0.0124866	0.0289441	0.0845779	0.0223759	0.000461486	0.00439065
Ptgs1	0.449892	-0.459389	-0.253892	-0.105633	0.331677	-0.143408	-0.0914979	-0.0786593	-0.243287	0.202428	0.232589	0.103197	-0.132432	0.0706884	-0.0087826	-0.134409	-0.264311	0.204801	0.0619946	-0.0147647	0.0861328	0.166143	-0.0628043	0.0168505	-0.0580651	0.023074	-0.00663052	-0.0337555	-0.00319686
Pcsk5	0.0527995	-0.319042	0.509874	0.507266	-0.179075	0.0906359	0.0896971	0.0819443	0.246255	0.0229904	-0.0579462	-0.0907496	0.0480565	0.108491	-0.171246	-0.162176	-0.196393	0.0192368	-0.0512681	-0.0341953	0.18587	0.129346	0.256498	0.0639028	0.051182	-0.0874431	-0.00778449	-0.0529816	0.0599759
E130012A19Rik	-0.602111	0.0724338	0.377952	-0.183347	0.450675	-0.162102	0.0218901	-0.244254	0.0509824	-0.120065	0.0614258	0.269254	0.00433472	-0.0343566	-0.165704	0.0464012	-0.0380048	-0.11948	0.0415213	0.0326599	0.0013146	-0.0392139	0.108476	-0.0131125	0.0921347	-0.0224846	0.000982119	0.0267387	-0.0208021
Pycard	0.315165	-0.747484	-0.31512	-0.0663749	0.277702	0.0420682	0.0722022	0.234456	0.0751217	-0.0210357	0.0563822	0.121827	-0.0449296	0.0299184	-0.14637	-0.172312	-0.0383159	0.0366693	-0.0523183	0.025346	-0.0235128	0.0307486	-0.0757155	-0.0786108	-0.000740095	-0.0117455	-0.0286318	-0.000225764	0.0215201
Pdyn	0.756344	-0.0558763	0.297693	0.103222	-0.115666	-0.119313	-0.127982	-0.0657357	-0.0730543	0.0630666	-0.189987	-0.00509762	-0.292619	-0.0310881	0.0670023	0.0838755	0.0210585	-0.268641	-0.0461086	-0.0904477	0.00637398	-0.00542162	-0.0655108	0.202662	-0.0639339	0.00726914	-0.0312677	0.0133489	0.00545569
G431001E03Rik	0.721578	0.29014	-0.0224074	0.0995538	0.0250585	-0.235974	-0.29721	-0.0625816	-0.0257209	0.0310663	-0.0770736	0.30284	-0.0344874	0.0704853	-0.060416	-0.0883381	0.0646116	-0.00292775	-0.158761	0.0265418	-0.00763613	0.0898251	-0.0391396	0.276365	-0.00135364	0.0315908	-0.0246278	0.0299302	0.0254357
Vcam1	0.67787	-0.0356047	-0.189085	0.538297	-0.150275	-0.314776	0.0544122	0.0622433	-0.0345103	0.0901983	0.00999015	-0.115765	0.0305484	0.0817825	0.141831	-0.0572806	0.00759434	0.10232	-0.0708269	-0.0953349	0.0169666	0.0392053	-0.0520172	0.0331868	-0.0262269	-0.00353399	-0.00364529	0.00844815	0.017618
Fkbp10	0.551623	-0.170718	0.530531	0.284682	0.15758	-0.0422996	-0.212948	-0.240365	-0.0764153	-0.0866295	-0.173921	0.0294939	-0.113102	-0.121074	0.098928	0.129662	-0.0431628	0.097728	-0.196608	-0.112811	-0.0579531	-0.013227	0.0396738	0.0550047	0.00417971	0.0626293	-0.0281915	0.00905805	-0.00780309
Usp2	-0.214081	0.0620758	0.111741	-0.56359	0.303677	-0.0159265	-0.026165	-0.0371319	0.343971	0.177854	-0.152007	-0.0607611	0.0698378	-0.0411423	-0.0715843	0.0520728	0.120429	0.0953515	0.105497	-0.2348	0.27496	-0.125697	0.0538766	-0.00665032	0.122807	-0.305729	-0.190779	0.0518911	0.0515865
Mcm3	0.735998	0.0301346	0.0726367	0.469217	0.160935	0.000765488	-0.198776	0.0078679	0.324648	0.00829148	-0.0717252	0.0892425	0.0280579	-0.0028389	0.00980356	0.0820522	0.111445	-0.0100566	-0.00136549	0.120826	0.00448758	0.0204694	-0.0244656	0.0549076	-0.0890263	-0.0250292	-0.0104261	0.0211824	0.00114073
Tbx1	-0.523286	0.0331938	-0.402866	-0.506772	-0.0522603	0.110135	-0.0753351	-0.179228	0.166746	0.270635	0.0137714	0.124285	-0.148606	-0.0718398	0.0627524	-0.0296339	-0.146132	-0.00940491	-0.138565	-0.146451	0.0187086	-0.0315089	0.0480894	-0.0579519	0.181267	-0.0310428	-0.0397957	0.00616369	-0.000521142
Mapkap1	0.408671	0.237158	-0.544591	0.194344	0.0573117	0.103836	0.403814	-0.0187857	0.0158192	-0.0390455	0.0420496	0.110974	-0.206145	-0.124555	-0.0182143	0.014501	0.137313	0.218062	0.113796	0.231123	-0.0767752	-0.0191515	-0.0259941	0.0315592	-0.207127	0.023749	0.00666252	-0.01662	-0.0775089
Luc7l2	0.0310243	-0.566506	0.448386	-0.191722	-0.118099	0.0517988	0.374179	-0.022071	0.283817	0.248627	-0.0612227	-0.08116	0.118044	0.0940259	0.138021	-0.0379099	0.00976476	-0.135861	-0.0043221	0.107145	-0.206367	-0.0888601	0.035068	0.00449456	0.0294545	0.0437303	0.0185389	-0.022359	0.0424217
B4galt1	0.427225	-0.0264568	0.269375	0.254687	0.267562	-0.141277	0.131099	-0.599411	-0.0530329	0.0419758	-0.219454	-0.278305	0.0609357	-0.0120178	0.034577	-0.0025935	-0.0987761	-0.0552871	0.0387735	0.213044	0.0917229	-0.00411435	0.0228765	-0.0240984	0.00562837	0.075106	0.0295269	0.0105477	-0.0133753
LOC667984	0.568964	0.157693	0.208506	0.436765	-0.137526	-0.155793	-0.070583	-0.268696	-0.0424016	-0.14009	-0.272202	0.0788207	0.0669218	0.18153	-0.00452225	0.209946	0.048919	0.19484	0.0766458	0.103933	-0.177772	-0.042677	0.0694505	-0.127096	-0.00776238	0.0281958	0.0104233	0.00194045	0.033918
Klhdc8b	-0.0888218	-0.454969	0.559719	-0.156695	0.286593	0.120467	0.240338	0.131793	-0.156838	0.0794751	-0.0769932	0.0179246	0.227093	0.0766062	0.364814	-0.0475477	0.092233	0.0228329	-0.105914	0.0474332	-0.0169826	0.0797711	0.0676686	0.0543535	-0.027041	0.0723549	-0.0273496	0.0390584	0.0249422
Malt1	0.521306	-0.590276	-0.115959	0.00777196	0.083871	-0.451238	-0.00777794	-0.0226295	0.122893	-0.0151722	0.138032	0.217869	0.0480521	0.0748977	-0.0724858	0.0743756	0.147108	0.0990135	0.00660221	-0.00109404	0.0204849	0.122989	0.00984314	0.0676013	-0.0440741	-0.0254055	0.00518313	-0.0015264	-0.0144389
Es22	-0.732757	-0.0474041	0.0508669	-0.336515	0.0216644	0.00617738	-0.306956	-0.0851581	0.071626	-0.195167	-0.172896	0.173458	-0.121694	0.256989	0.0278612	0.167774	-0.0310502	-0.00267014	-0.0684383	0.0821877	-0.00251137	-0.0698501	0.0841468	0.0724058	0.00605962	0.00741682	-0.0156765	-0.000278248	0.00860402
	-0.262276	-0.425096	0.432	0.155955	-0.0703408	-0.11021	-0.326123	0.0412283	0.440604	0.17434	-0.024694	-0.167645	-0.0522021	-0.0274432	0.177283	-0.164878	0.115199	0.0352555	0.0682486	0.0713589	0.10455	-0.0857482	-0.157489	-0.0680664	0.123091	-0.0856375	-0.0456539	-0.00485872	0.0499996
Ifitm2	0.479143	0.296898	0.143552	0.0273928	-0.17067	0.168109	-0.264635	0.199075	0.0128492	-0.225178	-0.032695	-0.453174	-0.0821228	-0.0796719	-0.224023	-0.0401054	0.182481	-0.17905	0.0425435	-0.00170933	-0.0531904	0.0760162	-0.0596876	0.288952	0.072054	-0.0378799	-0.0435864	0.0175666	-0.00173071
Sqle	0.397146	-0.58899	0.0131009	-0.355697	-0.0418384	0.357713	-0.0627349	0.00169165	-0.10955	0.233976	-0.0145179	0.0942969	0.019223	-0.00887056	-0.185254	0.0308961	-0.162825	-0.271283	-0.0545718	0.0058038	-0.0736984	0.0054009	-0.00827193	-0.0882746	-0.0437114	0.058098	0.0279284	-0.0112461	0.0286997
Cdc42ep3	-0.755149	-0.332124	-0.0304952	0.133821	-0.0736697	-0.231257	-0.0792024	-0.284151	-0.0353148	0.165518	-0.0678591	-0.178012	0.0728056	0.0195181	-0.0715639	-0.0150422	0.0437275	-0.0351701	0.0586743	0.142482	-0.0746892	-0.138208	-0.0483252	0.0298875	-0.149801	0.0189554	0.0240165	0.0227807	-0.00464434
Sfrp1	0.459241	-0.468845	-0.0850692	0.212027	0.262694	-0.188401	-0.225476	-0.369953	-0.215699	0.0486783	-0.0725486	0.0502231	-0.118428	-0.051274	-0.00011418	-0.041354	0.0447948	0.0219745	0.067481	0.194974	0.0825845	-0.14416	0.203949	0.0652767	0.0824174	0.112476	0.0772266	0.0758183	0.0128045
BC037034	0.342995	-0.618385	0.0703047	-0.14709	0.0655006	0.178559	0.168633	0.220192	0.0624933	0.216357	0.130295	-0.353394	-0.266286	0.021907	-0.105588	0.0731581	0.164252	-0.167431	-0.0297376	-0.0603362	-0.0172669	-0.0434854	0.00368236	-0.000521059	-0.118636	-0.0590749	-0.0175278	-0.0129424	0.00579982
Plk3	0.342748	0.039777	0.489054	-0.0803039	0.292335	-0.0303743	-0.21308	-0.10826	-0.208257	0.500482	0.205039	0.0537069	-0.164566	-0.0489547	-0.199083	0.0696416	-0.0505375	-0.119831	0.088029	-0.0122457	0.182142	0.0780905	0.0604098	0.0490879	-0.0383897	-0.0763203	-0.0396939	0.00522616	-0.00515542
Arpc1b	0.726137	-0.0126779	-0.016682	0.0260579	0.318838	-0.208607	0.0148987	0.34446	-0.147523	0.0299284	-0.00704984	0.187166	-0.0260464	0.125353	-0.0498823	-0.0888205	-0.0822562	0.0148396	-0.154743	0.0748197	-0.0302023	0.0498644	-0.138784	0.214044	0.117879	0.000630463	-0.0551588	0.0128471	0.0306726
Creld2	0.671424	0.393195	-0.327165	0.0164927	-0.0237726	0.144714	0.182296	-0.129799	0.211039	0.0818948	-0.138242	-0.0193283	0.0743971	0.0794513	0.0907214	-0.0233525	-0.0226869	0.104414	-0.145657	-0.271927	0.0914345	0.0712504	0.027962	-0.00908547	0.0148848	0.0491889	-0.00114475	-0.0268222	-0.00998038
Fkbp5	0.499891	0.561342	0.0279057	-0.421251	0.126324	-0.0922261	-0.0359927	0.111363	-0.100397	-0.146045	0.0170105	0.16051	-0.0133399	-0.0672246	-0.100194	-0.166671	0.0743774	0.00565033	0.0510467	0.0626776	0.10079	-0.238836	-0.142273	0.0713178	-0.0803864	-0.000768115	0.00282719	-0.0713409	0.0494811
Acss1	-0.507246	-0.10709	-0.456475	0.0508535	-0.217272	0.0263446	-0.230077	-0.135369	0.172131	0.294104	0.154272	0.140043	-0.170732	0.379853	0.0324888	-0.0530617	0.0147373	-0.0392542	-0.0191643	0.147537	-0.00351185	-0.0889252	0.00614513	0.0749703	0.144505	-0.0589424	-0.0374856	-0.0290154	0.0139923
Gata3	-0.549891	-0.300639	0.246525	0.267186	0.00331668	0.0889761	-0.198203	0.26252	-0.0495021	0.0516851	0.254261	0.0572353	-0.220062	-0.0842588	0.0323459	-0.119747	0.289593	0.157776	-0.00749472	-0.0412037	0.12489	-0.041912	0.163677	-0.17113	-0.0180241	0.098999	0.107337	-0.0921585	0.0300713
Calr	0.684368	0.436966	-0.352381	-0.0151215	-0.0571175	0.117217	0.179826	-0.136799	0.104795	-0.0209669	0.0214121	0.0062638	-0.00348209	-0.0448653	-0.0169175	-0.216671	0.0409066	0.0493378	0.169566	-0.0791991	-0.00397455	-0.0962428	0.11944	0.033561	-0.0311207	-0.0552076	9.24335e-05	-0.121411	0.0671521
Plekha6	-0.594446	-0.245419	0.489403	-0.323272	-0.1873	0.161489	-0.131989	0.0646822	0.0573647	-0.109284	0.0445627	-0.0188618	-0.0999439	-0.169919	0.100422	0.169252	-0.0231172	-0.0585868	0.00824755	0.0547676	-0.000834357	0.167638	-0.0811206	-0.0682333	0.0631201	0.0052023	0.0359484	0.0912236	-0.0667242
Gria1	0.136856	0.317909	-0.223685	0.212512	0.394133	0.264466	0.131259	-0.257665	-0.522054	-0.118703	-0.0508468	0.128072	0.0996969	-0.144907	-0.178611	0.0900681	0.195185	0.0611449	-0.00603942	0.047051	0.109936	-0.0441703	-0.149106	-0.104829	-0.00508743	0.0394576	-0.0421544	0.049883	-0.0483897
Mdh1	-0.155805	0.466251	-0.671786	-0.211587	-0.0587711	0.0743894	-0.0690135	0.145347	0.0784608	0.0369593	-0.135267	-0.10372	0.0755204	-0.0440986	-0.0227567	0.128261	-0.116096	-0.0828688	0.0594571	0.159278	-0.0119658	-0.118027	-0.0902837	-0.120565	-0.0781762	0.165808	-0.189323	0.0999872	0.0272762
Plxna2	0.220263	0.359384	-0.151213	-0.425275	-0.143483	-0.324247	-0.138119	-0.358945	0.0240791	-0.0595597	0.139402	0.0636111	0.0231789	-0.134678	-0.032781	-0.157242	-0.0767164	0.119499	-0.0823588	0.0310788	-0.128385	-0.131147	-0.0564625	-0.00560037	-0.272299	-0.28518	0.123301	0.0381915	0.189547
Ramp1	-0.649448	-0.472141	-0.115787	-0.31297	0.111654	0.17398	0.050794	-0.194809	0.0252994	0.230225	-0.0610904	0.0274438	-0.139237	-0.0779793	0.0748149	-0.0553958	-0.0682097	-0.0197427	-0.100001	0.0281167	0.0176851	-0.109677	-0.0450102	-0.110213	-0.131613	0.0795616	-0.0126072	0.0419001	-0.0223572
	0.790332	-0.0909297	0.220136	0.10041	0.089542	0.423126	0.202555	-0.0443028	-0.0282312	-0.0207149	-0.0130222	0.147364	-0.087852	0.0436566	-0.0844002	-0.104978	0.0503952	0.0255268	-0.0880687	-0.0990184	0.0257774	0.0347279	0.0286921	-0.0517586	0.0209402	0.0152594	-0.0101609	0.00483041	0.0267942
Dnase2a	-0.662218	-0.403947	-0.14837	0.349624	0.0814467	0.109308	-0.228372	-0.0520843	0.0334587	0.150837	0.00898711	0.149103	-0.0408849	0.152932	0.117263	-0.0526297	-0.0700775	-0.156438	-0.104312	-0.0340439	0.140396	-0.0378309	0.0220181	-0.0182554	-0.169803	-0.0169828	-0.00238756	0.0168642	0.0059941
Pdia4	0.483904	0.346205	0.018551	0.406995	-0.369737	-0.128288	-0.246233	0.169285	0.174757	0.125187	-0.0533817	-0.00535511	0.113254	0.106577	-0.210267	0.16362	-0.263836	0.0120831	-0.0827227	-0.0477898	0.0162055	0.00351305	0.0681615	0.0866937	-0.0300874	-0.00872404	0.0299168	0.00728274	-0.00564719
Slc35f3	-0.404066	-0.316153	-0.0690395	0.5875	0.0286056	0.0542539	-0.0446473	-0.12907	0.289758	0.095896	-0.0104205	0.0678512	-0.038974	0.0284059	-0.252005	-0.0626992	-0.126806	0.0443848	0.198807	-0.335776	-0.000246455	-0.0278363	-0.0709632	0.065977	0.0555742	-0.112359	-0.0110657	-0.000497742	0.0221461
Crem	0.164567	0.649771	0.148089	-0.209961	-0.360965	-0.325211	0.00336207	0.0548777	0.0473429	0.103732	0.144724	-0.110709	0.125036	0.149538	0.200219	-0.137393	-0.123472	0.00092027	-0.00429115	0.0528304	-0.0327938	0.0867524	-0.108498	-0.0529571	-0.0614832	-0.211651	-0.0468445	0.100465	0.0189765
Kazald1	-0.784725	-0.389716	0.178943	0.0712292	0.0812685	-0.0616564	-0.159213	-0.0149264	-0.224155	-0.121574	0.186053	-0.160671	-0.0411929	-0.116581	0.0151037	-0.0251433	-0.0937855	-0.041827	0.0204629	0.038685	-0.0410785	-0.0187212	0.0038363	0.0405642	0.0197394	-0.00783752	-0.00414815	0.030182	0.0106599
Smpdl3a	-0.62183	-0.0312263	0.0870821	-0.285172	0.0628761	0.190268	0.13662	-0.158514	-0.368031	0.0132104	-0.134733	-0.328803	-0.167358	-0.113119	-0.00139683	-0.174066	0.159312	0.125264	-0.0285313	0.149115	0.108188	0.0119961	0.0261825	-0.0896108	0.131331	0.0221116	-0.063054	-0.00620176	-0.00848588
LOC433016	0.461427	0.139023	-0.435357	0.405725	0.0478758	-0.131184	0.263753	-0.208137	-0.125873	0.0476111	-0.242772	0.140892	0.00655928	0.218379	-0.144089	-0.0217196	-0.0201453	-0.0441576	-0.0114374	-0.0480612	-0.0595551	0.0793423	-0.0582037	-0.0183011	-0.0138395	-0.0393635	-0.00753609	0.301142	-0.0671664
Retnlb	0.692805	-0.099175	0.00550413	-0.0917516	-0.112703	0.000369454	-0.142588	-0.0153428	0.405316	0.178065	0.129268	0.0805047	0.146829	-0.0745975	-0.0378507	0.278408	0.0312885	-0.0896332	0.11765	-0.166909	-0.204587	0.00670038	0.0772957	-0.12271	-0.145631	0.00643397	0.050506	-0.0429565	-0.0626761
H2-DMb1	0.170729	-0.485447	-0.115366	0.216616	-0.0895129	-0.0808063	-0.266575	-0.238678	-0.12885	0.240935	0.20306	-0.502777	0.198583	0.0200217	-0.08809	-0.140491	0.228754	-0.028306	-0.0123545	-0.110342	0.0394155	0.0909499	-0.0200065	0.134709	-0.0460579	-0.00433516	0.00532398	0.0167454	-0.0103082
Edg2	0.77749	0.132242	0.0871551	0.293625	0.139823	-0.113556	-0.327094	0.0983695	0.102657	0.158669	-0.0400074	0.195301	-0.0598666	-0.024828	0.0383377	-0.0156697	0.060118	-0.146971	-0.0609804	-0.0386403	0.0246225	0.0957593	0.021179	0.0135268	-0.093559	-0.047457	-0.0116997	0.0286425	0.0304581
D9Ertd280e	-0.303908	-0.402039	-0.315045	0.426448	0.200759	0.37418	0.0997588	-0.123213	0.00805348	0.0178518	-0.0942182	0.0267635	-0.0715221	0.0822023	-0.0401088	0.112358	0.0432738	-0.0993136	-0.0651512	-0.0672712	0.195394	0.134088	-0.28498	-0.147398	0.0870261	-0.0836616	0.100041	0.0503583	0.129002
Picalm	0.609623	0.527546	0.251826	-0.151536	-0.268439	-0.0447263	-0.0344355	0.224561	-0.168694	-0.110408	0.12257	0.0171815	0.0655753	0.0972074	0.0909795	0.0177728	0.147099	0.0563124	0.038696	0.0690958	0.0366681	0.114647	0.0188455	0.0366101	-0.100323	0.00204282	0.04817	-0.0058993	0.00221027
Tmem109	-0.626684	0.145303	-0.207161	0.171212	-0.442769	0.0475699	-0.00519554	0.00236875	-0.305388	0.0959626	0.0717307	0.180293	0.116693	-0.0430062	0.0363749	-0.184549	-0.0624986	0.0224515	-0.0149084	-0.310219	-0.0873482	-0.0158824	-0.0272709	0.0208386	-0.0880532	0.00804035	0.0309649	0.0768751	0.000609611
Dleu8	0.149216	-0.365766	0.264431	0.0591553	0.487582	0.103302	0.000260399	-0.153559	0.500359	-0.0999041	0.0714917	0.0713708	0.0242132	-0.089927	0.190888	-0.0468426	0.109412	-0.0471538	-0.154255	-0.0558773	-0.00911218	0.0255675	0.100327	-0.0386261	0.0309128	0.218986	-0.255858	0.091555	0.0672765
Bmpr2	-0.233508	-0.0637279	0.578483	-0.121701	-0.409623	0.250339	-0.117558	0.067208	0.16141	-0.0598094	-0.0499534	-0.0274172	-0.136288	-0.209474	0.00248234	-0.178917	-0.079412	-0.142197	-0.2028	0.0851462	0.205254	0.126537	-0.125587	-0.0118552	-0.082041	0.0998867	0.00724483	-0.218457	0.0487009
Clock	0.0818277	0.323868	-0.216358	0.178491	-0.547034	-0.0671363	0.156981	-0.310326	-0.341178	0.0332826	0.135139	0.0963267	-0.103285	0.054177	-0.113624	0.0456348	-0.00151113	0.0786324	0.0468806	0.21854	-0.0813544	-0.16005	-0.0766554	-0.0861709	-0.14137	0.22053	-0.195292	0.0201231	0.050559
Zfp704	-0.698935	-0.279156	0.0655958	0.00562589	-0.061746	0.197276	-0.254297	-0.0954725	-0.0274022	0.214716	-0.0782015	0.302288	0.199976	0.0845127	-0.0686558	0.034112	0.146094	0.0400223	-0.10615	0.02169	0.0277409	-0.0718631	0.170604	-0.179498	-0.112241	-0.00343122	-0.00327636	0.0234704	-0.0155841
Tspan1	-0.18029	-0.0160623	-0.527324	-0.500315	-0.165923	0.042182	-0.455057	-0.196519	-0.0820638	0.00443401	0.139487	0.0172402	0.0196885	-0.0703197	-0.0264014	0.252912	-0.0617647	-0.0709323	0.0217526	0.0875128	0.00307687	-0.0838981	-0.0657654	0.00340729	0.173129	-0.0470726	-0.0443659	-0.0411456	-0.0559437
Gtl2	-0.0868754	-0.347104	0.18118	-0.304954	0.154945	0.367309	0.259777	0.232691	0.0901621	0.0328837	0.127555	-0.297116	0.159812	-0.0268966	0.0505096	0.368487	-0.0589328	0.102402	-0.249089	0.113305	-0.0243981	-0.00790535	-0.0298091	0.0680888	-0.202224	-0.174947	0.0525513	0.0970707	0.0923551
Hba-a1	-0.39867	0.305493	-0.17697	0.382152	0.198865	0.185863	-0.289621	-0.0831324	-0.0113852	-0.334705	-0.314551	-0.17524	0.0347186	-0.0265726	-0.0714583	-0.0715321	0.182136	-0.0100431	0.117771	-0.0400389	0.0560663	0.0573908	-0.127543	0.0379278	-0.0374493	-0.188446	0.182713	-0.0579317	-0.0707579
Donson	0.554476	-0.221411	0.222321	0.0321772	0.194475	-0.485642	0.322297	0.00292347	0.159646	-0.0290602	0.172548	0.183821	-0.0909557	-0.123907	0.204548	0.183743	-0.0809948	0.021822	0.080252	-0.0538094	0.069492	0.0235343	0.00725913	-0.0362868	-0.0376523	-0.0301806	0.0129085	-0.0221578	-0.0169056
Col18a1	0.726358	0.197572	-0.172531	0.26544	0.404925	-0.0925605	-0.0380613	0.113499	0.121524	0.053748	-0.0699318	-0.174885	0.116938	-0.0288691	0.0928151	0.038753	-0.0944386	-0.159474	0.0934722	-0.0151303	0.0318776	0.11235	-0.0873093	-0.0172791	0.00820169	-0.0470759	-0.0159155	0.0110711	0.0314503
AW986112	-0.141192	-0.648312	0.383017	0.0230826	0.00766999	0.318752	0.243729	0.0380219	0.0995757	0.191283	-0.133375	-0.0152267	0.238417	-0.0593577	0.0401521	0.0454291	-0.165123	0.0423872	-0.130928	-0.0677564	-0.0644738	-0.00279216	0.0551832	0.0700595	0.00994714	-0.0847341	0.192189	-0.0973705	-0.0695218
Casp4	0.0798206	-0.697041	-0.509947	0.0990081	0.00289189	-0.125916	-0.160175	-0.0961959	-0.140595	-0.131822	-0.121899	0.0374782	-0.0175599	-0.00979368	-0.00449097	-0.0867861	0.00741285	0.00851173	0.232578	-0.0734583	0.0141084	-0.0933003	0.127463	0.111146	-0.0040018	0.0893812	0.111283	0.0866427	0.0275785
D4Wsu114e	-0.160326	-0.604198	-0.0895531	-0.123273	0.120734	-0.0806929	0.053448	0.31879	0.294391	0.192385	0.0400589	0.163104	0.0904433	0.155032	-0.0930412	-0.180325	-0.21472	-0.0207738	-0.110847	0.0269998	-0.170277	0.0594446	0.0528897	0.0757422	-0.0148836	-0.202873	0.281932	-0.112094	-0.0336844
Plxna2	0.322784	0.34291	-0.051332	-0.338074	0.0222295	-0.357353	-0.241735	-0.299565	-0.203848	-0.367412	0.0267099	-0.0277677	-0.0133433	0.0804847	-0.141911	-0.041998	-0.204164	-0.089964	0.042651	0.0248246	-0.14561	-0.17378	-0.0353503	-0.00247863	-0.20507	-0.168697	-0.0176717	0.0212266	0.0468078
Dnajb11	0.598944	0.0955393	-0.10485	0.277629	-0.418925	0.104895	-0.20097	0.328103	0.201462	-0.0527017	-0.170584	-0.152001	-0.26681	0.0660678	0.129201	0.0569001	0.0147982	-0.0413758	-0.0622142	-0.0705107	-0.0229579	0.00226787	-0.0292641	0.0173822	-0.0469822	-0.0412474	-0.0233621	-0.0191871	0.0344784
Sesn3	-0.438409	-0.0562475	-0.277792	0.526676	0.0234637	0.0886378	0.273543	0.126248	-0.0870962	0.0641419	-0.381436	-0.0582218	-0.212038	0.0369282	0.233899	-0.0839903	-0.0671936	0.201136	-0.0559121	-0.00480069	-0.069685	0.0170487	0.05889	0.0554102	-0.124618	0.0717048	-0.0318297	0.0268625	-0.00503142
Wbp5	0.478779	-0.117559	0.280122	0.167434	-0.111596	0.181436	-0.29662	-0.0621083	-0.0909016	0.353613	0.198088	-0.100723	-0.166349	0.367044	-0.129601	0.193606	0.193576	0.216968	0.0557208	-0.061324	-0.116555	-0.058443	0.0388366	-0.00838291	-0.0590441	-0.00167055	-0.00718629	0.0172338	-0.0065705
1110003O08Rik	-0.663858	0.148005	-0.313105	-0.451171	0.300725	-0.0634356	-0.125963	-0.0147116	-0.040451	-0.0115949	-0.0231765	0.00526533	-0.252731	0.104315	0.159029	-0.0206423	0.0348531	0.0356747	-0.040075	-0.0878182	0.0887353	0.0243152	0.00257246	-0.0127839	0.0309082	0.00734281	-0.0233238	0.0209639	-0.00373821
Mcm4	0.507255	-0.245966	0.482215	0.0581188	-0.162514	0.102743	-0.219134	-0.222382	-0.0557926	-0.103677	0.0012951	-0.117646	-0.411165	-0.0951454	-0.125858	0.00943294	-0.063376	0.0059031	0.13519	0.162432	0.106652	0.122251	0.0957519	0.0111949	0.0255279	-0.059193	0.0187963	-0.0328163	0.0137501
Slit3	-0.463012	-0.136323	0.275417	0.226613	0.231136	-0.214336	-0.16957	0.000171624	-0.404587	-0.0962678	-0.12111	-0.240961	-0.27093	-0.2101	-0.0919888	-0.0210615	0.015321	0.336071	0.0666139	-0.0282317	0.0119528	0.064537	-0.0938664	0.0439951	-0.0274541	-0.00424869	-0.051189	0.0511817	0.00964125
Cks1b	0.465015	-0.214438	-0.0940409	0.348186	0.0163865	0.208068	-0.428734	0.107486	0.333044	-0.14956	0.0018138	0.153446	-0.00747613	0.113341	0.136394	0.0781384	0.0232388	0.263461	0.148056	0.0270477	-0.250318	-0.0159585	-0.0456653	-0.102121	-0.0781793	-0.000455182	-0.00173464	0.013091	0.00289361
Pdpn	0.755413	0.0750377	0.269701	0.234339	-0.156446	0.257817	-0.00100798	-0.258199	-0.0746377	-0.0699058	0.0306311	-0.0917543	-0.104706	-0.122851	0.214539	0.0253605	-0.0410097	0.023006	0.0202839	-0.145255	0.0746597	0.101693	0.0189615	0.0193706	-0.0112711	0.0648239	0.0273915	-0.00284577	-0.0213169
9030617O03Rik	-0.553253	-0.560743	-0.068873	0.0912194	0.245474	0.00459044	0.0201749	-0.0274139	0.149885	0.144596	-0.225127	0.164671	-0.165911	-0.0275451	-0.109161	-0.0429537	0.169597	-0.0631927	0.174913	0.118723	-0.0343187	-0.139141	-0.100416	-0.0552288	0.105042	-0.102153	-0.0860319	0.0218289	0.0359608
Calr	0.499334	0.237288	-0.228585	0.4861	-0.164982	0.189074	0.077901	0.363392	-0.141398	0.135387	-0.162849	-0.0892975	0.0334891	0.197135	-0.149983	-0.128108	0.0252535	0.0435488	-0.20335	-0.00881091	-0.0616574	-0.0403659	-0.0194865	0.00263312	0.00917987	0.00308687	-0.0367008	0.00961895	0.041284
Ddx39	0.788985	-0.150409	0.0336257	-0.192935	0.113067	0.0284419	0.234802	0.0577695	0.136107	0.0570102	0.0266867	-0.0522759	-0.0599116	-0.214904	-0.28179	-0.136963	0.191137	0.0846126	0.00755703	-0.0316096	-0.139175	0.0515448	-0.00254766	-0.0514085	-0.0393068	-0.0127688	0.0127028	0.00277698	0.00159863
Socs3	0.750851	0.174035	-0.0737194	0.0967886	-0.416865	-0.0703197	0.129273	0.110061	-0.013372	0.150473	-0.0684712	-0.0112382	0.105403	0.169471	-0.0499438	0.0852299	0.262164	0.131467	-0.100965	-0.0566777	0.0358626	-0.0369905	0.0082922	0.046405	-0.00279116	0.00417717	-0.0138598	-0.0398582	-0.0161097
1110007F12Rik	-0.417263	-0.148733	-0.522561	-0.0531504	-0.480423	0.0364408	0.14582	0.0774403	0.113582	-0.180822	-0.126084	-0.000305106	-0.0610993	-0.110423	-0.0632429	-0.244744	-0.0582855	-0.0596416	-0.0549971	-0.0860499	0.186369	0.116308	0.112273	-0.141215	-0.14842	-0.0647418	0.0478701	-0.0202906	0.00667089
Psap	0.232433	0.0821996	-0.0829473	0.0100622	0.219478	0.233268	-0.0781876	0.629463	-0.250844	0.0889737	-0.0245283	0.0790522	0.0635638	-0.186086	-0.0549255	-0.311234	0.152066	-0.0624905	0.141226	0.154521	0.000261101	-0.0713019	0.181458	0.0481269	-0.0924784	0.0309494	0.139104	0.123295	-0.23629
	0.662509	-0.233893	0.277441	-0.0531686	0.148921	0.397321	0.226637	-0.122369	-0.0293203	-0.0420307	0.101812	0.213861	-0.0781086	0.00189638	-0.0829671	-0.0726084	0.0767554	0.0174375	-0.0202154	-0.200598	-0.0137034	-0.00757308	-0.131999	0.180276	-0.000125376	0.0731317	-0.0196737	0.0195597	0.00875276
Slco4a1	0.378458	-0.267711	-0.346828	-0.273659	-0.116851	0.383271	-0.0118612	-0.18092	-0.32166	0.163637	-0.0236756	0.0647406	0.0805481	0.351116	0.0894686	-0.155879	-0.0541626	-0.0323344	0.116657	-0.0795386	-0.0111803	0.106318	0.0717186	-0.233703	-0.032148	0.0312909	0.0366611	-0.0308279	0.00446855
9830001H06Rik	-0.740451	-0.426501	0.110164	0.155108	-0.192746	-0.0588289	0.041531	0.0683797	0.02407	-0.293038	0.0521126	0.118612	-0.101301	-0.116145	-0.140266	0.00312576	-0.0334531	0.124592	-0.0488196	-0.00768657	-0.0242096	-0.104945	0.0390091	-0.00199157	-0.0838514	0.00869068	0.0203436	0.00339458	-0.0144358
	0.489113	0.0726631	0.259252	0.212634	0.176637	-0.0232785	-0.466113	-0.267332	0.12928	0.149327	0.189074	0.23024	0.0709701	0.192642	-0.0405455	0.0903444	0.204694	0.0539911	0.0356309	-0.0502597	-0.0871313	-0.120682	-0.14582	-0.220081	0.0312336	-0.0317397	-0.000907048	0.00421303	0.0200346
Rps2	0.767411	-0.053835	0.155989	0.0801849	0.171344	0.380709	0.274604	0.110248	0.0632056	-0.192087	-0.0946267	-0.0561003	0.0963472	0.0545716	-0.133658	0.0356346	0.0757382	0.0387797	0.0422549	-0.0777538	0.0446832	0.0400818	0.00301732	-0.0118121	0.106419	0.0193373	-0.0243919	-0.0054528	0.00498364
Lcp1	0.502914	-0.571102	0.224464	0.0336298	-0.151742	-0.270508	0.119963	-0.166131	0.0090239	0.0223366	-0.0067811	-0.122197	-0.157405	0.0635084	-0.116194	0.231497	0.212932	-0.189623	0.0935058	-0.135805	0.0377	0.0425044	0.00887873	0.0468934	-0.0734028	-0.00846548	0.0115531	-0.00404241	0.0124448
Slc39a14	0.64791	0.290604	0.079193	-0.111819	-0.40302	0.0366974	-0.296223	0.0175425	-0.122832	0.235395	-0.0751123	0.0244933	-0.102655	0.0521027	0.0211874	0.119987	0.0323236	0.275934	0.0298501	-0.0532558	-0.0382221	0.0601368	0.131129	-0.128869	-0.0188843	-0.00154455	0.00777862	-0.00140124	-0.0104014
Chordc1	0.362995	0.585083	0.334493	-0.222168	-0.35442	-0.236866	-0.0721579	0.232641	0.0536424	0.0342129	0.134153	0.0136719	0.136313	0.147212	0.0614157	-0.105609	-0.0535567	-0.0488132	0.0084531	0.0247101	0.0124928	-0.0174493	-0.0265307	-0.0971246	-0.020198	0.0595418	-0.087404	-0.00676977	-0.134321
Mkks	0.465015	0.668536	-0.111321	-0.144352	-0.00798147	-0.0274959	0.202337	0.00461085	-0.295981	-0.0138924	0.109843	-0.0994656	-0.0249421	-0.0227224	0.195539	-0.0158718	-0.0150543	0.0653035	0.10342	0.0661899	-0.00449701	-0.0717518	0.0631508	0.0489873	-0.164706	-0.205994	-0.099965	0.0416746	0.00323336
Pdlim5	0.523917	0.496067	-0.037669	0.0572007	-0.153293	-0.198659	-0.217254	-0.128455	0.117019	0.0116107	0.0773659	0.0582419	-0.149622	0.269501	0.0376841	-0.351237	0.0287598	-0.0428531	0.0034275	-0.142739	0.043895	0.025874	-0.130847	-0.0617313	0.0654819	-0.11796	0.084365	-0.0983459	-0.153276
Tubb2a	0.600471	0.491801	0.209899	0.187868	0.112367	0.175421	0.182365	0.160331	-0.0122942	-0.0464182	0.0107541	-0.111306	0.258508	-0.187909	-0.0567975	0.0475148	0.103767	0.000742217	-0.0192941	-0.185207	0.092541	0.0879279	0.100309	0.0111892	0.139356	-0.0173384	-0.0289482	0.0159572	-0.0261581
2610203E10Rik	-0.53257	-0.684033	-0.0189844	0.161484	0.077761	0.0459238	-0.0786015	-0.0773714	0.202729	0.0161765	-0.136056	0.114469	-0.00306716	-0.0481859	-0.113413	0.108929	0.0367674	-0.021615	-0.0589979	-0.0156853	-0.122745	0.0268212	0.217599	0.163801	0.0329812	-0.0379482	-0.0589165	0.0117075	-0.00523951
Ssna1	0.283295	0.22733	-0.547961	0.0958437	0.456013	-0.0279889	-0.00829839	0.10938	-0.216264	0.0593474	0.0328871	-0.0725724	-0.30151	-0.0045167	-0.0123533	0.220882	0.123791	-0.111755	-0.17851	-0.127766	0.154314	-0.0866424	-0.0853698	-0.103012	-0.0983578	0.0231145	-0.0575585	0.0191493	-0.0472511
Inmt	-0.55992	0.0934857	-0.00599487	-0.349115	0.224213	0.275851	0.247161	-0.184795	-0.142403	-0.0346936	0.0881052	0.0356793	0.0900493	0.0475286	-0.0453459	-0.164855	0.118588	-0.172049	-0.0746028	-0.0600225	-0.240976	-0.13178	-0.244468	0.232373	0.0199259	0.142628	0.00353074	0.0360497	0.00545871
Hnrpdl	-0.0973927	-0.687717	0.472165	0.124596	-0.103586	0.0483136	-0.209646	-0.0102803	-0.05389	0.20477	0.0339514	0.0323679	0.0344535	0.133569	0.0262702	-0.022532	-0.135574	-0.0955995	-0.0523103	0.115061	-0.148019	0.00848522	0.0265786	0.13727	0.00992695	-0.131041	0.207602	-0.0928363	-0.0264537
Slc12a4	0.543388	0.279813	0.417377	0.351862	-0.00113173	0.316201	0.281622	-0.17729	0.0360035	-0.0598414	-0.155943	0.0394019	0.196236	-0.123377	-0.0584586	-0.0377608	0.0782983	0.0296973	-0.00792723	-0.110881	0.0526859	-0.0164527	0.0571807	-0.0283956	0.0353645	0.00330141	0.00502328	0.0242833	-0.00242625
3200002M19Rik	0.713418	0.102976	-0.311657	0.243144	0.284811	-0.211198	0.0155537	-0.0580597	0.158656	0.0213544	-0.0876643	0.0162354	-0.0366886	-0.0178652	0.119027	-0.0501375	-0.171813	0.116732	0.0468869	-0.0599054	-0.125078	0.0937847	0.00508815	-0.245266	-0.0621142	0.00284159	0.0615995	-0.0249344	0.0329659
	0.725086	-0.181456	0.0396854	0.063425	0.146578	0.295487	0.318948	-0.229061	0.0843226	-0.118706	-0.0760727	-0.14047	-0.00168819	-0.0946855	-0.104868	-0.176845	-0.0111455	0.0845369	-0.0388123	-0.130829	0.0471497	0.0444922	-0.127835	0.131012	-0.0138411	0.104167	0.00434213	0.007602	-0.00720328
Lrrc59	0.638256	0.473724	-0.299918	-0.110086	0.129131	0.142331	0.15788	-0.0196783	0.0510329	-0.199248	0.00281092	-0.100722	0.128881	-0.0142287	0.0348635	-0.075447	-0.0049493	0.109116	0.0768598	-0.208824	0.0815218	-0.0560393	0.178957	0.0814155	0.101929	-0.00496781	-0.0236883	-0.0731324	0.0388896
LOC666415	-0.417556	-0.171658	0.281904	-0.187608	0.223811	-0.140337	-0.518186	0.22949	0.0730094	-0.0203415	-0.189794	0.103813	0.0668592	-0.0564238	0.0128923	-0.0264684	-0.111607	-0.131935	-0.0156025	-0.286438	-0.133283	-0.0698948	-0.0462626	0.00592886	-0.113471	0.086235	0.0124093	-0.231537	0.135749
Steap4	0.730904	-0.0906439	-0.153632	-0.191563	0.260611	-0.255464	0.153911	0.264153	0.0379514	-0.111542	-0.0995621	-0.0795068	-0.130783	0.135034	-0.168006	0.114225	0.0366289	0.127728	-0.0607662	0.0375265	-0.167134	0.0373353	-0.0611388	0.0166995	0.0628981	0.038744	-0.0360153	-0.0285728	0.0147663
	-0.623202	-0.436945	0.0631641	-0.150326	0.0819747	0.00586361	-0.285063	-0.0611012	-0.15521	-0.131829	-0.0611609	-0.078306	0.130551	-0.284929	-0.0604777	-0.222351	-0.0995795	0.106987	-0.135646	0.168053	0.0585528	0.0894194	0.0785938	-0.0736312	0.0585769	-0.0409022	-0.0564793	-0.000621741	-0.0193147
Lrrc33	0.287537	-0.275322	0.261575	0.024206	-0.112379	-0.480857	0.120759	0.269556	0.0764603	-0.201749	0.430024	-0.0494034	0.196995	0.00515771	-0.158426	0.0500875	-0.109257	0.00637544	0.0746707	0.00604515	-0.0856641	0.116112	0.147967	0.112758	0.141368	0.100775	-0.175275	0.0162544	0.0831964
Neurl2	-0.454538	-0.350436	-0.484711	-0.411139	0.0839573	0.0537915	0.185406	0.151608	0.169556	0.105011	0.00625446	-0.0737237	0.0173728	-0.0743894	0.0939167	0.095334	-0.130289	0.0911065	-0.0300831	-0.105943	-0.077704	0.0637234	0.163697	0.123332	0.183707	-0.0274107	-0.0677106	-0.0319694	-0.0263499
Ssr4	0.200486	-0.638407	0.0289947	0.163209	0.407924	0.37844	-0.0187648	-0.0791524	0.0040602	-0.169243	-0.144105	0.0292537	0.0183025	-0.0386292	-0.143661	-0.00961712	0.0268802	0.025426	-0.010743	-0.112228	0.0708131	-0.248419	0.158372	0.0515229	-0.0802484	0.0411375	-0.0694682	-0.0935963	0.0736758
Tubb5	0.670137	0.220841	0.10259	0.369943	0.0998856	0.214035	0.199063	-0.122669	0.215215	-0.0727426	0.112124	-0.297293	-0.217739	-0.060857	0.108432	-0.0111692	-0.0564967	0.0305394	-0.0509393	-0.133293	0.0507356	0.0162118	0.00910496	-0.00687959	-0.00101263	0.0309439	0.0104057	-0.0114564	-0.00949435
2310028H24Rik	0.691123	0.530413	0.0367783	0.029633	-0.289101	0.0728756	0.331205	0.0291767	0.105049	0.00277964	-0.00042057	0.0237483	-0.016414	-0.00746068	-0.0186045	-0.0785723	0.0819946	0.0225351	0.0575985	-0.0256879	-0.0115151	-0.00114113	0.0282003	-0.0491277	0.0389606	-0.0660528	0.0103923	0.0102907	0.0156034
1200007D18Rik	0.451045	0.454771	0.1983	0.0648638	-0.3412	-0.00799615	-0.313157	0.261134	-0.134624	0.00587606	0.165327	0.072196	0.25743	-0.0353248	-0.157859	-0.0238933	-0.235005	0.0416829	0.0108409	0.0240878	0.102797	-0.0463505	-0.101014	-0.0706988	0.164634	-0.0788056	0.023769	0.0146674	0.00924794
Rps2	0.669066	0.229233	0.198751	0.0775338	-0.216373	0.375043	0.0743044	0.168229	0.0240263	0.0690854	0.104023	0.0916377	-0.281373	-0.0552348	0.0658394	-0.0674722	-0.167614	0.227274	0.0961032	0.133146	0.0539263	-0.000803468	-0.0443653	-0.0302337	0.0333551	-0.0532621	-0.0189298	-0.0224839	0.000670612
Sc4mol	0.443077	-0.427224	0.125132	-0.170561	-0.325937	-0.0821704	-0.181993	-0.187591	-0.195425	0.284215	-0.0116355	-0.24542	-0.0051581	-0.09984	-0.16073	0.0268832	-0.2758	-0.0886871	-0.0788117	-0.0117855	0.186907	-0.0418446	-0.128777	-0.176252	0.00124127	0.0286416	0.020059	-0.0576613	0.00796095
Ephx1	-0.631358	0.0263702	0.206201	-0.492192	0.231591	0.317546	-0.0600643	-0.087751	-0.0506142	-0.132232	-0.119916	0.0941272	-0.110649	-0.0808923	-0.033802	-0.025841	0.225928	-0.00331835	0.128884	0.0531244	0.085423	0.0113352	0.015465	-0.0522634	0.0440192	-0.0152295	-0.0359571	0.0430323	-0.00773968
Inhbb	-0.331683	-0.541851	0.126517	0.367041	-0.187574	-0.137659	-0.182462	-0.0576497	0.184947	0.214851	-0.00661306	-0.225176	0.110436	0.180282	0.0904721	-0.0700592	-0.109139	-0.0816136	0.125037	0.0529252	0.0125332	-0.0858758	-0.0607829	-0.233543	0.111325	0.0904097	0.146412	0.143532	0.0249245
Zfand1	-0.549217	-0.56968	-0.232134	0.159328	0.266466	0.109377	0.114019	-0.215395	0.154009	0.12784	-0.140195	-0.0157681	-0.0407926	-0.0703494	-0.0351933	0.00631328	-0.154272	-0.037642	-0.0093782	-0.0292771	-0.126089	0.0220822	0.157897	0.106135	0.0550457	0.0203185	-0.042347	0.0130167	-0.0136052
Setd8	0.564709	0.170292	-0.137123	0.125606	0.161705	-0.486959	0.204174	-0.411797	-0.0227652	0.092317	-0.0480232	-0.211885	0.00190746	-0.0609369	0.0882162	-0.0494362	-0.137847	0.0666984	-0.111944	0.0963845	0.109875	0.0503986	0.0529905	-0.0215779	0.0784406	0.0257531	0.0512146	-0.00343656	-0.0137765
Ykt6	0.722365	0.488226	0.22583	-0.074352	-0.0198381	0.176157	0.0741398	0.125801	-0.135101	0.132963	0.0927336	-0.0950694	0.00403268	-0.0332888	-0.0117308	0.0204053	0.11929	-0.138104	0.0917569	0.0118484	0.00864131	0.0347631	0.0390346	0.000380744	0.160692	-0.0580459	-0.013991	0.0320933	0.0146658
A930021H16Rik	0.114964	-0.619528	-0.62024	0.0654499	0.217145	0.0170304	-0.0300571	0.0601532	-0.0442097	0.0610487	0.0672537	-0.0143459	-0.0733175	-0.01782	-0.0117559	-0.128458	-0.0725823	0.0556089	0.03892	0.014436	0.00209691	0.0991247	-0.0631445	-0.0157715	0.0817522	0.171532	0.151242	0.202135	-0.0727432
4732473B16Rik	0.316686	0.37696	-0.0617666	-0.541145	0.311569	-0.0638719	0.0816298	-0.167794	-0.107211	0.0100899	-0.113892	-0.0533798	0.0175399	0.0276945	0.187742	0.0581176	-0.0560735	0.241721	-0.245202	-0.0799384	-0.0380053	0.202528	-0.0713291	0.0498899	-0.120891	-0.168413	0.10116	0.0982215	0.129939
	0.323391	0.460689	0.451103	-0.0361629	-0.259824	0.105082	0.289615	-0.0525581	0.0320822	0.092131	-0.0884863	0.183097	-0.0188538	0.177803	0.0917496	-0.110878	-0.180381	0.00981639	0.0182566	0.187281	-0.129494	-0.0125686	0.0327105	0.0300908	-0.152459	-0.0814792	0.288559	-0.0930027	-0.0299725
LOC670438	0.0447072	-0.547286	0.196227	-0.244917	-0.0671923	0.388312	0.342162	0.0353261	-0.105551	-0.216227	-0.0966041	-0.0325934	-0.027175	0.0662668	0.123603	0.132244	0.00304359	0.257313	-0.100983	-0.00313102	0.0934925	-0.0432531	-0.0451991	-0.041322	-0.297848	0.18526	0.0358184	-0.0372347	-0.0607224
Pusl1	0.470385	-0.391457	0.38432	-0.332688	0.228587	0.278012	0.18564	-0.0831352	-0.0350553	-0.155078	0.242057	0.0875574	0.109635	0.0199307	-0.156773	0.121911	-0.134952	-0.0501485	-0.0310979	-0.0223629	-0.0132323	0.0406711	0.0942221	0.0238868	0.126139	0.0378863	0.00724126	-0.041331	-0.0151152
Ppl	-0.179152	0.403728	0.205664	-0.171223	0.336937	0.240807	0.329296	0.087441	-0.168352	0.052364	-0.23469	0.240581	-0.104876	0.170263	-0.201546	-0.0772094	0.412335	0.0997468	0.0352836	0.0370177	0.0849915	-0.0655076	0.0273433	-0.0646751	0.077262	-0.0467205	-0.0661615	0.0580487	0.0124337
LOC668212	0.705066	0.179488	0.308879	0.224813	-0.241603	-0.0396891	-0.1101	0.136934	0.0469447	0.168774	0.208974	0.128115	0.111688	-0.281105	-0.00710383	-0.0105877	-0.0991852	-0.142566	-0.0338896	0.00225663	-0.0619161	0.0632987	0.0890086	0.0032272	-0.0244772	-0.0552788	0.026905	0.00035461	0.00125131
Thyn1	0.600119	-0.514674	0.0175519	0.265514	0.188084	-0.190797	-0.0504428	-0.377064	0.0309871	-0.0458781	-0.119139	-0.128627	0.0834487	0.0289526	-0.0558759	-0.0413963	0.0266999	0.0352414	-0.0110877	0.154128	0.0479899	0.0901009	-0.00182677	0.0106729	-0.0467576	0.0121618	0.00166444	-0.0488296	0.0112427
Cox7a2l	-0.416596	0.0997782	-0.282742	0.378786	0.465291	-0.081637	0.0174719	0.305861	0.243101	0.233001	-0.136126	-0.146345	-0.0119092	0.0338595	-0.152678	0.0841645	-0.185361	0.148461	-0.0735871	0.0397554	0.0996737	-0.0632639	-0.0419969	0.0103432	-0.0785284	0.0241302	-0.0549618	-0.00855846	-0.0446308
1700001D09Rik	0.305909	-0.140826	-0.0480372	-0.469455	-0.250369	0.284717	-0.00650578	-0.401463	-0.402096	0.0922896	-0.0568458	-0.0792273	-0.0579867	0.0541683	0.285104	-0.0948818	-0.181667	-0.087573	0.153933	-0.0564915	0.0376065	0.0239717	-0.0561868	-0.0445137	-0.02975	0.0835238	0.00427625	0.00791754	0.00309483
Idi1	0.571128	0.0995685	0.102301	-0.107454	-0.19716	0.198053	-0.0197619	0.0669166	-0.15469	0.555206	0.0362509	-0.118066	0.0149985	0.0552312	-0.289809	0.127255	-0.115652	0.0564867	-0.136199	-0.0156211	-0.124942	-0.0362576	0.128482	-0.195655	-0.0156139	0.0118386	0.0094437	-0.0217074	0.00283328
Herpud1	-0.0186027	0.436451	0.0390758	-0.556306	0.284707	-0.193195	0.0856925	0.0323043	0.0276304	0.0879547	-0.271667	0.185393	-0.0937242	-0.0109058	0.138607	0.0387907	0.116587	0.235355	-0.157231	-0.0782044	-0.119895	0.0941927	0.171458	0.104285	-0.0691173	-0.100624	-0.159498	-0.142279	0.034218
D10Bwg1070e	-0.703841	-0.476819	-0.262095	0.100525	0.0175727	-0.19549	-0.117404	-0.154412	0.136	-0.124568	-0.111997	0.0784819	-0.00857444	0.0398696	0.0224208	-0.0340534	-0.119301	0.138435	-0.0746794	-0.0239631	-0.00285149	-0.0483028	-0.0335531	0.00162932	-0.139474	0.0417897	0.0132141	-0.00438005	-0.042998
Mvp	0.831811	0.0528456	-0.061688	0.0512723	0.015366	0.171575	0.277788	0.19651	0.143267	0.105166	0.0484934	-0.00729693	-0.0142053	-0.0805445	-0.189479	-0.129801	0.18561	-0.0560621	0.0453877	-0.0394715	-0.0274122	0.0865765	0.0021707	-0.0683065	-0.065706	-0.0351247	0.0164633	0.00167486	-0.00479239
D17Ertd441e	0.178305	0.0374505	-0.371917	0.0638908	0.121042	-0.232752	0.238391	-0.540009	-0.0821481	-0.0719464	0.177809	-0.14029	0.0633679	-0.0461715	0.304729	0.0615366	0.016687	-0.143098	-0.12041	0.00803425	-0.197617	0.0603486	-0.110476	-0.000638961	0.0119867	-0.284652	-0.190033	0.167488	-0.0746161
Mettl7a	-0.433302	0.20506	0.16766	-0.429668	-0.305362	-0.445792	0.170081	0.0242392	0.185096	-0.0496925	0.189439	0.0418733	0.0892809	-0.0656705	-0.0610855	0.213927	0.141527	0.0141472	0.100424	0.105474	-0.0171663	0.145052	-0.0839724	-0.029405	0.0737316	-0.067414	0.0865524	0.0799499	-0.0726537
Aldh2	-0.660947	0.153715	0.0960569	-0.363734	-0.289829	0.0269809	-0.132371	-0.207044	-0.158845	-0.251377	-0.0916479	-0.156179	-0.0610279	-0.115025	0.114113	-0.0448856	-0.14829	0.143408	-0.0751268	0.189222	0.029927	-0.00338496	0.0981345	-0.00113886	0.066656	0.00343169	0.0208516	-0.0152189	0.00189982
Ttll3	-0.557355	-0.310628	0.01216	-0.457304	0.0295928	0.113317	-0.282456	-0.235276	-0.0611319	0.0935765	-0.0570081	-0.127825	0.210368	0.204848	0.02398	0.0163757	0.0173674	0.0232891	-0.101961	-0.00846252	0.0225193	-0.0600658	-0.0423655	0.0477622	-0.108873	-0.0912936	-0.143364	-0.222883	0.0753287
Prei4	-0.473676	-0.582909	0.00156874	0.165184	0.0148622	-0.0353452	0.275568	0.0140702	0.0550522	0.0457868	-0.216539	0.106999	-0.192133	0.0264916	0.104442	-0.0739675	0.00347312	0.122526	0.160378	0.140867	-0.112765	-0.181501	0.130545	0.113825	0.0759229	-0.145593	-0.0724059	0.211712	0.0148151
Egfr	0.0618008	0.697833	-0.476509	-0.249042	-0.00417706	-0.0979393	0.0822212	-0.00396779	-0.115677	0.00424753	0.151702	0.143062	-0.0374016	-0.0636736	-0.0336248	0.0810076	-0.0813373	-0.06144	0.0419464	0.152206	-0.049288	-0.0240547	-0.101388	-0.0751188	-0.00312654	-0.0990816	0.214132	-0.00206983	0.154225
Dhrs3	-0.660243	0.0514196	-0.412329	0.124624	-0.0393086	-0.0848483	0.0889504	0.270492	0.156843	0.195051	-0.00789654	0.265249	0.0444798	0.191637	-0.183523	-0.0650597	0.0661283	-0.145668	-0.0346329	0.111637	0.0496127	-0.100544	0.0129158	-0.0660341	-0.128513	-0.0537021	-0.00633509	0.0166378	0.0177892
Runx1t1	-0.660453	-0.234681	-0.204299	0.33583	-0.413914	0.141517	0.163731	0.0331254	-0.00179374	-0.131749	0.0833005	0.0739618	0.102848	-0.127902	0.129797	-0.073817	-0.098576	0.0977731	0.06171	-0.0327987	0.136252	-0.0486022	-0.0156934	-0.0352887	-0.0885814	-0.0210667	0.0135312	-0.0166391	-0.0248354
Fkbp2	0.685233	-0.161987	0.202747	0.273374	-0.34576	0.31843	0.140413	0.0660411	0.0203488	-0.121936	-0.0602125	-0.140841	0.0322447	-0.0396851	-0.0027949	-0.0724625	0.245269	-0.0781258	0.0347741	0.0749296	-0.12966	-0.0362027	-0.0607526	-0.0314856	-0.0117842	0.00239901	0.00318739	-0.0158675	0.0209385
LOC546797	0.481744	0.109726	-0.199242	0.169629	0.482746	0.10563	-0.0663258	0.0610546	0.0691209	-0.281959	0.0313045	-0.271959	0.09378	-0.240033	0.101277	-0.162192	-0.00177008	-0.0657632	0.0232916	-0.219045	-0.162636	-0.0648443	0.230335	-0.149756	0.0709305	-0.0395245	-0.00125251	-0.048256	0.0705647
Tubb4	0.705822	0.236499	-0.238322	0.245691	0.177832	0.0709933	0.0964936	-0.0247601	0.12537	0.0616647	0.0216456	-0.00194386	0.0971637	-0.342778	0.0426645	-0.222161	0.0153092	-0.0529431	0.209319	-0.0618081	0.0306001	-0.0705426	0.0930677	-0.00973341	-0.0900977	-0.0687884	-0.0175808	-0.0531325	0.0520148
Emb	-0.31276	0.101118	-0.197329	0.281935	0.0530277	0.0366257	-0.243466	-0.249078	-0.0986505	0.292536	-0.331988	-0.0298058	-0.38232	0.364825	-0.114141	-0.0601717	0.190829	0.139259	-0.0522949	-0.116496	0.195256	-0.000493167	-0.0168029	0.0361846	-0.172442	0.0217084	-0.0157161	0.0555546	0.0189966
Basp1	0.295237	-0.220098	-0.508732	-0.129962	0.0728258	0.216903	-0.38608	0.174295	-0.233511	0.204105	0.0890343	-0.113692	-0.0492521	-0.108058	0.0999486	0.175218	0.207704	0.00663675	0.24137	-0.0983123	-0.16227	0.0140808	0.0705483	-0.0341469	0.0625671	0.150328	0.0285178	-0.117111	-0.0158048
Nek6	0.750919	-0.0152641	-0.215242	0.154393	-0.053867	-0.110069	-0.137214	0.21357	-0.114779	0.15606	-0.0258164	0.367698	0.070894	-0.0338507	0.0563116	-0.0963745	0.113552	0.128466	-0.0428435	0.00972415	0.0211333	-0.123218	0.145852	0.0933773	-0.0560885	-0.0509662	-0.0721103	-0.0640106	0.0473909
Caskin2	0.245843	0.488475	0.427834	-0.367338	-0.305653	-0.197598	-0.0513582	0.169547	0.0661248	-0.1326	0.120288	0.00408928	0.123452	0.0164889	-0.0016486	-0.144884	-0.0720072	0.0369565	-0.209053	-0.139699	0.0919648	-0.0228437	-0.0517249	0.10149	0.00833732	0.129731	-0.103536	-0.00521278	-0.163718
	0.791795	-0.0399457	0.231883	0.0203133	0.188664	0.422974	0.154216	0.105096	-0.0992452	-0.105718	-0.0211227	0.0560212	0.00699617	0.0925123	-0.0631065	-0.014392	0.032514	0.0164172	-0.0240711	-0.0558607	0.0292886	0.055666	0.0182323	-0.0113642	0.138541	0.0118022	-0.0333759	-0.00339267	0.0253765
	-0.240369	0.0170266	0.260956	-0.181534	-0.500097	-0.0177208	-0.0361527	-0.375122	0.0346706	-0.236236	-0.0273811	0.149173	-0.115773	-0.109044	-0.0129032	0.0186303	0.0277034	-0.0312627	-0.310555	0.0881785	-0.0744463	0.0424188	0.0301574	-0.178605	0.316784	0.10772	-0.150821	0.0620656	-0.240739
Aox1	-0.551772	-0.267512	-0.397616	-0.0982201	0.0972489	0.284952	0.245859	0.154052	0.0581648	-0.0969762	-0.20315	0.0287204	-0.00899989	0.213139	0.257631	0.0454285	0.066152	0.0921514	0.120093	0.0225231	0.241103	-0.0280089	-0.133627	-0.07209	-0.00374425	-0.000679089	-0.0464415	-0.0109675	0.0227681
Ltbp4	-0.527722	0.240013	0.216555	0.38704	0.170972	0.198147	0.0947121	0.32559	0.0435467	-0.220195	-0.315776	-0.0907231	-0.199776	-0.203355	0.0134687	-0.00920964	0.0680186	-0.0310405	0.101943	0.00320729	0.0359379	-0.0434622	-0.0660612	-0.0907	0.00177353	-0.0788746	-0.0574604	0.0299149	0.0411514
	0.65474	0.00160848	-0.131421	0.00439172	0.276001	0.477312	0.031345	0.100701	-0.074135	-0.100021	0.174626	-0.180546	0.0235597	-0.041924	0.167454	-0.20093	0.0958778	0.0353034	-0.0925643	-0.0225344	-0.0519816	-0.158585	0.103034	0.0482815	0.126397	0.0160353	-0.0636628	-0.0744724	0.0585892
Ifi203	-0.331501	-0.486965	-0.167914	-0.278059	-0.0148993	-0.299421	-0.106952	0.139274	-0.0886812	-0.111353	-0.199996	-0.07009	0.293352	0.052539	0.179104	-0.238709	0.0250317	0.134863	0.20823	-0.00696978	0.0841818	-0.0482652	-0.086999	-0.0441635	-0.180741	-0.208252	-0.14566	0.0480976	0.0545317
Pnp	0.650155	0.332727	-0.433011	-0.0562096	0.083292	-0.0237166	0.173622	0.120392	0.0861355	-0.110835	-0.00717719	-0.0334666	-0.0608426	-0.173075	0.0816477	-0.0506334	-0.033414	0.031105	0.311878	0.0185823	0.0309354	-0.0732385	0.122442	0.0462645	0.14316	0.0552173	0.0882478	0.0738096	-0.0101437
LOC673182	0.0478483	0.205411	-0.113552	-0.0242266	0.432034	0.306671	0.510002	0.14173	-0.0986828	0.175767	-0.106118	0.0682216	-0.0848125	-0.0208278	0.0580979	-0.0293673	-0.154324	-0.0415176	0.0785181	0.112283	-0.227169	0.184045	0.355278	0.18371	-0.117801	0.0924055	0.00330951	0.006583	-0.0223743
Mthfd2	0.681939	0.0691399	-0.224815	0.371026	-0.0489676	-0.0825491	-0.222854	0.224843	0.246675	-0.131798	-0.163	0.179986	0.0162187	0.022715	0.161357	-0.0836984	0.123413	-0.117036	-0.111729	-0.00295143	-0.122731	0.0515139	-0.00599214	-0.000530423	-0.0352923	0.00888739	0.00674761	-0.0151596	0.0277545
Slc45a4	-0.091803	-0.624435	0.0893547	0.104965	0.245134	0.156336	-0.348431	-0.0287977	-0.200997	-0.17705	0.00693014	0.181474	-0.0857897	-0.0373338	-0.0836579	0.0215956	0.153701	0.041583	-0.105821	-0.01707	0.215828	-0.273114	0.00391659	-0.0293139	-0.181966	0.192069	0.0997191	0.125437	-0.0192062
Apoe	-0.501684	0.198244	-0.125945	-0.0511857	0.00916681	-0.612342	-0.061681	-0.00573395	-0.00542348	-0.0894987	-0.144128	-0.220165	0.0459986	-0.0119327	0.207512	-0.00677399	0.194675	-0.0275174	-0.111185	0.218337	0.00828463	0.211259	-0.155534	-0.0883914	0.0623578	-0.00275343	0.0380418	0.0828052	-0.0374824
Fads2	0.566875	0.214652	0.424744	0.235289	0.29389	0.0677378	-0.0964449	-0.109434	-0.270467	0.0642705	-0.17844	-0.0232698	0.0697836	0.166056	0.0210857	0.194931	-0.0407652	-0.0369236	0.0693561	0.146386	-0.148823	-0.0413708	0.0752206	-0.153403	0.142953	0.00455118	-0.012274	0.00903344	0.0318629
Rpn1	0.498267	0.261152	0.0848703	0.307981	-0.357304	0.353362	-0.334089	0.0548809	-0.105323	0.134844	-0.0903464	0.14186	0.0965151	0.0441559	0.197604	-0.0469208	0.0414617	0.204022	-0.123551	0.178368	-0.0214957	-0.0318995	-0.0299559	0.0703718	0.0709965	-0.00132348	-0.0376283	0.00466677	0.00250543
Gup1	-0.372097	0.211854	-0.458271	-0.515225	0.0241465	0.125191	0.0113007	0.0525129	-0.0277797	0.1591	0.101171	0.0841172	0.0202688	-0.0180208	0.153143	0.114071	-0.14864	-0.170833	0.0410856	0.221124	0.0313301	0.0833769	0.0265611	0.250343	-0.0650332	0.0714024	-0.0858691	0.0854796	0.210418
Cd300lf	0.508656	-0.555273	0.00815115	0.0182906	0.238457	-0.281737	0.299489	-0.0348082	-0.0228945	-0.111841	-0.0981361	0.324293	0.0363573	0.161732	-0.134721	-0.0173724	-0.0395474	-0.0534955	0.106245	-0.0547627	0.0147722	0.0696541	-0.00315109	-0.0122106	-0.0771208	-0.00246663	0.0136784	-0.0330347	0.021543
B3gnt4	-0.45391	-0.526368	-0.136859	-0.365205	0.200665	0.30724	0.0273174	-0.107082	0.00431831	0.218896	-0.078057	-0.0288157	-0.0485744	0.0163677	0.12546	0.107876	-0.15109	-0.0290985	0.0118908	0.0208152	-0.108678	0.0658129	0.157773	0.137996	0.200207	-0.0185947	-0.0865785	-0.027724	-0.00635063
Irx1	0.30419	0.241362	0.474707	-0.328485	-0.00507978	-0.226038	0.0899925	-0.0537818	0.0822487	0.558052	-0.158613	-0.0521448	-0.112838	-0.0411582	0.100514	-0.155029	0.129012	0.0601213	-0.0500669	-0.0133302	-0.137313	0.0418899	0.0692624	0.0193152	0.0704138	-0.0368612	-0.0123879	0.0302245	0.0558511
Abat	-0.319213	0.168092	-0.51451	-0.134289	0.0430589	0.275832	0.3226	-0.0719936	0.0402292	-0.263106	0.328946	-0.0049953	0.205522	0.100828	-0.0111276	0.164197	0.131359	0.0264365	-0.108206	0.147997	0.0697105	-0.124321	-0.0814814	-0.0304895	0.0459385	-0.0143246	0.208293	-0.0227889	0.125173
Rgs3	-0.61426	-0.540282	-0.0597991	0.11865	-0.109482	0.00404462	-0.0450566	-0.0263552	0.19903	-0.267478	0.00149868	0.243581	-0.0866162	-0.0773826	-0.228938	-0.0797641	-0.0314101	0.0942587	-0.00904513	-0.0637991	-0.0698023	-0.0568399	0.0600778	0.0134887	0.151589	-0.0740472	-0.0305018	-0.0124651	0.0132984
Mtmr4	0.310411	0.485458	-0.28819	-0.0739225	-0.408872	-0.172658	0.00514329	-0.20634	0.335559	-0.00379751	0.117474	0.0333932	0.0833715	-0.0413858	-0.149118	-0.050503	-0.0552646	-0.0502473	0.0044379	-0.0529838	-0.0686918	0.160626	-0.176584	-0.159597	-0.00235852	-0.0295843	-0.272788	-0.0624849	0.0641155
BC022623	-0.622367	0.0871414	-0.209064	-0.0750142	-0.54508	0.0934176	0.126205	0.222091	0.107042	-0.00677076	0.171824	0.069118	0.0197234	0.0156219	-0.118622	0.0106905	0.206429	0.0102398	-0.106773	-0.147116	0.139215	-0.066152	0.124306	-0.0191028	-0.0672783	-0.0503511	0.013429	-0.0134934	-0.0354587
Crem	0.248796	0.588328	0.356815	-0.199087	-0.356653	-0.281736	-0.0255137	0.305248	0.0998028	0.0901623	0.0912203	0.0351893	0.135814	0.180066	0.0853777	-0.144668	-0.0218122	-0.0169286	-0.0211883	0.0526765	0.0117953	-0.00977265	-0.0295432	-0.0556825	-0.00441892	-0.0256549	0.0696886	0.00663088	0.0640699
